# Supplementary material for: Using a calibrated upper living position of marine biota to calculate coseismic uplift: a case study of the 2016 Kaikōura earthquake, New Zealand
Source: Copernicus journal article supplement (doi:10.5194/esurf-8-351-2020), 2020-05-08
Supplement: Supplementary file 1 [file esurf-8-351-2020-supplement.zip]

Archive with 5 entries (5 files):
- esurf-8-351-2020-supplement-title-page.pdf
- Supplementary File S1.xlsx
- Supplementary File S4.docx
- Supplementary File S2.xlsx
- Supplementary File S3.xlsx
