# Supplementary material for: Using a calibrated upper living position of marine biota to calculate coseismic uplift: a case study of the 2016 Kaikōura earthquake, New Zealand
Source: Copernicus journal article supplement (doi:10.5194/esurf-8-351-2020), 2020-05-08
Supplement: Supplementary file 1 [file esurf-8-351-2020-supplement.zip › esurf-8-351-2020-supplement-title-page.pdf]

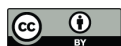

## *Supplement of*

# **Using a calibrated upper living position of marine biota to calculate coseismic uplift: a case study of the 2016 Kaikōura earthquake, New Zealand**

**Catherine Reid et al.**

*Correspondence to:* Vasiliki Mouslopoulou ([vasiliki.mouslopoulou@noa.gr](mailto:vasiliki.mouslopoulou@noa.gr))

- [esurf-8-351-2020-supplement-title-page.pdf](#)
- [Supplementary File S1.xlsx](#)
- [Supplementary File S2.xlsx](#)
- [Supplementary File S3.xlsx](#)
- [Supplementary File S4.docx](#)

The copyright of individual parts of the supplement might differ from the CC BY 4.0 License.
