# Supplementary material for: Using a calibrated upper living position of marine biota to calculate coseismic uplift: a case study of the 2016 Kaikōura earthquake, New Zealand
Source: Copernicus journal article supplement (doi:10.5194/esurf-8-351-2020), 2020-05-08
Supplement: Supplementary file 1 [file esurf-8-351-2020-supplement.zip › Supplementary File S1.xlsx]

## Sheet: Method A
KAIKOURA GAUGE NOVEMBER 2016 PRE-EQ							PRE-EQ					KAIKOURA GAUGE DEC 27 2016-JAN 2017 POST-EQ (SEE BELOW)			PRE-EQ
ID	Tide Gauge	UTC date/time	Elevation_m	NZ_Date	NZ_Time		Ave	SD		Tide Gauge	UTC date/time	Elevation_m	NZ_Date	NZ_Time	Ave	SD	UPLIFT
1	KAIT	2016-11-01 06:04:00	3.577	2016-11-01	19:04:00	HT 1.7	3.06228	0.440012	1	KAIT	2016-12-26 15:06:00	2.722	2016-12-27	04:06:00	2.10727	0.287889	0.95501
2	KAIT	2016-11-01 06:05:00	3.545	2016-11-01	19:05:00				2	KAIT	2016-12-26 15:07:00	2.729	2016-12-27	04:07:00
3	KAIT	2016-11-01 06:06:00	3.603	2016-11-01	19:06:00				3	KAIT	2016-12-26 15:08:00	2.735	2016-12-27	04:08:00
4	KAIT	2016-11-01 06:07:00	3.575	2016-11-01	19:07:00				4	KAIT	2016-12-26 15:09:00	2.731	2016-12-27	04:09:00
5	KAIT	2016-11-01 06:08:00	3.567	2016-11-01	19:08:00				5	KAIT	2016-12-26 15:10:00	2.723	2016-12-27	04:10:00
6	KAIT	2016-11-01 06:09:00	3.578	2016-11-01	19:09:00				6	KAIT	2016-12-26 15:11:00	2.726	2016-12-27	04:11:00
7	KAIT	2016-11-01 06:10:00	3.593	2016-11-01	19:10:00				7	KAIT	2016-12-26 15:12:00	2.732	2016-12-27	04:12:00
8	KAIT	2016-11-01 06:11:00	3.54	2016-11-01	19:11:00				8	KAIT	2016-12-26 15:13:00	2.729	2016-12-27	04:13:00
9	KAIT	2016-11-01 06:12:00	3.556	2016-11-01	19:12:00				9	KAIT	2016-12-26 15:14:00	2.724	2016-12-27	04:14:00
10	KAIT	2016-11-01 06:13:00	3.566	2016-11-01	19:13:00				10	KAIT	2016-12-26 15:15:00	2.717	2016-12-27	04:15:00
11	KAIT	2016-11-01 06:14:00	3.56	2016-11-01	19:14:00				11	KAIT	2016-12-26 15:16:00	2.706	2016-12-27	04:16:00
12	KAIT	2016-11-01 06:15:00	3.574	2016-11-01	19:15:00				12	KAIT	2016-12-26 15:17:00	2.704	2016-12-27	04:17:00
13	KAIT	2016-11-01 06:16:00	3.556	2016-11-01	19:16:00				13	KAIT	2016-12-26 15:18:00	2.688	2016-12-27	04:18:00
14	KAIT	2016-11-01 06:17:00	3.58	2016-11-01	19:17:00				14	KAIT	2016-12-26 15:19:00	2.68	2016-12-27	04:19:00
15	KAIT	2016-11-01 06:18:00	3.596	2016-11-01	19:18:00				15	KAIT	2016-12-26 15:20:00	2.673	2016-12-27	04:20:00
16	KAIT	2016-11-01 06:19:00	3.566	2016-11-01	19:19:00				16	KAIT	2016-12-26 15:21:00	2.672	2016-12-27	04:21:00						3.07
17	KAIT	2016-11-01 06:20:00	3.567	2016-11-01	19:20:00				17	KAIT	2016-12-26 15:22:00	2.675	2016-12-27	04:22:00						2.11
18	KAIT	2016-11-01 06:21:00	3.579	2016-11-01	19:21:00				18	KAIT	2016-12-26 15:23:00	2.682	2016-12-27	04:23:00						0.96
19	KAIT	2016-11-01 06:22:00	3.569	2016-11-01	19:22:00				19	KAIT	2016-12-26 15:24:00	2.687	2016-12-27	04:24:00
20	KAIT	2016-11-01 06:23:00	3.572	2016-11-01	19:23:00				20	KAIT	2016-12-26 15:25:00	2.693	2016-12-27	04:25:00
21	KAIT	2016-11-01 06:24:00	3.587	2016-11-01	19:24:00				21	KAIT	2016-12-26 15:26:00	2.695	2016-12-27	04:26:00
22	KAIT	2016-11-01 06:25:00	3.549	2016-11-01	19:25:00				22	KAIT	2016-12-26 15:27:00	2.69	2016-12-27	04:27:00
23	KAIT	2016-11-01 06:26:00	3.565	2016-11-01	19:26:00				23	KAIT	2016-12-26 15:28:00	2.687	2016-12-27	04:28:00
24	KAIT	2016-11-01 06:27:00	3.555	2016-11-01	19:27:00				24	KAIT	2016-12-26 15:29:00	2.684	2016-12-27	04:29:00
25	KAIT	2016-11-01 06:28:00	3.55	2016-11-01	19:28:00				25	KAIT	2016-12-26 15:30:00	2.69	2016-12-27	04:30:00
26	KAIT	2016-11-01 06:29:00	3.553	2016-11-01	19:29:00				26	KAIT	2016-12-26 15:31:00	2.7	2016-12-27	04:31:00
27	KAIT	2016-11-01 06:30:00	3.553	2016-11-01	19:30:00				27	KAIT	2016-12-26 15:32:00	2.71	2016-12-27	04:32:00
28	KAIT	2016-11-01 06:31:00	3.521	2016-11-01	19:31:00				28	KAIT	2016-12-26 15:33:00	2.716	2016-12-27	04:33:00
29	KAIT	2016-11-01 06:32:00	3.56	2016-11-01	19:32:00				29	KAIT	2016-12-26 15:34:00	2.722	2016-12-27	04:34:00
30	KAIT	2016-11-01 06:33:00	3.536	2016-11-01	19:33:00				30	KAIT	2016-12-26 15:35:00	2.729	2016-12-27	04:35:00
31	KAIT	2016-11-01 06:34:00	3.562	2016-11-01	19:34:00				31	KAIT	2016-12-26 15:36:00	2.73	2016-12-27	04:36:00
32	KAIT	2016-11-01 06:35:00	3.553	2016-11-01	19:35:00				32	KAIT	2016-12-26 15:37:00	2.729	2016-12-27	04:37:00
33	KAIT	2016-11-01 06:36:00	3.555	2016-11-01	19:36:00				33	KAIT	2016-12-26 15:38:00	2.737	2016-12-27	04:38:00
34	KAIT	2016-11-01 06:37:00	3.568	2016-11-01	19:37:00				34	KAIT	2016-12-26 15:39:00	2.734	2016-12-27	04:39:00
35	KAIT	2016-11-01 06:38:00	3.559	2016-11-01	19:38:00				35	KAIT	2016-12-26 15:40:00	2.725	2016-12-27	04:40:00
36	KAIT	2016-11-01 06:39:00	3.586	2016-11-01	19:39:00				36	KAIT	2016-12-26 15:41:00	2.721	2016-12-27	04:41:00
37	KAIT	2016-11-01 06:40:00	3.539	2016-11-01	19:40:00				37	KAIT	2016-12-26 15:42:00	2.707	2016-12-27	04:42:00
38	KAIT	2016-11-01 06:41:00	3.559	2016-11-01	19:41:00				38	KAIT	2016-12-26 15:43:00	2.697	2016-12-27	04:43:00
39	KAIT	2016-11-01 06:42:00	3.548	2016-11-01	19:42:00				39	KAIT	2016-12-26 15:44:00	2.691	2016-12-27	04:44:00
40	KAIT	2016-11-01 06:43:00	3.579	2016-11-01	19:43:00				40	KAIT	2016-12-26 15:45:00	2.689	2016-12-27	04:45:00
41	KAIT	2016-11-01 06:44:00	3.549	2016-11-01	19:44:00				41	KAIT	2016-12-26 15:46:00	2.695	2016-12-27	04:46:00
42	KAIT	2016-11-01 06:45:00	3.591	2016-11-01	19:45:00				42	KAIT	2016-12-26 15:47:00	2.684	2016-12-27	04:47:00
43	KAIT	2016-11-01 06:46:00	3.535	2016-11-01	19:46:00				43	KAIT	2016-12-26 15:48:00	2.689	2016-12-27	04:48:00
44	KAIT	2016-11-01 06:47:00	3.554	2016-11-01	19:47:00				44	KAIT	2016-12-26 15:49:00	2.694	2016-12-27	04:49:00
45	KAIT	2016-11-01 06:48:00	3.551	2016-11-01	19:48:00				45	KAIT	2016-12-26 15:50:00	2.69	2016-12-27	04:50:00
46	KAIT	2016-11-01 06:49:00	3.547	2016-11-01	19:49:00				46	KAIT	2016-12-26 15:51:00	2.679	2016-12-27	04:51:00
47	KAIT	2016-11-01 06:50:00	3.528	2016-11-01	19:50:00				47	KAIT	2016-12-26 15:52:00	2.667	2016-12-27	04:52:00
48	KAIT	2016-11-01 06:51:00	3.551	2016-11-01	19:51:00				48	KAIT	2016-12-26 15:53:00	2.666	2016-12-27	04:53:00
49	KAIT	2016-11-01 06:52:00	3.522	2016-11-01	19:52:00				49	KAIT	2016-12-26 15:54:00	2.663	2016-12-27	04:54:00
50	KAIT	2016-11-01 06:53:00	3.504	2016-11-01	19:53:00				50	KAIT	2016-12-26 15:55:00	2.658	2016-12-27	04:55:00
51	KAIT	2016-11-01 06:54:00	3.536	2016-11-01	19:54:00				51	KAIT	2016-12-26 15:56:00	2.659	2016-12-27	04:56:00
52	KAIT	2016-11-01 06:55:00	3.528	2016-11-01	19:55:00				52	KAIT	2016-12-26 15:57:00	2.666	2016-12-27	04:57:00
53	KAIT	2016-11-01 06:56:00	3.512	2016-11-01	19:56:00				53	KAIT	2016-12-26 15:58:00	2.672	2016-12-27	04:58:00
54	KAIT	2016-11-01 06:57:00	3.533	2016-11-01	19:57:00				54	KAIT	2016-12-26 15:59:00	2.685	2016-12-27	04:59:00
55	KAIT	2016-11-01 06:58:00	3.516	2016-11-01	19:58:00				55	KAIT	2016-12-26 16:00:00	2.701	2016-12-27	05:00:00
56	KAIT	2016-11-01 06:59:00	3.499	2016-11-01	19:59:00				56	KAIT	2016-12-26 16:01:00	2.707	2016-12-27	05:01:00
57	KAIT	2016-11-01 07:00:00	3.492	2016-11-01	20:00:00				57	KAIT	2016-12-26 16:02:00	2.689	2016-12-27	05:02:00
58	KAIT	2016-11-01 07:01:00	3.484	2016-11-01	20:01:00				58	KAIT	2016-12-26 16:03:00	2.676	2016-12-27	05:03:00
59	KAIT	2016-11-01 07:02:00	3.504	2016-11-01	20:02:00				59	KAIT	2016-12-26 16:04:00	2.661	2016-12-27	05:04:00
60	KAIT	2016-11-01 07:03:00	3.493	2016-11-01	20:03:00				60	KAIT	2016-12-26 16:05:00	2.659	2016-12-27	05:05:00
61	KAIT	2016-11-01 07:04:00	3.458	2016-11-01	20:04:00				61	KAIT	2016-12-26 16:06:00	2.658	2016-12-27	05:06:00
62	KAIT	2016-11-01 07:05:00	3.5	2016-11-01	20:05:00				62	KAIT	2016-12-26 16:07:00	2.671	2016-12-27	05:07:00
63	KAIT	2016-11-01 07:06:00	3.487	2016-11-01	20:06:00				63	KAIT	2016-12-26 16:08:00	2.678	2016-12-27	05:08:00
64	KAIT	2016-11-01 07:07:00	3.488	2016-11-01	20:07:00				64	KAIT	2016-12-26 16:09:00	2.668	2016-12-27	05:09:00
65	KAIT	2016-11-01 07:08:00	3.493	2016-11-01	20:08:00				65	KAIT	2016-12-26 16:10:00	2.684	2016-12-27	05:10:00
66	KAIT	2016-11-01 07:09:00	3.484	2016-11-01	20:09:00				66	KAIT	2016-12-26 16:11:00	2.682	2016-12-27	05:11:00
67	KAIT	2016-11-01 07:10:00	3.492	2016-11-01	20:10:00				67	KAIT	2016-12-26 16:12:00	2.672	2016-12-27	05:12:00
68	KAIT	2016-11-01 07:11:00	3.498	2016-11-01	20:11:00				68	KAIT	2016-12-26 16:13:00	2.66	2016-12-27	05:13:00
69	KAIT	2016-11-01 07:12:00	3.494	2016-11-01	20:12:00				69	KAIT	2016-12-26 16:14:00	2.661	2016-12-27	05:14:00
70	KAIT	2016-11-01 07:13:00	3.484	2016-11-01	20:13:00				70	KAIT	2016-12-26 16:15:00	2.648	2016-12-27	05:15:00
71	KAIT	2016-11-01 07:14:00	3.472	2016-11-01	20:14:00				71	KAIT	2016-12-26 16:16:00	2.649	2016-12-27	05:16:00
72	KAIT	2016-11-01 07:15:00	3.475	2016-11-01	20:15:00				72	KAIT	2016-12-26 16:17:00	2.657	2016-12-27	05:17:00
73	KAIT	2016-11-01 07:16:00	3.473	2016-11-01	20:16:00				73	KAIT	2016-12-26 16:18:00	2.658	2016-12-27	05:18:00
74	KAIT	2016-11-01 07:17:00	3.482	2016-11-01	20:17:00				74	KAIT	2016-12-26 16:19:00	2.664	2016-12-27	05:19:00
75	KAIT	2016-11-01 07:18:00	3.473	2016-11-01	20:18:00				75	KAIT	2016-12-26 16:20:00	2.655	2016-12-27	05:20:00
76	KAIT	2016-11-01 07:19:00	3.447	2016-11-01	20:19:00				76	KAIT	2016-12-26 16:21:00	2.647	2016-12-27	05:21:00
77	KAIT	2016-11-01 07:20:00	3.472	2016-11-01	20:20:00				77	KAIT	2016-12-26 16:22:00	2.642	2016-12-27	05:22:00
78	KAIT	2016-11-01 07:21:00	3.451	2016-11-01	20:21:00				78	KAIT	2016-12-26 16:23:00	2.64	2016-12-27	05:23:00
79	KAIT	2016-11-01 07:22:00	3.452	2016-11-01	20:22:00				79	KAIT	2016-12-26 16:24:00	2.621	2016-12-27	05:24:00
80	KAIT	2016-11-01 07:23:00	3.444	2016-11-01	20:23:00				80	KAIT	2016-12-26 16:25:00	2.621	2016-12-27	05:25:00
81	KAIT	2016-11-01 07:24:00	3.469	2016-11-01	20:24:00				81	KAIT	2016-12-26 16:26:00	2.606	2016-12-27	05:26:00
82	KAIT	2016-11-01 07:25:00	3.448	2016-11-01	20:25:00				82	KAIT	2016-12-26 16:27:00	2.607	2016-12-27	05:27:00
83	KAIT	2016-11-01 07:26:00	3.444	2016-11-01	20:26:00				83	KAIT	2016-12-26 16:28:00	2.592	2016-12-27	05:28:00
84	KAIT	2016-11-01 07:27:00	3.459	2016-11-01	20:27:00				84	KAIT	2016-12-26 16:29:00	2.572	2016-12-27	05:29:00
85	KAIT	2016-11-01 07:28:00	3.459	2016-11-01	20:28:00				85	KAIT	2016-12-26 16:30:00	2.576	2016-12-27	05:30:00
86	KAIT	2016-11-01 07:29:00	3.438	2016-11-01	20:29:00				86	KAIT	2016-12-26 16:31:00	2.569	2016-12-27	05:31:00
87	KAIT	2016-11-01 07:30:00	3.448	2016-11-01	20:30:00				87	KAIT	2016-12-26 16:32:00	2.583	2016-12-27	05:32:00
88	KAIT	2016-11-01 07:31:00	3.412	2016-11-01	20:31:00				88	KAIT	2016-12-26 16:33:00	2.582	2016-12-27	05:33:00
89	KAIT	2016-11-01 07:32:00	3.419	2016-11-01	20:32:00				89	KAIT	2016-12-26 16:34:00	2.588	2016-12-27	05:34:00
90	KAIT	2016-11-01 07:33:00	3.438	2016-11-01	20:33:00				90	KAIT	2016-12-26 16:35:00	2.595	2016-12-27	05:35:00
91	KAIT	2016-11-01 07:34:00	3.422	2016-11-01	20:34:00				91	KAIT	2016-12-26 16:36:00	2.587	2016-12-27	05:36:00
92	KAIT	2016-11-01 07:35:00	3.424	2016-11-01	20:35:00				92	KAIT	2016-12-26 16:37:00	2.581	2016-12-27	05:37:00
93	KAIT	2016-11-01 07:36:00	3.429	2016-11-01	20:36:00				93	KAIT	2016-12-26 16:38:00	2.586	2016-12-27	05:38:00
94	KAIT	2016-11-01 07:37:00	3.401	2016-11-01	20:37:00				94	KAIT	2016-12-26 16:39:00	2.586	2016-12-27	05:39:00
95	KAIT	2016-11-01 07:38:00	3.414	2016-11-01	20:38:00				95	KAIT	2016-12-26 16:40:00	2.596	2016-12-27	05:40:00
96	KAIT	2016-11-01 07:39:00	3.42	2016-11-01	20:39:00				96	KAIT	2016-12-26 16:41:00	2.594	2016-12-27	05:41:00
97	KAIT	2016-11-01 07:40:00	3.405	2016-11-01	20:40:00				97	KAIT	2016-12-26 16:42:00	2.606	2016-12-27	05:42:00
98	KAIT	2016-11-01 07:41:00	3.398	2016-11-01	20:41:00				98	KAIT	2016-12-26 16:43:00	2.605	2016-12-27	05:43:00
99	KAIT	2016-11-01 07:42:00	3.391	2016-11-01	20:42:00				99	KAIT	2016-12-26 16:44:00	2.595	2016-12-27	05:44:00
100	KAIT	2016-11-01 07:43:00	3.389	2016-11-01	20:43:00				100	KAIT	2016-12-26 16:45:00	2.583	2016-12-27	05:45:00
101	KAIT	2016-11-01 07:44:00	3.348	2016-11-01	20:44:00				101	KAIT	2016-12-26 16:46:00	2.581	2016-12-27	05:46:00
102	KAIT	2016-11-01 07:45:00	3.358	2016-11-01	20:45:00				102	KAIT	2016-12-26 16:47:00	2.569	2016-12-27	05:47:00
103	KAIT	2016-11-01 07:46:00	3.381	2016-11-01	20:46:00				103	KAIT	2016-12-26 16:48:00	2.569	2016-12-27	05:48:00
104	KAIT	2016-11-01 07:47:00	3.368	2016-11-01	20:47:00				104	KAIT	2016-12-26 16:49:00	2.573	2016-12-27	05:49:00
105	KAIT	2016-11-01 07:48:00	3.384	2016-11-01	20:48:00				105	KAIT	2016-12-26 16:50:00	2.566	2016-12-27	05:50:00
106	KAIT	2016-11-01 07:49:00	3.358	2016-11-01	20:49:00				106	KAIT	2016-12-26 16:51:00	2.554	2016-12-27	05:51:00
107	KAIT	2016-11-01 07:50:00	3.365	2016-11-01	20:50:00				107	KAIT	2016-12-26 16:52:00	2.542	2016-12-27	05:52:00
108	KAIT	2016-11-01 07:51:00	3.373	2016-11-01	20:51:00				108	KAIT	2016-12-26 16:53:00	2.539	2016-12-27	05:53:00
109	KAIT	2016-11-01 07:52:00	3.366	2016-11-01	20:52:00				109	KAIT	2016-12-26 16:54:00	2.529	2016-12-27	05:54:00
110	KAIT	2016-11-01 07:53:00	3.37	2016-11-01	20:53:00				110	KAIT	2016-12-26 16:55:00	2.526	2016-12-27	05:55:00
111	KAIT	2016-11-01 07:54:00	3.367	2016-11-01	20:54:00				111	KAIT	2016-12-26 16:56:00	2.517	2016-12-27	05:56:00
112	KAIT	2016-11-01 07:55:00	3.338	2016-11-01	20:55:00				112	KAIT	2016-12-26 16:57:00	2.521	2016-12-27	05:57:00
113	KAIT	2016-11-01 07:56:00	3.337	2016-11-01	20:56:00				113	KAIT	2016-12-26 16:58:00	2.516	2016-12-27	05:58:00
114	KAIT	2016-11-01 07:57:00	3.363	2016-11-01	20:57:00				114	KAIT	2016-12-26 16:59:00	2.493	2016-12-27	05:59:00
115	KAIT	2016-11-01 07:58:00	3.318	2016-11-01	20:58:00				115	KAIT	2016-12-26 17:00:00	2.487	2016-12-27	06:00:00
116	KAIT	2016-11-01 07:59:00	3.324	2016-11-01	20:59:00				116	KAIT	2016-12-26 17:01:00	2.48	2016-12-27	06:01:00
117	KAIT	2016-11-01 08:00:00	3.338	2016-11-01	21:00:00				117	KAIT	2016-12-26 17:02:00	2.465	2016-12-27	06:02:00
118	KAIT	2016-11-01 08:01:00	3.343	2016-11-01	21:01:00				118	KAIT	2016-12-26 17:03:00	2.457	2016-12-27	06:03:00
119	KAIT	2016-11-01 08:02:00	3.344	2016-11-01	21:02:00				119	KAIT	2016-12-26 17:04:00	2.465	2016-12-27	06:04:00
120	KAIT	2016-11-01 08:03:00	3.325	2016-11-01	21:03:00				120	KAIT	2016-12-26 17:05:00	2.464	2016-12-27	06:05:00
121	KAIT	2016-11-01 08:04:00	3.329	2016-11-01	21:04:00				121	KAIT	2016-12-26 17:06:00	2.467	2016-12-27	06:06:00
122	KAIT	2016-11-01 08:05:00	3.319	2016-11-01	21:05:00				122	KAIT	2016-12-26 17:07:00	2.483	2016-12-27	06:07:00
123	KAIT	2016-11-01 08:06:00	3.335	2016-11-01	21:06:00				123	KAIT	2016-12-26 17:08:00	2.485	2016-12-27	06:08:00
124	KAIT	2016-11-01 08:07:00	3.32	2016-11-01	21:07:00				124	KAIT	2016-12-26 17:09:00	2.497	2016-12-27	06:09:00
125	KAIT	2016-11-01 08:08:00	3.311	2016-11-01	21:08:00				125	KAIT	2016-12-26 17:10:00	2.504	2016-12-27	06:10:00
126	KAIT	2016-11-01 08:09:00	3.287	2016-11-01	21:09:00				126	KAIT	2016-12-26 17:11:00	2.508	2016-12-27	06:11:00
127	KAIT	2016-11-01 08:10:00	3.296	2016-11-01	21:10:00				127	KAIT	2016-12-26 17:12:00	2.505	2016-12-27	06:12:00
128	KAIT	2016-11-01 08:11:00	3.289	2016-11-01	21:11:00				128	KAIT	2016-12-26 17:13:00	2.497	2016-12-27	06:13:00
129	KAIT	2016-11-01 08:12:00	3.277	2016-11-01	21:12:00				129	KAIT	2016-12-26 17:14:00	2.472	2016-12-27	06:14:00
130	KAIT	2016-11-01 08:13:00	3.267	2016-11-01	21:13:00				130	KAIT	2016-12-26 17:15:00	2.472	2016-12-27	06:15:00
131	KAIT	2016-11-01 08:14:00	3.276	2016-11-01	21:14:00				131	KAIT	2016-12-26 17:16:00	2.455	2016-12-27	06:16:00
132	KAIT	2016-11-01 08:15:00	3.282	2016-11-01	21:15:00				132	KAIT	2016-12-26 17:17:00	2.447	2016-12-27	06:17:00
133	KAIT	2016-11-01 08:16:00	3.267	2016-11-01	21:16:00				133	KAIT	2016-12-26 17:18:00	2.428	2016-12-27	06:18:00
134	KAIT	2016-11-01 08:17:00	3.212	2016-11-01	21:17:00				134	KAIT	2016-12-26 17:19:00	2.418	2016-12-27	06:19:00
135	KAIT	2016-11-01 08:18:00	3.255	2016-11-01	21:18:00				135	KAIT	2016-12-26 17:20:00	2.413	2016-12-27	06:20:00
136	KAIT	2016-11-01 08:19:00	3.245	2016-11-01	21:19:00				136	KAIT	2016-12-26 17:21:00	2.41	2016-12-27	06:21:00
137	KAIT	2016-11-01 08:20:00	3.235	2016-11-01	21:20:00				137	KAIT	2016-12-26 17:22:00	2.412	2016-12-27	06:22:00
138	KAIT	2016-11-01 08:21:00	3.222	2016-11-01	21:21:00				138	KAIT	2016-12-26 17:23:00	2.409	2016-12-27	06:23:00
139	KAIT	2016-11-01 08:22:00	3.251	2016-11-01	21:22:00				139	KAIT	2016-12-26 17:24:00	2.403	2016-12-27	06:24:00
140	KAIT	2016-11-01 08:23:00	3.218	2016-11-01	21:23:00				140	KAIT	2016-12-26 17:25:00	2.407	2016-12-27	06:25:00
141	KAIT	2016-11-01 08:24:00	3.219	2016-11-01	21:24:00				141	KAIT	2016-12-26 17:26:00	2.411	2016-12-27	06:26:00
142	KAIT	2016-11-01 08:25:00	3.239	2016-11-01	21:25:00				142	KAIT	2016-12-26 17:27:00	2.411	2016-12-27	06:27:00
143	KAIT	2016-11-01 08:26:00	3.217	2016-11-01	21:26:00				143	KAIT	2016-12-26 17:28:00	2.41	2016-12-27	06:28:00
144	KAIT	2016-11-01 08:27:00	3.218	2016-11-01	21:27:00				144	KAIT	2016-12-26 17:29:00	2.407	2016-12-27	06:29:00
145	KAIT	2016-11-01 08:28:00	3.204	2016-11-01	21:28:00				145	KAIT	2016-12-26 17:30:00	2.386	2016-12-27	06:30:00
146	KAIT	2016-11-01 08:29:00	3.186	2016-11-01	21:29:00				146	KAIT	2016-12-26 17:31:00	2.381	2016-12-27	06:31:00
147	KAIT	2016-11-01 08:30:00	3.224	2016-11-01	21:30:00				147	KAIT	2016-12-26 17:32:00	2.369	2016-12-27	06:32:00
148	KAIT	2016-11-01 08:31:00	3.186	2016-11-01	21:31:00				148	KAIT	2016-12-26 17:33:00	2.356	2016-12-27	06:33:00
149	KAIT	2016-11-01 08:32:00	3.198	2016-11-01	21:32:00				149	KAIT	2016-12-26 17:34:00	2.343	2016-12-27	06:34:00
150	KAIT	2016-11-01 08:33:00	3.196	2016-11-01	21:33:00				150	KAIT	2016-12-26 17:35:00	2.348	2016-12-27	06:35:00
151	KAIT	2016-11-01 08:34:00	3.18	2016-11-01	21:34:00				151	KAIT	2016-12-26 17:36:00	2.335	2016-12-27	06:36:00
152	KAIT	2016-11-01 08:35:00	3.203	2016-11-01	21:35:00				152	KAIT	2016-12-26 17:37:00	2.351	2016-12-27	06:37:00
153	KAIT	2016-11-01 08:36:00	3.192	2016-11-01	21:36:00				153	KAIT	2016-12-26 17:38:00	2.359	2016-12-27	06:38:00
154	KAIT	2016-11-01 08:37:00	3.19	2016-11-01	21:37:00				154	KAIT	2016-12-26 17:39:00	2.356	2016-12-27	06:39:00
155	KAIT	2016-11-01 08:38:00	3.144	2016-11-01	21:38:00				155	KAIT	2016-12-26 17:40:00	2.363	2016-12-27	06:40:00
156	KAIT	2016-11-01 08:39:00	3.171	2016-11-01	21:39:00				156	KAIT	2016-12-26 17:41:00	2.362	2016-12-27	06:41:00
157	KAIT	2016-11-01 08:40:00	3.176	2016-11-01	21:40:00				157	KAIT	2016-12-26 17:42:00	2.354	2016-12-27	06:42:00
158	KAIT	2016-11-01 08:41:00	3.183	2016-11-01	21:41:00				158	KAIT	2016-12-26 17:43:00	2.34	2016-12-27	06:43:00
159	KAIT	2016-11-01 08:42:00	3.142	2016-11-01	21:42:00				159	KAIT	2016-12-26 17:44:00	2.343	2016-12-27	06:44:00
160	KAIT	2016-11-01 08:43:00	3.152	2016-11-01	21:43:00				160	KAIT	2016-12-26 17:45:00	2.339	2016-12-27	06:45:00
161	KAIT	2016-11-01 08:44:00	3.166	2016-11-01	21:44:00				161	KAIT	2016-12-26 17:46:00	2.343	2016-12-27	06:46:00
162	KAIT	2016-11-01 08:45:00	3.15	2016-11-01	21:45:00				162	KAIT	2016-12-26 17:47:00	2.326	2016-12-27	06:47:00
163	KAIT	2016-11-01 08:46:00	3.128	2016-11-01	21:46:00				163	KAIT	2016-12-26 17:48:00	2.315	2016-12-27	06:48:00
164	KAIT	2016-11-01 08:47:00	3.154	2016-11-01	21:47:00				164	KAIT	2016-12-26 17:49:00	2.316	2016-12-27	06:49:00
165	KAIT	2016-11-01 08:48:00	3.138	2016-11-01	21:48:00				165	KAIT	2016-12-26 17:50:00	2.287	2016-12-27	06:50:00
166	KAIT	2016-11-01 08:49:00	3.113	2016-11-01	21:49:00				166	KAIT	2016-12-26 17:51:00	2.292	2016-12-27	06:51:00
167	KAIT	2016-11-01 08:50:00	3.155	2016-11-01	21:50:00				167	KAIT	2016-12-26 17:52:00	2.289	2016-12-27	06:52:00
168	KAIT	2016-11-01 08:51:00	3.1	2016-11-01	21:51:00				168	KAIT	2016-12-26 17:53:00	2.266	2016-12-27	06:53:00
169	KAIT	2016-11-01 08:52:00	3.105	2016-11-01	21:52:00				169	KAIT	2016-12-26 17:54:00	2.263	2016-12-27	06:54:00
170	KAIT	2016-11-01 08:53:00	3.102	2016-11-01	21:53:00				170	KAIT	2016-12-26 17:55:00	2.26	2016-12-27	06:55:00
171	KAIT	2016-11-01 08:54:00	3.076	2016-11-01	21:54:00				171	KAIT	2016-12-26 17:56:00	2.255	2016-12-27	06:56:00
172	KAIT	2016-11-01 08:55:00	3.076	2016-11-01	21:55:00				172	KAIT	2016-12-26 17:57:00	2.249	2016-12-27	06:57:00
173	KAIT	2016-11-01 08:56:00	3.076	2016-11-01	21:56:00				173	KAIT	2016-12-26 17:58:00	2.262	2016-12-27	06:58:00
174	KAIT	2016-11-01 08:57:00	3.089	2016-11-01	21:57:00				174	KAIT	2016-12-26 17:59:00	2.261	2016-12-27	06:59:00
175	KAIT	2016-11-01 08:58:00	3.079	2016-11-01	21:58:00				175	KAIT	2016-12-26 18:00:00	2.268	2016-12-27	07:00:00
176	KAIT	2016-11-01 08:59:00	3.057	2016-11-01	21:59:00				176	KAIT	2016-12-26 18:01:00	2.255	2016-12-27	07:01:00
177	KAIT	2016-11-01 09:00:00	3.045	2016-11-01	22:00:00				177	KAIT	2016-12-26 18:02:00	2.257	2016-12-27	07:02:00
178	KAIT	2016-11-01 09:01:00	3.063	2016-11-01	22:01:00				178	KAIT	2016-12-26 18:03:00	2.237	2016-12-27	07:03:00
179	KAIT	2016-11-01 09:02:00	3.037	2016-11-01	22:02:00				179	KAIT	2016-12-26 18:04:00	2.217	2016-12-27	07:04:00
180	KAIT	2016-11-01 09:03:00	3.062	2016-11-01	22:03:00				180	KAIT	2016-12-26 18:05:00	2.207	2016-12-27	07:05:00
181	KAIT	2016-11-01 09:04:00	3.051	2016-11-01	22:04:00				181	KAIT	2016-12-26 18:06:00	2.202	2016-12-27	07:06:00
182	KAIT	2016-11-01 09:05:00	3.045	2016-11-01	22:05:00				182	KAIT	2016-12-26 18:07:00	2.193	2016-12-27	07:07:00
183	KAIT	2016-11-01 09:06:00	3.003	2016-11-01	22:06:00				183	KAIT	2016-12-26 18:08:00	2.189	2016-12-27	07:08:00
184	KAIT	2016-11-01 09:07:00	3.035	2016-11-01	22:07:00				184	KAIT	2016-12-26 18:09:00	2.188	2016-12-27	07:09:00
185	KAIT	2016-11-01 09:08:00	3.017	2016-11-01	22:08:00				185	KAIT	2016-12-26 18:10:00	2.185	2016-12-27	07:10:00
186	KAIT	2016-11-01 09:09:00	3.043	2016-11-01	22:09:00				186	KAIT	2016-12-26 18:11:00	2.173	2016-12-27	07:11:00
187	KAIT	2016-11-01 09:10:00	3.029	2016-11-01	22:10:00				187	KAIT	2016-12-26 18:12:00	2.167	2016-12-27	07:12:00	HT 0.52
188	KAIT	2016-11-01 09:11:00	3.032	2016-11-01	22:11:00				188	KAIT	2016-12-26 18:13:00	2.17	2016-12-27	07:13:00
189	KAIT	2016-11-01 09:12:00	3.052	2016-11-01	22:12:00				189	KAIT	2016-12-26 18:14:00	2.173	2016-12-27	07:14:00
190	KAIT	2016-11-01 09:13:00	3.004	2016-11-01	22:13:00				190	KAIT	2016-12-26 18:15:00	2.189	2016-12-27	07:15:00
191	KAIT	2016-11-01 09:14:00	3.017	2016-11-01	22:14:00				191	KAIT	2016-12-26 18:16:00	2.191	2016-12-27	07:16:00
192	KAIT	2016-11-01 09:15:00	3.006	2016-11-01	22:15:00				192	KAIT	2016-12-26 18:17:00	2.201	2016-12-27	07:17:00
193	KAIT	2016-11-01 09:16:00	2.994	2016-11-01	22:16:00				193	KAIT	2016-12-26 18:18:00	2.186	2016-12-27	07:18:00
194	KAIT	2016-11-01 09:17:00	3.004	2016-11-01	22:17:00				194	KAIT	2016-12-26 18:19:00	2.181	2016-12-27	07:19:00
195	KAIT	2016-11-01 09:18:00	2.981	2016-11-01	22:18:00				195	KAIT	2016-12-26 18:20:00	2.173	2016-12-27	07:20:00
196	KAIT	2016-11-01 09:19:00	2.981	2016-11-01	22:19:00				196	KAIT	2016-12-26 18:21:00	2.165	2016-12-27	07:21:00
197	KAIT	2016-11-01 09:20:00	2.963	2016-11-01	22:20:00				197	KAIT	2016-12-26 18:22:00	2.148	2016-12-27	07:22:00
198	KAIT	2016-11-01 09:21:00	2.997	2016-11-01	22:21:00				198	KAIT	2016-12-26 18:23:00	2.142	2016-12-27	07:23:00
199	KAIT	2016-11-01 09:22:00	2.942	2016-11-01	22:22:00				199	KAIT	2016-12-26 18:24:00	2.147	2016-12-27	07:24:00
200	KAIT	2016-11-01 09:23:00	2.978	2016-11-01	22:23:00				200	KAIT	2016-12-26 18:25:00	2.143	2016-12-27	07:25:00
201	KAIT	2016-11-01 09:24:00	2.978	2016-11-01	22:24:00				201	KAIT	2016-12-26 18:26:00	2.147	2016-12-27	07:26:00
202	KAIT	2016-11-01 09:25:00	2.935	2016-11-01	22:25:00				202	KAIT	2016-12-26 18:27:00	2.137	2016-12-27	07:27:00
203	KAIT	2016-11-01 09:26:00	2.966	2016-11-01	22:26:00				203	KAIT	2016-12-26 18:28:00	2.126	2016-12-27	07:28:00
204	KAIT	2016-11-01 09:27:00	2.943	2016-11-01	22:27:00				204	KAIT	2016-12-26 18:29:00	2.124	2016-12-27	07:29:00
205	KAIT	2016-11-01 09:28:00	2.93	2016-11-01	22:28:00				205	KAIT	2016-12-26 18:30:00	2.111	2016-12-27	07:30:00
206	KAIT	2016-11-01 09:29:00	2.919	2016-11-01	22:29:00				206	KAIT	2016-12-26 18:31:00	2.109	2016-12-27	07:31:00
207	KAIT	2016-11-01 09:30:00	2.919	2016-11-01	22:30:00				207	KAIT	2016-12-26 18:32:00	2.095	2016-12-27	07:32:00
208	KAIT	2016-11-01 09:31:00	2.895	2016-11-01	22:31:00				208	KAIT	2016-12-26 18:33:00	2.1	2016-12-27	07:33:00
209	KAIT	2016-11-01 09:32:00	2.935	2016-11-01	22:32:00				209	KAIT	2016-12-26 18:34:00	2.088	2016-12-27	07:34:00
210	KAIT	2016-11-01 09:33:00	2.947	2016-11-01	22:33:00				210	KAIT	2016-12-26 18:35:00	2.088	2016-12-27	07:35:00
211	KAIT	2016-11-01 09:34:00	2.922	2016-11-01	22:34:00				211	KAIT	2016-12-26 18:36:00	2.093	2016-12-27	07:36:00
212	KAIT	2016-11-01 09:35:00	2.908	2016-11-01	22:35:00				212	KAIT	2016-12-26 18:37:00	2.086	2016-12-27	07:37:00
213	KAIT	2016-11-01 09:36:00	2.883	2016-11-01	22:36:00				213	KAIT	2016-12-26 18:38:00	2.074	2016-12-27	07:38:00
214	KAIT	2016-11-01 09:37:00	2.896	2016-11-01	22:37:00				214	KAIT	2016-12-26 18:39:00	2.073	2016-12-27	07:39:00
215	KAIT	2016-11-01 09:38:00	2.876	2016-11-01	22:38:00				215	KAIT	2016-12-26 18:40:00	2.065	2016-12-27	07:40:00
216	KAIT	2016-11-01 09:39:00	2.931	2016-11-01	22:39:00				216	KAIT	2016-12-26 18:41:00	2.05	2016-12-27	07:41:00
217	KAIT	2016-11-01 09:40:00	2.85	2016-11-01	22:40:00				217	KAIT	2016-12-26 18:42:00	2.043	2016-12-27	07:42:00
218	KAIT	2016-11-01 09:41:00	2.889	2016-11-01	22:41:00				218	KAIT	2016-12-26 18:43:00	2.029	2016-12-27	07:43:00
219	KAIT	2016-11-01 09:42:00	2.863	2016-11-01	22:42:00				219	KAIT	2016-12-26 18:44:00	2.033	2016-12-27	07:44:00
220	KAIT	2016-11-01 09:43:00	2.874	2016-11-01	22:43:00				220	KAIT	2016-12-26 18:45:00	2.021	2016-12-27	07:45:00
221	KAIT	2016-11-01 09:44:00	2.862	2016-11-01	22:44:00				221	KAIT	2016-12-26 18:46:00	2.013	2016-12-27	07:46:00
222	KAIT	2016-11-01 09:45:00	2.827	2016-11-01	22:45:00				222	KAIT	2016-12-26 18:47:00	2.008	2016-12-27	07:47:00
223	KAIT	2016-11-01 09:46:00	2.877	2016-11-01	22:46:00				223	KAIT	2016-12-26 18:48:00	1.999	2016-12-27	07:48:00
224	KAIT	2016-11-01 09:47:00	2.846	2016-11-01	22:47:00				224	KAIT	2016-12-26 18:49:00	2	2016-12-27	07:49:00
225	KAIT	2016-11-01 09:48:00	2.833	2016-11-01	22:48:00				225	KAIT	2016-12-26 18:50:00	2.003	2016-12-27	07:50:00
226	KAIT	2016-11-01 09:49:00	2.86	2016-11-01	22:49:00				226	KAIT	2016-12-26 18:51:00	2.008	2016-12-27	07:51:00
227	KAIT	2016-11-01 09:50:00	2.827	2016-11-01	22:50:00				227	KAIT	2016-12-26 18:52:00	2.018	2016-12-27	07:52:00
228	KAIT	2016-11-01 09:51:00	2.853	2016-11-01	22:51:00				228	KAIT	2016-12-26 18:53:00	2.024	2016-12-27	07:53:00
229	KAIT	2016-11-01 09:52:00	2.797	2016-11-01	22:52:00				229	KAIT	2016-12-26 18:54:00	2.013	2016-12-27	07:54:00
230	KAIT	2016-11-01 09:53:00	2.84	2016-11-01	22:53:00				230	KAIT	2016-12-26 18:55:00	2.02	2016-12-27	07:55:00
231	KAIT	2016-11-01 09:54:00	2.813	2016-11-01	22:54:00				231	KAIT	2016-12-26 18:56:00	2.013	2016-12-27	07:56:00
232	KAIT	2016-11-01 09:55:00	2.829	2016-11-01	22:55:00				232	KAIT	2016-12-26 18:57:00	2.001	2016-12-27	07:57:00
233	KAIT	2016-11-01 09:56:00	2.803	2016-11-01	22:56:00				233	KAIT	2016-12-26 18:58:00	1.988	2016-12-27	07:58:00
234	KAIT	2016-11-01 09:57:00	2.83	2016-11-01	22:57:00				234	KAIT	2016-12-26 18:59:00	1.975	2016-12-27	07:59:00
235	KAIT	2016-11-01 09:58:00	2.788	2016-11-01	22:58:00				235	KAIT	2016-12-26 19:00:00	1.962	2016-12-27	08:00:00
236	KAIT	2016-11-01 09:59:00	2.808	2016-11-01	22:59:00				236	KAIT	2016-12-26 19:01:00	1.942	2016-12-27	08:01:00
237	KAIT	2016-11-01 10:00:00	2.803	2016-11-01	23:00:00				237	KAIT	2016-12-26 19:02:00	1.956	2016-12-27	08:02:00
238	KAIT	2016-11-01 10:01:00	2.778	2016-11-01	23:01:00				238	KAIT	2016-12-26 19:03:00	1.946	2016-12-27	08:03:00
239	KAIT	2016-11-01 10:02:00	2.788	2016-11-01	23:02:00				239	KAIT	2016-12-26 19:04:00	1.955	2016-12-27	08:04:00
240	KAIT	2016-11-01 10:03:00	2.786	2016-11-01	23:03:00				240	KAIT	2016-12-26 19:05:00	1.961	2016-12-27	08:05:00
241	KAIT	2016-11-01 10:04:00	2.777	2016-11-01	23:04:00				241	KAIT	2016-12-26 19:06:00	1.961	2016-12-27	08:06:00
242	KAIT	2016-11-01 10:05:00	2.784	2016-11-01	23:05:00				242	KAIT	2016-12-26 19:07:00	1.952	2016-12-27	08:07:00
243	KAIT	2016-11-01 10:06:00	2.755	2016-11-01	23:06:00				243	KAIT	2016-12-26 19:08:00	1.944	2016-12-27	08:08:00
244	KAIT	2016-11-01 10:07:00	2.792	2016-11-01	23:07:00				244	KAIT	2016-12-26 19:09:00	1.929	2016-12-27	08:09:00
245	KAIT	2016-11-01 10:08:00	2.782	2016-11-01	23:08:00				245	KAIT	2016-12-26 19:10:00	1.916	2016-12-27	08:10:00
246	KAIT	2016-11-01 10:09:00	2.775	2016-11-01	23:09:00				246	KAIT	2016-12-26 19:11:00	1.916	2016-12-27	08:11:00
247	KAIT	2016-11-01 10:10:00	2.729	2016-11-01	23:10:00				247	KAIT	2016-12-26 19:12:00	1.905	2016-12-27	08:12:00
248	KAIT	2016-11-01 10:11:00	2.755	2016-11-01	23:11:00				248	KAIT	2016-12-26 19:13:00	1.919	2016-12-27	08:13:00
249	KAIT	2016-11-01 10:12:00	2.741	2016-11-01	23:12:00				249	KAIT	2016-12-26 19:14:00	1.918	2016-12-27	08:14:00
250	KAIT	2016-11-01 10:13:00	2.758	2016-11-01	23:13:00				250	KAIT	2016-12-26 19:15:00	1.913	2016-12-27	08:15:00
251	KAIT	2016-11-01 10:14:00	2.732	2016-11-01	23:14:00				251	KAIT	2016-12-26 19:16:00	1.905	2016-12-27	08:16:00
252	KAIT	2016-11-01 10:15:00	2.695	2016-11-01	23:15:00				252	KAIT	2016-12-26 19:17:00	1.9	2016-12-27	08:17:00
253	KAIT	2016-11-01 10:16:00	2.73	2016-11-01	23:16:00				253	KAIT	2016-12-26 19:18:00	1.886	2016-12-27	08:18:00
254	KAIT	2016-11-01 10:17:00	2.716	2016-11-01	23:17:00				254	KAIT	2016-12-26 19:19:00	1.877	2016-12-27	08:19:00
255	KAIT	2016-11-01 10:18:00	2.712	2016-11-01	23:18:00				255	KAIT	2016-12-26 19:20:00	1.88	2016-12-27	08:20:00
256	KAIT	2016-11-01 10:19:00	2.686	2016-11-01	23:19:00				256	KAIT	2016-12-26 19:21:00	1.875	2016-12-27	08:21:00
257	KAIT	2016-11-01 10:20:00	2.702	2016-11-01	23:20:00				257	KAIT	2016-12-26 19:22:00	1.876	2016-12-27	08:22:00
258	KAIT	2016-11-01 10:21:00	2.729	2016-11-01	23:21:00				258	KAIT	2016-12-26 19:23:00	1.872	2016-12-27	08:23:00
259	KAIT	2016-11-01 10:22:00	2.703	2016-11-01	23:22:00				259	KAIT	2016-12-26 19:24:00	1.881	2016-12-27	08:24:00
260	KAIT	2016-11-01 10:23:00	2.713	2016-11-01	23:23:00				260	KAIT	2016-12-26 19:25:00	1.888	2016-12-27	08:25:00
261	KAIT	2016-11-01 10:24:00	2.691	2016-11-01	23:24:00				261	KAIT	2016-12-26 19:26:00	1.885	2016-12-27	08:26:00
262	KAIT	2016-11-01 10:25:00	2.688	2016-11-01	23:25:00				262	KAIT	2016-12-26 19:27:00	1.891	2016-12-27	08:27:00
263	KAIT	2016-11-01 10:26:00	2.669	2016-11-01	23:26:00				263	KAIT	2016-12-26 19:28:00	1.901	2016-12-27	08:28:00
264	KAIT	2016-11-01 10:27:00	2.674	2016-11-01	23:27:00				264	KAIT	2016-12-26 19:29:00	1.898	2016-12-27	08:29:00
265	KAIT	2016-11-01 10:28:00	2.671	2016-11-01	23:28:00				265	KAIT	2016-12-26 19:30:00	1.885	2016-12-27	08:30:00
266	KAIT	2016-11-01 10:29:00	2.661	2016-11-01	23:29:00				266	KAIT	2016-12-26 19:31:00	1.872	2016-12-27	08:31:00
267	KAIT	2016-11-01 10:30:00	2.68	2016-11-01	23:30:00				267	KAIT	2016-12-26 19:32:00	1.859	2016-12-27	08:32:00
268	KAIT	2016-11-01 10:31:00	2.674	2016-11-01	23:31:00				268	KAIT	2016-12-26 19:33:00	1.859	2016-12-27	08:33:00
269	KAIT	2016-11-01 10:32:00	2.662	2016-11-01	23:32:00				269	KAIT	2016-12-26 19:34:00	1.845	2016-12-27	08:34:00
270	KAIT	2016-11-01 10:33:00	2.647	2016-11-01	23:33:00				270	KAIT	2016-12-26 19:35:00	1.841	2016-12-27	08:35:00
271	KAIT	2016-11-01 10:34:00	2.689	2016-11-01	23:34:00				271	KAIT	2016-12-26 19:36:00	1.823	2016-12-27	08:36:00
272	KAIT	2016-11-01 10:35:00	2.662	2016-11-01	23:35:00				272	KAIT	2016-12-26 19:37:00	1.817	2016-12-27	08:37:00
273	KAIT	2016-11-01 10:36:00	2.654	2016-11-01	23:36:00				273	KAIT	2016-12-26 19:38:00	1.826	2016-12-27	08:38:00
274	KAIT	2016-11-01 10:37:00	2.674	2016-11-01	23:37:00				274	KAIT	2016-12-26 19:39:00	1.824	2016-12-27	08:39:00
275	KAIT	2016-11-01 10:38:00	2.636	2016-11-01	23:38:00				275	KAIT	2016-12-26 19:40:00	1.817	2016-12-27	08:40:00
276	KAIT	2016-11-01 10:39:00	2.645	2016-11-01	23:39:00				276	KAIT	2016-12-26 19:41:00	1.826	2016-12-27	08:41:00
277	KAIT	2016-11-01 10:40:00	2.648	2016-11-01	23:40:00				277	KAIT	2016-12-26 19:42:00	1.834	2016-12-27	08:42:00
278	KAIT	2016-11-01 10:41:00	2.621	2016-11-01	23:41:00				278	KAIT	2016-12-26 19:43:00	1.825	2016-12-27	08:43:00
279	KAIT	2016-11-01 10:42:00	2.645	2016-11-01	23:42:00				279	KAIT	2016-12-26 19:44:00	1.815	2016-12-27	08:44:00
280	KAIT	2016-11-01 10:43:00	2.61	2016-11-01	23:43:00				280	KAIT	2016-12-26 19:45:00	1.793	2016-12-27	08:45:00
281	KAIT	2016-11-01 10:44:00	2.613	2016-11-01	23:44:00				281	KAIT	2016-12-26 19:46:00	1.788	2016-12-27	08:46:00
282	KAIT	2016-11-01 10:45:00	2.629	2016-11-01	23:45:00				282	KAIT	2016-12-26 19:47:00	1.788	2016-12-27	08:47:00
283	KAIT	2016-11-01 10:46:00	2.602	2016-11-01	23:46:00				283	KAIT	2016-12-26 19:48:00	1.791	2016-12-27	08:48:00
284	KAIT	2016-11-01 10:47:00	2.618	2016-11-01	23:47:00				284	KAIT	2016-12-26 19:49:00	1.801	2016-12-27	08:49:00
285	KAIT	2016-11-01 10:48:00	2.594	2016-11-01	23:48:00				285	KAIT	2016-12-26 19:50:00	1.799	2016-12-27	08:50:00
286	KAIT	2016-11-01 10:49:00	2.59	2016-11-01	23:49:00				286	KAIT	2016-12-26 19:51:00	1.796	2016-12-27	08:51:00
287	KAIT	2016-11-01 10:50:00	2.564	2016-11-01	23:50:00				287	KAIT	2016-12-26 19:52:00	1.808	2016-12-27	08:52:00
288	KAIT	2016-11-01 10:51:00	2.589	2016-11-01	23:51:00				288	KAIT	2016-12-26 19:53:00	1.818	2016-12-27	08:53:00
289	KAIT	2016-11-01 10:52:00	2.607	2016-11-01	23:52:00				289	KAIT	2016-12-26 19:54:00	1.814	2016-12-27	08:54:00
290	KAIT	2016-11-01 10:53:00	2.603	2016-11-01	23:53:00				290	KAIT	2016-12-26 19:55:00	1.805	2016-12-27	08:55:00
291	KAIT	2016-11-01 10:54:00	2.592	2016-11-01	23:54:00				291	KAIT	2016-12-26 19:56:00	1.79	2016-12-27	08:56:00
292	KAIT	2016-11-01 10:55:00	2.602	2016-11-01	23:55:00				292	KAIT	2016-12-26 19:57:00	1.806	2016-12-27	08:57:00
293	KAIT	2016-11-01 10:56:00	2.532	2016-11-01	23:56:00				293	KAIT	2016-12-26 19:58:00	1.782	2016-12-27	08:58:00
294	KAIT	2016-11-01 10:57:00	2.568	2016-11-01	23:57:00				294	KAIT	2016-12-26 19:59:00	1.784	2016-12-27	08:59:00
295	KAIT	2016-11-01 10:58:00	2.547	2016-11-01	23:58:00				295	KAIT	2016-12-26 20:00:00	1.77	2016-12-27	09:00:00
296	KAIT	2016-11-01 10:59:00	2.569	2016-11-01	23:59:00				296	KAIT	2016-12-26 20:01:00	1.785	2016-12-27	09:01:00
297	KAIT	2016-11-01 11:00:00	2.564	2016-11-02	1900-01-01				297	KAIT	2016-12-26 20:02:00	1.781	2016-12-27	09:02:00
298	KAIT	2016-11-01 11:01:00	2.559	2016-11-02	00:01:00				298	KAIT	2016-12-26 20:03:00	1.78	2016-12-27	09:03:00
299	KAIT	2016-11-01 11:02:00	2.558	2016-11-02	00:02:00				299	KAIT	2016-12-26 20:04:00	1.778	2016-12-27	09:04:00
300	KAIT	2016-11-01 11:03:00	2.538	2016-11-02	00:03:00				300	KAIT	2016-12-26 20:05:00	1.784	2016-12-27	09:05:00
301	KAIT	2016-11-01 11:04:00	2.561	2016-11-02	00:04:00				301	KAIT	2016-12-26 20:06:00	1.754	2016-12-27	09:06:00
302	KAIT	2016-11-01 11:05:00	2.51	2016-11-02	00:05:00				302	KAIT	2016-12-26 20:07:00	1.749	2016-12-27	09:07:00
303	KAIT	2016-11-01 11:06:00	2.572	2016-11-02	00:06:00				303	KAIT	2016-12-26 20:08:00	1.753	2016-12-27	09:08:00
304	KAIT	2016-11-01 11:07:00	2.548	2016-11-02	00:07:00				304	KAIT	2016-12-26 20:09:00	1.745	2016-12-27	09:09:00
305	KAIT	2016-11-01 11:08:00	2.512	2016-11-02	00:08:00				305	KAIT	2016-12-26 20:10:00	1.745	2016-12-27	09:10:00
306	KAIT	2016-11-01 11:09:00	2.531	2016-11-02	00:09:00				306	KAIT	2016-12-26 20:11:00	1.761	2016-12-27	09:11:00
307	KAIT	2016-11-01 11:10:00	2.52	2016-11-02	00:10:00				307	KAIT	2016-12-26 20:12:00	1.747	2016-12-27	09:12:00
308	KAIT	2016-11-01 11:11:00	2.518	2016-11-02	00:11:00				308	KAIT	2016-12-26 20:13:00	1.751	2016-12-27	09:13:00
309	KAIT	2016-11-01 11:12:00	2.548	2016-11-02	00:12:00				309	KAIT	2016-12-26 20:14:00	1.733	2016-12-27	09:14:00
310	KAIT	2016-11-01 11:13:00	2.53	2016-11-02	00:13:00				310	KAIT	2016-12-26 20:15:00	1.735	2016-12-27	09:15:00
311	KAIT	2016-11-01 11:14:00	2.522	2016-11-02	00:14:00				311	KAIT	2016-12-26 20:16:00	1.719	2016-12-27	09:16:00
312	KAIT	2016-11-01 11:15:00	2.555	2016-11-02	00:15:00				312	KAIT	2016-12-26 20:17:00	1.709	2016-12-27	09:17:00
313	KAIT	2016-11-01 11:16:00	2.523	2016-11-02	00:16:00				313	KAIT	2016-12-26 20:18:00	1.703	2016-12-27	09:18:00
314	KAIT	2016-11-01 11:17:00	2.547	2016-11-02	00:17:00				314	KAIT	2016-12-26 20:19:00	1.7	2016-12-27	09:19:00
315	KAIT	2016-11-01 11:18:00	2.526	2016-11-02	00:18:00				315	KAIT	2016-12-26 20:20:00	1.716	2016-12-27	09:20:00
316	KAIT	2016-11-01 11:19:00	2.513	2016-11-02	00:19:00				316	KAIT	2016-12-26 20:21:00	1.712	2016-12-27	09:21:00
317	KAIT	2016-11-01 11:20:00	2.523	2016-11-02	00:20:00				317	KAIT	2016-12-26 20:22:00	1.713	2016-12-27	09:22:00
318	KAIT	2016-11-01 11:21:00	2.476	2016-11-02	00:21:00				318	KAIT	2016-12-26 20:23:00	1.702	2016-12-27	09:23:00
319	KAIT	2016-11-01 11:22:00	2.551	2016-11-02	00:22:00				319	KAIT	2016-12-26 20:24:00	1.715	2016-12-27	09:24:00
320	KAIT	2016-11-01 11:23:00	2.517	2016-11-02	00:23:00				320	KAIT	2016-12-26 20:25:00	1.711	2016-12-27	09:25:00
321	KAIT	2016-11-01 11:24:00	2.51	2016-11-02	00:24:00				321	KAIT	2016-12-26 20:26:00	1.693	2016-12-27	09:26:00
322	KAIT	2016-11-01 11:25:00	2.502	2016-11-02	00:25:00				322	KAIT	2016-12-26 20:27:00	1.701	2016-12-27	09:27:00
323	KAIT	2016-11-01 11:26:00	2.471	2016-11-02	00:26:00				323	KAIT	2016-12-26 20:28:00	1.703	2016-12-27	09:28:00
324	KAIT	2016-11-01 11:27:00	2.492	2016-11-02	00:27:00				324	KAIT	2016-12-26 20:29:00	1.716	2016-12-27	09:29:00
325	KAIT	2016-11-01 11:28:00	2.497	2016-11-02	00:28:00				325	KAIT	2016-12-26 20:30:00	1.701	2016-12-27	09:30:00
326	KAIT	2016-11-01 11:29:00	2.498	2016-11-02	00:29:00				326	KAIT	2016-12-26 20:31:00	1.694	2016-12-27	09:31:00
327	KAIT	2016-11-01 11:30:00	2.511	2016-11-02	00:30:00				327	KAIT	2016-12-26 20:32:00	1.706	2016-12-27	09:32:00
328	KAIT	2016-11-01 11:31:00	2.486	2016-11-02	00:31:00				328	KAIT	2016-12-26 20:33:00	1.71	2016-12-27	09:33:00
329	KAIT	2016-11-01 11:32:00	2.507	2016-11-02	00:32:00				329	KAIT	2016-12-26 20:34:00	1.706	2016-12-27	09:34:00
330	KAIT	2016-11-01 11:33:00	2.462	2016-11-02	00:33:00				330	KAIT	2016-12-26 20:35:00	1.702	2016-12-27	09:35:00
331	KAIT	2016-11-01 11:34:00	2.455	2016-11-02	00:34:00				331	KAIT	2016-12-26 20:36:00	1.698	2016-12-27	09:36:00
332	KAIT	2016-11-01 11:35:00	2.473	2016-11-02	00:35:00				332	KAIT	2016-12-26 20:37:00	1.701	2016-12-27	09:37:00
333	KAIT	2016-11-01 11:36:00	2.493	2016-11-02	00:36:00				333	KAIT	2016-12-26 20:38:00	1.701	2016-12-27	09:38:00
334	KAIT	2016-11-01 11:37:00	2.5	2016-11-02	00:37:00				334	KAIT	2016-12-26 20:39:00	1.699	2016-12-27	09:39:00
335	KAIT	2016-11-01 11:38:00	2.444	2016-11-02	00:38:00				335	KAIT	2016-12-26 20:40:00	1.695	2016-12-27	09:40:00
336	KAIT	2016-11-01 11:39:00	2.488	2016-11-02	00:39:00				336	KAIT	2016-12-26 20:41:00	1.703	2016-12-27	09:41:00
337	KAIT	2016-11-01 11:40:00	2.5	2016-11-02	00:40:00				337	KAIT	2016-12-26 20:42:00	1.708	2016-12-27	09:42:00
338	KAIT	2016-11-01 11:41:00	2.476	2016-11-02	00:41:00				338	KAIT	2016-12-26 20:43:00	1.709	2016-12-27	09:43:00
339	KAIT	2016-11-01 11:42:00	2.482	2016-11-02	00:42:00				339	KAIT	2016-12-26 20:44:00	1.712	2016-12-27	09:44:00
340	KAIT	2016-11-01 11:43:00	2.458	2016-11-02	00:43:00				340	KAIT	2016-12-26 20:45:00	1.698	2016-12-27	09:45:00
341	KAIT	2016-11-01 11:44:00	2.49	2016-11-02	00:44:00				341	KAIT	2016-12-26 20:46:00	1.686	2016-12-27	09:46:00
342	KAIT	2016-11-01 11:45:00	2.49	2016-11-02	00:45:00				342	KAIT	2016-12-26 20:47:00	1.681	2016-12-27	09:47:00
343	KAIT	2016-11-01 11:46:00	2.45	2016-11-02	00:46:00				343	KAIT	2016-12-26 20:48:00	1.67	2016-12-27	09:48:00
344	KAIT	2016-11-01 11:47:00	2.487	2016-11-02	00:47:00				344	KAIT	2016-12-26 20:49:00	1.67	2016-12-27	09:49:00
345	KAIT	2016-11-01 11:48:00	2.48	2016-11-02	00:48:00				345	KAIT	2016-12-26 20:50:00	1.658	2016-12-27	09:50:00
346	KAIT	2016-11-01 11:49:00	2.49	2016-11-02	00:49:00				346	KAIT	2016-12-26 20:51:00	1.658	2016-12-27	09:51:00
347	KAIT	2016-11-01 11:50:00	2.482	2016-11-02	00:50:00				347	KAIT	2016-12-26 20:52:00	1.662	2016-12-27	09:52:00
348	KAIT	2016-11-01 11:51:00	2.5	2016-11-02	00:51:00				348	KAIT	2016-12-26 20:53:00	1.658	2016-12-27	09:53:00
349	KAIT	2016-11-01 11:52:00	2.489	2016-11-02	00:52:00				349	KAIT	2016-12-26 20:54:00	1.656	2016-12-27	09:54:00
350	KAIT	2016-11-01 11:53:00	2.46	2016-11-02	00:53:00				350	KAIT	2016-12-26 20:55:00	1.662	2016-12-27	09:55:00
351	KAIT	2016-11-01 11:54:00	2.495	2016-11-02	00:54:00				351	KAIT	2016-12-26 20:56:00	1.659	2016-12-27	09:56:00
352	KAIT	2016-11-01 11:55:00	2.47	2016-11-02	00:55:00				352	KAIT	2016-12-26 20:57:00	1.655	2016-12-27	09:57:00
353	KAIT	2016-11-01 11:56:00	2.49	2016-11-02	00:56:00				353	KAIT	2016-12-26 20:58:00	1.652	2016-12-27	09:58:00
354	KAIT	2016-11-01 11:57:00	2.457	2016-11-02	00:57:00				354	KAIT	2016-12-26 20:59:00	1.65	2016-12-27	09:59:00
355	KAIT	2016-11-01 11:58:00	2.493	2016-11-02	00:58:00				355	KAIT	2016-12-26 21:00:00	1.655	2016-12-27	10:00:00
356	KAIT	2016-11-01 11:59:00	2.455	2016-11-02	00:59:00				356	KAIT	2016-12-26 21:01:00	1.654	2016-12-27	10:01:00
357	KAIT	2016-11-01 12:00:00	2.497	2016-11-02	01:00:00				357	KAIT	2016-12-26 21:02:00	1.653	2016-12-27	10:02:00
358	KAIT	2016-11-01 12:01:00	2.455	2016-11-02	01:01:00				358	KAIT	2016-12-26 21:03:00	1.647	2016-12-27	10:03:00
359	KAIT	2016-11-01 12:02:00	2.475	2016-11-02	01:02:00				359	KAIT	2016-12-26 21:04:00	1.651	2016-12-27	10:04:00
360	KAIT	2016-11-01 12:03:00	2.501	2016-11-02	01:03:00				360	KAIT	2016-12-26 21:05:00	1.639	2016-12-27	10:05:00
361	KAIT	2016-11-01 12:04:00	2.467	2016-11-02	01:04:00				361	KAIT	2016-12-26 21:06:00	1.629	2016-12-27	10:06:00
362	KAIT	2016-11-01 12:05:00	2.489	2016-11-02	01:05:00				362	KAIT	2016-12-26 21:07:00	1.631	2016-12-27	10:07:00
363	KAIT	2016-11-01 12:06:00	2.507	2016-11-02	01:06:00				363	KAIT	2016-12-26 21:08:00	1.63	2016-12-27	10:08:00
364	KAIT	2016-11-01 12:07:00	2.49	2016-11-02	01:07:00				364	KAIT	2016-12-26 21:09:00	1.622	2016-12-27	10:09:00
365	KAIT	2016-11-01 12:08:00	2.453	2016-11-02	01:08:00				365	KAIT	2016-12-26 21:10:00	1.625	2016-12-27	10:10:00
366	KAIT	2016-11-01 12:09:00	2.476	2016-11-02	01:09:00				366	KAIT	2016-12-26 21:11:00	1.639	2016-12-27	10:11:00
367	KAIT	2016-11-01 12:10:00	2.463	2016-11-02	01:10:00				367	KAIT	2016-12-26 21:12:00	1.654	2016-12-27	10:12:00
368	KAIT	2016-11-01 12:11:00	2.446	2016-11-02	01:11:00				368	KAIT	2016-12-26 21:13:00	1.655	2016-12-27	10:13:00
369	KAIT	2016-11-01 12:12:00	2.467	2016-11-02	01:12:00				369	KAIT	2016-12-26 21:14:00	1.662	2016-12-27	10:14:00
370	KAIT	2016-11-01 12:13:00	2.484	2016-11-02	01:13:00	LT 0.5			370	KAIT	2016-12-26 21:15:00	1.658	2016-12-27	10:15:00
371	KAIT	2016-11-01 12:14:00	2.474	2016-11-02	01:14:00				371	KAIT	2016-12-26 21:16:00	1.666	2016-12-27	10:16:00
372	KAIT	2016-11-01 12:15:00	2.465	2016-11-02	01:15:00				372	KAIT	2016-12-26 21:17:00	1.659	2016-12-27	10:17:00
373	KAIT	2016-11-01 12:16:00	2.466	2016-11-02	01:16:00				373	KAIT	2016-12-26 21:18:00	1.65	2016-12-27	10:18:00
374	KAIT	2016-11-01 12:17:00	2.419	2016-11-02	01:17:00				374	KAIT	2016-12-26 21:19:00	1.643	2016-12-27	10:19:00
375	KAIT	2016-11-01 12:18:00	2.49	2016-11-02	01:18:00				375	KAIT	2016-12-26 21:20:00	1.645	2016-12-27	10:20:00
376	KAIT	2016-11-01 12:19:00	2.479	2016-11-02	01:19:00				376	KAIT	2016-12-26 21:21:00	1.644	2016-12-27	10:21:00
377	KAIT	2016-11-01 12:20:00	2.485	2016-11-02	01:20:00				377	KAIT	2016-12-26 21:22:00	1.633	2016-12-27	10:22:00
378	KAIT	2016-11-01 12:21:00	2.48	2016-11-02	01:21:00				378	KAIT	2016-12-26 21:23:00	1.629	2016-12-27	10:23:00
379	KAIT	2016-11-01 12:22:00	2.471	2016-11-02	01:22:00				379	KAIT	2016-12-26 21:24:00	1.641	2016-12-27	10:24:00
380	KAIT	2016-11-01 12:23:00	2.496	2016-11-02	01:23:00				380	KAIT	2016-12-26 21:25:00	1.649	2016-12-27	10:25:00
381	KAIT	2016-11-01 12:24:00	2.476	2016-11-02	01:24:00				381	KAIT	2016-12-26 21:26:00	1.65	2016-12-27	10:26:00
382	KAIT	2016-11-01 12:25:00	2.486	2016-11-02	01:25:00				382	KAIT	2016-12-26 21:27:00	1.641	2016-12-27	10:27:00
383	KAIT	2016-11-01 12:26:00	2.478	2016-11-02	01:26:00				383	KAIT	2016-12-26 21:28:00	1.647	2016-12-27	10:28:00
384	KAIT	2016-11-01 12:27:00	2.506	2016-11-02	01:27:00				384	KAIT	2016-12-26 21:29:00	1.635	2016-12-27	10:29:00
385	KAIT	2016-11-01 12:28:00	2.482	2016-11-02	01:28:00				385	KAIT	2016-12-26 21:30:00	1.63	2016-12-27	10:30:00
386	KAIT	2016-11-01 12:29:00	2.482	2016-11-02	01:29:00				386	KAIT	2016-12-26 21:31:00	1.623	2016-12-27	10:31:00
387	KAIT	2016-11-01 12:30:00	2.475	2016-11-02	01:30:00				387	KAIT	2016-12-26 21:32:00	1.61	2016-12-27	10:32:00
388	KAIT	2016-11-01 12:31:00	2.501	2016-11-02	01:31:00				388	KAIT	2016-12-26 21:33:00	1.621	2016-12-27	10:33:00	LT -0.51
389	KAIT	2016-11-01 12:32:00	2.454	2016-11-02	01:32:00				389	KAIT	2016-12-26 21:34:00	1.612	2016-12-27	10:34:00
390	KAIT	2016-11-01 12:33:00	2.481	2016-11-02	01:33:00				390	KAIT	2016-12-26 21:35:00	1.615	2016-12-27	10:35:00
391	KAIT	2016-11-01 12:34:00	2.486	2016-11-02	01:34:00				391	KAIT	2016-12-26 21:36:00	1.607	2016-12-27	10:36:00
392	KAIT	2016-11-01 12:35:00	2.513	2016-11-02	01:35:00				392	KAIT	2016-12-26 21:37:00	1.608	2016-12-27	10:37:00
393	KAIT	2016-11-01 12:36:00	2.517	2016-11-02	01:36:00				393	KAIT	2016-12-26 21:38:00	1.605	2016-12-27	10:38:00
394	KAIT	2016-11-01 12:37:00	2.5	2016-11-02	01:37:00				394	KAIT	2016-12-26 21:39:00	1.624	2016-12-27	10:39:00
395	KAIT	2016-11-01 12:38:00	2.489	2016-11-02	01:38:00				395	KAIT	2016-12-26 21:40:00	1.627	2016-12-27	10:40:00
396	KAIT	2016-11-01 12:39:00	2.506	2016-11-02	01:39:00				396	KAIT	2016-12-26 21:41:00	1.634	2016-12-27	10:41:00
397	KAIT	2016-11-01 12:40:00	2.497	2016-11-02	01:40:00				397	KAIT	2016-12-26 21:42:00	1.638	2016-12-27	10:42:00
398	KAIT	2016-11-01 12:41:00	2.516	2016-11-02	01:41:00				398	KAIT	2016-12-26 21:43:00	1.636	2016-12-27	10:43:00
399	KAIT	2016-11-01 12:42:00	2.5	2016-11-02	01:42:00				399	KAIT	2016-12-26 21:44:00	1.635	2016-12-27	10:44:00
400	KAIT	2016-11-01 12:43:00	2.488	2016-11-02	01:43:00				400	KAIT	2016-12-26 21:45:00	1.641	2016-12-27	10:45:00
401	KAIT	2016-11-01 12:44:00	2.49	2016-11-02	01:44:00				401	KAIT	2016-12-26 21:46:00	1.645	2016-12-27	10:46:00
402	KAIT	2016-11-01 12:45:00	2.486	2016-11-02	01:45:00				402	KAIT	2016-12-26 21:47:00	1.647	2016-12-27	10:47:00
403	KAIT	2016-11-01 12:46:00	2.489	2016-11-02	01:46:00				403	KAIT	2016-12-26 21:48:00	1.645	2016-12-27	10:48:00
404	KAIT	2016-11-01 12:47:00	2.498	2016-11-02	01:47:00				404	KAIT	2016-12-26 21:49:00	1.653	2016-12-27	10:49:00
405	KAIT	2016-11-01 12:48:00	2.524	2016-11-02	01:48:00				405	KAIT	2016-12-26 21:50:00	1.655	2016-12-27	10:50:00
406	KAIT	2016-11-01 12:49:00	2.485	2016-11-02	01:49:00				406	KAIT	2016-12-26 21:51:00	1.664	2016-12-27	10:51:00
407	KAIT	2016-11-01 12:50:00	2.517	2016-11-02	01:50:00				407	KAIT	2016-12-26 21:52:00	1.654	2016-12-27	10:52:00
408	KAIT	2016-11-01 12:51:00	2.488	2016-11-02	01:51:00				408	KAIT	2016-12-26 21:53:00	1.653	2016-12-27	10:53:00
409	KAIT	2016-11-01 12:52:00	2.525	2016-11-02	01:52:00				409	KAIT	2016-12-26 21:54:00	1.649	2016-12-27	10:54:00
410	KAIT	2016-11-01 12:53:00	2.475	2016-11-02	01:53:00				410	KAIT	2016-12-26 21:55:00	1.639	2016-12-27	10:55:00
411	KAIT	2016-11-01 12:54:00	2.523	2016-11-02	01:54:00				411	KAIT	2016-12-26 21:56:00	1.63	2016-12-27	10:56:00
412	KAIT	2016-11-01 12:55:00	2.537	2016-11-02	01:55:00				412	KAIT	2016-12-26 21:57:00	1.625	2016-12-27	10:57:00
413	KAIT	2016-11-01 12:56:00	2.5	2016-11-02	01:56:00				413	KAIT	2016-12-26 21:58:00	1.641	2016-12-27	10:58:00
414	KAIT	2016-11-01 12:57:00	2.522	2016-11-02	01:57:00				414	KAIT	2016-12-26 21:59:00	1.639	2016-12-27	10:59:00
415	KAIT	2016-11-01 12:58:00	2.512	2016-11-02	01:58:00				415	KAIT	2016-12-26 22:00:00	1.64	2016-12-27	11:00:00
416	KAIT	2016-11-01 12:59:00	2.531	2016-11-02	01:59:00				416	KAIT	2016-12-26 22:01:00	1.631	2016-12-27	11:01:00
417	KAIT	2016-11-01 13:00:00	2.505	2016-11-02	02:00:00				417	KAIT	2016-12-26 22:02:00	1.635	2016-12-27	11:02:00
418	KAIT	2016-11-01 13:01:00	2.54	2016-11-02	02:01:00				418	KAIT	2016-12-26 22:03:00	1.635	2016-12-27	11:03:00
419	KAIT	2016-11-01 13:02:00	2.529	2016-11-02	02:02:00				419	KAIT	2016-12-26 22:04:00	1.634	2016-12-27	11:04:00
420	KAIT	2016-11-01 13:03:00	2.529	2016-11-02	02:03:00				420	KAIT	2016-12-26 22:05:00	1.635	2016-12-27	11:05:00
421	KAIT	2016-11-01 13:04:00	2.536	2016-11-02	02:04:00				421	KAIT	2016-12-26 22:06:00	1.629	2016-12-27	11:06:00
422	KAIT	2016-11-01 13:05:00	2.535	2016-11-02	02:05:00				422	KAIT	2016-12-26 22:07:00	1.613	2016-12-27	11:07:00
423	KAIT	2016-11-01 13:06:00	2.551	2016-11-02	02:06:00				423	KAIT	2016-12-26 22:08:00	1.63	2016-12-27	11:08:00
424	KAIT	2016-11-01 13:07:00	2.532	2016-11-02	02:07:00				424	KAIT	2016-12-26 22:09:00	1.626	2016-12-27	11:09:00
425	KAIT	2016-11-01 13:08:00	2.567	2016-11-02	02:08:00				425	KAIT	2016-12-26 22:10:00	1.636	2016-12-27	11:10:00
426	KAIT	2016-11-01 13:09:00	2.525	2016-11-02	02:09:00				426	KAIT	2016-12-26 22:11:00	1.632	2016-12-27	11:11:00
427	KAIT	2016-11-01 13:10:00	2.562	2016-11-02	02:10:00				427	KAIT	2016-12-26 22:12:00	1.643	2016-12-27	11:12:00
428	KAIT	2016-11-01 13:11:00	2.55	2016-11-02	02:11:00				428	KAIT	2016-12-26 22:13:00	1.64	2016-12-27	11:13:00
429	KAIT	2016-11-01 13:12:00	2.548	2016-11-02	02:12:00				429	KAIT	2016-12-26 22:14:00	1.644	2016-12-27	11:14:00
430	KAIT	2016-11-01 13:13:00	2.562	2016-11-02	02:13:00				430	KAIT	2016-12-26 22:15:00	1.653	2016-12-27	11:15:00
431	KAIT	2016-11-01 13:14:00	2.596	2016-11-02	02:14:00				431	KAIT	2016-12-26 22:16:00	1.662	2016-12-27	11:16:00
432	KAIT	2016-11-01 13:15:00	2.564	2016-11-02	02:15:00				432	KAIT	2016-12-26 22:17:00	1.678	2016-12-27	11:17:00
433	KAIT	2016-11-01 13:16:00	2.597	2016-11-02	02:16:00				433	KAIT	2016-12-26 22:18:00	1.669	2016-12-27	11:18:00
434	KAIT	2016-11-01 13:17:00	2.549	2016-11-02	02:17:00				434	KAIT	2016-12-26 22:19:00	1.681	2016-12-27	11:19:00
435	KAIT	2016-11-01 13:18:00	2.561	2016-11-02	02:18:00				435	KAIT	2016-12-26 22:20:00	1.692	2016-12-27	11:20:00
436	KAIT	2016-11-01 13:19:00	2.583	2016-11-02	02:19:00				436	KAIT	2016-12-26 22:21:00	1.69	2016-12-27	11:21:00
437	KAIT	2016-11-01 13:20:00	2.565	2016-11-02	02:20:00				437	KAIT	2016-12-26 22:22:00	1.686	2016-12-27	11:22:00
438	KAIT	2016-11-01 13:21:00	2.549	2016-11-02	02:21:00				438	KAIT	2016-12-26 22:23:00	1.682	2016-12-27	11:23:00
439	KAIT	2016-11-01 13:22:00	2.56	2016-11-02	02:22:00				439	KAIT	2016-12-26 22:24:00	1.684	2016-12-27	11:24:00
440	KAIT	2016-11-01 13:23:00	2.586	2016-11-02	02:23:00				440	KAIT	2016-12-26 22:25:00	1.688	2016-12-27	11:25:00
441	KAIT	2016-11-01 13:24:00	2.586	2016-11-02	02:24:00				441	KAIT	2016-12-26 22:26:00	1.684	2016-12-27	11:26:00
442	KAIT	2016-11-01 13:25:00	2.593	2016-11-02	02:25:00				442	KAIT	2016-12-26 22:27:00	1.68	2016-12-27	11:27:00
443	KAIT	2016-11-01 13:26:00	2.534	2016-11-02	02:26:00				443	KAIT	2016-12-26 22:28:00	1.69	2016-12-27	11:28:00
444	KAIT	2016-11-01 13:27:00	2.606	2016-11-02	02:27:00				444	KAIT	2016-12-26 22:29:00	1.692	2016-12-27	11:29:00
445	KAIT	2016-11-01 13:28:00	2.594	2016-11-02	02:28:00				445	KAIT	2016-12-26 22:30:00	1.677	2016-12-27	11:30:00
446	KAIT	2016-11-01 13:29:00	2.578	2016-11-02	02:29:00				446	KAIT	2016-12-26 22:31:00	1.678	2016-12-27	11:31:00
447	KAIT	2016-11-01 13:30:00	2.605	2016-11-02	02:30:00				447	KAIT	2016-12-26 22:32:00	1.676	2016-12-27	11:32:00
448	KAIT	2016-11-01 13:31:00	2.552	2016-11-02	02:31:00				448	KAIT	2016-12-26 22:33:00	1.666	2016-12-27	11:33:00
449	KAIT	2016-11-01 13:32:00	2.589	2016-11-02	02:32:00				449	KAIT	2016-12-26 22:34:00	1.662	2016-12-27	11:34:00
450	KAIT	2016-11-01 13:33:00	2.581	2016-11-02	02:33:00				450	KAIT	2016-12-26 22:35:00	1.649	2016-12-27	11:35:00
451	KAIT	2016-11-01 13:34:00	2.608	2016-11-02	02:34:00				451	KAIT	2016-12-26 22:36:00	1.658	2016-12-27	11:36:00
452	KAIT	2016-11-01 13:35:00	2.598	2016-11-02	02:35:00				452	KAIT	2016-12-26 22:37:00	1.674	2016-12-27	11:37:00
453	KAIT	2016-11-01 13:36:00	2.625	2016-11-02	02:36:00				453	KAIT	2016-12-26 22:38:00	1.687	2016-12-27	11:38:00
454	KAIT	2016-11-01 13:37:00	2.637	2016-11-02	02:37:00				454	KAIT	2016-12-26 22:39:00	1.698	2016-12-27	11:39:00
455	KAIT	2016-11-01 13:38:00	2.618	2016-11-02	02:38:00				455	KAIT	2016-12-26 22:40:00	1.715	2016-12-27	11:40:00
456	KAIT	2016-11-01 13:39:00	2.64	2016-11-02	02:39:00				456	KAIT	2016-12-26 22:41:00	1.718	2016-12-27	11:41:00
457	KAIT	2016-11-01 13:40:00	2.605	2016-11-02	02:40:00				457	KAIT	2016-12-26 22:42:00	1.714	2016-12-27	11:42:00
458	KAIT	2016-11-01 13:41:00	2.64	2016-11-02	02:41:00				458	KAIT	2016-12-26 22:43:00	1.713	2016-12-27	11:43:00
459	KAIT	2016-11-01 13:42:00	2.639	2016-11-02	02:42:00				459	KAIT	2016-12-26 22:44:00	1.709	2016-12-27	11:44:00
460	KAIT	2016-11-01 13:43:00	2.631	2016-11-02	02:43:00				460	KAIT	2016-12-26 22:45:00	1.709	2016-12-27	11:45:00
461	KAIT	2016-11-01 13:44:00	2.659	2016-11-02	02:44:00				461	KAIT	2016-12-26 22:46:00	1.699	2016-12-27	11:46:00
462	KAIT	2016-11-01 13:45:00	2.636	2016-11-02	02:45:00				462	KAIT	2016-12-26 22:47:00	1.704	2016-12-27	11:47:00
463	KAIT	2016-11-01 13:46:00	2.676	2016-11-02	02:46:00				463	KAIT	2016-12-26 22:48:00	1.711	2016-12-27	11:48:00
464	KAIT	2016-11-01 13:47:00	2.665	2016-11-02	02:47:00				464	KAIT	2016-12-26 22:49:00	1.723	2016-12-27	11:49:00
465	KAIT	2016-11-01 13:48:00	2.691	2016-11-02	02:48:00				465	KAIT	2016-12-26 22:50:00	1.731	2016-12-27	11:50:00
466	KAIT	2016-11-01 13:49:00	2.669	2016-11-02	02:49:00				466	KAIT	2016-12-26 22:51:00	1.741	2016-12-27	11:51:00
467	KAIT	2016-11-01 13:50:00	2.718	2016-11-02	02:50:00				467	KAIT	2016-12-26 22:52:00	1.73	2016-12-27	11:52:00
468	KAIT	2016-11-01 13:51:00	2.669	2016-11-02	02:51:00				468	KAIT	2016-12-26 22:53:00	1.726	2016-12-27	11:53:00
469	KAIT	2016-11-01 13:52:00	2.705	2016-11-02	02:52:00				469	KAIT	2016-12-26 22:54:00	1.739	2016-12-27	11:54:00
470	KAIT	2016-11-01 13:53:00	2.691	2016-11-02	02:53:00				470	KAIT	2016-12-26 22:55:00	1.749	2016-12-27	11:55:00
471	KAIT	2016-11-01 13:54:00	2.701	2016-11-02	02:54:00				471	KAIT	2016-12-26 22:56:00	1.771	2016-12-27	11:56:00
472	KAIT	2016-11-01 13:55:00	2.697	2016-11-02	02:55:00				472	KAIT	2016-12-26 22:57:00	1.782	2016-12-27	11:57:00
473	KAIT	2016-11-01 13:56:00	2.691	2016-11-02	02:56:00				473	KAIT	2016-12-26 22:58:00	1.776	2016-12-27	11:58:00
474	KAIT	2016-11-01 13:57:00	2.68	2016-11-02	02:57:00				474	KAIT	2016-12-26 22:59:00	1.766	2016-12-27	11:59:00
475	KAIT	2016-11-01 13:58:00	2.698	2016-11-02	02:58:00				475	KAIT	2016-12-26 23:00:00	1.765	2016-12-27	12:00:00
476	KAIT	2016-11-01 13:59:00	2.721	2016-11-02	02:59:00				476	KAIT	2016-12-26 23:01:00	1.763	2016-12-27	12:01:00
477	KAIT	2016-11-01 14:00:00	2.707	2016-11-02	03:00:00				477	KAIT	2016-12-26 23:02:00	1.76	2016-12-27	12:02:00
478	KAIT	2016-11-01 14:01:00	2.692	2016-11-02	03:01:00				478	KAIT	2016-12-26 23:03:00	1.744	2016-12-27	12:03:00
479	KAIT	2016-11-01 14:02:00	2.701	2016-11-02	03:02:00				479	KAIT	2016-12-26 23:04:00	1.72	2016-12-27	12:04:00
480	KAIT	2016-11-01 14:03:00	2.71	2016-11-02	03:03:00				480	KAIT	2016-12-26 23:05:00	1.724	2016-12-27	12:05:00
481	KAIT	2016-11-01 14:04:00	2.704	2016-11-02	03:04:00				481	KAIT	2016-12-26 23:06:00	1.732	2016-12-27	12:06:00
482	KAIT	2016-11-01 14:05:00	2.701	2016-11-02	03:05:00				482	KAIT	2016-12-26 23:07:00	1.763	2016-12-27	12:07:00
483	KAIT	2016-11-01 14:06:00	2.721	2016-11-02	03:06:00				483	KAIT	2016-12-26 23:08:00	1.781	2016-12-27	12:08:00
484	KAIT	2016-11-01 14:07:00	2.734	2016-11-02	03:07:00				484	KAIT	2016-12-26 23:09:00	1.799	2016-12-27	12:09:00
485	KAIT	2016-11-01 14:08:00	2.721	2016-11-02	03:08:00				485	KAIT	2016-12-26 23:10:00	1.806	2016-12-27	12:10:00
486	KAIT	2016-11-01 14:09:00	2.775	2016-11-02	03:09:00				486	KAIT	2016-12-26 23:11:00	1.823	2016-12-27	12:11:00
487	KAIT	2016-11-01 14:10:00	2.745	2016-11-02	03:10:00				487	KAIT	2016-12-26 23:12:00	1.837	2016-12-27	12:12:00
488	KAIT	2016-11-01 14:11:00	2.769	2016-11-02	03:11:00				488	KAIT	2016-12-26 23:13:00	1.835	2016-12-27	12:13:00
489	KAIT	2016-11-01 14:12:00	2.765	2016-11-02	03:12:00				489	KAIT	2016-12-26 23:14:00	1.841	2016-12-27	12:14:00
490	KAIT	2016-11-01 14:13:00	2.748	2016-11-02	03:13:00				490	KAIT	2016-12-26 23:15:00	1.839	2016-12-27	12:15:00
491	KAIT	2016-11-01 14:14:00	2.773	2016-11-02	03:14:00				491	KAIT	2016-12-26 23:16:00	1.833	2016-12-27	12:16:00
492	KAIT	2016-11-01 14:15:00	2.772	2016-11-02	03:15:00				492	KAIT	2016-12-26 23:17:00	1.825	2016-12-27	12:17:00
493	KAIT	2016-11-01 14:16:00	2.796	2016-11-02	03:16:00				493	KAIT	2016-12-26 23:18:00	1.822	2016-12-27	12:18:00
494	KAIT	2016-11-01 14:17:00	2.77	2016-11-02	03:17:00				494	KAIT	2016-12-26 23:19:00	1.829	2016-12-27	12:19:00
495	KAIT	2016-11-01 14:18:00	2.788	2016-11-02	03:18:00				495	KAIT	2016-12-26 23:20:00	1.835	2016-12-27	12:20:00
496	KAIT	2016-11-01 14:19:00	2.761	2016-11-02	03:19:00				496	KAIT	2016-12-26 23:21:00	1.837	2016-12-27	12:21:00
497	KAIT	2016-11-01 14:20:00	2.765	2016-11-02	03:20:00				497	KAIT	2016-12-26 23:22:00	1.845	2016-12-27	12:22:00
498	KAIT	2016-11-01 14:21:00	2.804	2016-11-02	03:21:00				498	KAIT	2016-12-26 23:23:00	1.848	2016-12-27	12:23:00
499	KAIT	2016-11-01 14:22:00	2.817	2016-11-02	03:22:00				499	KAIT	2016-12-26 23:24:00	1.87	2016-12-27	12:24:00
500	KAIT	2016-11-01 14:23:00	2.821	2016-11-02	03:23:00				500	KAIT	2016-12-26 23:25:00	1.867	2016-12-27	12:25:00
501	KAIT	2016-11-01 14:24:00	2.809	2016-11-02	03:24:00				501	KAIT	2016-12-26 23:26:00	1.863	2016-12-27	12:26:00
502	KAIT	2016-11-01 14:25:00	2.8	2016-11-02	03:25:00				502	KAIT	2016-12-26 23:27:00	1.856	2016-12-27	12:27:00
503	KAIT	2016-11-01 14:26:00	2.836	2016-11-02	03:26:00				503	KAIT	2016-12-26 23:28:00	1.863	2016-12-27	12:28:00
504	KAIT	2016-11-01 14:27:00	2.851	2016-11-02	03:27:00				504	KAIT	2016-12-26 23:29:00	1.866	2016-12-27	12:29:00
505	KAIT	2016-11-01 14:28:00	2.829	2016-11-02	03:28:00				505	KAIT	2016-12-26 23:30:00	1.872	2016-12-27	12:30:00
506	KAIT	2016-11-01 14:29:00	2.848	2016-11-02	03:29:00				506	KAIT	2016-12-26 23:31:00	1.879	2016-12-27	12:31:00
507	KAIT	2016-11-01 14:30:00	2.84	2016-11-02	03:30:00				507	KAIT	2016-12-26 23:32:00	1.889	2016-12-27	12:32:00
508	KAIT	2016-11-01 14:31:00	2.856	2016-11-02	03:31:00				508	KAIT	2016-12-26 23:33:00	1.896	2016-12-27	12:33:00
509	KAIT	2016-11-01 14:32:00	2.872	2016-11-02	03:32:00				509	KAIT	2016-12-26 23:34:00	1.896	2016-12-27	12:34:00
510	KAIT	2016-11-01 14:33:00	2.842	2016-11-02	03:33:00				510	KAIT	2016-12-26 23:35:00	1.894	2016-12-27	12:35:00
511	KAIT	2016-11-01 14:34:00	2.855	2016-11-02	03:34:00				511	KAIT	2016-12-26 23:36:00	1.89	2016-12-27	12:36:00
512	KAIT	2016-11-01 14:35:00	2.874	2016-11-02	03:35:00				512	KAIT	2016-12-26 23:37:00	1.891	2016-12-27	12:37:00
513	KAIT	2016-11-01 14:36:00	2.869	2016-11-02	03:36:00				513	KAIT	2016-12-26 23:38:00	1.892	2016-12-27	12:38:00
514	KAIT	2016-11-01 14:37:00	2.887	2016-11-02	03:37:00				514	KAIT	2016-12-26 23:39:00	1.886	2016-12-27	12:39:00
515	KAIT	2016-11-01 14:38:00	2.861	2016-11-02	03:38:00				515	KAIT	2016-12-26 23:40:00	1.901	2016-12-27	12:40:00
516	KAIT	2016-11-01 14:39:00	2.89	2016-11-02	03:39:00				516	KAIT	2016-12-26 23:41:00	1.921	2016-12-27	12:41:00
517	KAIT	2016-11-01 14:40:00	2.86	2016-11-02	03:40:00				517	KAIT	2016-12-26 23:42:00	1.937	2016-12-27	12:42:00
518	KAIT	2016-11-01 14:41:00	2.895	2016-11-02	03:41:00				518	KAIT	2016-12-26 23:43:00	1.95	2016-12-27	12:43:00
519	KAIT	2016-11-01 14:42:00	2.873	2016-11-02	03:42:00				519	KAIT	2016-12-26 23:44:00	1.952	2016-12-27	12:44:00
520	KAIT	2016-11-01 14:43:00	2.898	2016-11-02	03:43:00				520	KAIT	2016-12-26 23:45:00	1.967	2016-12-27	12:45:00
521	KAIT	2016-11-01 14:44:00	2.914	2016-11-02	03:44:00				521	KAIT	2016-12-26 23:46:00	1.98	2016-12-27	12:46:00
522	KAIT	2016-11-01 14:45:00	2.889	2016-11-02	03:45:00				522	KAIT	2016-12-26 23:47:00	1.963	2016-12-27	12:47:00
523	KAIT	2016-11-01 14:46:00	2.909	2016-11-02	03:46:00				523	KAIT	2016-12-26 23:48:00	1.975	2016-12-27	12:48:00
524	KAIT	2016-11-01 14:47:00	2.923	2016-11-02	03:47:00				524	KAIT	2016-12-26 23:49:00	1.977	2016-12-27	12:49:00
525	KAIT	2016-11-01 14:48:00	2.898	2016-11-02	03:48:00				525	KAIT	2016-12-26 23:50:00	1.976	2016-12-27	12:50:00
526	KAIT	2016-11-01 14:49:00	2.914	2016-11-02	03:49:00				526	KAIT	2016-12-26 23:51:00	1.976	2016-12-27	12:51:00
527	KAIT	2016-11-01 14:50:00	2.914	2016-11-02	03:50:00				527	KAIT	2016-12-26 23:52:00	1.961	2016-12-27	12:52:00
528	KAIT	2016-11-01 14:51:00	2.946	2016-11-02	03:51:00				528	KAIT	2016-12-26 23:53:00	1.964	2016-12-27	12:53:00
529	KAIT	2016-11-01 14:52:00	2.94	2016-11-02	03:52:00				529	KAIT	2016-12-26 23:54:00	1.959	2016-12-27	12:54:00
530	KAIT	2016-11-01 14:53:00	2.952	2016-11-02	03:53:00				530	KAIT	2016-12-26 23:55:00	1.97	2016-12-27	12:55:00
531	KAIT	2016-11-01 14:54:00	2.939	2016-11-02	03:54:00				531	KAIT	2016-12-26 23:56:00	1.975	2016-12-27	12:56:00
532	KAIT	2016-11-01 14:55:00	2.964	2016-11-02	03:55:00				532	KAIT	2016-12-26 23:57:00	1.98	2016-12-27	12:57:00
533	KAIT	2016-11-01 14:56:00	2.959	2016-11-02	03:56:00				533	KAIT	2016-12-26 23:58:00	1.975	2016-12-27	12:58:00
534	KAIT	2016-11-01 14:57:00	2.959	2016-11-02	03:57:00				534	KAIT	2016-12-26 23:59:00	2	2016-12-27	12:59:00
535	KAIT	2016-11-01 14:58:00	2.962	2016-11-02	03:58:00				535	KAIT	2016-12-27	2.01	2016-12-27	13:00:00
536	KAIT	2016-11-01 14:59:00	2.991	2016-11-02	03:59:00				536	KAIT	2016-12-27 00:01:00	2.012	2016-12-27	13:01:00
537	KAIT	2016-11-01 15:00:00	2.982	2016-11-02	04:00:00				537	KAIT	2016-12-27 00:02:00	2.003	2016-12-27	13:02:00
538	KAIT	2016-11-01 15:01:00	2.988	2016-11-02	04:01:00				538	KAIT	2016-12-27 00:03:00	2.01	2016-12-27	13:03:00
539	KAIT	2016-11-01 15:02:00	3.004	2016-11-02	04:02:00				539	KAIT	2016-12-27 00:04:00	2.019	2016-12-27	13:04:00
540	KAIT	2016-11-01 15:03:00	3.028	2016-11-02	04:03:00				540	KAIT	2016-12-27 00:05:00	2.037	2016-12-27	13:05:00
541	KAIT	2016-11-01 15:04:00	3.015	2016-11-02	04:04:00				541	KAIT	2016-12-27 00:06:00	2.058	2016-12-27	13:06:00
542	KAIT	2016-11-01 15:05:00	3.042	2016-11-02	04:05:00				542	KAIT	2016-12-27 00:07:00	2.073	2016-12-27	13:07:00
543	KAIT	2016-11-01 15:06:00	3.025	2016-11-02	04:06:00				543	KAIT	2016-12-27 00:08:00	2.096	2016-12-27	13:08:00
544	KAIT	2016-11-01 15:07:00	3.024	2016-11-02	04:07:00				544	KAIT	2016-12-27 00:09:00	2.1	2016-12-27	13:09:00
545	KAIT	2016-11-01 15:08:00	3.019	2016-11-02	04:08:00				545	KAIT	2016-12-27 00:10:00	2.101	2016-12-27	13:10:00
546	KAIT	2016-11-01 15:09:00	3.032	2016-11-02	04:09:00				546	KAIT	2016-12-27 00:11:00	2.095	2016-12-27	13:11:00
547	KAIT	2016-11-01 15:10:00	3.003	2016-11-02	04:10:00				547	KAIT	2016-12-27 00:12:00	2.086	2016-12-27	13:12:00
548	KAIT	2016-11-01 15:11:00	3.017	2016-11-02	04:11:00				548	KAIT	2016-12-27 00:13:00	2.076	2016-12-27	13:13:00
549	KAIT	2016-11-01 15:12:00	3.018	2016-11-02	04:12:00				549	KAIT	2016-12-27 00:14:00	2.07	2016-12-27	13:14:00
550	KAIT	2016-11-01 15:13:00	3.032	2016-11-02	04:13:00				550	KAIT	2016-12-27 00:15:00	2.084	2016-12-27	13:15:00
551	KAIT	2016-11-01 15:14:00	3.024	2016-11-02	04:14:00				551	KAIT	2016-12-27 00:16:00	2.083	2016-12-27	13:16:00
552	KAIT	2016-11-01 15:15:00	3.054	2016-11-02	04:15:00				552	KAIT	2016-12-27 00:17:00	2.088	2016-12-27	13:17:00
553	KAIT	2016-11-01 15:16:00	3.058	2016-11-02	04:16:00				553	KAIT	2016-12-27 00:18:00	2.104	2016-12-27	13:18:00
554	KAIT	2016-11-01 15:17:00	3.038	2016-11-02	04:17:00				554	KAIT	2016-12-27 00:19:00	2.117	2016-12-27	13:19:00
555	KAIT	2016-11-01 15:18:00	3.074	2016-11-02	04:18:00				555	KAIT	2016-12-27 00:20:00	2.113	2016-12-27	13:20:00
556	KAIT	2016-11-01 15:19:00	3.066	2016-11-02	04:19:00				556	KAIT	2016-12-27 00:21:00	2.115	2016-12-27	13:21:00
557	KAIT	2016-11-01 15:20:00	3.066	2016-11-02	04:20:00				557	KAIT	2016-12-27 00:22:00	2.106	2016-12-27	13:22:00
558	KAIT	2016-11-01 15:21:00	3.085	2016-11-02	04:21:00				558	KAIT	2016-12-27 00:23:00	2.118	2016-12-27	13:23:00
559	KAIT	2016-11-01 15:22:00	3.093	2016-11-02	04:22:00				559	KAIT	2016-12-27 00:24:00	2.14	2016-12-27	13:24:00
560	KAIT	2016-11-01 15:23:00	3.078	2016-11-02	04:23:00				560	KAIT	2016-12-27 00:25:00	2.15	2016-12-27	13:25:00
561	KAIT	2016-11-01 15:24:00	3.141	2016-11-02	04:24:00				561	KAIT	2016-12-27 00:26:00	2.138	2016-12-27	13:26:00
562	KAIT	2016-11-01 15:25:00	3.123	2016-11-02	04:25:00				562	KAIT	2016-12-27 00:27:00	2.12	2016-12-27	13:27:00
563	KAIT	2016-11-01 15:26:00	3.11	2016-11-02	04:26:00				563	KAIT	2016-12-27 00:28:00	2.119	2016-12-27	13:28:00
564	KAIT	2016-11-01 15:27:00	3.134	2016-11-02	04:27:00				564	KAIT	2016-12-27 00:29:00	2.117	2016-12-27	13:29:00
565	KAIT	2016-11-01 15:28:00	3.132	2016-11-02	04:28:00				565	KAIT	2016-12-27 00:30:00	2.121	2016-12-27	13:30:00
566	KAIT	2016-11-01 15:29:00	3.121	2016-11-02	04:29:00				566	KAIT	2016-12-27 00:31:00	2.133	2016-12-27	13:31:00
567	KAIT	2016-11-01 15:30:00	3.142	2016-11-02	04:30:00				567	KAIT	2016-12-27 00:32:00	2.142	2016-12-27	13:32:00
568	KAIT	2016-11-01 15:31:00	3.163	2016-11-02	04:31:00				568	KAIT	2016-12-27 00:33:00	2.171	2016-12-27	13:33:00
569	KAIT	2016-11-01 15:32:00	3.139	2016-11-02	04:32:00				569	KAIT	2016-12-27 00:34:00	2.175	2016-12-27	13:34:00
570	KAIT	2016-11-01 15:33:00	3.16	2016-11-02	04:33:00				570	KAIT	2016-12-27 00:35:00	2.192	2016-12-27	13:35:00
571	KAIT	2016-11-01 15:34:00	3.159	2016-11-02	04:34:00				571	KAIT	2016-12-27 00:36:00	2.197	2016-12-27	13:36:00
572	KAIT	2016-11-01 15:35:00	3.15	2016-11-02	04:35:00				572	KAIT	2016-12-27 00:37:00	2.19	2016-12-27	13:37:00
573	KAIT	2016-11-01 15:36:00	3.178	2016-11-02	04:36:00				573	KAIT	2016-12-27 00:38:00	2.183	2016-12-27	13:38:00
574	KAIT	2016-11-01 15:37:00	3.152	2016-11-02	04:37:00				574	KAIT	2016-12-27 00:39:00	2.165	2016-12-27	13:39:00
575	KAIT	2016-11-01 15:38:00	3.187	2016-11-02	04:38:00				575	KAIT	2016-12-27 00:40:00	2.189	2016-12-27	13:40:00
576	KAIT	2016-11-01 15:39:00	3.174	2016-11-02	04:39:00				576	KAIT	2016-12-27 00:41:00	2.202	2016-12-27	13:41:00
577	KAIT	2016-11-01 15:40:00	3.194	2016-11-02	04:40:00				577	KAIT	2016-12-27 00:42:00	2.213	2016-12-27	13:42:00
578	KAIT	2016-11-01 15:41:00	3.182	2016-11-02	04:41:00				578	KAIT	2016-12-27 00:43:00	2.224	2016-12-27	13:43:00
579	KAIT	2016-11-01 15:42:00	3.198	2016-11-02	04:42:00				579	KAIT	2016-12-27 00:44:00	2.242	2016-12-27	13:44:00
580	KAIT	2016-11-01 15:43:00	3.172	2016-11-02	04:43:00				580	KAIT	2016-12-27 00:45:00	2.24	2016-12-27	13:45:00
581	KAIT	2016-11-01 15:44:00	3.2	2016-11-02	04:44:00				581	KAIT	2016-12-27 00:46:00	2.246	2016-12-27	13:46:00
582	KAIT	2016-11-01 15:45:00	3.181	2016-11-02	04:45:00				582	KAIT	2016-12-27 00:47:00	2.243	2016-12-27	13:47:00
583	KAIT	2016-11-01 15:46:00	3.198	2016-11-02	04:46:00				583	KAIT	2016-12-27 00:48:00	2.228	2016-12-27	13:48:00
584	KAIT	2016-11-01 15:47:00	3.213	2016-11-02	04:47:00				584	KAIT	2016-12-27 00:49:00	2.214	2016-12-27	13:49:00
585	KAIT	2016-11-01 15:48:00	3.211	2016-11-02	04:48:00				585	KAIT	2016-12-27 00:50:00	2.22	2016-12-27	13:50:00
586	KAIT	2016-11-01 15:49:00	3.189	2016-11-02	04:49:00				586	KAIT	2016-12-27 00:51:00	2.236	2016-12-27	13:51:00
587	KAIT	2016-11-01 15:50:00	3.221	2016-11-02	04:50:00				587	KAIT	2016-12-27 00:52:00	2.244	2016-12-27	13:52:00
588	KAIT	2016-11-01 15:51:00	3.223	2016-11-02	04:51:00				588	KAIT	2016-12-27 00:53:00	2.248	2016-12-27	13:53:00
589	KAIT	2016-11-01 15:52:00	3.224	2016-11-02	04:52:00				589	KAIT	2016-12-27 00:54:00	2.234	2016-12-27	13:54:00
590	KAIT	2016-11-01 15:53:00	3.23	2016-11-02	04:53:00				590	KAIT	2016-12-27 00:55:00	2.243	2016-12-27	13:55:00
591	KAIT	2016-11-01 15:54:00	3.23	2016-11-02	04:54:00				591	KAIT	2016-12-27 00:56:00	2.249	2016-12-27	13:56:00
592	KAIT	2016-11-01 15:55:00	3.252	2016-11-02	04:55:00				592	KAIT	2016-12-27 00:57:00	2.251	2016-12-27	13:57:00
593	KAIT	2016-11-01 15:56:00	3.264	2016-11-02	04:56:00				593	KAIT	2016-12-27 00:58:00	2.262	2016-12-27	13:58:00
594	KAIT	2016-11-01 15:57:00	3.259	2016-11-02	04:57:00				594	KAIT	2016-12-27 00:59:00	2.275	2016-12-27	13:59:00
595	KAIT	2016-11-01 15:58:00	3.277	2016-11-02	04:58:00				595	KAIT	2016-12-27 01:00:00	2.271	2016-12-27	14:00:00
596	KAIT	2016-11-01 15:59:00	3.249	2016-11-02	04:59:00				596	KAIT	2016-12-27 01:01:00	2.267	2016-12-27	14:01:00
597	KAIT	2016-11-01 16:00:00	3.272	2016-11-02	05:00:00				597	KAIT	2016-12-27 01:02:00	2.28	2016-12-27	14:02:00
598	KAIT	2016-11-01 16:01:00	3.299	2016-11-02	05:01:00				598	KAIT	2016-12-27 01:03:00	2.286	2016-12-27	14:03:00
599	KAIT	2016-11-01 16:02:00	3.255	2016-11-02	05:02:00				599	KAIT	2016-12-27 01:04:00	2.289	2016-12-27	14:04:00
600	KAIT	2016-11-01 16:03:00	3.299	2016-11-02	05:03:00				600	KAIT	2016-12-27 01:05:00	2.272	2016-12-27	14:05:00
601	KAIT	2016-11-01 16:04:00	3.289	2016-11-02	05:04:00				601	KAIT	2016-12-27 01:06:00	2.263	2016-12-27	14:06:00
602	KAIT	2016-11-01 16:05:00	3.294	2016-11-02	05:05:00				602	KAIT	2016-12-27 01:07:00	2.27	2016-12-27	14:07:00
603	KAIT	2016-11-01 16:06:00	3.297	2016-11-02	05:06:00				603	KAIT	2016-12-27 01:08:00	2.271	2016-12-27	14:08:00
604	KAIT	2016-11-01 16:07:00	3.317	2016-11-02	05:07:00				604	KAIT	2016-12-27 01:09:00	2.285	2016-12-27	14:09:00
605	KAIT	2016-11-01 16:08:00	3.328	2016-11-02	05:08:00				605	KAIT	2016-12-27 01:10:00	2.307	2016-12-27	14:10:00
606	KAIT	2016-11-01 16:09:00	3.323	2016-11-02	05:09:00				606	KAIT	2016-12-27 01:11:00	2.305	2016-12-27	14:11:00
607	KAIT	2016-11-01 16:10:00	3.324	2016-11-02	05:10:00				607	KAIT	2016-12-27 01:12:00	2.31	2016-12-27	14:12:00
608	KAIT	2016-11-01 16:11:00	3.345	2016-11-02	05:11:00				608	KAIT	2016-12-27 01:13:00	2.316	2016-12-27	14:13:00
609	KAIT	2016-11-01 16:12:00	3.34	2016-11-02	05:12:00				609	KAIT	2016-12-27 01:14:00	2.339	2016-12-27	14:14:00
610	KAIT	2016-11-01 16:13:00	3.342	2016-11-02	05:13:00				610	KAIT	2016-12-27 01:15:00	2.361	2016-12-27	14:15:00
611	KAIT	2016-11-01 16:14:00	3.333	2016-11-02	05:14:00				611	KAIT	2016-12-27 01:16:00	2.354	2016-12-27	14:16:00
612	KAIT	2016-11-01 16:15:00	3.338	2016-11-02	05:15:00				612	KAIT	2016-12-27 01:17:00	2.352	2016-12-27	14:17:00
613	KAIT	2016-11-01 16:16:00	3.313	2016-11-02	05:16:00				613	KAIT	2016-12-27 01:18:00	2.35	2016-12-27	14:18:00
614	KAIT	2016-11-01 16:17:00	3.321	2016-11-02	05:17:00				614	KAIT	2016-12-27 01:19:00	2.346	2016-12-27	14:19:00
615	KAIT	2016-11-01 16:18:00	3.326	2016-11-02	05:18:00				615	KAIT	2016-12-27 01:20:00	2.345	2016-12-27	14:20:00
616	KAIT	2016-11-01 16:19:00	3.336	2016-11-02	05:19:00				616	KAIT	2016-12-27 01:21:00	2.355	2016-12-27	14:21:00
617	KAIT	2016-11-01 16:20:00	3.341	2016-11-02	05:20:00				617	KAIT	2016-12-27 01:22:00	2.342	2016-12-27	14:22:00
618	KAIT	2016-11-01 16:21:00	3.368	2016-11-02	05:21:00				618	KAIT	2016-12-27 01:23:00	2.339	2016-12-27	14:23:00
619	KAIT	2016-11-01 16:22:00	3.343	2016-11-02	05:22:00				619	KAIT	2016-12-27 01:24:00	2.355	2016-12-27	14:24:00
620	KAIT	2016-11-01 16:23:00	3.362	2016-11-02	05:23:00				620	KAIT	2016-12-27 01:25:00	2.371	2016-12-27	14:25:00
621	KAIT	2016-11-01 16:24:00	3.38	2016-11-02	05:24:00				621	KAIT	2016-12-27 01:26:00	2.385	2016-12-27	14:26:00
622	KAIT	2016-11-01 16:25:00	3.381	2016-11-02	05:25:00				622	KAIT	2016-12-27 01:27:00	2.384	2016-12-27	14:27:00
623	KAIT	2016-11-01 16:26:00	3.394	2016-11-02	05:26:00				623	KAIT	2016-12-27 01:28:00	2.401	2016-12-27	14:28:00
624	KAIT	2016-11-01 16:27:00	3.382	2016-11-02	05:27:00				624	KAIT	2016-12-27 01:29:00	2.401	2016-12-27	14:29:00
625	KAIT	2016-11-01 16:28:00	3.365	2016-11-02	05:28:00				625	KAIT	2016-12-27 01:30:00	2.394	2016-12-27	14:30:00
626	KAIT	2016-11-01 16:29:00	3.392	2016-11-02	05:29:00				626	KAIT	2016-12-27 01:31:00	2.375	2016-12-27	14:31:00
627	KAIT	2016-11-01 16:30:00	3.392	2016-11-02	05:30:00				627	KAIT	2016-12-27 01:32:00	2.377	2016-12-27	14:32:00
628	KAIT	2016-11-01 16:31:00	3.385	2016-11-02	05:31:00				628	KAIT	2016-12-27 01:33:00	2.385	2016-12-27	14:33:00
629	KAIT	2016-11-01 16:32:00	3.393	2016-11-02	05:32:00				629	KAIT	2016-12-27 01:34:00	2.408	2016-12-27	14:34:00
630	KAIT	2016-11-01 16:33:00	3.403	2016-11-02	05:33:00				630	KAIT	2016-12-27 01:35:00	2.416	2016-12-27	14:35:00
631	KAIT	2016-11-01 16:34:00	3.394	2016-11-02	05:34:00				631	KAIT	2016-12-27 01:36:00	2.418	2016-12-27	14:36:00
632	KAIT	2016-11-01 16:35:00	3.378	2016-11-02	05:35:00				632	KAIT	2016-12-27 01:37:00	2.442	2016-12-27	14:37:00
633	KAIT	2016-11-01 16:36:00	3.424	2016-11-02	05:36:00				633	KAIT	2016-12-27 01:38:00	2.435	2016-12-27	14:38:00
634	KAIT	2016-11-01 16:37:00	3.4	2016-11-02	05:37:00				634	KAIT	2016-12-27 01:39:00	2.439	2016-12-27	14:39:00
635	KAIT	2016-11-01 16:38:00	3.451	2016-11-02	05:38:00				635	KAIT	2016-12-27 01:40:00	2.442	2016-12-27	14:40:00
636	KAIT	2016-11-01 16:39:00	3.421	2016-11-02	05:39:00				636	KAIT	2016-12-27 01:41:00	2.438	2016-12-27	14:41:00
637	KAIT	2016-11-01 16:40:00	3.448	2016-11-02	05:40:00				637	KAIT	2016-12-27 01:42:00	2.45	2016-12-27	14:42:00
638	KAIT	2016-11-01 16:41:00	3.425	2016-11-02	05:41:00				638	KAIT	2016-12-27 01:43:00	2.443	2016-12-27	14:43:00
639	KAIT	2016-11-01 16:42:00	3.44	2016-11-02	05:42:00				639	KAIT	2016-12-27 01:44:00	2.455	2016-12-27	14:44:00
640	KAIT	2016-11-01 16:43:00	3.439	2016-11-02	05:43:00				640	KAIT	2016-12-27 01:45:00	2.453	2016-12-27	14:45:00
641	KAIT	2016-11-01 16:44:00	3.435	2016-11-02	05:44:00				641	KAIT	2016-12-27 01:46:00	2.455	2016-12-27	14:46:00
642	KAIT	2016-11-01 16:45:00	3.431	2016-11-02	05:45:00				642	KAIT	2016-12-27 01:47:00	2.445	2016-12-27	14:47:00
643	KAIT	2016-11-01 16:46:00	3.46	2016-11-02	05:46:00				643	KAIT	2016-12-27 01:48:00	2.444	2016-12-27	14:48:00
644	KAIT	2016-11-01 16:47:00	3.467	2016-11-02	05:47:00				644	KAIT	2016-12-27 01:49:00	2.444	2016-12-27	14:49:00
645	KAIT	2016-11-01 16:48:00	3.451	2016-11-02	05:48:00				645	KAIT	2016-12-27 01:50:00	2.453	2016-12-27	14:50:00
646	KAIT	2016-11-01 16:49:00	3.442	2016-11-02	05:49:00				646	KAIT	2016-12-27 01:51:00	2.454	2016-12-27	14:51:00
647	KAIT	2016-11-01 16:50:00	3.436	2016-11-02	05:50:00				647	KAIT	2016-12-27 01:52:00	2.465	2016-12-27	14:52:00
648	KAIT	2016-11-01 16:51:00	3.464	2016-11-02	05:51:00				648	KAIT	2016-12-27 01:53:00	2.459	2016-12-27	14:53:00
649	KAIT	2016-11-01 16:52:00	3.458	2016-11-02	05:52:00				649	KAIT	2016-12-27 01:54:00	2.452	2016-12-27	14:54:00
650	KAIT	2016-11-01 16:53:00	3.469	2016-11-02	05:53:00				650	KAIT	2016-12-27 01:55:00	2.453	2016-12-27	14:55:00
651	KAIT	2016-11-01 16:54:00	3.462	2016-11-02	05:54:00				651	KAIT	2016-12-27 01:56:00	2.458	2016-12-27	14:56:00
652	KAIT	2016-11-01 16:55:00	3.47	2016-11-02	05:55:00				652	KAIT	2016-12-27 01:57:00	2.462	2016-12-27	14:57:00
653	KAIT	2016-11-01 16:56:00	3.481	2016-11-02	05:56:00				653	KAIT	2016-12-27 01:58:00	2.457	2016-12-27	14:58:00
654	KAIT	2016-11-01 16:57:00	3.498	2016-11-02	05:57:00				654	KAIT	2016-12-27 01:59:00	2.465	2016-12-27	14:59:00
655	KAIT	2016-11-01 16:58:00	3.509	2016-11-02	05:58:00				655	KAIT	2016-12-27 02:00:00	2.477	2016-12-27	15:00:00
656	KAIT	2016-11-01 16:59:00	3.494	2016-11-02	05:59:00				656	KAIT	2016-12-27 02:01:00	2.479	2016-12-27	15:01:00
657	KAIT	2016-11-01 17:00:00	3.514	2016-11-02	06:00:00				657	KAIT	2016-12-27 02:02:00	2.483	2016-12-27	15:02:00
658	KAIT	2016-11-01 17:01:00	3.498	2016-11-02	06:01:00				658	KAIT	2016-12-27 02:03:00	2.499	2016-12-27	15:03:00
659	KAIT	2016-11-01 17:02:00	3.473	2016-11-02	06:02:00				659	KAIT	2016-12-27 02:04:00	2.514	2016-12-27	15:04:00
660	KAIT	2016-11-01 17:03:00	3.491	2016-11-02	06:03:00				660	KAIT	2016-12-27 02:05:00	2.509	2016-12-27	15:05:00
661	KAIT	2016-11-01 17:04:00	3.47	2016-11-02	06:04:00				661	KAIT	2016-12-27 02:06:00	2.531	2016-12-27	15:06:00
662	KAIT	2016-11-01 17:05:00	3.485	2016-11-02	06:05:00				662	KAIT	2016-12-27 02:07:00	2.54	2016-12-27	15:07:00
663	KAIT	2016-11-01 17:06:00	3.469	2016-11-02	06:06:00				663	KAIT	2016-12-27 02:08:00	2.543	2016-12-27	15:08:00
664	KAIT	2016-11-01 17:07:00	3.481	2016-11-02	06:07:00				664	KAIT	2016-12-27 02:09:00	2.558	2016-12-27	15:09:00
665	KAIT	2016-11-01 17:08:00	3.502	2016-11-02	06:08:00				665	KAIT	2016-12-27 02:10:00	2.578	2016-12-27	15:10:00
666	KAIT	2016-11-01 17:09:00	3.525	2016-11-02	06:09:00				666	KAIT	2016-12-27 02:11:00	2.58	2016-12-27	15:11:00
667	KAIT	2016-11-01 17:10:00	3.495	2016-11-02	06:10:00				667	KAIT	2016-12-27 02:12:00	2.566	2016-12-27	15:12:00
668	KAIT	2016-11-01 17:11:00	3.511	2016-11-02	06:11:00				668	KAIT	2016-12-27 02:13:00	2.563	2016-12-27	15:13:00
669	KAIT	2016-11-01 17:12:00	3.52	2016-11-02	06:12:00				669	KAIT	2016-12-27 02:14:00	2.557	2016-12-27	15:14:00
670	KAIT	2016-11-01 17:13:00	3.509	2016-11-02	06:13:00				670	KAIT	2016-12-27 02:15:00	2.541	2016-12-27	15:15:00
671	KAIT	2016-11-01 17:14:00	3.531	2016-11-02	06:14:00				671	KAIT	2016-12-27 02:16:00	2.529	2016-12-27	15:16:00
672	KAIT	2016-11-01 17:15:00	3.53	2016-11-02	06:15:00				672	KAIT	2016-12-27 02:17:00	2.547	2016-12-27	15:17:00
673	KAIT	2016-11-01 17:16:00	3.511	2016-11-02	06:16:00				673	KAIT	2016-12-27 02:18:00	2.553	2016-12-27	15:18:00
674	KAIT	2016-11-01 17:17:00	3.549	2016-11-02	06:17:00				674	KAIT	2016-12-27 02:19:00	2.549	2016-12-27	15:19:00
675	KAIT	2016-11-01 17:18:00	3.55	2016-11-02	06:18:00				675	KAIT	2016-12-27 02:20:00	2.559	2016-12-27	15:20:00
676	KAIT	2016-11-01 17:19:00	3.538	2016-11-02	06:19:00				676	KAIT	2016-12-27 02:21:00	2.575	2016-12-27	15:21:00
677	KAIT	2016-11-01 17:20:00	3.567	2016-11-02	06:20:00				677	KAIT	2016-12-27 02:22:00	2.583	2016-12-27	15:22:00
678	KAIT	2016-11-01 17:21:00	3.556	2016-11-02	06:21:00				678	KAIT	2016-12-27 02:23:00	2.571	2016-12-27	15:23:00
679	KAIT	2016-11-01 17:22:00	3.545	2016-11-02	06:22:00				679	KAIT	2016-12-27 02:24:00	2.563	2016-12-27	15:24:00
680	KAIT	2016-11-01 17:23:00	3.548	2016-11-02	06:23:00				680	KAIT	2016-12-27 02:25:00	2.551	2016-12-27	15:25:00
681	KAIT	2016-11-01 17:24:00	3.562	2016-11-02	06:24:00				681	KAIT	2016-12-27 02:26:00	2.555	2016-12-27	15:26:00
682	KAIT	2016-11-01 17:25:00	3.538	2016-11-02	06:25:00				682	KAIT	2016-12-27 02:27:00	2.553	2016-12-27	15:27:00
683	KAIT	2016-11-01 17:26:00	3.558	2016-11-02	06:26:00				683	KAIT	2016-12-27 02:28:00	2.564	2016-12-27	15:28:00
684	KAIT	2016-11-01 17:27:00	3.539	2016-11-02	06:27:00				684	KAIT	2016-12-27 02:29:00	2.555	2016-12-27	15:29:00
685	KAIT	2016-11-01 17:28:00	3.579	2016-11-02	06:28:00				685	KAIT	2016-12-27 02:30:00	2.55	2016-12-27	15:30:00
686	KAIT	2016-11-01 17:29:00	3.571	2016-11-02	06:29:00				686	KAIT	2016-12-27 02:31:00	2.552	2016-12-27	15:31:00
687	KAIT	2016-11-01 17:30:00	3.571	2016-11-02	06:30:00				687	KAIT	2016-12-27 02:32:00	2.564	2016-12-27	15:32:00
688	KAIT	2016-11-01 17:31:00	3.565	2016-11-02	06:31:00				688	KAIT	2016-12-27 02:33:00	2.581	2016-12-27	15:33:00
689	KAIT	2016-11-01 17:32:00	3.579	2016-11-02	06:32:00				689	KAIT	2016-12-27 02:34:00	2.582	2016-12-27	15:34:00
690	KAIT	2016-11-01 17:33:00	3.597	2016-11-02	06:33:00				690	KAIT	2016-12-27 02:35:00	2.598	2016-12-27	15:35:00
691	KAIT	2016-11-01 17:34:00	3.598	2016-11-02	06:34:00				691	KAIT	2016-12-27 02:36:00	2.597	2016-12-27	15:36:00
692	KAIT	2016-11-01 17:35:00	3.599	2016-11-02	06:35:00				692	KAIT	2016-12-27 02:37:00	2.611	2016-12-27	15:37:00
693	KAIT	2016-11-01 17:36:00	3.574	2016-11-02	06:36:00				693	KAIT	2016-12-27 02:38:00	2.624	2016-12-27	15:38:00
694	KAIT	2016-11-01 17:37:00	3.569	2016-11-02	06:37:00				694	KAIT	2016-12-27 02:39:00	2.625	2016-12-27	15:39:00
695	KAIT	2016-11-01 17:38:00	3.572	2016-11-02	06:38:00				695	KAIT	2016-12-27 02:40:00	2.633	2016-12-27	15:40:00
696	KAIT	2016-11-01 17:39:00	3.584	2016-11-02	06:39:00				696	KAIT	2016-12-27 02:41:00	2.622	2016-12-27	15:41:00
697	KAIT	2016-11-01 17:40:00	3.574	2016-11-02	06:40:00				697	KAIT	2016-12-27 02:42:00	2.617	2016-12-27	15:42:00
698	KAIT	2016-11-01 17:41:00	3.568	2016-11-02	06:41:00				698	KAIT	2016-12-27 02:43:00	2.605	2016-12-27	15:43:00
699	KAIT	2016-11-01 17:42:00	3.584	2016-11-02	06:42:00				699	KAIT	2016-12-27 02:44:00	2.61	2016-12-27	15:44:00
700	KAIT	2016-11-01 17:43:00	3.58	2016-11-02	06:43:00				700	KAIT	2016-12-27 02:45:00	2.618	2016-12-27	15:45:00
701	KAIT	2016-11-01 17:44:00	3.565	2016-11-02	06:44:00				701	KAIT	2016-12-27 02:46:00	2.627	2016-12-27	15:46:00
702	KAIT	2016-11-01 17:45:00	3.588	2016-11-02	06:45:00				702	KAIT	2016-12-27 02:47:00	2.627	2016-12-27	15:47:00
703	KAIT	2016-11-01 17:46:00	3.598	2016-11-02	06:46:00				703	KAIT	2016-12-27 02:48:00	2.612	2016-12-27	15:48:00
704	KAIT	2016-11-01 17:47:00	3.611	2016-11-02	06:47:00				704	KAIT	2016-12-27 02:49:00	2.608	2016-12-27	15:49:00
705	KAIT	2016-11-01 17:48:00	3.588	2016-11-02	06:48:00				705	KAIT	2016-12-27 02:50:00	2.613	2016-12-27	15:50:00
706	KAIT	2016-11-01 17:49:00	3.577	2016-11-02	06:49:00				706	KAIT	2016-12-27 02:51:00	2.611	2016-12-27	15:51:00
707	KAIT	2016-11-01 17:50:00	3.602	2016-11-02	06:50:00				707	KAIT	2016-12-27 02:52:00	2.611	2016-12-27	15:52:00
708	KAIT	2016-11-01 17:51:00	3.617	2016-11-02	06:51:00				708	KAIT	2016-12-27 02:53:00	2.598	2016-12-27	15:53:00
709	KAIT	2016-11-01 17:52:00	3.599	2016-11-02	06:52:00				709	KAIT	2016-12-27 02:54:00	2.613	2016-12-27	15:54:00
710	KAIT	2016-11-01 17:53:00	3.608	2016-11-02	06:53:00				710	KAIT	2016-12-27 02:55:00	2.612	2016-12-27	15:55:00
711	KAIT	2016-11-01 17:54:00	3.619	2016-11-02	06:54:00				711	KAIT	2016-12-27 02:56:00	2.632	2016-12-27	15:56:00
712	KAIT	2016-11-01 17:55:00	3.616	2016-11-02	06:55:00				712	KAIT	2016-12-27 02:57:00	2.627	2016-12-27	15:57:00
713	KAIT	2016-11-01 17:56:00	3.624	2016-11-02	06:56:00				713	KAIT	2016-12-27 02:58:00	2.631	2016-12-27	15:58:00
714	KAIT	2016-11-01 17:57:00	3.598	2016-11-02	06:57:00				714	KAIT	2016-12-27 02:59:00	2.625	2016-12-27	15:59:00
715	KAIT	2016-11-01 17:58:00	3.623	2016-11-02	06:58:00				715	KAIT	2016-12-27 03:00:00	2.62	2016-12-27	16:00:00
716	KAIT	2016-11-01 17:59:00	3.602	2016-11-02	06:59:00				716	KAIT	2016-12-27 03:01:00	2.618	2016-12-27	16:01:00
717	KAIT	2016-11-01 18:00:00	3.628	2016-11-02	07:00:00				717	KAIT	2016-12-27 03:02:00	2.616	2016-12-27	16:02:00
718	KAIT	2016-11-01 18:01:00	3.619	2016-11-02	07:01:00				718	KAIT	2016-12-27 03:03:00	2.63	2016-12-27	16:03:00
719	KAIT	2016-11-01 18:02:00	3.616	2016-11-02	07:02:00				719	KAIT	2016-12-27 03:04:00	2.643	2016-12-27	16:04:00
720	KAIT	2016-11-01 18:03:00	3.644	2016-11-02	07:03:00				720	KAIT	2016-12-27 03:05:00	2.649	2016-12-27	16:05:00
721	KAIT	2016-11-01 18:04:00	3.621	2016-11-02	07:04:00				721	KAIT	2016-12-27 03:06:00	2.632	2016-12-27	16:06:00
722	KAIT	2016-11-01 18:05:00	3.65	2016-11-02	07:05:00				722	KAIT	2016-12-27 03:07:00	2.634	2016-12-27	16:07:00
723	KAIT	2016-11-01 18:06:00	3.638	2016-11-02	07:06:00				723	KAIT	2016-12-27 03:08:00	2.637	2016-12-27	16:08:00
724	KAIT	2016-11-01 18:07:00	3.636	2016-11-02	07:07:00				724	KAIT	2016-12-27 03:09:00	2.648	2016-12-27	16:09:00
725	KAIT	2016-11-01 18:08:00	3.65	2016-11-02	07:08:00				725	KAIT	2016-12-27 03:10:00	2.648	2016-12-27	16:10:00
726	KAIT	2016-11-01 18:09:00	3.631	2016-11-02	07:09:00				726	KAIT	2016-12-27 03:11:00	2.63	2016-12-27	16:11:00
727	KAIT	2016-11-01 18:10:00	3.66	2016-11-02	07:10:00				727	KAIT	2016-12-27 03:12:00	2.627	2016-12-27	16:12:00
728	KAIT	2016-11-01 18:11:00	3.647	2016-11-02	07:11:00				728	KAIT	2016-12-27 03:13:00	2.625	2016-12-27	16:13:00
729	KAIT	2016-11-01 18:12:00	3.621	2016-11-02	07:12:00				729	KAIT	2016-12-27 03:14:00	2.642	2016-12-27	16:14:00
730	KAIT	2016-11-01 18:13:00	3.648	2016-11-02	07:13:00				730	KAIT	2016-12-27 03:15:00	2.656	2016-12-27	16:15:00
731	KAIT	2016-11-01 18:14:00	3.636	2016-11-02	07:14:00				731	KAIT	2016-12-27 03:16:00	2.638	2016-12-27	16:16:00
732	KAIT	2016-11-01 18:15:00	3.614	2016-11-02	07:15:00				732	KAIT	2016-12-27 03:17:00	2.64	2016-12-27	16:17:00
733	KAIT	2016-11-01 18:16:00	3.61	2016-11-02	07:16:00				733	KAIT	2016-12-27 03:18:00	2.634	2016-12-27	16:18:00
734	KAIT	2016-11-01 18:17:00	3.634	2016-11-02	07:17:00				734	KAIT	2016-12-27 03:19:00	2.644	2016-12-27	16:19:00
735	KAIT	2016-11-01 18:18:00	3.611	2016-11-02	07:18:00				735	KAIT	2016-12-27 03:20:00	2.633	2016-12-27	16:20:00
736	KAIT	2016-11-01 18:19:00	3.629	2016-11-02	07:19:00				736	KAIT	2016-12-27 03:21:00	2.638	2016-12-27	16:21:00
737	KAIT	2016-11-01 18:20:00	3.636	2016-11-02	07:20:00				737	KAIT	2016-12-27 03:22:00	2.63	2016-12-27	16:22:00
738	KAIT	2016-11-01 18:21:00	3.642	2016-11-02	07:21:00				738	KAIT	2016-12-27 03:23:00	2.622	2016-12-27	16:23:00
739	KAIT	2016-11-01 18:22:00	3.616	2016-11-02	07:22:00				739	KAIT	2016-12-27 03:24:00	2.613	2016-12-27	16:24:00
740	KAIT	2016-11-01 18:23:00	3.615	2016-11-02	07:23:00				740	KAIT	2016-12-27 03:25:00	2.621	2016-12-27	16:25:00
741	KAIT	2016-11-01 18:24:00	3.624	2016-11-02	07:24:00				741	KAIT	2016-12-27 03:26:00	2.64	2016-12-27	16:26:00
742	KAIT	2016-11-01 18:25:00	3.63	2016-11-02	07:25:00				742	KAIT	2016-12-27 03:27:00	2.649	2016-12-27	16:27:00
743	KAIT	2016-11-01 18:26:00	3.642	2016-11-02	07:26:00				743	KAIT	2016-12-27 03:28:00	2.663	2016-12-27	16:28:00
744	KAIT	2016-11-01 18:27:00	3.619	2016-11-02	07:27:00				744	KAIT	2016-12-27 03:29:00	2.677	2016-12-27	16:29:00
745	KAIT	2016-11-01 18:28:00	3.636	2016-11-02	07:28:00				745	KAIT	2016-12-27 03:30:00	2.686	2016-12-27	16:30:00
746	KAIT	2016-11-01 18:29:00	3.632	2016-11-02	07:29:00				746	KAIT	2016-12-27 03:31:00	2.683	2016-12-27	16:31:00
747	KAIT	2016-11-01 18:30:00	3.649	2016-11-02	07:30:00	HT 1.7			747	KAIT	2016-12-27 03:32:00	2.678	2016-12-27	16:32:00
748	KAIT	2016-11-01 18:31:00	3.632	2016-11-02	07:31:00				748	KAIT	2016-12-27 03:33:00	2.662	2016-12-27	16:33:00
749	KAIT	2016-11-01 18:32:00	3.638	2016-11-02	07:32:00				749	KAIT	2016-12-27 03:34:00	2.649	2016-12-27	16:34:00
750	KAIT	2016-11-01 18:33:00	3.643	2016-11-02	07:33:00				750	KAIT	2016-12-27 03:35:00	2.648	2016-12-27	16:35:00
751	KAIT	2016-11-01 18:34:00	3.637	2016-11-02	07:34:00				751	KAIT	2016-12-27 03:36:00	2.655	2016-12-27	16:36:00
752	KAIT	2016-11-01 18:35:00	3.643	2016-11-02	07:35:00				752	KAIT	2016-12-27 03:37:00	2.644	2016-12-27	16:37:00
753	KAIT	2016-11-01 18:36:00	3.635	2016-11-02	07:36:00				753	KAIT	2016-12-27 03:38:00	2.652	2016-12-27	16:38:00
754	KAIT	2016-11-01 18:37:00	3.645	2016-11-02	07:37:00				754	KAIT	2016-12-27 03:39:00	2.65	2016-12-27	16:39:00
755	KAIT	2016-11-01 18:38:00	3.65	2016-11-02	07:38:00				755	KAIT	2016-12-27 03:40:00	2.661	2016-12-27	16:40:00
756	KAIT	2016-11-01 18:39:00	3.636	2016-11-02	07:39:00				756	KAIT	2016-12-27 03:41:00	2.667	2016-12-27	16:41:00
757	KAIT	2016-11-01 18:40:00	3.652	2016-11-02	07:40:00				757	KAIT	2016-12-27 03:42:00	2.67	2016-12-27	16:42:00
758	KAIT	2016-11-01 18:41:00	3.656	2016-11-02	07:41:00				758	KAIT	2016-12-27 03:43:00	2.655	2016-12-27	16:43:00
759	KAIT	2016-11-01 18:42:00	3.647	2016-11-02	07:42:00				759	KAIT	2016-12-27 03:44:00	2.649	2016-12-27	16:44:00
760	KAIT	2016-11-01 18:43:00	3.654	2016-11-02	07:43:00				760	KAIT	2016-12-27 03:45:00	2.655	2016-12-27	16:45:00
761	KAIT	2016-11-01 18:44:00	3.631	2016-11-02	07:44:00				761	KAIT	2016-12-27 03:46:00	2.655	2016-12-27	16:46:00
762	KAIT	2016-11-01 18:45:00	3.64	2016-11-02	07:45:00				762	KAIT	2016-12-27 03:47:00	2.629	2016-12-27	16:47:00
763	KAIT	2016-11-01 18:46:00	3.641	2016-11-02	07:46:00				763	KAIT	2016-12-27 03:48:00	2.632	2016-12-27	16:48:00
764	KAIT	2016-11-01 18:47:00	3.651	2016-11-02	07:47:00				764	KAIT	2016-12-27 03:49:00	2.642	2016-12-27	16:49:00
765	KAIT	2016-11-01 18:48:00	3.626	2016-11-02	07:48:00				765	KAIT	2016-12-27 03:50:00	2.645	2016-12-27	16:50:00
766	KAIT	2016-11-01 18:49:00	3.634	2016-11-02	07:49:00				766	KAIT	2016-12-27 03:51:00	2.647	2016-12-27	16:51:00
767	KAIT	2016-11-01 18:50:00	3.645	2016-11-02	07:50:00				767	KAIT	2016-12-27 03:52:00	2.655	2016-12-27	16:52:00
768	KAIT	2016-11-01 18:51:00	3.641	2016-11-02	07:51:00				768	KAIT	2016-12-27 03:53:00	2.648	2016-12-27	16:53:00
769	KAIT	2016-11-01 18:52:00	3.613	2016-11-02	07:52:00				769	KAIT	2016-12-27 03:54:00	2.646	2016-12-27	16:54:00
770	KAIT	2016-11-01 18:53:00	3.616	2016-11-02	07:53:00				770	KAIT	2016-12-27 03:55:00	2.639	2016-12-27	16:55:00
771	KAIT	2016-11-01 18:54:00	3.615	2016-11-02	07:54:00				771	KAIT	2016-12-27 03:56:00	2.637	2016-12-27	16:56:00
772	KAIT	2016-11-01 18:55:00	3.636	2016-11-02	07:55:00				772	KAIT	2016-12-27 03:57:00	2.632	2016-12-27	16:57:00
773	KAIT	2016-11-01 18:56:00	3.619	2016-11-02	07:56:00				773	KAIT	2016-12-27 03:58:00	2.627	2016-12-27	16:58:00
774	KAIT	2016-11-01 18:57:00	3.594	2016-11-02	07:57:00				774	KAIT	2016-12-27 03:59:00	2.647	2016-12-27	16:59:00
775	KAIT	2016-11-01 18:58:00	3.6	2016-11-02	07:58:00				775	KAIT	2016-12-27 04:00:00	2.639	2016-12-27	17:00:00
776	KAIT	2016-11-01 18:59:00	3.633	2016-11-02	07:59:00				776	KAIT	2016-12-27 04:01:00	2.623	2016-12-27	17:01:00
777	KAIT	2016-11-01 19:00:00	3.602	2016-11-02	08:00:00				777	KAIT	2016-12-27 04:02:00	2.624	2016-12-27	17:02:00
778	KAIT	2016-11-01 19:01:00	3.602	2016-11-02	08:01:00				778	KAIT	2016-12-27 04:03:00	2.643	2016-12-27	17:03:00
779	KAIT	2016-11-01 19:02:00	3.61	2016-11-02	08:02:00				779	KAIT	2016-12-27 04:04:00	2.651	2016-12-27	17:04:00
780	KAIT	2016-11-01 19:03:00	3.595	2016-11-02	08:03:00				780	KAIT	2016-12-27 04:05:00	2.645	2016-12-27	17:05:00
781	KAIT	2016-11-01 19:04:00	3.596	2016-11-02	08:04:00				781	KAIT	2016-12-27 04:06:00	2.647	2016-12-27	17:06:00
782	KAIT	2016-11-01 19:05:00	3.595	2016-11-02	08:05:00				782	KAIT	2016-12-27 04:07:00	2.643	2016-12-27	17:07:00
783	KAIT	2016-11-01 19:06:00	3.604	2016-11-02	08:06:00				783	KAIT	2016-12-27 04:08:00	2.65	2016-12-27	17:08:00
784	KAIT	2016-11-01 19:07:00	3.634	2016-11-02	08:07:00				784	KAIT	2016-12-27 04:09:00	2.65	2016-12-27	17:09:00
785	KAIT	2016-11-01 19:08:00	3.612	2016-11-02	08:08:00				785	KAIT	2016-12-27 04:10:00	2.644	2016-12-27	17:10:00
786	KAIT	2016-11-01 19:09:00	3.599	2016-11-02	08:09:00				786	KAIT	2016-12-27 04:11:00	2.637	2016-12-27	17:11:00
787	KAIT	2016-11-01 19:10:00	3.599	2016-11-02	08:10:00				787	KAIT	2016-12-27 04:12:00	2.621	2016-12-27	17:12:00
788	KAIT	2016-11-01 19:11:00	3.602	2016-11-02	08:11:00				788	KAIT	2016-12-27 04:13:00	2.613	2016-12-27	17:13:00
789	KAIT	2016-11-01 19:12:00	3.609	2016-11-02	08:12:00				789	KAIT	2016-12-27 04:14:00	2.606	2016-12-27	17:14:00
790	KAIT	2016-11-01 19:13:00	3.601	2016-11-02	08:13:00				790	KAIT	2016-12-27 04:15:00	2.607	2016-12-27	17:15:00
791	KAIT	2016-11-01 19:14:00	3.609	2016-11-02	08:14:00				791	KAIT	2016-12-27 04:16:00	2.608	2016-12-27	17:16:00
792	KAIT	2016-11-01 19:15:00	3.59	2016-11-02	08:15:00				792	KAIT	2016-12-27 04:17:00	2.63	2016-12-27	17:17:00
793	KAIT	2016-11-01 19:16:00	3.605	2016-11-02	08:16:00				793	KAIT	2016-12-27 04:18:00	2.648	2016-12-27	17:18:00
794	KAIT	2016-11-01 19:17:00	3.603	2016-11-02	08:17:00				794	KAIT	2016-12-27 04:19:00	2.654	2016-12-27	17:19:00
795	KAIT	2016-11-01 19:18:00	3.569	2016-11-02	08:18:00				795	KAIT	2016-12-27 04:20:00	2.643	2016-12-27	17:20:00
796	KAIT	2016-11-01 19:19:00	3.579	2016-11-02	08:19:00				796	KAIT	2016-12-27 04:21:00	2.623	2016-12-27	17:21:00
797	KAIT	2016-11-01 19:20:00	3.596	2016-11-02	08:20:00				797	KAIT	2016-12-27 04:22:00	2.616	2016-12-27	17:22:00
798	KAIT	2016-11-01 19:21:00	3.584	2016-11-02	08:21:00				798	KAIT	2016-12-27 04:23:00	2.609	2016-12-27	17:23:00
799	KAIT	2016-11-01 19:22:00	3.601	2016-11-02	08:22:00				799	KAIT	2016-12-27 04:24:00	2.594	2016-12-27	17:24:00
800	KAIT	2016-11-01 19:23:00	3.591	2016-11-02	08:23:00				800	KAIT	2016-12-27 04:25:00	2.59	2016-12-27	17:25:00
801	KAIT	2016-11-01 19:24:00	3.587	2016-11-02	08:24:00				801	KAIT	2016-12-27 04:26:00	2.59	2016-12-27	17:26:00
802	KAIT	2016-11-01 19:25:00	3.56	2016-11-02	08:25:00				802	KAIT	2016-12-27 04:27:00	2.584	2016-12-27	17:27:00
803	KAIT	2016-11-01 19:26:00	3.576	2016-11-02	08:26:00				803	KAIT	2016-12-27 04:28:00	2.572	2016-12-27	17:28:00
804	KAIT	2016-11-01 19:27:00	3.575	2016-11-02	08:27:00				804	KAIT	2016-12-27 04:29:00	2.556	2016-12-27	17:29:00
805	KAIT	2016-11-01 19:28:00	3.588	2016-11-02	08:28:00				805	KAIT	2016-12-27 04:30:00	2.573	2016-12-27	17:30:00
806	KAIT	2016-11-01 19:29:00	3.577	2016-11-02	08:29:00				806	KAIT	2016-12-27 04:31:00	2.56	2016-12-27	17:31:00
807	KAIT	2016-11-01 19:30:00	3.546	2016-11-02	08:30:00				807	KAIT	2016-12-27 04:32:00	2.559	2016-12-27	17:32:00
808	KAIT	2016-11-01 19:31:00	3.563	2016-11-02	08:31:00				808	KAIT	2016-12-27 04:33:00	2.55	2016-12-27	17:33:00
809	KAIT	2016-11-01 19:32:00	3.579	2016-11-02	08:32:00				809	KAIT	2016-12-27 04:34:00	2.563	2016-12-27	17:34:00
810	KAIT	2016-11-01 19:33:00	3.545	2016-11-02	08:33:00				810	KAIT	2016-12-27 04:35:00	2.563	2016-12-27	17:35:00
811	KAIT	2016-11-01 19:34:00	3.566	2016-11-02	08:34:00				811	KAIT	2016-12-27 04:36:00	2.578	2016-12-27	17:36:00
812	KAIT	2016-11-01 19:35:00	3.546	2016-11-02	08:35:00				812	KAIT	2016-12-27 04:37:00	2.581	2016-12-27	17:37:00
813	KAIT	2016-11-01 19:36:00	3.548	2016-11-02	08:36:00				813	KAIT	2016-12-27 04:38:00	2.57	2016-12-27	17:38:00
814	KAIT	2016-11-01 19:37:00	3.528	2016-11-02	08:37:00				814	KAIT	2016-12-27 04:39:00	2.584	2016-12-27	17:39:00
815	KAIT	2016-11-01 19:38:00	3.536	2016-11-02	08:38:00				815	KAIT	2016-12-27 04:40:00	2.575	2016-12-27	17:40:00
816	KAIT	2016-11-01 19:39:00	3.522	2016-11-02	08:39:00				816	KAIT	2016-12-27 04:41:00	2.58	2016-12-27	17:41:00
817	KAIT	2016-11-01 19:40:00	3.539	2016-11-02	08:40:00				817	KAIT	2016-12-27 04:42:00	2.578	2016-12-27	17:42:00
818	KAIT	2016-11-01 19:41:00	3.498	2016-11-02	08:41:00				818	KAIT	2016-12-27 04:43:00	2.582	2016-12-27	17:43:00
819	KAIT	2016-11-01 19:42:00	3.511	2016-11-02	08:42:00				819	KAIT	2016-12-27 04:44:00	2.57	2016-12-27	17:44:00
820	KAIT	2016-11-01 19:43:00	3.511	2016-11-02	08:43:00				820	KAIT	2016-12-27 04:45:00	2.591	2016-12-27	17:45:00
821	KAIT	2016-11-01 19:44:00	3.525	2016-11-02	08:44:00				821	KAIT	2016-12-27 04:46:00	2.614	2016-12-27	17:46:00
822	KAIT	2016-11-01 19:45:00	3.494	2016-11-02	08:45:00				822	KAIT	2016-12-27 04:47:00	2.613	2016-12-27	17:47:00
823	KAIT	2016-11-01 19:46:00	3.529	2016-11-02	08:46:00				823	KAIT	2016-12-27 04:48:00	2.61	2016-12-27	17:48:00
824	KAIT	2016-11-01 19:47:00	3.487	2016-11-02	08:47:00				824	KAIT	2016-12-27 04:49:00	2.594	2016-12-27	17:49:00
825	KAIT	2016-11-01 19:48:00	3.502	2016-11-02	08:48:00				825	KAIT	2016-12-27 04:50:00	2.574	2016-12-27	17:50:00
826	KAIT	2016-11-01 19:49:00	3.509	2016-11-02	08:49:00				826	KAIT	2016-12-27 04:51:00	2.548	2016-12-27	17:51:00
827	KAIT	2016-11-01 19:50:00	3.522	2016-11-02	08:50:00				827	KAIT	2016-12-27 04:52:00	2.528	2016-12-27	17:52:00
828	KAIT	2016-11-01 19:51:00	3.501	2016-11-02	08:51:00				828	KAIT	2016-12-27 04:53:00	2.53	2016-12-27	17:53:00
829	KAIT	2016-11-01 19:52:00	3.523	2016-11-02	08:52:00				829	KAIT	2016-12-27 04:54:00	2.517	2016-12-27	17:54:00
830	KAIT	2016-11-01 19:53:00	3.508	2016-11-02	08:53:00				830	KAIT	2016-12-27 04:55:00	2.527	2016-12-27	17:55:00
831	KAIT	2016-11-01 19:54:00	3.486	2016-11-02	08:54:00				831	KAIT	2016-12-27 04:56:00	2.534	2016-12-27	17:56:00
832	KAIT	2016-11-01 19:55:00	3.496	2016-11-02	08:55:00				832	KAIT	2016-12-27 04:57:00	2.523	2016-12-27	17:57:00
833	KAIT	2016-11-01 19:56:00	3.494	2016-11-02	08:56:00				833	KAIT	2016-12-27 04:58:00	2.514	2016-12-27	17:58:00
834	KAIT	2016-11-01 19:57:00	3.494	2016-11-02	08:57:00				834	KAIT	2016-12-27 04:59:00	2.505	2016-12-27	17:59:00
835	KAIT	2016-11-01 19:58:00	3.485	2016-11-02	08:58:00				835	KAIT	2016-12-27 05:00:00	2.502	2016-12-27	18:00:00
836	KAIT	2016-11-01 19:59:00	3.475	2016-11-02	08:59:00				836	KAIT	2016-12-27 05:01:00	2.502	2016-12-27	18:01:00
837	KAIT	2016-11-01 20:00:00	3.494	2016-11-02	09:00:00				837	KAIT	2016-12-27 05:02:00	2.477	2016-12-27	18:02:00
838	KAIT	2016-11-01 20:01:00	3.486	2016-11-02	09:01:00				838	KAIT	2016-12-27 05:03:00	2.466	2016-12-27	18:03:00
839	KAIT	2016-11-01 20:02:00	3.467	2016-11-02	09:02:00				839	KAIT	2016-12-27 05:04:00	2.458	2016-12-27	18:04:00
840	KAIT	2016-11-01 20:03:00	3.467	2016-11-02	09:03:00				840	KAIT	2016-12-27 05:05:00	2.445	2016-12-27	18:05:00
841	KAIT	2016-11-01 20:04:00	3.468	2016-11-02	09:04:00				841	KAIT	2016-12-27 05:06:00	2.444	2016-12-27	18:06:00
842	KAIT	2016-11-01 20:05:00	3.46	2016-11-02	09:05:00				842	KAIT	2016-12-27 05:07:00	2.454	2016-12-27	18:07:00
843	KAIT	2016-11-01 20:06:00	3.436	2016-11-02	09:06:00				843	KAIT	2016-12-27 05:08:00	2.463	2016-12-27	18:08:00
844	KAIT	2016-11-01 20:07:00	3.429	2016-11-02	09:07:00				844	KAIT	2016-12-27 05:09:00	2.474	2016-12-27	18:09:00
845	KAIT	2016-11-01 20:08:00	3.44	2016-11-02	09:08:00				845	KAIT	2016-12-27 05:10:00	2.482	2016-12-27	18:10:00
846	KAIT	2016-11-01 20:09:00	3.406	2016-11-02	09:09:00				846	KAIT	2016-12-27 05:11:00	2.488	2016-12-27	18:11:00
847	KAIT	2016-11-01 20:10:00	3.437	2016-11-02	09:10:00				847	KAIT	2016-12-27 05:12:00	2.466	2016-12-27	18:12:00
848	KAIT	2016-11-01 20:11:00	3.397	2016-11-02	09:11:00				848	KAIT	2016-12-27 05:13:00	2.451	2016-12-27	18:13:00
849	KAIT	2016-11-01 20:12:00	3.41	2016-11-02	09:12:00				849	KAIT	2016-12-27 05:14:00	2.453	2016-12-27	18:14:00
850	KAIT	2016-11-01 20:13:00	3.404	2016-11-02	09:13:00				850	KAIT	2016-12-27 05:15:00	2.447	2016-12-27	18:15:00
851	KAIT	2016-11-01 20:14:00	3.425	2016-11-02	09:14:00				851	KAIT	2016-12-27 05:16:00	2.449	2016-12-27	18:16:00
852	KAIT	2016-11-01 20:15:00	3.396	2016-11-02	09:15:00				852	KAIT	2016-12-27 05:17:00	2.467	2016-12-27	18:17:00
853	KAIT	2016-11-01 20:16:00	3.402	2016-11-02	09:16:00				853	KAIT	2016-12-27 05:18:00	2.475	2016-12-27	18:18:00
854	KAIT	2016-11-01 20:17:00	3.399	2016-11-02	09:17:00				854	KAIT	2016-12-27 05:19:00	2.487	2016-12-27	18:19:00
855	KAIT	2016-11-01 20:18:00	3.421	2016-11-02	09:18:00				855	KAIT	2016-12-27 05:20:00	2.479	2016-12-27	18:20:00
856	KAIT	2016-11-01 20:19:00	3.407	2016-11-02	09:19:00				856	KAIT	2016-12-27 05:21:00	2.473	2016-12-27	18:21:00
857	KAIT	2016-11-01 20:20:00	3.375	2016-11-02	09:20:00				857	KAIT	2016-12-27 05:22:00	2.472	2016-12-27	18:22:00
858	KAIT	2016-11-01 20:21:00	3.396	2016-11-02	09:21:00				858	KAIT	2016-12-27 05:23:00	2.463	2016-12-27	18:23:00
859	KAIT	2016-11-01 20:22:00	3.396	2016-11-02	09:22:00				859	KAIT	2016-12-27 05:24:00	2.436	2016-12-27	18:24:00
860	KAIT	2016-11-01 20:23:00	3.372	2016-11-02	09:23:00				860	KAIT	2016-12-27 05:25:00	2.438	2016-12-27	18:25:00
861	KAIT	2016-11-01 20:24:00	3.371	2016-11-02	09:24:00				861	KAIT	2016-12-27 05:26:00	2.439	2016-12-27	18:26:00
862	KAIT	2016-11-01 20:25:00	3.374	2016-11-02	09:25:00				862	KAIT	2016-12-27 05:27:00	2.435	2016-12-27	18:27:00
863	KAIT	2016-11-01 20:26:00	3.375	2016-11-02	09:26:00				863	KAIT	2016-12-27 05:28:00	2.424	2016-12-27	18:28:00
864	KAIT	2016-11-01 20:27:00	3.36	2016-11-02	09:27:00				864	KAIT	2016-12-27 05:29:00	2.42	2016-12-27	18:29:00
865	KAIT	2016-11-01 20:28:00	3.36	2016-11-02	09:28:00				865	KAIT	2016-12-27 05:30:00	2.412	2016-12-27	18:30:00
866	KAIT	2016-11-01 20:29:00	3.367	2016-11-02	09:29:00				866	KAIT	2016-12-27 05:31:00	2.409	2016-12-27	18:31:00
867	KAIT	2016-11-01 20:30:00	3.357	2016-11-02	09:30:00				867	KAIT	2016-12-27 05:32:00	2.396	2016-12-27	18:32:00
868	KAIT	2016-11-01 20:31:00	3.37	2016-11-02	09:31:00				868	KAIT	2016-12-27 05:33:00	2.414	2016-12-27	18:33:00
869	KAIT	2016-11-01 20:32:00	3.343	2016-11-02	09:32:00				869	KAIT	2016-12-27 05:34:00	2.407	2016-12-27	18:34:00
870	KAIT	2016-11-01 20:33:00	3.37	2016-11-02	09:33:00				870	KAIT	2016-12-27 05:35:00	2.394	2016-12-27	18:35:00
871	KAIT	2016-11-01 20:34:00	3.332	2016-11-02	09:34:00				871	KAIT	2016-12-27 05:36:00	2.39	2016-12-27	18:36:00
872	KAIT	2016-11-01 20:35:00	3.341	2016-11-02	09:35:00				872	KAIT	2016-12-27 05:37:00	2.369	2016-12-27	18:37:00
873	KAIT	2016-11-01 20:36:00	3.333	2016-11-02	09:36:00				873	KAIT	2016-12-27 05:38:00	2.353	2016-12-27	18:38:00
874	KAIT	2016-11-01 20:37:00	3.316	2016-11-02	09:37:00				874	KAIT	2016-12-27 05:39:00	2.332	2016-12-27	18:39:00
875	KAIT	2016-11-01 20:38:00	3.323	2016-11-02	09:38:00				875	KAIT	2016-12-27 05:40:00	2.329	2016-12-27	18:40:00
876	KAIT	2016-11-01 20:39:00	3.326	2016-11-02	09:39:00				876	KAIT	2016-12-27 05:41:00	2.324	2016-12-27	18:41:00
877	KAIT	2016-11-01 20:40:00	3.314	2016-11-02	09:40:00				877	KAIT	2016-12-27 05:42:00	2.315	2016-12-27	18:42:00
878	KAIT	2016-11-01 20:41:00	3.317	2016-11-02	09:41:00				878	KAIT	2016-12-27 05:43:00	2.328	2016-12-27	18:43:00
879	KAIT	2016-11-01 20:42:00	3.304	2016-11-02	09:42:00				879	KAIT	2016-12-27 05:44:00	2.328	2016-12-27	18:44:00
880	KAIT	2016-11-01 20:43:00	3.298	2016-11-02	09:43:00				880	KAIT	2016-12-27 05:45:00	2.32	2016-12-27	18:45:00
881	KAIT	2016-11-01 20:44:00	3.306	2016-11-02	09:44:00				881	KAIT	2016-12-27 05:46:00	2.338	2016-12-27	18:46:00
882	KAIT	2016-11-01 20:45:00	3.262	2016-11-02	09:45:00				882	KAIT	2016-12-27 05:47:00	2.351	2016-12-27	18:47:00
883	KAIT	2016-11-01 20:46:00	3.279	2016-11-02	09:46:00				883	KAIT	2016-12-27 05:48:00	2.349	2016-12-27	18:48:00
884	KAIT	2016-11-01 20:47:00	3.282	2016-11-02	09:47:00				884	KAIT	2016-12-27 05:49:00	2.33	2016-12-27	18:49:00
885	KAIT	2016-11-01 20:48:00	3.253	2016-11-02	09:48:00				885	KAIT	2016-12-27 05:50:00	2.344	2016-12-27	18:50:00
886	KAIT	2016-11-01 20:49:00	3.251	2016-11-02	09:49:00				886	KAIT	2016-12-27 05:51:00	2.329	2016-12-27	18:51:00
887	KAIT	2016-11-01 20:50:00	3.232	2016-11-02	09:50:00				887	KAIT	2016-12-27 05:52:00	2.309	2016-12-27	18:52:00
888	KAIT	2016-11-01 20:51:00	3.26	2016-11-02	09:51:00				888	KAIT	2016-12-27 05:53:00	2.311	2016-12-27	18:53:00
889	KAIT	2016-11-01 20:52:00	3.249	2016-11-02	09:52:00				889	KAIT	2016-12-27 05:54:00	2.311	2016-12-27	18:54:00
890	KAIT	2016-11-01 20:53:00	3.245	2016-11-02	09:53:00				890	KAIT	2016-12-27 05:55:00	2.316	2016-12-27	18:55:00
891	KAIT	2016-11-01 20:54:00	3.235	2016-11-02	09:54:00				891	KAIT	2016-12-27 05:56:00	2.316	2016-12-27	18:56:00
892	KAIT	2016-11-01 20:55:00	3.23	2016-11-02	09:55:00				892	KAIT	2016-12-27 05:57:00	2.322	2016-12-27	18:57:00
893	KAIT	2016-11-01 20:56:00	3.227	2016-11-02	09:56:00				893	KAIT	2016-12-27 05:58:00	2.333	2016-12-27	18:58:00
894	KAIT	2016-11-01 20:57:00	3.227	2016-11-02	09:57:00				894	KAIT	2016-12-27 05:59:00	2.319	2016-12-27	18:59:00
895	KAIT	2016-11-01 20:58:00	3.219	2016-11-02	09:58:00				895	KAIT	2016-12-27 06:00:00	2.296	2016-12-27	19:00:00
896	KAIT	2016-11-01 20:59:00	3.22	2016-11-02	09:59:00				896	KAIT	2016-12-27 06:01:00	2.29	2016-12-27	19:01:00
897	KAIT	2016-11-01 21:00:00	3.212	2016-11-02	10:00:00				897	KAIT	2016-12-27 06:02:00	2.286	2016-12-27	19:02:00
898	KAIT	2016-11-01 21:01:00	3.24	2016-11-02	10:01:00				898	KAIT	2016-12-27 06:03:00	2.277	2016-12-27	19:03:00
899	KAIT	2016-11-01 21:02:00	3.228	2016-11-02	10:02:00				899	KAIT	2016-12-27 06:04:00	2.267	2016-12-27	19:04:00
900	KAIT	2016-11-01 21:03:00	3.215	2016-11-02	10:03:00				900	KAIT	2016-12-27 06:05:00	2.281	2016-12-27	19:05:00
901	KAIT	2016-11-01 21:04:00	3.23	2016-11-02	10:04:00				901	KAIT	2016-12-27 06:06:00	2.279	2016-12-27	19:06:00
902	KAIT	2016-11-01 21:05:00	3.192	2016-11-02	10:05:00				902	KAIT	2016-12-27 06:07:00	2.254	2016-12-27	19:07:00
903	KAIT	2016-11-01 21:06:00	3.195	2016-11-02	10:06:00				903	KAIT	2016-12-27 06:08:00	2.253	2016-12-27	19:08:00
904	KAIT	2016-11-01 21:07:00	3.188	2016-11-02	10:07:00				904	KAIT	2016-12-27 06:09:00	2.269	2016-12-27	19:09:00
905	KAIT	2016-11-01 21:08:00	3.179	2016-11-02	10:08:00				905	KAIT	2016-12-27 06:10:00	2.273	2016-12-27	19:10:00
906	KAIT	2016-11-01 21:09:00	3.19	2016-11-02	10:09:00				906	KAIT	2016-12-27 06:11:00	2.249	2016-12-27	19:11:00
907	KAIT	2016-11-01 21:10:00	3.171	2016-11-02	10:10:00				907	KAIT	2016-12-27 06:12:00	2.228	2016-12-27	19:12:00
908	KAIT	2016-11-01 21:11:00	3.181	2016-11-02	10:11:00				908	KAIT	2016-12-27 06:13:00	2.225	2016-12-27	19:13:00
909	KAIT	2016-11-01 21:12:00	3.168	2016-11-02	10:12:00				909	KAIT	2016-12-27 06:14:00	2.217	2016-12-27	19:14:00
910	KAIT	2016-11-01 21:13:00	3.184	2016-11-02	10:13:00				910	KAIT	2016-12-27 06:15:00	2.202	2016-12-27	19:15:00
911	KAIT	2016-11-01 21:14:00	3.148	2016-11-02	10:14:00				911	KAIT	2016-12-27 06:16:00	2.2	2016-12-27	19:16:00
912	KAIT	2016-11-01 21:15:00	3.165	2016-11-02	10:15:00				912	KAIT	2016-12-27 06:17:00	2.174	2016-12-27	19:17:00
913	KAIT	2016-11-01 21:16:00	3.151	2016-11-02	10:16:00				913	KAIT	2016-12-27 06:18:00	2.153	2016-12-27	19:18:00
914	KAIT	2016-11-01 21:17:00	3.139	2016-11-02	10:17:00				914	KAIT	2016-12-27 06:19:00	2.149	2016-12-27	19:19:00
915	KAIT	2016-11-01 21:18:00	3.139	2016-11-02	10:18:00				915	KAIT	2016-12-27 06:20:00	2.166	2016-12-27	19:20:00
916	KAIT	2016-11-01 21:19:00	3.124	2016-11-02	10:19:00				916	KAIT	2016-12-27 06:21:00	2.156	2016-12-27	19:21:00
917	KAIT	2016-11-01 21:20:00	3.098	2016-11-02	10:20:00				917	KAIT	2016-12-27 06:22:00	2.158	2016-12-27	19:22:00
918	KAIT	2016-11-01 21:21:00	3.102	2016-11-02	10:21:00				918	KAIT	2016-12-27 06:23:00	2.158	2016-12-27	19:23:00
919	KAIT	2016-11-01 21:22:00	3.098	2016-11-02	10:22:00				919	KAIT	2016-12-27 06:24:00	2.185	2016-12-27	19:24:00
920	KAIT	2016-11-01 21:23:00	3.08	2016-11-02	10:23:00				920	KAIT	2016-12-27 06:25:00	2.205	2016-12-27	19:25:00
921	KAIT	2016-11-01 21:24:00	3.1	2016-11-02	10:24:00				921	KAIT	2016-12-27 06:26:00	2.195	2016-12-27	19:26:00
922	KAIT	2016-11-01 21:25:00	3.081	2016-11-02	10:25:00				922	KAIT	2016-12-27 06:27:00	2.177	2016-12-27	19:27:00
923	KAIT	2016-11-01 21:26:00	3.068	2016-11-02	10:26:00				923	KAIT	2016-12-27 06:28:00	2.164	2016-12-27	19:28:00
924	KAIT	2016-11-01 21:27:00	3.076	2016-11-02	10:27:00				924	KAIT	2016-12-27 06:29:00	2.15	2016-12-27	19:29:00
925	KAIT	2016-11-01 21:28:00	3.084	2016-11-02	10:28:00				925	KAIT	2016-12-27 06:30:00	2.131	2016-12-27	19:30:00
926	KAIT	2016-11-01 21:29:00	3.055	2016-11-02	10:29:00				926	KAIT	2016-12-27 06:31:00	2.114	2016-12-27	19:31:00
927	KAIT	2016-11-01 21:30:00	3.056	2016-11-02	10:30:00				927	KAIT	2016-12-27 06:32:00	2.11	2016-12-27	19:32:00
928	KAIT	2016-11-01 21:31:00	3.08	2016-11-02	10:31:00				928	KAIT	2016-12-27 06:33:00	2.12	2016-12-27	19:33:00
929	KAIT	2016-11-01 21:32:00	3.073	2016-11-02	10:32:00				929	KAIT	2016-12-27 06:34:00	2.132	2016-12-27	19:34:00
930	KAIT	2016-11-01 21:33:00	3.047	2016-11-02	10:33:00				930	KAIT	2016-12-27 06:35:00	2.147	2016-12-27	19:35:00
931	KAIT	2016-11-01 21:34:00	3.064	2016-11-02	10:34:00				931	KAIT	2016-12-27 06:36:00	2.148	2016-12-27	19:36:00
932	KAIT	2016-11-01 21:35:00	3.049	2016-11-02	10:35:00				932	KAIT	2016-12-27 06:37:00	2.132	2016-12-27	19:37:00
933	KAIT	2016-11-01 21:36:00	3.041	2016-11-02	10:36:00				933	KAIT	2016-12-27 06:38:00	2.128	2016-12-27	19:38:00
934	KAIT	2016-11-01 21:37:00	3.055	2016-11-02	10:37:00				934	KAIT	2016-12-27 06:39:00	2.123	2016-12-27	19:39:00
935	KAIT	2016-11-01 21:38:00	3.055	2016-11-02	10:38:00				935	KAIT	2016-12-27 06:40:00	2.116	2016-12-27	19:40:00
936	KAIT	2016-11-01 21:39:00	3.002	2016-11-02	10:39:00				936	KAIT	2016-12-27 06:41:00	2.107	2016-12-27	19:41:00
937	KAIT	2016-11-01 21:40:00	3.059	2016-11-02	10:40:00				937	KAIT	2016-12-27 06:42:00	2.117	2016-12-27	19:42:00
938	KAIT	2016-11-01 21:41:00	3.01	2016-11-02	10:41:00				938	KAIT	2016-12-27 06:43:00	2.104	2016-12-27	19:43:00
939	KAIT	2016-11-01 21:42:00	3.006	2016-11-02	10:42:00				939	KAIT	2016-12-27 06:44:00	2.1	2016-12-27	19:44:00
940	KAIT	2016-11-01 21:43:00	3.023	2016-11-02	10:43:00				940	KAIT	2016-12-27 06:45:00	2.086	2016-12-27	19:45:00
941	KAIT	2016-11-01 21:44:00	3.004	2016-11-02	10:44:00				941	KAIT	2016-12-27 06:46:00	2.082	2016-12-27	19:46:00
942	KAIT	2016-11-01 21:45:00	3	2016-11-02	10:45:00				942	KAIT	2016-12-27 06:47:00	2.067	2016-12-27	19:47:00
943	KAIT	2016-11-01 21:46:00	2.988	2016-11-02	10:46:00				943	KAIT	2016-12-27 06:48:00	2.063	2016-12-27	19:48:00
944	KAIT	2016-11-01 21:47:00	2.989	2016-11-02	10:47:00				944	KAIT	2016-12-27 06:49:00	2.045	2016-12-27	19:49:00
945	KAIT	2016-11-01 21:48:00	2.98	2016-11-02	10:48:00				945	KAIT	2016-12-27 06:50:00	2.029	2016-12-27	19:50:00
946	KAIT	2016-11-01 21:49:00	2.97	2016-11-02	10:49:00				946	KAIT	2016-12-27 06:51:00	2.028	2016-12-27	19:51:00
947	KAIT	2016-11-01 21:50:00	2.996	2016-11-02	10:50:00				947	KAIT	2016-12-27 06:52:00	2.02	2016-12-27	19:52:00
948	KAIT	2016-11-01 21:51:00	2.98	2016-11-02	10:51:00				948	KAIT	2016-12-27 06:53:00	2.007	2016-12-27	19:53:00
949	KAIT	2016-11-01 21:52:00	2.991	2016-11-02	10:52:00				949	KAIT	2016-12-27 06:54:00	1.997	2016-12-27	19:54:00
950	KAIT	2016-11-01 21:53:00	2.939	2016-11-02	10:53:00				950	KAIT	2016-12-27 06:55:00	1.997	2016-12-27	19:55:00
951	KAIT	2016-11-01 21:54:00	2.965	2016-11-02	10:54:00				951	KAIT	2016-12-27 06:56:00	2.004	2016-12-27	19:56:00
952	KAIT	2016-11-01 21:55:00	2.952	2016-11-02	10:55:00				952	KAIT	2016-12-27 06:57:00	2.022	2016-12-27	19:57:00
953	KAIT	2016-11-01 21:56:00	2.923	2016-11-02	10:56:00				953	KAIT	2016-12-27 06:58:00	2.029	2016-12-27	19:58:00
954	KAIT	2016-11-01 21:57:00	2.939	2016-11-02	10:57:00				954	KAIT	2016-12-27 06:59:00	2.05	2016-12-27	19:59:00
955	KAIT	2016-11-01 21:58:00	2.937	2016-11-02	10:58:00				955	KAIT	2016-12-27 07:00:00	2.058	2016-12-27	20:00:00
956	KAIT	2016-11-01 21:59:00	2.922	2016-11-02	10:59:00				956	KAIT	2016-12-27 07:01:00	2.07	2016-12-27	20:01:00
957	KAIT	2016-11-01 22:00:00	2.925	2016-11-02	11:00:00				957	KAIT	2016-12-27 07:02:00	2.062	2016-12-27	20:02:00
958	KAIT	2016-11-01 22:01:00	2.918	2016-11-02	11:01:00				958	KAIT	2016-12-27 07:03:00	2.032	2016-12-27	20:03:00
959	KAIT	2016-11-01 22:02:00	2.926	2016-11-02	11:02:00				959	KAIT	2016-12-27 07:04:00	2.003	2016-12-27	20:04:00
960	KAIT	2016-11-01 22:03:00	2.907	2016-11-02	11:03:00				960	KAIT	2016-12-27 07:05:00	1.988	2016-12-27	20:05:00
961	KAIT	2016-11-01 22:04:00	2.916	2016-11-02	11:04:00				961	KAIT	2016-12-27 07:06:00	1.972	2016-12-27	20:06:00
962	KAIT	2016-11-01 22:05:00	2.895	2016-11-02	11:05:00				962	KAIT	2016-12-27 07:07:00	1.972	2016-12-27	20:07:00
963	KAIT	2016-11-01 22:06:00	2.893	2016-11-02	11:06:00				963	KAIT	2016-12-27 07:08:00	1.968	2016-12-27	20:08:00
964	KAIT	2016-11-01 22:07:00	2.895	2016-11-02	11:07:00				964	KAIT	2016-12-27 07:09:00	1.982	2016-12-27	20:09:00
965	KAIT	2016-11-01 22:08:00	2.892	2016-11-02	11:08:00				965	KAIT	2016-12-27 07:10:00	1.982	2016-12-27	20:10:00
966	KAIT	2016-11-01 22:09:00	2.91	2016-11-02	11:09:00				966	KAIT	2016-12-27 07:11:00	1.984	2016-12-27	20:11:00
967	KAIT	2016-11-01 22:10:00	2.868	2016-11-02	11:10:00				967	KAIT	2016-12-27 07:12:00	1.979	2016-12-27	20:12:00
968	KAIT	2016-11-01 22:11:00	2.858	2016-11-02	11:11:00				968	KAIT	2016-12-27 07:13:00	1.97	2016-12-27	20:13:00
969	KAIT	2016-11-01 22:12:00	2.871	2016-11-02	11:12:00				969	KAIT	2016-12-27 07:14:00	1.968	2016-12-27	20:14:00
970	KAIT	2016-11-01 22:13:00	2.871	2016-11-02	11:13:00				970	KAIT	2016-12-27 07:15:00	1.963	2016-12-27	20:15:00
971	KAIT	2016-11-01 22:14:00	2.858	2016-11-02	11:14:00				971	KAIT	2016-12-27 07:16:00	1.951	2016-12-27	20:16:00
972	KAIT	2016-11-01 22:15:00	2.847	2016-11-02	11:15:00				972	KAIT	2016-12-27 07:17:00	1.951	2016-12-27	20:17:00
973	KAIT	2016-11-01 22:16:00	2.861	2016-11-02	11:16:00				973	KAIT	2016-12-27 07:18:00	1.952	2016-12-27	20:18:00
974	KAIT	2016-11-01 22:17:00	2.848	2016-11-02	11:17:00				974	KAIT	2016-12-27 07:19:00	1.955	2016-12-27	20:19:00
975	KAIT	2016-11-01 22:18:00	2.857	2016-11-02	11:18:00				975	KAIT	2016-12-27 07:20:00	1.947	2016-12-27	20:20:00
976	KAIT	2016-11-01 22:19:00	2.826	2016-11-02	11:19:00				976	KAIT	2016-12-27 07:21:00	1.935	2016-12-27	20:21:00
977	KAIT	2016-11-01 22:20:00	2.845	2016-11-02	11:20:00				977	KAIT	2016-12-27 07:22:00	1.921	2016-12-27	20:22:00
978	KAIT	2016-11-01 22:21:00	2.831	2016-11-02	11:21:00				978	KAIT	2016-12-27 07:23:00	1.907	2016-12-27	20:23:00
979	KAIT	2016-11-01 22:22:00	2.842	2016-11-02	11:22:00				979	KAIT	2016-12-27 07:24:00	1.903	2016-12-27	20:24:00
980	KAIT	2016-11-01 22:23:00	2.837	2016-11-02	11:23:00				980	KAIT	2016-12-27 07:25:00	1.902	2016-12-27	20:25:00
981	KAIT	2016-11-01 22:24:00	2.826	2016-11-02	11:24:00				981	KAIT	2016-12-27 07:26:00	1.886	2016-12-27	20:26:00
982	KAIT	2016-11-01 22:25:00	2.821	2016-11-02	11:25:00				982	KAIT	2016-12-27 07:27:00	1.88	2016-12-27	20:27:00
983	KAIT	2016-11-01 22:26:00	2.826	2016-11-02	11:26:00				983	KAIT	2016-12-27 07:28:00	1.895	2016-12-27	20:28:00
984	KAIT	2016-11-01 22:27:00	2.827	2016-11-02	11:27:00				984	KAIT	2016-12-27 07:29:00	1.889	2016-12-27	20:29:00
985	KAIT	2016-11-01 22:28:00	2.798	2016-11-02	11:28:00				985	KAIT	2016-12-27 07:30:00	1.897	2016-12-27	20:30:00
986	KAIT	2016-11-01 22:29:00	2.796	2016-11-02	11:29:00				986	KAIT	2016-12-27 07:31:00	1.884	2016-12-27	20:31:00
987	KAIT	2016-11-01 22:30:00	2.804	2016-11-02	11:30:00				987	KAIT	2016-12-27 07:32:00	1.871	2016-12-27	20:32:00
988	KAIT	2016-11-01 22:31:00	2.792	2016-11-02	11:31:00				988	KAIT	2016-12-27 07:33:00	1.871	2016-12-27	20:33:00
989	KAIT	2016-11-01 22:32:00	2.797	2016-11-02	11:32:00				989	KAIT	2016-12-27 07:34:00	1.856	2016-12-27	20:34:00
990	KAIT	2016-11-01 22:33:00	2.798	2016-11-02	11:33:00				990	KAIT	2016-12-27 07:35:00	1.841	2016-12-27	20:35:00
991	KAIT	2016-11-01 22:34:00	2.765	2016-11-02	11:34:00				991	KAIT	2016-12-27 07:36:00	1.842	2016-12-27	20:36:00
992	KAIT	2016-11-01 22:35:00	2.757	2016-11-02	11:35:00				992	KAIT	2016-12-27 07:37:00	1.825	2016-12-27	20:37:00
993	KAIT	2016-11-01 22:36:00	2.777	2016-11-02	11:36:00				993	KAIT	2016-12-27 07:38:00	1.838	2016-12-27	20:38:00
994	KAIT	2016-11-01 22:37:00	2.745	2016-11-02	11:37:00				994	KAIT	2016-12-27 07:39:00	1.849	2016-12-27	20:39:00
995	KAIT	2016-11-01 22:38:00	2.761	2016-11-02	11:38:00				995	KAIT	2016-12-27 07:40:00	1.855	2016-12-27	20:40:00
996	KAIT	2016-11-01 22:39:00	2.745	2016-11-02	11:39:00				996	KAIT	2016-12-27 07:41:00	1.843	2016-12-27	20:41:00
997	KAIT	2016-11-01 22:40:00	2.752	2016-11-02	11:40:00				997	KAIT	2016-12-27 07:42:00	1.827	2016-12-27	20:42:00
998	KAIT	2016-11-01 22:41:00	2.739	2016-11-02	11:41:00				998	KAIT	2016-12-27 07:43:00	1.819	2016-12-27	20:43:00
999	KAIT	2016-11-01 22:42:00	2.721	2016-11-02	11:42:00				999	KAIT	2016-12-27 07:44:00	1.822	2016-12-27	20:44:00
1000	KAIT	2016-11-01 22:43:00	2.711	2016-11-02	11:43:00				1000	KAIT	2016-12-27 07:45:00	1.842	2016-12-27	20:45:00
1001	KAIT	2016-11-01 22:44:00	2.709	2016-11-02	11:44:00				1001	KAIT	2016-12-27 07:46:00	1.831	2016-12-27	20:46:00
1002	KAIT	2016-11-01 22:45:00	2.738	2016-11-02	11:45:00				1002	KAIT	2016-12-27 07:47:00	1.826	2016-12-27	20:47:00
1003	KAIT	2016-11-01 22:46:00	2.713	2016-11-02	11:46:00				1003	KAIT	2016-12-27 07:48:00	1.835	2016-12-27	20:48:00
1004	KAIT	2016-11-01 22:47:00	2.694	2016-11-02	11:47:00				1004	KAIT	2016-12-27 07:49:00	1.851	2016-12-27	20:49:00
1005	KAIT	2016-11-01 22:48:00	2.708	2016-11-02	11:48:00				1005	KAIT	2016-12-27 07:50:00	1.858	2016-12-27	20:50:00
1006	KAIT	2016-11-01 22:49:00	2.71	2016-11-02	11:49:00				1006	KAIT	2016-12-27 07:51:00	1.862	2016-12-27	20:51:00
1007	KAIT	2016-11-01 22:50:00	2.706	2016-11-02	11:50:00				1007	KAIT	2016-12-27 07:52:00	1.856	2016-12-27	20:52:00
1008	KAIT	2016-11-01 22:51:00	2.703	2016-11-02	11:51:00				1008	KAIT	2016-12-27 07:53:00	1.84	2016-12-27	20:53:00
1009	KAIT	2016-11-01 22:52:00	2.68	2016-11-02	11:52:00				1009	KAIT	2016-12-27 07:54:00	1.834	2016-12-27	20:54:00
1010	KAIT	2016-11-01 22:53:00	2.715	2016-11-02	11:53:00				1010	KAIT	2016-12-27 07:55:00	1.835	2016-12-27	20:55:00
1011	KAIT	2016-11-01 22:54:00	2.698	2016-11-02	11:54:00				1011	KAIT	2016-12-27 07:56:00	1.827	2016-12-27	20:56:00
1012	KAIT	2016-11-01 22:55:00	2.708	2016-11-02	11:55:00				1012	KAIT	2016-12-27 07:57:00	1.803	2016-12-27	20:57:00
1013	KAIT	2016-11-01 22:56:00	2.715	2016-11-02	11:56:00				1013	KAIT	2016-12-27 07:58:00	1.782	2016-12-27	20:58:00
1014	KAIT	2016-11-01 22:57:00	2.706	2016-11-02	11:57:00				1014	KAIT	2016-12-27 07:59:00	1.768	2016-12-27	20:59:00
1015	KAIT	2016-11-01 22:58:00	2.666	2016-11-02	11:58:00				1015	KAIT	2016-12-27 08:00:00	1.765	2016-12-27	21:00:00
1016	KAIT	2016-11-01 22:59:00	2.694	2016-11-02	11:59:00				1016	KAIT	2016-12-27 08:01:00	1.772	2016-12-27	21:01:00
1017	KAIT	2016-11-01 23:00:00	2.672	2016-11-02	12:00:00				1017	KAIT	2016-12-27 08:02:00	1.768	2016-12-27	21:02:00
1018	KAIT	2016-11-01 23:01:00	2.689	2016-11-02	12:01:00				1018	KAIT	2016-12-27 08:03:00	1.744	2016-12-27	21:03:00
1019	KAIT	2016-11-01 23:02:00	2.677	2016-11-02	12:02:00				1019	KAIT	2016-12-27 08:04:00	1.74	2016-12-27	21:04:00
1020	KAIT	2016-11-01 23:03:00	2.68	2016-11-02	12:03:00				1020	KAIT	2016-12-27 08:05:00	1.754	2016-12-27	21:05:00
1021	KAIT	2016-11-01 23:04:00	2.665	2016-11-02	12:04:00				1021	KAIT	2016-12-27 08:06:00	1.749	2016-12-27	21:06:00
1022	KAIT	2016-11-01 23:05:00	2.653	2016-11-02	12:05:00				1022	KAIT	2016-12-27 08:07:00	1.725	2016-12-27	21:07:00
1023	KAIT	2016-11-01 23:06:00	2.651	2016-11-02	12:06:00				1023	KAIT	2016-12-27 08:08:00	1.727	2016-12-27	21:08:00
1024	KAIT	2016-11-01 23:07:00	2.671	2016-11-02	12:07:00				1024	KAIT	2016-12-27 08:09:00	1.741	2016-12-27	21:09:00
1025	KAIT	2016-11-01 23:08:00	2.65	2016-11-02	12:08:00				1025	KAIT	2016-12-27 08:10:00	1.76	2016-12-27	21:10:00
1026	KAIT	2016-11-01 23:09:00	2.635	2016-11-02	12:09:00				1026	KAIT	2016-12-27 08:11:00	1.758	2016-12-27	21:11:00
1027	KAIT	2016-11-01 23:10:00	2.642	2016-11-02	12:10:00				1027	KAIT	2016-12-27 08:12:00	1.743	2016-12-27	21:12:00
1028	KAIT	2016-11-01 23:11:00	2.664	2016-11-02	12:11:00				1028	KAIT	2016-12-27 08:13:00	1.75	2016-12-27	21:13:00
1029	KAIT	2016-11-01 23:12:00	2.639	2016-11-02	12:12:00				1029	KAIT	2016-12-27 08:14:00	1.741	2016-12-27	21:14:00
1030	KAIT	2016-11-01 23:13:00	2.616	2016-11-02	12:13:00				1030	KAIT	2016-12-27 08:15:00	1.739	2016-12-27	21:15:00
1031	KAIT	2016-11-01 23:14:00	2.636	2016-11-02	12:14:00				1031	KAIT	2016-12-27 08:16:00	1.738	2016-12-27	21:16:00
1032	KAIT	2016-11-01 23:15:00	2.651	2016-11-02	12:15:00				1032	KAIT	2016-12-27 08:17:00	1.721	2016-12-27	21:17:00
1033	KAIT	2016-11-01 23:16:00	2.579	2016-11-02	12:16:00				1033	KAIT	2016-12-27 08:18:00	1.728	2016-12-27	21:18:00
1034	KAIT	2016-11-01 23:17:00	2.619	2016-11-02	12:17:00				1034	KAIT	2016-12-27 08:19:00	1.715	2016-12-27	21:19:00
1035	KAIT	2016-11-01 23:18:00	2.604	2016-11-02	12:18:00				1035	KAIT	2016-12-27 08:20:00	1.73	2016-12-27	21:20:00
1036	KAIT	2016-11-01 23:19:00	2.614	2016-11-02	12:19:00				1036	KAIT	2016-12-27 08:21:00	1.725	2016-12-27	21:21:00
1037	KAIT	2016-11-01 23:20:00	2.617	2016-11-02	12:20:00				1037	KAIT	2016-12-27 08:22:00	1.733	2016-12-27	21:22:00
1038	KAIT	2016-11-01 23:21:00	2.608	2016-11-02	12:21:00				1038	KAIT	2016-12-27 08:23:00	1.736	2016-12-27	21:23:00
1039	KAIT	2016-11-01 23:22:00	2.617	2016-11-02	12:22:00				1039	KAIT	2016-12-27 08:24:00	1.738	2016-12-27	21:24:00
1040	KAIT	2016-11-01 23:23:00	2.619	2016-11-02	12:23:00				1040	KAIT	2016-12-27 08:25:00	1.745	2016-12-27	21:25:00
1041	KAIT	2016-11-01 23:24:00	2.583	2016-11-02	12:24:00				1041	KAIT	2016-12-27 08:26:00	1.743	2016-12-27	21:26:00
1042	KAIT	2016-11-01 23:25:00	2.592	2016-11-02	12:25:00				1042	KAIT	2016-12-27 08:27:00	1.731	2016-12-27	21:27:00
1043	KAIT	2016-11-01 23:26:00	2.607	2016-11-02	12:26:00				1043	KAIT	2016-12-27 08:28:00	1.725	2016-12-27	21:28:00
1044	KAIT	2016-11-01 23:27:00	2.596	2016-11-02	12:27:00				1044	KAIT	2016-12-27 08:29:00	1.72	2016-12-27	21:29:00
1045	KAIT	2016-11-01 23:28:00	2.6	2016-11-02	12:28:00				1045	KAIT	2016-12-27 08:30:00	1.693	2016-12-27	21:30:00
1046	KAIT	2016-11-01 23:29:00	2.567	2016-11-02	12:29:00				1046	KAIT	2016-12-27 08:31:00	1.673	2016-12-27	21:31:00
1047	KAIT	2016-11-01 23:30:00	2.564	2016-11-02	12:30:00				1047	KAIT	2016-12-27 08:32:00	1.66	2016-12-27	21:32:00
1048	KAIT	2016-11-01 23:31:00	2.577	2016-11-02	12:31:00				1048	KAIT	2016-12-27 08:33:00	1.672	2016-12-27	21:33:00
1049	KAIT	2016-11-01 23:32:00	2.577	2016-11-02	12:32:00				1049	KAIT	2016-12-27 08:34:00	1.664	2016-12-27	21:34:00
1050	KAIT	2016-11-01 23:33:00	2.573	2016-11-02	12:33:00				1050	KAIT	2016-12-27 08:35:00	1.652	2016-12-27	21:35:00
1051	KAIT	2016-11-01 23:34:00	2.578	2016-11-02	12:34:00				1051	KAIT	2016-12-27 08:36:00	1.645	2016-12-27	21:36:00
1052	KAIT	2016-11-01 23:35:00	2.567	2016-11-02	12:35:00				1052	KAIT	2016-12-27 08:37:00	1.655	2016-12-27	21:37:00
1053	KAIT	2016-11-01 23:36:00	2.588	2016-11-02	12:36:00				1053	KAIT	2016-12-27 08:38:00	1.659	2016-12-27	21:38:00
1054	KAIT	2016-11-01 23:37:00	2.566	2016-11-02	12:37:00				1054	KAIT	2016-12-27 08:39:00	1.655	2016-12-27	21:39:00
1055	KAIT	2016-11-01 23:38:00	2.55	2016-11-02	12:38:00				1055	KAIT	2016-12-27 08:40:00	1.65	2016-12-27	21:40:00
1056	KAIT	2016-11-01 23:39:00	2.575	2016-11-02	12:39:00				1056	KAIT	2016-12-27 08:41:00	1.651	2016-12-27	21:41:00
1057	KAIT	2016-11-01 23:40:00	2.546	2016-11-02	12:40:00				1057	KAIT	2016-12-27 08:42:00	1.645	2016-12-27	21:42:00
1058	KAIT	2016-11-01 23:41:00	2.584	2016-11-02	12:41:00				1058	KAIT	2016-12-27 08:43:00	1.646	2016-12-27	21:43:00
1059	KAIT	2016-11-01 23:42:00	2.559	2016-11-02	12:42:00				1059	KAIT	2016-12-27 08:44:00	1.643	2016-12-27	21:44:00
1060	KAIT	2016-11-01 23:43:00	2.571	2016-11-02	12:43:00				1060	KAIT	2016-12-27 08:45:00	1.651	2016-12-27	21:45:00
1061	KAIT	2016-11-01 23:44:00	2.557	2016-11-02	12:44:00				1061	KAIT	2016-12-27 08:46:00	1.653	2016-12-27	21:46:00
1062	KAIT	2016-11-01 23:45:00	2.539	2016-11-02	12:45:00				1062	KAIT	2016-12-27 08:47:00	1.638	2016-12-27	21:47:00
1063	KAIT	2016-11-01 23:46:00	2.574	2016-11-02	12:46:00				1063	KAIT	2016-12-27 08:48:00	1.635	2016-12-27	21:48:00
1064	KAIT	2016-11-01 23:47:00	2.529	2016-11-02	12:47:00				1064	KAIT	2016-12-27 08:49:00	1.632	2016-12-27	21:49:00
1065	KAIT	2016-11-01 23:48:00	2.524	2016-11-02	12:48:00				1065	KAIT	2016-12-27 08:50:00	1.633	2016-12-27	21:50:00
1066	KAIT	2016-11-01 23:49:00	2.547	2016-11-02	12:49:00				1066	KAIT	2016-12-27 08:51:00	1.623	2016-12-27	21:51:00
1067	KAIT	2016-11-01 23:50:00	2.541	2016-11-02	12:50:00				1067	KAIT	2016-12-27 08:52:00	1.608	2016-12-27	21:52:00
1068	KAIT	2016-11-01 23:51:00	2.514	2016-11-02	12:51:00				1068	KAIT	2016-12-27 08:53:00	1.602	2016-12-27	21:53:00
1069	KAIT	2016-11-01 23:52:00	2.537	2016-11-02	12:52:00				1069	KAIT	2016-12-27 08:54:00	1.609	2016-12-27	21:54:00
1070	KAIT	2016-11-01 23:53:00	2.518	2016-11-02	12:53:00				1070	KAIT	2016-12-27 08:55:00	1.62	2016-12-27	21:55:00
1071	KAIT	2016-11-01 23:54:00	2.525	2016-11-02	12:54:00				1071	KAIT	2016-12-27 08:56:00	1.612	2016-12-27	21:56:00
1072	KAIT	2016-11-01 23:55:00	2.496	2016-11-02	12:55:00				1072	KAIT	2016-12-27 08:57:00	1.61	2016-12-27	21:57:00
1073	KAIT	2016-11-01 23:56:00	2.533	2016-11-02	12:56:00				1073	KAIT	2016-12-27 08:58:00	1.626	2016-12-27	21:58:00
1074	KAIT	2016-11-01 23:57:00	2.514	2016-11-02	12:57:00				1074	KAIT	2016-12-27 08:59:00	1.64	2016-12-27	21:59:00
1075	KAIT	2016-11-01 23:58:00	2.511	2016-11-02	12:58:00				1075	KAIT	2016-12-27 09:00:00	1.638	2016-12-27	22:00:00
1076	KAIT	2016-11-01 23:59:00	2.513	2016-11-02	12:59:00				1076	KAIT	2016-12-27 09:01:00	1.644	2016-12-27	22:01:00
1077	KAIT	2016-11-02	2.493	2016-11-02	13:00:00				1077	KAIT	2016-12-27 09:02:00	1.651	2016-12-27	22:02:00
1078	KAIT	2016-11-02 00:01:00	2.533	2016-11-02	13:01:00				1078	KAIT	2016-12-27 09:03:00	1.641	2016-12-27	22:03:00
1079	KAIT	2016-11-02 00:02:00	2.516	2016-11-02	13:02:00				1079	KAIT	2016-12-27 09:04:00	1.618	2016-12-27	22:04:00
1080	KAIT	2016-11-02 00:03:00	2.515	2016-11-02	13:03:00				1080	KAIT	2016-12-27 09:05:00	1.614	2016-12-27	22:05:00
1081	KAIT	2016-11-02 00:04:00	2.494	2016-11-02	13:04:00				1081	KAIT	2016-12-27 09:06:00	1.62	2016-12-27	22:06:00
1082	KAIT	2016-11-02 00:05:00	2.495	2016-11-02	13:05:00				1082	KAIT	2016-12-27 09:07:00	1.601	2016-12-27	22:07:00
1083	KAIT	2016-11-02 00:06:00	2.496	2016-11-02	13:06:00				1083	KAIT	2016-12-27 09:08:00	1.594	2016-12-27	22:08:00
1084	KAIT	2016-11-02 00:07:00	2.512	2016-11-02	13:07:00				1084	KAIT	2016-12-27 09:09:00	1.584	2016-12-27	22:09:00
1085	KAIT	2016-11-02 00:08:00	2.498	2016-11-02	13:08:00				1085	KAIT	2016-12-27 09:10:00	1.597	2016-12-27	22:10:00
1086	KAIT	2016-11-02 00:09:00	2.525	2016-11-02	13:09:00				1086	KAIT	2016-12-27 09:11:00	1.598	2016-12-27	22:11:00
1087	KAIT	2016-11-02 00:10:00	2.454	2016-11-02	13:10:00				1087	KAIT	2016-12-27 09:12:00	1.595	2016-12-27	22:12:00
1088	KAIT	2016-11-02 00:11:00	2.495	2016-11-02	13:11:00				1088	KAIT	2016-12-27 09:13:00	1.593	2016-12-27	22:13:00
1089	KAIT	2016-11-02 00:12:00	2.498	2016-11-02	13:12:00				1089	KAIT	2016-12-27 09:14:00	1.58	2016-12-27	22:14:00
1090	KAIT	2016-11-02 00:13:00	2.494	2016-11-02	13:13:00				1090	KAIT	2016-12-27 09:15:00	1.571	2016-12-27	22:15:00
1091	KAIT	2016-11-02 00:14:00	2.482	2016-11-02	13:14:00				1091	KAIT	2016-12-27 09:16:00	1.575	2016-12-27	22:16:00
1092	KAIT	2016-11-02 00:15:00	2.451	2016-11-02	13:15:00				1092	KAIT	2016-12-27 09:17:00	1.577	2016-12-27	22:17:00
1093	KAIT	2016-11-02 00:16:00	2.491	2016-11-02	13:16:00				1093	KAIT	2016-12-27 09:18:00	1.566	2016-12-27	22:18:00
1094	KAIT	2016-11-02 00:17:00	2.452	2016-11-02	13:17:00				1094	KAIT	2016-12-27 09:19:00	1.567	2016-12-27	22:19:00
1095	KAIT	2016-11-02 00:18:00	2.486	2016-11-02	13:18:00				1095	KAIT	2016-12-27 09:20:00	1.578	2016-12-27	22:20:00
1096	KAIT	2016-11-02 00:19:00	2.474	2016-11-02	13:19:00				1096	KAIT	2016-12-27 09:21:00	1.577	2016-12-27	22:21:00
1097	KAIT	2016-11-02 00:20:00	2.468	2016-11-02	13:20:00				1097	KAIT	2016-12-27 09:22:00	1.578	2016-12-27	22:22:00
1098	KAIT	2016-11-02 00:21:00	2.461	2016-11-02	13:21:00				1098	KAIT	2016-12-27 09:23:00	1.578	2016-12-27	22:23:00
1099	KAIT	2016-11-02 00:22:00	2.475	2016-11-02	13:22:00				1099	KAIT	2016-12-27 09:24:00	1.56	2016-12-27	22:24:00
1100	KAIT	2016-11-02 00:23:00	2.493	2016-11-02	13:23:00				1100	KAIT	2016-12-27 09:25:00	1.565	2016-12-27	22:25:00
1101	KAIT	2016-11-02 00:24:00	2.485	2016-11-02	13:24:00				1101	KAIT	2016-12-27 09:26:00	1.556	2016-12-27	22:26:00
1102	KAIT	2016-11-02 00:25:00	2.471	2016-11-02	13:25:00				1102	KAIT	2016-12-27 09:27:00	1.544	2016-12-27	22:27:00
1103	KAIT	2016-11-02 00:26:00	2.473	2016-11-02	13:26:00				1103	KAIT	2016-12-27 09:28:00	1.546	2016-12-27	22:28:00
1104	KAIT	2016-11-02 00:27:00	2.431	2016-11-02	13:27:00				1104	KAIT	2016-12-27 09:29:00	1.567	2016-12-27	22:29:00
1105	KAIT	2016-11-02 00:28:00	2.471	2016-11-02	13:28:00				1105	KAIT	2016-12-27 09:30:00	1.586	2016-12-27	22:30:00
1106	KAIT	2016-11-02 00:29:00	2.504	2016-11-02	13:29:00				1106	KAIT	2016-12-27 09:31:00	1.582	2016-12-27	22:31:00
1107	KAIT	2016-11-02 00:30:00	2.483	2016-11-02	13:30:00				1107	KAIT	2016-12-27 09:32:00	1.587	2016-12-27	22:32:00
1108	KAIT	2016-11-02 00:31:00	2.47	2016-11-02	13:31:00				1108	KAIT	2016-12-27 09:33:00	1.576	2016-12-27	22:33:00
1109	KAIT	2016-11-02 00:32:00	2.466	2016-11-02	13:32:00				1109	KAIT	2016-12-27 09:34:00	1.577	2016-12-27	22:34:00
1110	KAIT	2016-11-02 00:33:00	2.48	2016-11-02	13:33:00				1110	KAIT	2016-12-27 09:35:00	1.565	2016-12-27	22:35:00
1111	KAIT	2016-11-02 00:34:00	2.475	2016-11-02	13:34:00				1111	KAIT	2016-12-27 09:36:00	1.561	2016-12-27	22:36:00
1112	KAIT	2016-11-02 00:35:00	2.478	2016-11-02	13:35:00				1112	KAIT	2016-12-27 09:37:00	1.554	2016-12-27	22:37:00
1113	KAIT	2016-11-02 00:36:00	2.485	2016-11-02	13:36:00				1113	KAIT	2016-12-27 09:38:00	1.568	2016-12-27	22:38:00
1114	KAIT	2016-11-02 00:37:00	2.494	2016-11-02	13:37:00				1114	KAIT	2016-12-27 09:39:00	1.565	2016-12-27	22:39:00
1115	KAIT	2016-11-02 00:38:00	2.474	2016-11-02	13:38:00				1115	KAIT	2016-12-27 09:40:00	1.559	2016-12-27	22:40:00
1116	KAIT	2016-11-02 00:39:00	2.451	2016-11-02	13:39:00				1116	KAIT	2016-12-27 09:41:00	1.556	2016-12-27	22:41:00
1117	KAIT	2016-11-02 00:40:00	2.466	2016-11-02	13:40:00				1117	KAIT	2016-12-27 09:42:00	1.545	2016-12-27	22:42:00
1118	KAIT	2016-11-02 00:41:00	2.477	2016-11-02	13:41:00				1118	KAIT	2016-12-27 09:43:00	1.534	2016-12-27	22:43:00
1119	KAIT	2016-11-02 00:42:00	2.464	2016-11-02	13:42:00	LT 0.5			1119	KAIT	2016-12-27 09:44:00	1.526	2016-12-27	22:44:00
1120	KAIT	2016-11-02 00:43:00	2.462	2016-11-02	13:43:00				1120	KAIT	2016-12-27 09:45:00	1.54	2016-12-27	22:45:00
1121	KAIT	2016-11-02 00:44:00	2.469	2016-11-02	13:44:00				1121	KAIT	2016-12-27 09:46:00	1.547	2016-12-27	22:46:00
1122	KAIT	2016-11-02 00:45:00	2.44	2016-11-02	13:45:00				1122	KAIT	2016-12-27 09:47:00	1.543	2016-12-27	22:47:00
1123	KAIT	2016-11-02 00:46:00	2.468	2016-11-02	13:46:00				1123	KAIT	2016-12-27 09:48:00	1.538	2016-12-27	22:48:00
1124	KAIT	2016-11-02 00:47:00	2.458	2016-11-02	13:47:00				1124	KAIT	2016-12-27 09:49:00	1.534	2016-12-27	22:49:00
1125	KAIT	2016-11-02 00:48:00	2.469	2016-11-02	13:48:00				1125	KAIT	2016-12-27 09:50:00	1.523	2016-12-27	22:50:00
1126	KAIT	2016-11-02 00:49:00	2.476	2016-11-02	13:49:00				1126	KAIT	2016-12-27 09:51:00	1.527	2016-12-27	22:51:00
1127	KAIT	2016-11-02 00:50:00	2.479	2016-11-02	13:50:00				1127	KAIT	2016-12-27 09:52:00	1.527	2016-12-27	22:52:00
1128	KAIT	2016-11-02 00:51:00	2.453	2016-11-02	13:51:00				1128	KAIT	2016-12-27 09:53:00	1.542	2016-12-27	22:53:00
1129	KAIT	2016-11-02 00:52:00	2.464	2016-11-02	13:52:00				1129	KAIT	2016-12-27 09:54:00	1.543	2016-12-27	22:54:00
1130	KAIT	2016-11-02 00:53:00	2.465	2016-11-02	13:53:00				1130	KAIT	2016-12-27 09:55:00	1.532	2016-12-27	22:55:00
1131	KAIT	2016-11-02 00:54:00	2.458	2016-11-02	13:54:00				1131	KAIT	2016-12-27 09:56:00	1.534	2016-12-27	22:56:00
1132	KAIT	2016-11-02 00:55:00	2.48	2016-11-02	13:55:00				1132	KAIT	2016-12-27 09:57:00	1.53	2016-12-27	22:57:00
1133	KAIT	2016-11-02 00:56:00	2.465	2016-11-02	13:56:00				1133	KAIT	2016-12-27 09:58:00	1.536	2016-12-27	22:58:00
1134	KAIT	2016-11-02 00:57:00	2.471	2016-11-02	13:57:00				1134	KAIT	2016-12-27 09:59:00	1.54	2016-12-27	22:59:00
1135	KAIT	2016-11-02 00:58:00	2.477	2016-11-02	13:58:00				1135	KAIT	2016-12-27 10:00:00	1.551	2016-12-27	23:00:00
1136	KAIT	2016-11-02 00:59:00	2.464	2016-11-02	13:59:00				1136	KAIT	2016-12-27 10:01:00	1.562	2016-12-27	23:01:00
1137	KAIT	2016-11-02 01:00:00	2.48	2016-11-02	14:00:00				1137	KAIT	2016-12-27 10:02:00	1.571	2016-12-27	23:02:00
1138	KAIT	2016-11-02 01:01:00	2.46	2016-11-02	14:01:00				1138	KAIT	2016-12-27 10:03:00	1.575	2016-12-27	23:03:00
1139	KAIT	2016-11-02 01:02:00	2.472	2016-11-02	14:02:00				1139	KAIT	2016-12-27 10:04:00	1.561	2016-12-27	23:04:00
1140	KAIT	2016-11-02 01:03:00	2.481	2016-11-02	14:03:00				1140	KAIT	2016-12-27 10:05:00	1.561	2016-12-27	23:05:00
1141	KAIT	2016-11-02 01:04:00	2.476	2016-11-02	14:04:00				1141	KAIT	2016-12-27 10:06:00	1.555	2016-12-27	23:06:00
1142	KAIT	2016-11-02 01:05:00	2.459	2016-11-02	14:05:00				1142	KAIT	2016-12-27 10:07:00	1.566	2016-12-27	23:07:00
1143	KAIT	2016-11-02 01:06:00	2.473	2016-11-02	14:06:00				1143	KAIT	2016-12-27 10:08:00	1.561	2016-12-27	23:08:00
1144	KAIT	2016-11-02 01:07:00	2.477	2016-11-02	14:07:00				1144	KAIT	2016-12-27 10:09:00	1.56	2016-12-27	23:09:00
1145	KAIT	2016-11-02 01:08:00	2.49	2016-11-02	14:08:00				1145	KAIT	2016-12-27 10:10:00	1.574	2016-12-27	23:10:00
1146	KAIT	2016-11-02 01:09:00	2.472	2016-11-02	14:09:00				1146	KAIT	2016-12-27 10:11:00	1.592	2016-12-27	23:11:00
1147	KAIT	2016-11-02 01:10:00	2.484	2016-11-02	14:10:00				1147	KAIT	2016-12-27 10:12:00	1.599	2016-12-27	23:12:00
1148	KAIT	2016-11-02 01:11:00	2.494	2016-11-02	14:11:00				1148	KAIT	2016-12-27 10:13:00	1.597	2016-12-27	23:13:00
1149	KAIT	2016-11-02 01:12:00	2.481	2016-11-02	14:12:00				1149	KAIT	2016-12-27 10:14:00	1.585	2016-12-27	23:14:00
1150	KAIT	2016-11-02 01:13:00	2.492	2016-11-02	14:13:00				1150	KAIT	2016-12-27 10:15:00	1.588	2016-12-27	23:15:00
1151	KAIT	2016-11-02 01:14:00	2.491	2016-11-02	14:14:00				1151	KAIT	2016-12-27 10:16:00	1.581	2016-12-27	23:16:00
1152	KAIT	2016-11-02 01:15:00	2.485	2016-11-02	14:15:00				1152	KAIT	2016-12-27 10:17:00	1.576	2016-12-27	23:17:00
1153	KAIT	2016-11-02 01:16:00	2.483	2016-11-02	14:16:00				1153	KAIT	2016-12-27 10:18:00	1.559	2016-12-27	23:18:00
1154	KAIT	2016-11-02 01:17:00	2.514	2016-11-02	14:17:00				1154	KAIT	2016-12-27 10:19:00	1.554	2016-12-27	23:19:00
1155	KAIT	2016-11-02 01:18:00	2.491	2016-11-02	14:18:00				1155	KAIT	2016-12-27 10:20:00	1.547	2016-12-27	23:20:00
1156	KAIT	2016-11-02 01:19:00	2.51	2016-11-02	14:19:00				1156	KAIT	2016-12-27 10:21:00	1.563	2016-12-27	23:21:00
1157	KAIT	2016-11-02 01:20:00	2.47	2016-11-02	14:20:00				1157	KAIT	2016-12-27 10:22:00	1.584	2016-12-27	23:22:00
1158	KAIT	2016-11-02 01:21:00	2.506	2016-11-02	14:21:00				1158	KAIT	2016-12-27 10:23:00	1.591	2016-12-27	23:23:00
1159	KAIT	2016-11-02 01:22:00	2.498	2016-11-02	14:22:00				1159	KAIT	2016-12-27 10:24:00	1.605	2016-12-27	23:24:00
1160	KAIT	2016-11-02 01:23:00	2.498	2016-11-02	14:23:00				1160	KAIT	2016-12-27 10:25:00	1.615	2016-12-27	23:25:00
1161	KAIT	2016-11-02 01:24:00	2.493	2016-11-02	14:24:00				1161	KAIT	2016-12-27 10:26:00	1.618	2016-12-27	23:26:00
1162	KAIT	2016-11-02 01:25:00	2.491	2016-11-02	14:25:00				1162	KAIT	2016-12-27 10:27:00	1.597	2016-12-27	23:27:00
1163	KAIT	2016-11-02 01:26:00	2.506	2016-11-02	14:26:00				1163	KAIT	2016-12-27 10:28:00	1.589	2016-12-27	23:28:00
1164	KAIT	2016-11-02 01:27:00	2.497	2016-11-02	14:27:00				1164	KAIT	2016-12-27 10:29:00	1.58	2016-12-27	23:29:00
1165	KAIT	2016-11-02 01:28:00	2.504	2016-11-02	14:28:00				1165	KAIT	2016-12-27 10:30:00	1.594	2016-12-27	23:30:00
1166	KAIT	2016-11-02 01:29:00	2.524	2016-11-02	14:29:00				1166	KAIT	2016-12-27 10:31:00	1.581	2016-12-27	23:31:00
1167	KAIT	2016-11-02 01:30:00	2.5	2016-11-02	14:30:00				1167	KAIT	2016-12-27 10:32:00	1.588	2016-12-27	23:32:00
1168	KAIT	2016-11-02 01:31:00	2.518	2016-11-02	14:31:00				1168	KAIT	2016-12-27 10:33:00	1.6	2016-12-27	23:33:00
1169	KAIT	2016-11-02 01:32:00	2.531	2016-11-02	14:32:00				1169	KAIT	2016-12-27 10:34:00	1.624	2016-12-27	23:34:00
1170	KAIT	2016-11-02 01:33:00	2.519	2016-11-02	14:33:00				1170	KAIT	2016-12-27 10:35:00	1.605	2016-12-27	23:35:00
1171	KAIT	2016-11-02 01:34:00	2.523	2016-11-02	14:34:00				1171	KAIT	2016-12-27 10:36:00	1.591	2016-12-27	23:36:00
1172	KAIT	2016-11-02 01:35:00	2.525	2016-11-02	14:35:00				1172	KAIT	2016-12-27 10:37:00	1.586	2016-12-27	23:37:00
1173	KAIT	2016-11-02 01:36:00	2.524	2016-11-02	14:36:00				1173	KAIT	2016-12-27 10:38:00	1.582	2016-12-27	23:38:00
1174	KAIT	2016-11-02 01:37:00	2.553	2016-11-02	14:37:00				1174	KAIT	2016-12-27 10:39:00	1.588	2016-12-27	23:39:00
1175	KAIT	2016-11-02 01:38:00	2.553	2016-11-02	14:38:00				1175	KAIT	2016-12-27 10:40:00	1.597	2016-12-27	23:40:00
1176	KAIT	2016-11-02 01:39:00	2.541	2016-11-02	14:39:00				1176	KAIT	2016-12-27 10:41:00	1.621	2016-12-27	23:41:00
1177	KAIT	2016-11-02 01:40:00	2.561	2016-11-02	14:40:00				1177	KAIT	2016-12-27 10:42:00	1.635	2016-12-27	23:42:00
1178	KAIT	2016-11-02 01:41:00	2.548	2016-11-02	14:41:00				1178	KAIT	2016-12-27 10:43:00	1.664	2016-12-27	23:43:00
1179	KAIT	2016-11-02 01:42:00	2.561	2016-11-02	14:42:00				1179	KAIT	2016-12-27 10:44:00	1.681	2016-12-27	23:44:00
1180	KAIT	2016-11-02 01:43:00	2.542	2016-11-02	14:43:00				1180	KAIT	2016-12-27 10:45:00	1.692	2016-12-27	23:45:00
1181	KAIT	2016-11-02 01:44:00	2.577	2016-11-02	14:44:00				1181	KAIT	2016-12-27 10:46:00	1.694	2016-12-27	23:46:00
1182	KAIT	2016-11-02 01:45:00	2.552	2016-11-02	14:45:00				1182	KAIT	2016-12-27 10:47:00	1.69	2016-12-27	23:47:00
1183	KAIT	2016-11-02 01:46:00	2.571	2016-11-02	14:46:00				1183	KAIT	2016-12-27 10:48:00	1.692	2016-12-27	23:48:00
1184	KAIT	2016-11-02 01:47:00	2.558	2016-11-02	14:47:00				1184	KAIT	2016-12-27 10:49:00	1.683	2016-12-27	23:49:00
1185	KAIT	2016-11-02 01:48:00	2.572	2016-11-02	14:48:00				1185	KAIT	2016-12-27 10:50:00	1.667	2016-12-27	23:50:00
1186	KAIT	2016-11-02 01:49:00	2.561	2016-11-02	14:49:00				1186	KAIT	2016-12-27 10:51:00	1.66	2016-12-27	23:51:00
1187	KAIT	2016-11-02 01:50:00	2.578	2016-11-02	14:50:00				1187	KAIT	2016-12-27 10:52:00	1.657	2016-12-27	23:52:00
1188	KAIT	2016-11-02 01:51:00	2.572	2016-11-02	14:51:00				1188	KAIT	2016-12-27 10:53:00	1.646	2016-12-27	23:53:00
1189	KAIT	2016-11-02 01:52:00	2.578	2016-11-02	14:52:00				1189	KAIT	2016-12-27 10:54:00	1.654	2016-12-27	23:54:00
1190	KAIT	2016-11-02 01:53:00	2.569	2016-11-02	14:53:00				1190	KAIT	2016-12-27 10:55:00	1.653	2016-12-27	23:55:00
1191	KAIT	2016-11-02 01:54:00	2.581	2016-11-02	14:54:00				1191	KAIT	2016-12-27 10:56:00	1.661	2016-12-27	23:56:00
1192	KAIT	2016-11-02 01:55:00	2.614	2016-11-02	14:55:00				1192	KAIT	2016-12-27 10:57:00	1.665	2016-12-27	23:57:00
1193	KAIT	2016-11-02 01:56:00	2.563	2016-11-02	14:56:00				1193	KAIT	2016-12-27 10:58:00	1.678	2016-12-27	23:58:00
1194	KAIT	2016-11-02 01:57:00	2.594	2016-11-02	14:57:00				1194	KAIT	2016-12-27 10:59:00	1.682	2016-12-27	23:59:00
1195	KAIT	2016-11-02 01:58:00	2.586	2016-11-02	14:58:00				1195	KAIT	2016-12-27 11:00:00	1.678	2016-12-28	1900-01-01
1196	KAIT	2016-11-02 01:59:00	2.588	2016-11-02	14:59:00				1196	KAIT	2016-12-27 11:01:00	1.678	2016-12-28	00:01:00
1197	KAIT	2016-11-02 02:00:00	2.603	2016-11-02	15:00:00				1197	KAIT	2016-12-27 11:02:00	1.684	2016-12-28	00:02:00
1198	KAIT	2016-11-02 02:01:00	2.609	2016-11-02	15:01:00				1198	KAIT	2016-12-27 11:03:00	1.692	2016-12-28	00:03:00
1199	KAIT	2016-11-02 02:02:00	2.601	2016-11-02	15:02:00				1199	KAIT	2016-12-27 11:04:00	1.69	2016-12-28	00:04:00
1200	KAIT	2016-11-02 02:03:00	2.613	2016-11-02	15:03:00				1200	KAIT	2016-12-27 11:05:00	1.686	2016-12-28	00:05:00
1201	KAIT	2016-11-02 02:04:00	2.615	2016-11-02	15:04:00				1201	KAIT	2016-12-27 11:06:00	1.677	2016-12-28	00:06:00
1202	KAIT	2016-11-02 02:05:00	2.593	2016-11-02	15:05:00				1202	KAIT	2016-12-27 11:07:00	1.673	2016-12-28	00:07:00
1203	KAIT	2016-11-02 02:06:00	2.606	2016-11-02	15:06:00				1203	KAIT	2016-12-27 11:08:00	1.69	2016-12-28	00:08:00
1204	KAIT	2016-11-02 02:07:00	2.638	2016-11-02	15:07:00				1204	KAIT	2016-12-27 11:09:00	1.703	2016-12-28	00:09:00
1205	KAIT	2016-11-02 02:08:00	2.626	2016-11-02	15:08:00				1205	KAIT	2016-12-27 11:10:00	1.701	2016-12-28	00:10:00
1206	KAIT	2016-11-02 02:09:00	2.633	2016-11-02	15:09:00				1206	KAIT	2016-12-27 11:11:00	1.709	2016-12-28	00:11:00
1207	KAIT	2016-11-02 02:10:00	2.634	2016-11-02	15:10:00				1207	KAIT	2016-12-27 11:12:00	1.727	2016-12-28	00:12:00
1208	KAIT	2016-11-02 02:11:00	2.632	2016-11-02	15:11:00				1208	KAIT	2016-12-27 11:13:00	1.742	2016-12-28	00:13:00
1209	KAIT	2016-11-02 02:12:00	2.648	2016-11-02	15:12:00				1209	KAIT	2016-12-27 11:14:00	1.745	2016-12-28	00:14:00
1210	KAIT	2016-11-02 02:13:00	2.648	2016-11-02	15:13:00				1210	KAIT	2016-12-27 11:15:00	1.744	2016-12-28	00:15:00
1211	KAIT	2016-11-02 02:14:00	2.644	2016-11-02	15:14:00				1211	KAIT	2016-12-27 11:16:00	1.742	2016-12-28	00:16:00
1212	KAIT	2016-11-02 02:15:00	2.637	2016-11-02	15:15:00				1212	KAIT	2016-12-27 11:17:00	1.736	2016-12-28	00:17:00
1213	KAIT	2016-11-02 02:16:00	2.661	2016-11-02	15:16:00				1213	KAIT	2016-12-27 11:18:00	1.747	2016-12-28	00:18:00
1214	KAIT	2016-11-02 02:17:00	2.663	2016-11-02	15:17:00				1214	KAIT	2016-12-27 11:19:00	1.757	2016-12-28	00:19:00
1215	KAIT	2016-11-02 02:18:00	2.663	2016-11-02	15:18:00				1215	KAIT	2016-12-27 11:20:00	1.755	2016-12-28	00:20:00
1216	KAIT	2016-11-02 02:19:00	2.679	2016-11-02	15:19:00				1216	KAIT	2016-12-27 11:21:00	1.753	2016-12-28	00:21:00
1217	KAIT	2016-11-02 02:20:00	2.665	2016-11-02	15:20:00				1217	KAIT	2016-12-27 11:22:00	1.759	2016-12-28	00:22:00
1218	KAIT	2016-11-02 02:21:00	2.67	2016-11-02	15:21:00				1218	KAIT	2016-12-27 11:23:00	1.777	2016-12-28	00:23:00
1219	KAIT	2016-11-02 02:22:00	2.689	2016-11-02	15:22:00				1219	KAIT	2016-12-27 11:24:00	1.772	2016-12-28	00:24:00
1220	KAIT	2016-11-02 02:23:00	2.682	2016-11-02	15:23:00				1220	KAIT	2016-12-27 11:25:00	1.77	2016-12-28	00:25:00
1221	KAIT	2016-11-02 02:24:00	2.684	2016-11-02	15:24:00				1221	KAIT	2016-12-27 11:26:00	1.755	2016-12-28	00:26:00
1222	KAIT	2016-11-02 02:25:00	2.676	2016-11-02	15:25:00				1222	KAIT	2016-12-27 11:27:00	1.755	2016-12-28	00:27:00
1223	KAIT	2016-11-02 02:26:00	2.689	2016-11-02	15:26:00				1223	KAIT	2016-12-27 11:28:00	1.752	2016-12-28	00:28:00
1224	KAIT	2016-11-02 02:27:00	2.685	2016-11-02	15:27:00				1224	KAIT	2016-12-27 11:29:00	1.759	2016-12-28	00:29:00
1225	KAIT	2016-11-02 02:28:00	2.699	2016-11-02	15:28:00				1225	KAIT	2016-12-27 11:30:00	1.753	2016-12-28	00:30:00
1226	KAIT	2016-11-02 02:29:00	2.665	2016-11-02	15:29:00				1226	KAIT	2016-12-27 11:31:00	1.768	2016-12-28	00:31:00
1227	KAIT	2016-11-02 02:30:00	2.716	2016-11-02	15:30:00				1227	KAIT	2016-12-27 11:32:00	1.782	2016-12-28	00:32:00
1228	KAIT	2016-11-02 02:31:00	2.711	2016-11-02	15:31:00				1228	KAIT	2016-12-27 11:33:00	1.785	2016-12-28	00:33:00
1229	KAIT	2016-11-02 02:32:00	2.717	2016-11-02	15:32:00				1229	KAIT	2016-12-27 11:34:00	1.783	2016-12-28	00:34:00
1230	KAIT	2016-11-02 02:33:00	2.711	2016-11-02	15:33:00				1230	KAIT	2016-12-27 11:35:00	1.782	2016-12-28	00:35:00
1231	KAIT	2016-11-02 02:34:00	2.723	2016-11-02	15:34:00				1231	KAIT	2016-12-27 11:36:00	1.801	2016-12-28	00:36:00
1232	KAIT	2016-11-02 02:35:00	2.737	2016-11-02	15:35:00				1232	KAIT	2016-12-27 11:37:00	1.811	2016-12-28	00:37:00
1233	KAIT	2016-11-02 02:36:00	2.736	2016-11-02	15:36:00				1233	KAIT	2016-12-27 11:38:00	1.81	2016-12-28	00:38:00
1234	KAIT	2016-11-02 02:37:00	2.74	2016-11-02	15:37:00				1234	KAIT	2016-12-27 11:39:00	1.82	2016-12-28	00:39:00
1235	KAIT	2016-11-02 02:38:00	2.739	2016-11-02	15:38:00				1235	KAIT	2016-12-27 11:40:00	1.823	2016-12-28	00:40:00
1236	KAIT	2016-11-02 02:39:00	2.754	2016-11-02	15:39:00				1236	KAIT	2016-12-27 11:41:00	1.822	2016-12-28	00:41:00
1237	KAIT	2016-11-02 02:40:00	2.734	2016-11-02	15:40:00				1237	KAIT	2016-12-27 11:42:00	1.827	2016-12-28	00:42:00
1238	KAIT	2016-11-02 02:41:00	2.752	2016-11-02	15:41:00				1238	KAIT	2016-12-27 11:43:00	1.822	2016-12-28	00:43:00
1239	KAIT	2016-11-02 02:42:00	2.756	2016-11-02	15:42:00				1239	KAIT	2016-12-27 11:44:00	1.814	2016-12-28	00:44:00
1240	KAIT	2016-11-02 02:43:00	2.773	2016-11-02	15:43:00				1240	KAIT	2016-12-27 11:45:00	1.825	2016-12-28	00:45:00
1241	KAIT	2016-11-02 02:44:00	2.761	2016-11-02	15:44:00				1241	KAIT	2016-12-27 11:46:00	1.843	2016-12-28	00:46:00
1242	KAIT	2016-11-02 02:45:00	2.769	2016-11-02	15:45:00				1242	KAIT	2016-12-27 11:47:00	1.838	2016-12-28	00:47:00
1243	KAIT	2016-11-02 02:46:00	2.756	2016-11-02	15:46:00				1243	KAIT	2016-12-27 11:48:00	1.83	2016-12-28	00:48:00
1244	KAIT	2016-11-02 02:47:00	2.785	2016-11-02	15:47:00				1244	KAIT	2016-12-27 11:49:00	1.818	2016-12-28	00:49:00
1245	KAIT	2016-11-02 02:48:00	2.767	2016-11-02	15:48:00				1245	KAIT	2016-12-27 11:50:00	1.82	2016-12-28	00:50:00
1246	KAIT	2016-11-02 02:49:00	2.78	2016-11-02	15:49:00				1246	KAIT	2016-12-27 11:51:00	1.829	2016-12-28	00:51:00
1247	KAIT	2016-11-02 02:50:00	2.772	2016-11-02	15:50:00				1247	KAIT	2016-12-27 11:52:00	1.822	2016-12-28	00:52:00
1248	KAIT	2016-11-02 02:51:00	2.778	2016-11-02	15:51:00				1248	KAIT	2016-12-27 11:53:00	1.823	2016-12-28	00:53:00
1249	KAIT	2016-11-02 02:52:00	2.788	2016-11-02	15:52:00				1249	KAIT	2016-12-27 11:54:00	1.831	2016-12-28	00:54:00
1250	KAIT	2016-11-02 02:53:00	2.811	2016-11-02	15:53:00				1250	KAIT	2016-12-27 11:55:00	1.839	2016-12-28	00:55:00
1251	KAIT	2016-11-02 02:54:00	2.793	2016-11-02	15:54:00				1251	KAIT	2016-12-27 11:56:00	1.848	2016-12-28	00:56:00
1252	KAIT	2016-11-02 02:55:00	2.802	2016-11-02	15:55:00				1252	KAIT	2016-12-27 11:57:00	1.864	2016-12-28	00:57:00
1253	KAIT	2016-11-02 02:56:00	2.801	2016-11-02	15:56:00				1253	KAIT	2016-12-27 11:58:00	1.876	2016-12-28	00:58:00
1254	KAIT	2016-11-02 02:57:00	2.81	2016-11-02	15:57:00				1254	KAIT	2016-12-27 11:59:00	1.89	2016-12-28	00:59:00
1255	KAIT	2016-11-02 02:58:00	2.822	2016-11-02	15:58:00				1255	KAIT	2016-12-27 12:00:00	1.893	2016-12-28	01:00:00
1256	KAIT	2016-11-02 02:59:00	2.83	2016-11-02	15:59:00				1256	KAIT	2016-12-27 12:01:00	1.912	2016-12-28	01:01:00
1257	KAIT	2016-11-02 03:00:00	2.83	2016-11-02	16:00:00				1257	KAIT	2016-12-27 12:02:00	1.915	2016-12-28	01:02:00
1258	KAIT	2016-11-02 03:01:00	2.822	2016-11-02	16:01:00				1258	KAIT	2016-12-27 12:03:00	1.917	2016-12-28	01:03:00
1259	KAIT	2016-11-02 03:02:00	2.85	2016-11-02	16:02:00				1259	KAIT	2016-12-27 12:04:00	1.904	2016-12-28	01:04:00
1260	KAIT	2016-11-02 03:03:00	2.844	2016-11-02	16:03:00				1260	KAIT	2016-12-27 12:05:00	1.905	2016-12-28	01:05:00
1261	KAIT	2016-11-02 03:04:00	2.841	2016-11-02	16:04:00				1261	KAIT	2016-12-27 12:06:00	1.92	2016-12-28	01:06:00
1262	KAIT	2016-11-02 03:05:00	2.851	2016-11-02	16:05:00				1262	KAIT	2016-12-27 12:07:00	1.919	2016-12-28	01:07:00
1263	KAIT	2016-11-02 03:06:00	2.844	2016-11-02	16:06:00				1263	KAIT	2016-12-27 12:08:00	1.927	2016-12-28	01:08:00
1264	KAIT	2016-11-02 03:07:00	2.86	2016-11-02	16:07:00				1264	KAIT	2016-12-27 12:09:00	1.921	2016-12-28	01:09:00
1265	KAIT	2016-11-02 03:08:00	2.868	2016-11-02	16:08:00				1265	KAIT	2016-12-27 12:10:00	1.922	2016-12-28	01:10:00
1266	KAIT	2016-11-02 03:09:00	2.881	2016-11-02	16:09:00				1266	KAIT	2016-12-27 12:11:00	1.934	2016-12-28	01:11:00
1267	KAIT	2016-11-02 03:10:00	2.886	2016-11-02	16:10:00				1267	KAIT	2016-12-27 12:12:00	1.931	2016-12-28	01:12:00
1268	KAIT	2016-11-02 03:11:00	2.878	2016-11-02	16:11:00				1268	KAIT	2016-12-27 12:13:00	1.934	2016-12-28	01:13:00
1269	KAIT	2016-11-02 03:12:00	2.877	2016-11-02	16:12:00				1269	KAIT	2016-12-27 12:14:00	1.935	2016-12-28	01:14:00
1270	KAIT	2016-11-02 03:13:00	2.886	2016-11-02	16:13:00				1270	KAIT	2016-12-27 12:15:00	1.941	2016-12-28	01:15:00
1271	KAIT	2016-11-02 03:14:00	2.884	2016-11-02	16:14:00				1271	KAIT	2016-12-27 12:16:00	1.955	2016-12-28	01:16:00
1272	KAIT	2016-11-02 03:15:00	2.876	2016-11-02	16:15:00				1272	KAIT	2016-12-27 12:17:00	1.963	2016-12-28	01:17:00
1273	KAIT	2016-11-02 03:16:00	2.882	2016-11-02	16:16:00				1273	KAIT	2016-12-27 12:18:00	1.96	2016-12-28	01:18:00
1274	KAIT	2016-11-02 03:17:00	2.882	2016-11-02	16:17:00				1274	KAIT	2016-12-27 12:19:00	1.958	2016-12-28	01:19:00
1275	KAIT	2016-11-02 03:18:00	2.897	2016-11-02	16:18:00				1275	KAIT	2016-12-27 12:20:00	1.95	2016-12-28	01:20:00
1276	KAIT	2016-11-02 03:19:00	2.904	2016-11-02	16:19:00				1276	KAIT	2016-12-27 12:21:00	1.951	2016-12-28	01:21:00
1277	KAIT	2016-11-02 03:20:00	2.915	2016-11-02	16:20:00				1277	KAIT	2016-12-27 12:22:00	1.948	2016-12-28	01:22:00
1278	KAIT	2016-11-02 03:21:00	2.907	2016-11-02	16:21:00				1278	KAIT	2016-12-27 12:23:00	1.941	2016-12-28	01:23:00
1279	KAIT	2016-11-02 03:22:00	2.91	2016-11-02	16:22:00				1279	KAIT	2016-12-27 12:24:00	1.947	2016-12-28	01:24:00
1280	KAIT	2016-11-02 03:23:00	2.916	2016-11-02	16:23:00				1280	KAIT	2016-12-27 12:25:00	1.957	2016-12-28	01:25:00
1281	KAIT	2016-11-02 03:24:00	2.927	2016-11-02	16:24:00				1281	KAIT	2016-12-27 12:26:00	1.969	2016-12-28	01:26:00
1282	KAIT	2016-11-02 03:25:00	2.939	2016-11-02	16:25:00				1282	KAIT	2016-12-27 12:27:00	1.972	2016-12-28	01:27:00
1283	KAIT	2016-11-02 03:26:00	2.938	2016-11-02	16:26:00				1283	KAIT	2016-12-27 12:28:00	1.988	2016-12-28	01:28:00
1284	KAIT	2016-11-02 03:27:00	2.954	2016-11-02	16:27:00				1284	KAIT	2016-12-27 12:29:00	2.003	2016-12-28	01:29:00
1285	KAIT	2016-11-02 03:28:00	2.965	2016-11-02	16:28:00				1285	KAIT	2016-12-27 12:30:00	2.007	2016-12-28	01:30:00
1286	KAIT	2016-11-02 03:29:00	2.948	2016-11-02	16:29:00				1286	KAIT	2016-12-27 12:31:00	2.011	2016-12-28	01:31:00
1287	KAIT	2016-11-02 03:30:00	2.948	2016-11-02	16:30:00				1287	KAIT	2016-12-27 12:32:00	2.014	2016-12-28	01:32:00
1288	KAIT	2016-11-02 03:31:00	2.964	2016-11-02	16:31:00				1288	KAIT	2016-12-27 12:33:00	2.035	2016-12-28	01:33:00
1289	KAIT	2016-11-02 03:32:00	2.976	2016-11-02	16:32:00				1289	KAIT	2016-12-27 12:34:00	2.03	2016-12-28	01:34:00
1290	KAIT	2016-11-02 03:33:00	2.961	2016-11-02	16:33:00				1290	KAIT	2016-12-27 12:35:00	2.037	2016-12-28	01:35:00
1291	KAIT	2016-11-02 03:34:00	2.969	2016-11-02	16:34:00				1291	KAIT	2016-12-27 12:36:00	2.04	2016-12-28	01:36:00
1292	KAIT	2016-11-02 03:35:00	2.988	2016-11-02	16:35:00				1292	KAIT	2016-12-27 12:37:00	2.057	2016-12-28	01:37:00
1293	KAIT	2016-11-02 03:36:00	2.98	2016-11-02	16:36:00				1293	KAIT	2016-12-27 12:38:00	2.044	2016-12-28	01:38:00
1294	KAIT	2016-11-02 03:37:00	2.973	2016-11-02	16:37:00				1294	KAIT	2016-12-27 12:39:00	2.041	2016-12-28	01:39:00
1295	KAIT	2016-11-02 03:38:00	2.968	2016-11-02	16:38:00				1295	KAIT	2016-12-27 12:40:00	2.035	2016-12-28	01:40:00
1296	KAIT	2016-11-02 03:39:00	2.998	2016-11-02	16:39:00				1296	KAIT	2016-12-27 12:41:00	2.042	2016-12-28	01:41:00
1297	KAIT	2016-11-02 03:40:00	3.002	2016-11-02	16:40:00				1297	KAIT	2016-12-27 12:42:00	2.056	2016-12-28	01:42:00
1298	KAIT	2016-11-02 03:41:00	2.986	2016-11-02	16:41:00				1298	KAIT	2016-12-27 12:43:00	2.056	2016-12-28	01:43:00
1299	KAIT	2016-11-02 03:42:00	3.004	2016-11-02	16:42:00				1299	KAIT	2016-12-27 12:44:00	2.073	2016-12-28	01:44:00
1300	KAIT	2016-11-02 03:43:00	3.006	2016-11-02	16:43:00				1300	KAIT	2016-12-27 12:45:00	2.078	2016-12-28	01:45:00
1301	KAIT	2016-11-02 03:44:00	3.021	2016-11-02	16:44:00				1301	KAIT	2016-12-27 12:46:00	2.107	2016-12-28	01:46:00
1302	KAIT	2016-11-02 03:45:00	3.037	2016-11-02	16:45:00				1302	KAIT	2016-12-27 12:47:00	2.111	2016-12-28	01:47:00
1303	KAIT	2016-11-02 03:46:00	3.047	2016-11-02	16:46:00				1303	KAIT	2016-12-27 12:48:00	2.115	2016-12-28	01:48:00
1304	KAIT	2016-11-02 03:47:00	3.033	2016-11-02	16:47:00				1304	KAIT	2016-12-27 12:49:00	2.123	2016-12-28	01:49:00
1305	KAIT	2016-11-02 03:48:00	3.042	2016-11-02	16:48:00				1305	KAIT	2016-12-27 12:50:00	2.133	2016-12-28	01:50:00
1306	KAIT	2016-11-02 03:49:00	3.028	2016-11-02	16:49:00				1306	KAIT	2016-12-27 12:51:00	2.137	2016-12-28	01:51:00
1307	KAIT	2016-11-02 03:50:00	3.065	2016-11-02	16:50:00				1307	KAIT	2016-12-27 12:52:00	2.14	2016-12-28	01:52:00
1308	KAIT	2016-11-02 03:51:00	3.054	2016-11-02	16:51:00				1308	KAIT	2016-12-27 12:53:00	2.143	2016-12-28	01:53:00
1309	KAIT	2016-11-02 03:52:00	3.069	2016-11-02	16:52:00				1309	KAIT	2016-12-27 12:54:00	2.153	2016-12-28	01:54:00
1310	KAIT	2016-11-02 03:53:00	3.058	2016-11-02	16:53:00				1310	KAIT	2016-12-27 12:55:00	2.15	2016-12-28	01:55:00
1311	KAIT	2016-11-02 03:54:00	3.055	2016-11-02	16:54:00				1311	KAIT	2016-12-27 12:56:00	2.161	2016-12-28	01:56:00
1312	KAIT	2016-11-02 03:55:00	3.065	2016-11-02	16:55:00				1312	KAIT	2016-12-27 12:57:00	2.147	2016-12-28	01:57:00
1313	KAIT	2016-11-02 03:56:00	3.065	2016-11-02	16:56:00				1313	KAIT	2016-12-27 12:58:00	2.133	2016-12-28	01:58:00
1314	KAIT	2016-11-02 03:57:00	3.074	2016-11-02	16:57:00				1314	KAIT	2016-12-27 12:59:00	2.128	2016-12-28	01:59:00
1315	KAIT	2016-11-02 03:58:00	3.049	2016-11-02	16:58:00				1315	KAIT	2016-12-27 13:00:00	2.126	2016-12-28	02:00:00
1316	KAIT	2016-11-02 03:59:00	3.095	2016-11-02	16:59:00				1316	KAIT	2016-12-27 13:01:00	2.125	2016-12-28	02:01:00
1317	KAIT	2016-11-02 04:00:00	3.07	2016-11-02	17:00:00				1317	KAIT	2016-12-27 13:02:00	2.119	2016-12-28	02:02:00
1318	KAIT	2016-11-02 04:01:00	3.083	2016-11-02	17:01:00				1318	KAIT	2016-12-27 13:03:00	2.138	2016-12-28	02:03:00
1319	KAIT	2016-11-02 04:02:00	3.102	2016-11-02	17:02:00				1319	KAIT	2016-12-27 13:04:00	2.156	2016-12-28	02:04:00
1320	KAIT	2016-11-02 04:03:00	3.102	2016-11-02	17:03:00				1320	KAIT	2016-12-27 13:05:00	2.178	2016-12-28	02:05:00
1321	KAIT	2016-11-02 04:04:00	3.094	2016-11-02	17:04:00				1321	KAIT	2016-12-27 13:06:00	2.191	2016-12-28	02:06:00
1322	KAIT	2016-11-02 04:05:00	3.102	2016-11-02	17:05:00				1322	KAIT	2016-12-27 13:07:00	2.2	2016-12-28	02:07:00
1323	KAIT	2016-11-02 04:06:00	3.096	2016-11-02	17:06:00				1323	KAIT	2016-12-27 13:08:00	2.205	2016-12-28	02:08:00
1324	KAIT	2016-11-02 04:07:00	3.112	2016-11-02	17:07:00				1324	KAIT	2016-12-27 13:09:00	2.217	2016-12-28	02:09:00
1325	KAIT	2016-11-02 04:08:00	3.109	2016-11-02	17:08:00				1325	KAIT	2016-12-27 13:10:00	2.222	2016-12-28	02:10:00
1326	KAIT	2016-11-02 04:09:00	3.135	2016-11-02	17:09:00				1326	KAIT	2016-12-27 13:11:00	2.203	2016-12-28	02:11:00
1327	KAIT	2016-11-02 04:10:00	3.119	2016-11-02	17:10:00				1327	KAIT	2016-12-27 13:12:00	2.2	2016-12-28	02:12:00
1328	KAIT	2016-11-02 04:11:00	3.131	2016-11-02	17:11:00				1328	KAIT	2016-12-27 13:13:00	2.205	2016-12-28	02:13:00
1329	KAIT	2016-11-02 04:12:00	3.134	2016-11-02	17:12:00				1329	KAIT	2016-12-27 13:14:00	2.224	2016-12-28	02:14:00
1330	KAIT	2016-11-02 04:13:00	3.162	2016-11-02	17:13:00				1330	KAIT	2016-12-27 13:15:00	2.233	2016-12-28	02:15:00
1331	KAIT	2016-11-02 04:14:00	3.145	2016-11-02	17:14:00				1331	KAIT	2016-12-27 13:16:00	2.236	2016-12-28	02:16:00
1332	KAIT	2016-11-02 04:15:00	3.168	2016-11-02	17:15:00				1332	KAIT	2016-12-27 13:17:00	2.242	2016-12-28	02:17:00
1333	KAIT	2016-11-02 04:16:00	3.172	2016-11-02	17:16:00				1333	KAIT	2016-12-27 13:18:00	2.255	2016-12-28	02:18:00
1334	KAIT	2016-11-02 04:17:00	3.166	2016-11-02	17:17:00				1334	KAIT	2016-12-27 13:19:00	2.262	2016-12-28	02:19:00
1335	KAIT	2016-11-02 04:18:00	3.161	2016-11-02	17:18:00				1335	KAIT	2016-12-27 13:20:00	2.262	2016-12-28	02:20:00
1336	KAIT	2016-11-02 04:19:00	3.183	2016-11-02	17:19:00				1336	KAIT	2016-12-27 13:21:00	2.26	2016-12-28	02:21:00
1337	KAIT	2016-11-02 04:20:00	3.168	2016-11-02	17:20:00				1337	KAIT	2016-12-27 13:22:00	2.255	2016-12-28	02:22:00
1338	KAIT	2016-11-02 04:21:00	3.183	2016-11-02	17:21:00				1338	KAIT	2016-12-27 13:23:00	2.26	2016-12-28	02:23:00
1339	KAIT	2016-11-02 04:22:00	3.209	2016-11-02	17:22:00				1339	KAIT	2016-12-27 13:24:00	2.271	2016-12-28	02:24:00
1340	KAIT	2016-11-02 04:23:00	3.193	2016-11-02	17:23:00				1340	KAIT	2016-12-27 13:25:00	2.268	2016-12-28	02:25:00
1341	KAIT	2016-11-02 04:24:00	3.188	2016-11-02	17:24:00				1341	KAIT	2016-12-27 13:26:00	2.275	2016-12-28	02:26:00
1342	KAIT	2016-11-02 04:25:00	3.208	2016-11-02	17:25:00				1342	KAIT	2016-12-27 13:27:00	2.281	2016-12-28	02:27:00
1343	KAIT	2016-11-02 04:26:00	3.201	2016-11-02	17:26:00				1343	KAIT	2016-12-27 13:28:00	2.291	2016-12-28	02:28:00
1344	KAIT	2016-11-02 04:27:00	3.203	2016-11-02	17:27:00				1344	KAIT	2016-12-27 13:29:00	2.284	2016-12-28	02:29:00
1345	KAIT	2016-11-02 04:28:00	3.218	2016-11-02	17:28:00				1345	KAIT	2016-12-27 13:30:00	2.283	2016-12-28	02:30:00
1346	KAIT	2016-11-02 04:29:00	3.183	2016-11-02	17:29:00				1346	KAIT	2016-12-27 13:31:00	2.278	2016-12-28	02:31:00
1347	KAIT	2016-11-02 04:30:00	3.209	2016-11-02	17:30:00				1347	KAIT	2016-12-27 13:32:00	2.283	2016-12-28	02:32:00
1348	KAIT	2016-11-02 04:31:00	3.215	2016-11-02	17:31:00				1348	KAIT	2016-12-27 13:33:00	2.283	2016-12-28	02:33:00
1349	KAIT	2016-11-02 04:32:00	3.232	2016-11-02	17:32:00				1349	KAIT	2016-12-27 13:34:00	2.294	2016-12-28	02:34:00
1350	KAIT	2016-11-02 04:33:00	3.23	2016-11-02	17:33:00				1350	KAIT	2016-12-27 13:35:00	2.303	2016-12-28	02:35:00
1351	KAIT	2016-11-02 04:34:00	3.24	2016-11-02	17:34:00				1351	KAIT	2016-12-27 13:36:00	2.311	2016-12-28	02:36:00
1352	KAIT	2016-11-02 04:35:00	3.236	2016-11-02	17:35:00				1352	KAIT	2016-12-27 13:37:00	2.31	2016-12-28	02:37:00
1353	KAIT	2016-11-02 04:36:00	3.244	2016-11-02	17:36:00				1353	KAIT	2016-12-27 13:38:00	2.315	2016-12-28	02:38:00
1354	KAIT	2016-11-02 04:37:00	3.253	2016-11-02	17:37:00				1354	KAIT	2016-12-27 13:39:00	2.336	2016-12-28	02:39:00
1355	KAIT	2016-11-02 04:38:00	3.248	2016-11-02	17:38:00				1355	KAIT	2016-12-27 13:40:00	2.34	2016-12-28	02:40:00
1356	KAIT	2016-11-02 04:39:00	3.243	2016-11-02	17:39:00				1356	KAIT	2016-12-27 13:41:00	2.357	2016-12-28	02:41:00
1357	KAIT	2016-11-02 04:40:00	3.252	2016-11-02	17:40:00				1357	KAIT	2016-12-27 13:42:00	2.359	2016-12-28	02:42:00
1358	KAIT	2016-11-02 04:41:00	3.263	2016-11-02	17:41:00				1358	KAIT	2016-12-27 13:43:00	2.376	2016-12-28	02:43:00
1359	KAIT	2016-11-02 04:42:00	3.266	2016-11-02	17:42:00				1359	KAIT	2016-12-27 13:44:00	2.369	2016-12-28	02:44:00
1360	KAIT	2016-11-02 04:43:00	3.291	2016-11-02	17:43:00				1360	KAIT	2016-12-27 13:45:00	2.374	2016-12-28	02:45:00
1361	KAIT	2016-11-02 04:44:00	3.273	2016-11-02	17:44:00				1361	KAIT	2016-12-27 13:46:00	2.367	2016-12-28	02:46:00
1362	KAIT	2016-11-02 04:45:00	3.285	2016-11-02	17:45:00				1362	KAIT	2016-12-27 13:47:00	2.356	2016-12-28	02:47:00
1363	KAIT	2016-11-02 04:46:00	3.281	2016-11-02	17:46:00				1363	KAIT	2016-12-27 13:48:00	2.341	2016-12-28	02:48:00
1364	KAIT	2016-11-02 04:47:00	3.291	2016-11-02	17:47:00				1364	KAIT	2016-12-27 13:49:00	2.35	2016-12-28	02:49:00
1365	KAIT	2016-11-02 04:48:00	3.281	2016-11-02	17:48:00				1365	KAIT	2016-12-27 13:50:00	2.355	2016-12-28	02:50:00
1366	KAIT	2016-11-02 04:49:00	3.306	2016-11-02	17:49:00				1366	KAIT	2016-12-27 13:51:00	2.361	2016-12-28	02:51:00
1367	KAIT	2016-11-02 04:50:00	3.287	2016-11-02	17:50:00				1367	KAIT	2016-12-27 13:52:00	2.38	2016-12-28	02:52:00
1368	KAIT	2016-11-02 04:51:00	3.304	2016-11-02	17:51:00				1368	KAIT	2016-12-27 13:53:00	2.404	2016-12-28	02:53:00
1369	KAIT	2016-11-02 04:52:00	3.292	2016-11-02	17:52:00				1369	KAIT	2016-12-27 13:54:00	2.415	2016-12-28	02:54:00
1370	KAIT	2016-11-02 04:53:00	3.304	2016-11-02	17:53:00				1370	KAIT	2016-12-27 13:55:00	2.415	2016-12-28	02:55:00
1371	KAIT	2016-11-02 04:54:00	3.326	2016-11-02	17:54:00				1371	KAIT	2016-12-27 13:56:00	2.404	2016-12-28	02:56:00
1372	KAIT	2016-11-02 04:55:00	3.317	2016-11-02	17:55:00				1372	KAIT	2016-12-27 13:57:00	2.404	2016-12-28	02:57:00
1373	KAIT	2016-11-02 04:56:00	3.345	2016-11-02	17:56:00				1373	KAIT	2016-12-27 13:58:00	2.41	2016-12-28	02:58:00
1374	KAIT	2016-11-02 04:57:00	3.322	2016-11-02	17:57:00				1374	KAIT	2016-12-27 13:59:00	2.408	2016-12-28	02:59:00
1375	KAIT	2016-11-02 04:58:00	3.34	2016-11-02	17:58:00				1375	KAIT	2016-12-27 14:00:00	2.395	2016-12-28	03:00:00
1376	KAIT	2016-11-02 04:59:00	3.336	2016-11-02	17:59:00				1376	KAIT	2016-12-27 14:01:00	2.393	2016-12-28	03:01:00
1377	KAIT	2016-11-02 05:00:00	3.343	2016-11-02	18:00:00				1377	KAIT	2016-12-27 14:02:00	2.392	2016-12-28	03:02:00
1378	KAIT	2016-11-02 05:01:00	3.346	2016-11-02	18:01:00				1378	KAIT	2016-12-27 14:03:00	2.41	2016-12-28	03:03:00
1379	KAIT	2016-11-02 05:02:00	3.35	2016-11-02	18:02:00				1379	KAIT	2016-12-27 14:04:00	2.418	2016-12-28	03:04:00
1380	KAIT	2016-11-02 05:03:00	3.357	2016-11-02	18:03:00				1380	KAIT	2016-12-27 14:05:00	2.432	2016-12-28	03:05:00
1381	KAIT	2016-11-02 05:04:00	3.356	2016-11-02	18:04:00				1381	KAIT	2016-12-27 14:06:00	2.444	2016-12-28	03:06:00
1382	KAIT	2016-11-02 05:05:00	3.357	2016-11-02	18:05:00				1382	KAIT	2016-12-27 14:07:00	2.439	2016-12-28	03:07:00
1383	KAIT	2016-11-02 05:06:00	3.352	2016-11-02	18:06:00				1383	KAIT	2016-12-27 14:08:00	2.446	2016-12-28	03:08:00
1384	KAIT	2016-11-02 05:07:00	3.348	2016-11-02	18:07:00				1384	KAIT	2016-12-27 14:09:00	2.445	2016-12-28	03:09:00
1385	KAIT	2016-11-02 05:08:00	3.354	2016-11-02	18:08:00				1385	KAIT	2016-12-27 14:10:00	2.444	2016-12-28	03:10:00
1386	KAIT	2016-11-02 05:09:00	3.361	2016-11-02	18:09:00				1386	KAIT	2016-12-27 14:11:00	2.439	2016-12-28	03:11:00
1387	KAIT	2016-11-02 05:10:00	3.382	2016-11-02	18:10:00				1387	KAIT	2016-12-27 14:12:00	2.443	2016-12-28	03:12:00
1388	KAIT	2016-11-02 05:11:00	3.385	2016-11-02	18:11:00				1388	KAIT	2016-12-27 14:13:00	2.451	2016-12-28	03:13:00
1389	KAIT	2016-11-02 05:12:00	3.374	2016-11-02	18:12:00				1389	KAIT	2016-12-27 14:14:00	2.463	2016-12-28	03:14:00
1390	KAIT	2016-11-02 05:13:00	3.374	2016-11-02	18:13:00				1390	KAIT	2016-12-27 14:15:00	2.47	2016-12-28	03:15:00
1391	KAIT	2016-11-02 05:14:00	3.392	2016-11-02	18:14:00				1391	KAIT	2016-12-27 14:16:00	2.47	2016-12-28	03:16:00
1392	KAIT	2016-11-02 05:15:00	3.388	2016-11-02	18:15:00				1392	KAIT	2016-12-27 14:17:00	2.484	2016-12-28	03:17:00
1393	KAIT	2016-11-02 05:16:00	3.372	2016-11-02	18:16:00				1393	KAIT	2016-12-27 14:18:00	2.489	2016-12-28	03:18:00
1394	KAIT	2016-11-02 05:17:00	3.402	2016-11-02	18:17:00				1394	KAIT	2016-12-27 14:19:00	2.496	2016-12-28	03:19:00
1395	KAIT	2016-11-02 05:18:00	3.397	2016-11-02	18:18:00				1395	KAIT	2016-12-27 14:20:00	2.501	2016-12-28	03:20:00
1396	KAIT	2016-11-02 05:19:00	3.409	2016-11-02	18:19:00				1396	KAIT	2016-12-27 14:21:00	2.511	2016-12-28	03:21:00
1397	KAIT	2016-11-02 05:20:00	3.414	2016-11-02	18:20:00				1397	KAIT	2016-12-27 14:22:00	2.522	2016-12-28	03:22:00
1398	KAIT	2016-11-02 05:21:00	3.425	2016-11-02	18:21:00				1398	KAIT	2016-12-27 14:23:00	2.519	2016-12-28	03:23:00
1399	KAIT	2016-11-02 05:22:00	3.435	2016-11-02	18:22:00				1399	KAIT	2016-12-27 14:24:00	2.516	2016-12-28	03:24:00
1400	KAIT	2016-11-02 05:23:00	3.422	2016-11-02	18:23:00				1400	KAIT	2016-12-27 14:25:00	2.505	2016-12-28	03:25:00
1401	KAIT	2016-11-02 05:24:00	3.422	2016-11-02	18:24:00				1401	KAIT	2016-12-27 14:26:00	2.508	2016-12-28	03:26:00
1402	KAIT	2016-11-02 05:25:00	3.44	2016-11-02	18:25:00				1402	KAIT	2016-12-27 14:27:00	2.51	2016-12-28	03:27:00
1403	KAIT	2016-11-02 05:26:00	3.431	2016-11-02	18:26:00				1403	KAIT	2016-12-27 14:28:00	2.508	2016-12-28	03:28:00
1404	KAIT	2016-11-02 05:27:00	3.444	2016-11-02	18:27:00				1404	KAIT	2016-12-27 14:29:00	2.519	2016-12-28	03:29:00
1405	KAIT	2016-11-02 05:28:00	3.435	2016-11-02	18:28:00				1405	KAIT	2016-12-27 14:30:00	2.532	2016-12-28	03:30:00
1406	KAIT	2016-11-02 05:29:00	3.434	2016-11-02	18:29:00				1406	KAIT	2016-12-27 14:31:00	2.542	2016-12-28	03:31:00
1407	KAIT	2016-11-02 05:30:00	3.439	2016-11-02	18:30:00				1407	KAIT	2016-12-27 14:32:00	2.538	2016-12-28	03:32:00
1408	KAIT	2016-11-02 05:31:00	3.451	2016-11-02	18:31:00				1408	KAIT	2016-12-27 14:33:00	2.54	2016-12-28	03:33:00
1409	KAIT	2016-11-02 05:32:00	3.436	2016-11-02	18:32:00				1409	KAIT	2016-12-27 14:34:00	2.528	2016-12-28	03:34:00
1410	KAIT	2016-11-02 05:33:00	3.44	2016-11-02	18:33:00				1410	KAIT	2016-12-27 14:35:00	2.534	2016-12-28	03:35:00
1411	KAIT	2016-11-02 05:34:00	3.449	2016-11-02	18:34:00				1411	KAIT	2016-12-27 14:36:00	2.53	2016-12-28	03:36:00
1412	KAIT	2016-11-02 05:35:00	3.452	2016-11-02	18:35:00				1412	KAIT	2016-12-27 14:37:00	2.529	2016-12-28	03:37:00
1413	KAIT	2016-11-02 05:36:00	3.468	2016-11-02	18:36:00				1413	KAIT	2016-12-27 14:38:00	2.528	2016-12-28	03:38:00
1414	KAIT	2016-11-02 05:37:00	3.444	2016-11-02	18:37:00				1414	KAIT	2016-12-27 14:39:00	2.526	2016-12-28	03:39:00
1415	KAIT	2016-11-02 05:38:00	3.448	2016-11-02	18:38:00				1415	KAIT	2016-12-27 14:40:00	2.529	2016-12-28	03:40:00
1416	KAIT	2016-11-02 05:39:00	3.439	2016-11-02	18:39:00				1416	KAIT	2016-12-27 14:41:00	2.541	2016-12-28	03:41:00
1417	KAIT	2016-11-02 05:40:00	3.455	2016-11-02	18:40:00				1417	KAIT	2016-12-27 14:42:00	2.551	2016-12-28	03:42:00
1418	KAIT	2016-11-02 05:41:00	3.457	2016-11-02	18:41:00				1418	KAIT	2016-12-27 14:43:00	2.56	2016-12-28	03:43:00
1419	KAIT	2016-11-02 05:42:00	3.452	2016-11-02	18:42:00				1419	KAIT	2016-12-27 14:44:00	2.556	2016-12-28	03:44:00
1420	KAIT	2016-11-02 05:43:00	3.457	2016-11-02	18:43:00				1420	KAIT	2016-12-27 14:45:00	2.577	2016-12-28	03:45:00
1421	KAIT	2016-11-02 05:44:00	3.472	2016-11-02	18:44:00				1421	KAIT	2016-12-27 14:46:00	2.576	2016-12-28	03:46:00
1422	KAIT	2016-11-02 05:45:00	3.473	2016-11-02	18:45:00				1422	KAIT	2016-12-27 14:47:00	2.581	2016-12-28	03:47:00
1423	KAIT	2016-11-02 05:46:00	3.479	2016-11-02	18:46:00				1423	KAIT	2016-12-27 14:48:00	2.582	2016-12-28	03:48:00
1424	KAIT	2016-11-02 05:47:00	3.48	2016-11-02	18:47:00				1424	KAIT	2016-12-27 14:49:00	2.581	2016-12-28	03:49:00
1425	KAIT	2016-11-02 05:48:00	3.477	2016-11-02	18:48:00				1425	KAIT	2016-12-27 14:50:00	2.58	2016-12-28	03:50:00
1426	KAIT	2016-11-02 05:49:00	3.486	2016-11-02	18:49:00				1426	KAIT	2016-12-27 14:51:00	2.585	2016-12-28	03:51:00
1427	KAIT	2016-11-02 05:50:00	3.49	2016-11-02	18:50:00				1427	KAIT	2016-12-27 14:52:00	2.592	2016-12-28	03:52:00
1428	KAIT	2016-11-02 05:51:00	3.492	2016-11-02	18:51:00				1428	KAIT	2016-12-27 14:53:00	2.599	2016-12-28	03:53:00
1429	KAIT	2016-11-02 05:52:00	3.493	2016-11-02	18:52:00				1429	KAIT	2016-12-27 14:54:00	2.612	2016-12-28	03:54:00
1430	KAIT	2016-11-02 05:53:00	3.504	2016-11-02	18:53:00				1430	KAIT	2016-12-27 14:55:00	2.605	2016-12-28	03:55:00
1431	KAIT	2016-11-02 05:54:00	3.493	2016-11-02	18:54:00				1431	KAIT	2016-12-27 14:56:00	2.61	2016-12-28	03:56:00
1432	KAIT	2016-11-02 05:55:00	3.498	2016-11-02	18:55:00				1432	KAIT	2016-12-27 14:57:00	2.604	2016-12-28	03:57:00
1433	KAIT	2016-11-02 05:56:00	3.502	2016-11-02	18:56:00				1433	KAIT	2016-12-27 14:58:00	2.604	2016-12-28	03:58:00
1434	KAIT	2016-11-02 05:57:00	3.49	2016-11-02	18:57:00				1434	KAIT	2016-12-27 14:59:00	2.596	2016-12-28	03:59:00
1435	KAIT	2016-11-02 05:58:00	3.489	2016-11-02	18:58:00				1435	KAIT	2016-12-27 15:00:00	2.587	2016-12-28	04:00:00
1436	KAIT	2016-11-02 05:59:00	3.5	2016-11-02	18:59:00				1436	KAIT	2016-12-27 15:01:00	2.589	2016-12-28	04:01:00
1437	KAIT	2016-11-02 06:00:00	3.495	2016-11-02	19:00:00				1437	KAIT	2016-12-27 15:02:00	2.597	2016-12-28	04:02:00
1438	KAIT	2016-11-02 06:01:00	3.49	2016-11-02	19:01:00				1438	KAIT	2016-12-27 15:03:00	2.611	2016-12-28	04:03:00
1439	KAIT	2016-11-02 06:02:00	3.511	2016-11-02	19:02:00				1439	KAIT	2016-12-27 15:04:00	2.62	2016-12-28	04:04:00
1440	KAIT	2016-11-02 06:03:00	3.507	2016-11-02	19:03:00				1440	KAIT	2016-12-27 15:05:00	2.63	2016-12-28	04:05:00
1441	KAIT	2016-11-02 06:04:00	3.51	2016-11-02	19:04:00				1441	KAIT	2016-12-27 15:06:00	2.635	2016-12-28	04:06:00
1442	KAIT	2016-11-02 06:05:00	3.515	2016-11-02	19:05:00				1442	KAIT	2016-12-27 15:07:00	2.659	2016-12-28	04:07:00
1443	KAIT	2016-11-02 06:06:00	3.523	2016-11-02	19:06:00				1443	KAIT	2016-12-27 15:08:00	2.669	2016-12-28	04:08:00
1444	KAIT	2016-11-02 06:07:00	3.521	2016-11-02	19:07:00				1444	KAIT	2016-12-27 15:09:00	2.662	2016-12-28	04:09:00
1445	KAIT	2016-11-02 06:08:00	3.512	2016-11-02	19:08:00				1445	KAIT	2016-12-27 15:10:00	2.647	2016-12-28	04:10:00
1446	KAIT	2016-11-02 06:09:00	3.536	2016-11-02	19:09:00				1446	KAIT	2016-12-27 15:11:00	2.641	2016-12-28	04:11:00
1447	KAIT	2016-11-02 06:10:00	3.53	2016-11-02	19:10:00				1447	KAIT	2016-12-27 15:12:00	2.632	2016-12-28	04:12:00
1448	KAIT	2016-11-02 06:11:00	3.516	2016-11-02	19:11:00				1448	KAIT	2016-12-27 15:13:00	2.624	2016-12-28	04:13:00
1449	KAIT	2016-11-02 06:12:00	3.506	2016-11-02	19:12:00				1449	KAIT	2016-12-27 15:14:00	2.615	2016-12-28	04:14:00
1450	KAIT	2016-11-02 06:13:00	3.518	2016-11-02	19:13:00				1450	KAIT	2016-12-27 15:15:00	2.616	2016-12-28	04:15:00
1451	KAIT	2016-11-02 06:14:00	3.523	2016-11-02	19:14:00				1451	KAIT	2016-12-27 15:16:00	2.63	2016-12-28	04:16:00
1452	KAIT	2016-11-02 06:15:00	3.508	2016-11-02	19:15:00				1452	KAIT	2016-12-27 15:17:00	2.641	2016-12-28	04:17:00
1453	KAIT	2016-11-02 06:16:00	3.528	2016-11-02	19:16:00				1453	KAIT	2016-12-27 15:18:00	2.645	2016-12-28	04:18:00
1454	KAIT	2016-11-02 06:17:00	3.53	2016-11-02	19:17:00				1454	KAIT	2016-12-27 15:19:00	2.646	2016-12-28	04:19:00
1455	KAIT	2016-11-02 06:18:00	3.518	2016-11-02	19:18:00				1455	KAIT	2016-12-27 15:20:00	2.65	2016-12-28	04:20:00
1456	KAIT	2016-11-02 06:19:00	3.525	2016-11-02	19:19:00				1456	KAIT	2016-12-27 15:21:00	2.645	2016-12-28	04:21:00
1457	KAIT	2016-11-02 06:20:00	3.515	2016-11-02	19:20:00				1457	KAIT	2016-12-27 15:22:00	2.65	2016-12-28	04:22:00
1458	KAIT	2016-11-02 06:21:00	3.516	2016-11-02	19:21:00				1458	KAIT	2016-12-27 15:23:00	2.65	2016-12-28	04:23:00
1459	KAIT	2016-11-02 06:22:00	3.524	2016-11-02	19:22:00				1459	KAIT	2016-12-27 15:24:00	2.644	2016-12-28	04:24:00
1460	KAIT	2016-11-02 06:23:00	3.531	2016-11-02	19:23:00				1460	KAIT	2016-12-27 15:25:00	2.639	2016-12-28	04:25:00
1461	KAIT	2016-11-02 06:24:00	3.518	2016-11-02	19:24:00				1461	KAIT	2016-12-27 15:26:00	2.643	2016-12-28	04:26:00
1462	KAIT	2016-11-02 06:25:00	3.524	2016-11-02	19:25:00				1462	KAIT	2016-12-27 15:27:00	2.646	2016-12-28	04:27:00
1463	KAIT	2016-11-02 06:26:00	3.534	2016-11-02	19:26:00				1463	KAIT	2016-12-27 15:28:00	2.647	2016-12-28	04:28:00
1464	KAIT	2016-11-02 06:27:00	3.53	2016-11-02	19:27:00				1464	KAIT	2016-12-27 15:29:00	2.655	2016-12-28	04:29:00
1465	KAIT	2016-11-02 06:28:00	3.533	2016-11-02	19:28:00				1465	KAIT	2016-12-27 15:30:00	2.66	2016-12-28	04:30:00
1466	KAIT	2016-11-02 06:29:00	3.512	2016-11-02	19:29:00				1466	KAIT	2016-12-27 15:31:00	2.664	2016-12-28	04:31:00
1467	KAIT	2016-11-02 06:30:00	3.513	2016-11-02	19:30:00				1467	KAIT	2016-12-27 15:32:00	2.665	2016-12-28	04:32:00
1468	KAIT	2016-11-02 06:31:00	3.507	2016-11-02	19:31:00				1468	KAIT	2016-12-27 15:33:00	2.684	2016-12-28	04:33:00
1469	KAIT	2016-11-02 06:32:00	3.531	2016-11-02	19:32:00				1469	KAIT	2016-12-27 15:34:00	2.684	2016-12-28	04:34:00
1470	KAIT	2016-11-02 06:33:00	3.521	2016-11-02	19:33:00				1470	KAIT	2016-12-27 15:35:00	2.694	2016-12-28	04:35:00
1471	KAIT	2016-11-02 06:34:00	3.521	2016-11-02	19:34:00				1471	KAIT	2016-12-27 15:36:00	2.678	2016-12-28	04:36:00
1472	KAIT	2016-11-02 06:35:00	3.528	2016-11-02	19:35:00				1472	KAIT	2016-12-27 15:37:00	2.688	2016-12-28	04:37:00
1473	KAIT	2016-11-02 06:36:00	3.546	2016-11-02	19:36:00				1473	KAIT	2016-12-27 15:38:00	2.683	2016-12-28	04:38:00
1474	KAIT	2016-11-02 06:37:00	3.536	2016-11-02	19:37:00				1474	KAIT	2016-12-27 15:39:00	2.679	2016-12-28	04:39:00
1475	KAIT	2016-11-02 06:38:00	3.567	2016-11-02	19:38:00				1475	KAIT	2016-12-27 15:40:00	2.683	2016-12-28	04:40:00
1476	KAIT	2016-11-02 06:39:00	3.541	2016-11-02	19:39:00				1476	KAIT	2016-12-27 15:41:00	2.681	2016-12-28	04:41:00
1477	KAIT	2016-11-02 06:40:00	3.555	2016-11-02	19:40:00				1477	KAIT	2016-12-27 15:42:00	2.684	2016-12-28	04:42:00
1478	KAIT	2016-11-02 06:41:00	3.556	2016-11-02	19:41:00				1478	KAIT	2016-12-27 15:43:00	2.679	2016-12-28	04:43:00
1479	KAIT	2016-11-02 06:42:00	3.557	2016-11-02	19:42:00				1479	KAIT	2016-12-27 15:44:00	2.684	2016-12-28	04:44:00
1480	KAIT	2016-11-02 06:43:00	3.553	2016-11-02	19:43:00				1480	KAIT	2016-12-27 15:45:00	2.691	2016-12-28	04:45:00
1481	KAIT	2016-11-02 06:44:00	3.554	2016-11-02	19:44:00				1481	KAIT	2016-12-27 15:46:00	2.68	2016-12-28	04:46:00
1482	KAIT	2016-11-02 06:45:00	3.559	2016-11-02	19:45:00				1482	KAIT	2016-12-27 15:47:00	2.673	2016-12-28	04:47:00
1483	KAIT	2016-11-02 06:46:00	3.543	2016-11-02	19:46:00				1483	KAIT	2016-12-27 15:48:00	2.671	2016-12-28	04:48:00
1484	KAIT	2016-11-02 06:47:00	3.558	2016-11-02	19:47:00	HT 1.6			1484	KAIT	2016-12-27 15:49:00	2.659	2016-12-28	04:49:00
1485	KAIT	2016-11-02 06:48:00	3.553	2016-11-02	19:48:00				1485	KAIT	2016-12-27 15:50:00	2.666	2016-12-28	04:50:00
1486	KAIT	2016-11-02 06:49:00	3.549	2016-11-02	19:49:00				1486	KAIT	2016-12-27 15:51:00	2.665	2016-12-28	04:51:00
1487	KAIT	2016-11-02 06:50:00	3.554	2016-11-02	19:50:00				1487	KAIT	2016-12-27 15:52:00	2.663	2016-12-28	04:52:00
1488	KAIT	2016-11-02 06:51:00	3.537	2016-11-02	19:51:00				1488	KAIT	2016-12-27 15:53:00	2.659	2016-12-28	04:53:00
1489	KAIT	2016-11-02 06:52:00	3.551	2016-11-02	19:52:00				1489	KAIT	2016-12-27 15:54:00	2.659	2016-12-28	04:54:00
1490	KAIT	2016-11-02 06:53:00	3.538	2016-11-02	19:53:00				1490	KAIT	2016-12-27 15:55:00	2.666	2016-12-28	04:55:00
1491	KAIT	2016-11-02 06:54:00	3.54	2016-11-02	19:54:00				1491	KAIT	2016-12-27 15:56:00	2.658	2016-12-28	04:56:00
1492	KAIT	2016-11-02 06:55:00	3.541	2016-11-02	19:55:00				1492	KAIT	2016-12-27 15:57:00	2.66	2016-12-28	04:57:00
1493	KAIT	2016-11-02 06:56:00	3.54	2016-11-02	19:56:00				1493	KAIT	2016-12-27 15:58:00	2.664	2016-12-28	04:58:00
1494	KAIT	2016-11-02 06:57:00	3.529	2016-11-02	19:57:00				1494	KAIT	2016-12-27 15:59:00	2.662	2016-12-28	04:59:00
1495	KAIT	2016-11-02 06:58:00	3.552	2016-11-02	19:58:00				1495	KAIT	2016-12-27 16:00:00	2.657	2016-12-28	05:00:00
1496	KAIT	2016-11-02 06:59:00	3.533	2016-11-02	19:59:00				1496	KAIT	2016-12-27 16:01:00	2.658	2016-12-28	05:01:00
1497	KAIT	2016-11-02 07:00:00	3.554	2016-11-02	20:00:00				1497	KAIT	2016-12-27 16:02:00	2.662	2016-12-28	05:02:00
1498	KAIT	2016-11-02 07:01:00	3.535	2016-11-02	20:01:00				1498	KAIT	2016-12-27 16:03:00	2.668	2016-12-28	05:03:00
1499	KAIT	2016-11-02 07:02:00	3.529	2016-11-02	20:02:00				1499	KAIT	2016-12-27 16:04:00	2.681	2016-12-28	05:04:00
1500	KAIT	2016-11-02 07:03:00	3.525	2016-11-02	20:03:00				1500	KAIT	2016-12-27 16:05:00	2.691	2016-12-28	05:05:00
1501	KAIT	2016-11-02 07:04:00	3.511	2016-11-02	20:04:00				1501	KAIT	2016-12-27 16:06:00	2.704	2016-12-28	05:06:00
1502	KAIT	2016-11-02 07:05:00	3.504	2016-11-02	20:05:00				1502	KAIT	2016-12-27 16:07:00	2.692	2016-12-28	05:07:00
1503	KAIT	2016-11-02 07:06:00	3.517	2016-11-02	20:06:00				1503	KAIT	2016-12-27 16:08:00	2.697	2016-12-28	05:08:00
1504	KAIT	2016-11-02 07:07:00	3.514	2016-11-02	20:07:00				1504	KAIT	2016-12-27 16:09:00	2.689	2016-12-28	05:09:00
1505	KAIT	2016-11-02 07:08:00	3.502	2016-11-02	20:08:00				1505	KAIT	2016-12-27 16:10:00	2.678	2016-12-28	05:10:00
1506	KAIT	2016-11-02 07:09:00	3.531	2016-11-02	20:09:00				1506	KAIT	2016-12-27 16:11:00	2.675	2016-12-28	05:11:00
1507	KAIT	2016-11-02 07:10:00	3.539	2016-11-02	20:10:00				1507	KAIT	2016-12-27 16:12:00	2.675	2016-12-28	05:12:00
1508	KAIT	2016-11-02 07:11:00	3.533	2016-11-02	20:11:00				1508	KAIT	2016-12-27 16:13:00	2.675	2016-12-28	05:13:00
1509	KAIT	2016-11-02 07:12:00	3.533	2016-11-02	20:12:00				1509	KAIT	2016-12-27 16:14:00	2.683	2016-12-28	05:14:00
1510	KAIT	2016-11-02 07:13:00	3.533	2016-11-02	20:13:00				1510	KAIT	2016-12-27 16:15:00	2.696	2016-12-28	05:15:00
1511	KAIT	2016-11-02 07:14:00	3.542	2016-11-02	20:14:00				1511	KAIT	2016-12-27 16:16:00	2.697	2016-12-28	05:16:00
1512	KAIT	2016-11-02 07:15:00	3.545	2016-11-02	20:15:00				1512	KAIT	2016-12-27 16:17:00	2.707	2016-12-28	05:17:00
1513	KAIT	2016-11-02 07:16:00	3.551	2016-11-02	20:16:00				1513	KAIT	2016-12-27 16:18:00	2.696	2016-12-28	05:18:00
1514	KAIT	2016-11-02 07:17:00	3.556	2016-11-02	20:17:00				1514	KAIT	2016-12-27 16:19:00	2.697	2016-12-28	05:19:00
1515	KAIT	2016-11-02 07:18:00	3.544	2016-11-02	20:18:00				1515	KAIT	2016-12-27 16:20:00	2.694	2016-12-28	05:20:00
1516	KAIT	2016-11-02 07:19:00	3.546	2016-11-02	20:19:00				1516	KAIT	2016-12-27 16:21:00	2.688	2016-12-28	05:21:00
1517	KAIT	2016-11-02 07:20:00	3.551	2016-11-02	20:20:00				1517	KAIT	2016-12-27 16:22:00	2.687	2016-12-28	05:22:00
1518	KAIT	2016-11-02 07:21:00	3.542	2016-11-02	20:21:00				1518	KAIT	2016-12-27 16:23:00	2.674	2016-12-28	05:23:00
1519	KAIT	2016-11-02 07:22:00	3.528	2016-11-02	20:22:00				1519	KAIT	2016-12-27 16:24:00	2.679	2016-12-28	05:24:00
1520	KAIT	2016-11-02 07:23:00	3.524	2016-11-02	20:23:00				1520	KAIT	2016-12-27 16:25:00	2.657	2016-12-28	05:25:00
1521	KAIT	2016-11-02 07:24:00	3.519	2016-11-02	20:24:00				1521	KAIT	2016-12-27 16:26:00	2.658	2016-12-28	05:26:00
1522	KAIT	2016-11-02 07:25:00	3.519	2016-11-02	20:25:00				1522	KAIT	2016-12-27 16:27:00	2.646	2016-12-28	05:27:00
1523	KAIT	2016-11-02 07:26:00	3.511	2016-11-02	20:26:00				1523	KAIT	2016-12-27 16:28:00	2.633	2016-12-28	05:28:00
1524	KAIT	2016-11-02 07:27:00	3.531	2016-11-02	20:27:00				1524	KAIT	2016-12-27 16:29:00	2.627	2016-12-28	05:29:00
1525	KAIT	2016-11-02 07:28:00	3.493	2016-11-02	20:28:00				1525	KAIT	2016-12-27 16:30:00	2.643	2016-12-28	05:30:00
1526	KAIT	2016-11-02 07:29:00	3.488	2016-11-02	20:29:00				1526	KAIT	2016-12-27 16:31:00	2.648	2016-12-28	05:31:00
1527	KAIT	2016-11-02 07:30:00	3.484	2016-11-02	20:30:00				1527	KAIT	2016-12-27 16:32:00	2.64	2016-12-28	05:32:00
1528	KAIT	2016-11-02 07:31:00	3.503	2016-11-02	20:31:00				1528	KAIT	2016-12-27 16:33:00	2.639	2016-12-28	05:33:00
1529	KAIT	2016-11-02 07:32:00	3.5	2016-11-02	20:32:00				1529	KAIT	2016-12-27 16:34:00	2.632	2016-12-28	05:34:00
1530	KAIT	2016-11-02 07:33:00	3.488	2016-11-02	20:33:00				1530	KAIT	2016-12-27 16:35:00	2.639	2016-12-28	05:35:00
1531	KAIT	2016-11-02 07:34:00	3.491	2016-11-02	20:34:00				1531	KAIT	2016-12-27 16:36:00	2.651	2016-12-28	05:36:00
1532	KAIT	2016-11-02 07:35:00	3.489	2016-11-02	20:35:00				1532	KAIT	2016-12-27 16:37:00	2.66	2016-12-28	05:37:00
1533	KAIT	2016-11-02 07:36:00	3.478	2016-11-02	20:36:00				1533	KAIT	2016-12-27 16:38:00	2.666	2016-12-28	05:38:00
1534	KAIT	2016-11-02 07:37:00	3.483	2016-11-02	20:37:00				1534	KAIT	2016-12-27 16:39:00	2.684	2016-12-28	05:39:00
1535	KAIT	2016-11-02 07:38:00	3.49	2016-11-02	20:38:00				1535	KAIT	2016-12-27 16:40:00	2.674	2016-12-28	05:40:00
1536	KAIT	2016-11-02 07:39:00	3.489	2016-11-02	20:39:00				1536	KAIT	2016-12-27 16:41:00	2.692	2016-12-28	05:41:00
1537	KAIT	2016-11-02 07:40:00	3.489	2016-11-02	20:40:00				1537	KAIT	2016-12-27 16:42:00	2.69	2016-12-28	05:42:00
1538	KAIT	2016-11-02 07:41:00	3.491	2016-11-02	20:41:00				1538	KAIT	2016-12-27 16:43:00	2.677	2016-12-28	05:43:00
1539	KAIT	2016-11-02 07:42:00	3.489	2016-11-02	20:42:00				1539	KAIT	2016-12-27 16:44:00	2.679	2016-12-28	05:44:00
1540	KAIT	2016-11-02 07:43:00	3.503	2016-11-02	20:43:00				1540	KAIT	2016-12-27 16:45:00	2.66	2016-12-28	05:45:00
1541	KAIT	2016-11-02 07:44:00	3.507	2016-11-02	20:44:00				1541	KAIT	2016-12-27 16:46:00	2.649	2016-12-28	05:46:00
1542	KAIT	2016-11-02 07:45:00	3.501	2016-11-02	20:45:00				1542	KAIT	2016-12-27 16:47:00	2.641	2016-12-28	05:47:00
1543	KAIT	2016-11-02 07:46:00	3.502	2016-11-02	20:46:00				1543	KAIT	2016-12-27 16:48:00	2.645	2016-12-28	05:48:00
1544	KAIT	2016-11-02 07:47:00	3.513	2016-11-02	20:47:00				1544	KAIT	2016-12-27 16:49:00	2.654	2016-12-28	05:49:00
1545	KAIT	2016-11-02 07:48:00	3.506	2016-11-02	20:48:00				1545	KAIT	2016-12-27 16:50:00	2.628	2016-12-28	05:50:00
1546	KAIT	2016-11-02 07:49:00	3.503	2016-11-02	20:49:00				1546	KAIT	2016-12-27 16:51:00	2.626	2016-12-28	05:51:00
1547	KAIT	2016-11-02 07:50:00	3.496	2016-11-02	20:50:00				1547	KAIT	2016-12-27 16:52:00	2.634	2016-12-28	05:52:00
1548	KAIT	2016-11-02 07:51:00	3.485	2016-11-02	20:51:00				1548	KAIT	2016-12-27 16:53:00	2.63	2016-12-28	05:53:00
1549	KAIT	2016-11-02 07:52:00	3.479	2016-11-02	20:52:00				1549	KAIT	2016-12-27 16:54:00	2.638	2016-12-28	05:54:00
1550	KAIT	2016-11-02 07:53:00	3.478	2016-11-02	20:53:00				1550	KAIT	2016-12-27 16:55:00	2.632	2016-12-28	05:55:00
1551	KAIT	2016-11-02 07:54:00	3.463	2016-11-02	20:54:00				1551	KAIT	2016-12-27 16:56:00	2.636	2016-12-28	05:56:00
1552	KAIT	2016-11-02 07:55:00	3.475	2016-11-02	20:55:00				1552	KAIT	2016-12-27 16:57:00	2.63	2016-12-28	05:57:00
1553	KAIT	2016-11-02 07:56:00	3.472	2016-11-02	20:56:00				1553	KAIT	2016-12-27 16:58:00	2.624	2016-12-28	05:58:00
1554	KAIT	2016-11-02 07:57:00	3.447	2016-11-02	20:57:00				1554	KAIT	2016-12-27 16:59:00	2.614	2016-12-28	05:59:00
1555	KAIT	2016-11-02 07:58:00	3.434	2016-11-02	20:58:00				1555	KAIT	2016-12-27 17:00:00	2.608	2016-12-28	06:00:00
1556	KAIT	2016-11-02 07:59:00	3.456	2016-11-02	20:59:00				1556	KAIT	2016-12-27 17:01:00	2.603	2016-12-28	06:01:00
1557	KAIT	2016-11-02 08:00:00	3.44	2016-11-02	21:00:00				1557	KAIT	2016-12-27 17:02:00	2.599	2016-12-28	06:02:00
1558	KAIT	2016-11-02 08:01:00	3.443	2016-11-02	21:01:00				1558	KAIT	2016-12-27 17:03:00	2.592	2016-12-28	06:03:00
1559	KAIT	2016-11-02 08:02:00	3.44	2016-11-02	21:02:00				1559	KAIT	2016-12-27 17:04:00	2.593	2016-12-28	06:04:00
1560	KAIT	2016-11-02 08:03:00	3.418	2016-11-02	21:03:00				1560	KAIT	2016-12-27 17:05:00	2.569	2016-12-28	06:05:00
1561	KAIT	2016-11-02 08:04:00	3.418	2016-11-02	21:04:00				1561	KAIT	2016-12-27 17:06:00	2.582	2016-12-28	06:06:00
1562	KAIT	2016-11-02 08:05:00	3.414	2016-11-02	21:05:00				1562	KAIT	2016-12-27 17:07:00	2.579	2016-12-28	06:07:00
1563	KAIT	2016-11-02 08:06:00	3.43	2016-11-02	21:06:00				1563	KAIT	2016-12-27 17:08:00	2.57	2016-12-28	06:08:00
1564	KAIT	2016-11-02 08:07:00	3.434	2016-11-02	21:07:00				1564	KAIT	2016-12-27 17:09:00	2.567	2016-12-28	06:09:00
1565	KAIT	2016-11-02 08:08:00	3.423	2016-11-02	21:08:00				1565	KAIT	2016-12-27 17:10:00	2.583	2016-12-28	06:10:00
1566	KAIT	2016-11-02 08:09:00	3.43	2016-11-02	21:09:00				1566	KAIT	2016-12-27 17:11:00	2.592	2016-12-28	06:11:00
1567	KAIT	2016-11-02 08:10:00	3.434	2016-11-02	21:10:00				1567	KAIT	2016-12-27 17:12:00	2.593	2016-12-28	06:12:00
1568	KAIT	2016-11-02 08:11:00	3.413	2016-11-02	21:11:00				1568	KAIT	2016-12-27 17:13:00	2.59	2016-12-28	06:13:00
1569	KAIT	2016-11-02 08:12:00	3.426	2016-11-02	21:12:00				1569	KAIT	2016-12-27 17:14:00	2.585	2016-12-28	06:14:00
1570	KAIT	2016-11-02 08:13:00	3.421	2016-11-02	21:13:00				1570	KAIT	2016-12-27 17:15:00	2.595	2016-12-28	06:15:00
1571	KAIT	2016-11-02 08:14:00	3.394	2016-11-02	21:14:00				1571	KAIT	2016-12-27 17:16:00	2.592	2016-12-28	06:16:00
1572	KAIT	2016-11-02 08:15:00	3.41	2016-11-02	21:15:00				1572	KAIT	2016-12-27 17:17:00	2.59	2016-12-28	06:17:00
1573	KAIT	2016-11-02 08:16:00	3.393	2016-11-02	21:16:00				1573	KAIT	2016-12-27 17:18:00	2.576	2016-12-28	06:18:00
1574	KAIT	2016-11-02 08:17:00	3.408	2016-11-02	21:17:00				1574	KAIT	2016-12-27 17:19:00	2.58	2016-12-28	06:19:00
1575	KAIT	2016-11-02 08:18:00	3.407	2016-11-02	21:18:00				1575	KAIT	2016-12-27 17:20:00	2.565	2016-12-28	06:20:00
1576	KAIT	2016-11-02 08:19:00	3.402	2016-11-02	21:19:00				1576	KAIT	2016-12-27 17:21:00	2.537	2016-12-28	06:21:00
1577	KAIT	2016-11-02 08:20:00	3.384	2016-11-02	21:20:00				1577	KAIT	2016-12-27 17:22:00	2.552	2016-12-28	06:22:00
1578	KAIT	2016-11-02 08:21:00	3.39	2016-11-02	21:21:00				1578	KAIT	2016-12-27 17:23:00	2.55	2016-12-28	06:23:00
1579	KAIT	2016-11-02 08:22:00	3.384	2016-11-02	21:22:00				1579	KAIT	2016-12-27 17:24:00	2.543	2016-12-28	06:24:00
1580	KAIT	2016-11-02 08:23:00	3.385	2016-11-02	21:23:00				1580	KAIT	2016-12-27 17:25:00	2.544	2016-12-28	06:25:00
1581	KAIT	2016-11-02 08:24:00	3.39	2016-11-02	21:24:00				1581	KAIT	2016-12-27 17:26:00	2.55	2016-12-28	06:26:00
1582	KAIT	2016-11-02 08:25:00	3.383	2016-11-02	21:25:00				1582	KAIT	2016-12-27 17:27:00	2.554	2016-12-28	06:27:00
1583	KAIT	2016-11-02 08:26:00	3.359	2016-11-02	21:26:00				1583	KAIT	2016-12-27 17:28:00	2.563	2016-12-28	06:28:00
1584	KAIT	2016-11-02 08:27:00	3.371	2016-11-02	21:27:00				1584	KAIT	2016-12-27 17:29:00	2.555	2016-12-28	06:29:00
1585	KAIT	2016-11-02 08:28:00	3.384	2016-11-02	21:28:00				1585	KAIT	2016-12-27 17:30:00	2.56	2016-12-28	06:30:00
1586	KAIT	2016-11-02 08:29:00	3.358	2016-11-02	21:29:00				1586	KAIT	2016-12-27 17:31:00	2.559	2016-12-28	06:31:00
1587	KAIT	2016-11-02 08:30:00	3.367	2016-11-02	21:30:00				1587	KAIT	2016-12-27 17:32:00	2.539	2016-12-28	06:32:00
1588	KAIT	2016-11-02 08:31:00	3.359	2016-11-02	21:31:00				1588	KAIT	2016-12-27 17:33:00	2.537	2016-12-28	06:33:00
1589	KAIT	2016-11-02 08:32:00	3.354	2016-11-02	21:32:00				1589	KAIT	2016-12-27 17:34:00	2.525	2016-12-28	06:34:00
1590	KAIT	2016-11-02 08:33:00	3.352	2016-11-02	21:33:00				1590	KAIT	2016-12-27 17:35:00	2.514	2016-12-28	06:35:00
1591	KAIT	2016-11-02 08:34:00	3.344	2016-11-02	21:34:00				1591	KAIT	2016-12-27 17:36:00	2.504	2016-12-28	06:36:00
1592	KAIT	2016-11-02 08:35:00	3.331	2016-11-02	21:35:00				1592	KAIT	2016-12-27 17:37:00	2.498	2016-12-28	06:37:00
1593	KAIT	2016-11-02 08:36:00	3.317	2016-11-02	21:36:00				1593	KAIT	2016-12-27 17:38:00	2.499	2016-12-28	06:38:00
1594	KAIT	2016-11-02 08:37:00	3.303	2016-11-02	21:37:00				1594	KAIT	2016-12-27 17:39:00	2.475	2016-12-28	06:39:00
1595	KAIT	2016-11-02 08:38:00	3.322	2016-11-02	21:38:00				1595	KAIT	2016-12-27 17:40:00	2.471	2016-12-28	06:40:00
1596	KAIT	2016-11-02 08:39:00	3.32	2016-11-02	21:39:00				1596	KAIT	2016-12-27 17:41:00	2.462	2016-12-28	06:41:00
1597	KAIT	2016-11-02 08:40:00	3.307	2016-11-02	21:40:00				1597	KAIT	2016-12-27 17:42:00	2.474	2016-12-28	06:42:00
1598	KAIT	2016-11-02 08:41:00	3.29	2016-11-02	21:41:00				1598	KAIT	2016-12-27 17:43:00	2.471	2016-12-28	06:43:00
1599	KAIT	2016-11-02 08:42:00	3.308	2016-11-02	21:42:00				1599	KAIT	2016-12-27 17:44:00	2.48	2016-12-28	06:44:00
1600	KAIT	2016-11-02 08:43:00	3.305	2016-11-02	21:43:00				1600	KAIT	2016-12-27 17:45:00	2.481	2016-12-28	06:45:00
1601	KAIT	2016-11-02 08:44:00	3.297	2016-11-02	21:44:00				1601	KAIT	2016-12-27 17:46:00	2.467	2016-12-28	06:46:00
1602	KAIT	2016-11-02 08:45:00	3.301	2016-11-02	21:45:00				1602	KAIT	2016-12-27 17:47:00	2.468	2016-12-28	06:47:00
1603	KAIT	2016-11-02 08:46:00	3.279	2016-11-02	21:46:00				1603	KAIT	2016-12-27 17:48:00	2.479	2016-12-28	06:48:00
1604	KAIT	2016-11-02 08:47:00	3.303	2016-11-02	21:47:00				1604	KAIT	2016-12-27 17:49:00	2.464	2016-12-28	06:49:00
1605	KAIT	2016-11-02 08:48:00	3.283	2016-11-02	21:48:00				1605	KAIT	2016-12-27 17:50:00	2.472	2016-12-28	06:50:00
1606	KAIT	2016-11-02 08:49:00	3.269	2016-11-02	21:49:00				1606	KAIT	2016-12-27 17:51:00	2.454	2016-12-28	06:51:00
1607	KAIT	2016-11-02 08:50:00	3.28	2016-11-02	21:50:00				1607	KAIT	2016-12-27 17:52:00	2.453	2016-12-28	06:52:00
1608	KAIT	2016-11-02 08:51:00	3.253	2016-11-02	21:51:00				1608	KAIT	2016-12-27 17:53:00	2.464	2016-12-28	06:53:00
1609	KAIT	2016-11-02 08:52:00	3.251	2016-11-02	21:52:00				1609	KAIT	2016-12-27 17:54:00	2.462	2016-12-28	06:54:00
1610	KAIT	2016-11-02 08:53:00	3.249	2016-11-02	21:53:00				1610	KAIT	2016-12-27 17:55:00	2.447	2016-12-28	06:55:00
1611	KAIT	2016-11-02 08:54:00	3.242	2016-11-02	21:54:00				1611	KAIT	2016-12-27 17:56:00	2.434	2016-12-28	06:56:00
1612	KAIT	2016-11-02 08:55:00	3.239	2016-11-02	21:55:00				1612	KAIT	2016-12-27 17:57:00	2.433	2016-12-28	06:57:00
1613	KAIT	2016-11-02 08:56:00	3.269	2016-11-02	21:56:00				1613	KAIT	2016-12-27 17:58:00	2.426	2016-12-28	06:58:00
1614	KAIT	2016-11-02 08:57:00	3.249	2016-11-02	21:57:00				1614	KAIT	2016-12-27 17:59:00	2.433	2016-12-28	06:59:00
1615	KAIT	2016-11-02 08:58:00	3.24	2016-11-02	21:58:00				1615	KAIT	2016-12-27 18:00:00	2.419	2016-12-28	07:00:00
1616	KAIT	2016-11-02 08:59:00	3.245	2016-11-02	21:59:00				1616	KAIT	2016-12-27 18:01:00	2.4	2016-12-28	07:01:00
1617	KAIT	2016-11-02 09:00:00	3.241	2016-11-02	22:00:00				1617	KAIT	2016-12-27 18:02:00	2.406	2016-12-28	07:02:00
1618	KAIT	2016-11-02 09:01:00	3.241	2016-11-02	22:01:00				1618	KAIT	2016-12-27 18:03:00	2.407	2016-12-28	07:03:00
1619	KAIT	2016-11-02 09:02:00	3.242	2016-11-02	22:02:00				1619	KAIT	2016-12-27 18:04:00	2.393	2016-12-28	07:04:00
1620	KAIT	2016-11-02 09:03:00	3.231	2016-11-02	22:03:00				1620	KAIT	2016-12-27 18:05:00	2.397	2016-12-28	07:05:00
1621	KAIT	2016-11-02 09:04:00	3.22	2016-11-02	22:04:00				1621	KAIT	2016-12-27 18:06:00	2.387	2016-12-28	07:06:00
1622	KAIT	2016-11-02 09:05:00	3.232	2016-11-02	22:05:00				1622	KAIT	2016-12-27 18:07:00	2.383	2016-12-28	07:07:00
1623	KAIT	2016-11-02 09:06:00	3.227	2016-11-02	22:06:00				1623	KAIT	2016-12-27 18:08:00	2.383	2016-12-28	07:08:00
1624	KAIT	2016-11-02 09:07:00	3.21	2016-11-02	22:07:00				1624	KAIT	2016-12-27 18:09:00	2.375	2016-12-28	07:09:00
1625	KAIT	2016-11-02 09:08:00	3.227	2016-11-02	22:08:00				1625	KAIT	2016-12-27 18:10:00	2.366	2016-12-28	07:10:00
1626	KAIT	2016-11-02 09:09:00	3.221	2016-11-02	22:09:00				1626	KAIT	2016-12-27 18:11:00	2.357	2016-12-28	07:11:00
1627	KAIT	2016-11-02 09:10:00	3.211	2016-11-02	22:10:00				1627	KAIT	2016-12-27 18:12:00	2.351	2016-12-28	07:12:00
1628	KAIT	2016-11-02 09:11:00	3.208	2016-11-02	22:11:00				1628	KAIT	2016-12-27 18:13:00	2.353	2016-12-28	07:13:00
1629	KAIT	2016-11-02 09:12:00	3.189	2016-11-02	22:12:00				1629	KAIT	2016-12-27 18:14:00	2.348	2016-12-28	07:14:00
1630	KAIT	2016-11-02 09:13:00	3.181	2016-11-02	22:13:00				1630	KAIT	2016-12-27 18:15:00	2.333	2016-12-28	07:15:00
1631	KAIT	2016-11-02 09:14:00	3.19	2016-11-02	22:14:00				1631	KAIT	2016-12-27 18:16:00	2.32	2016-12-28	07:16:00
1632	KAIT	2016-11-02 09:15:00	3.173	2016-11-02	22:15:00				1632	KAIT	2016-12-27 18:17:00	2.322	2016-12-28	07:17:00
1633	KAIT	2016-11-02 09:16:00	3.168	2016-11-02	22:16:00				1633	KAIT	2016-12-27 18:18:00	2.32	2016-12-28	07:18:00
1634	KAIT	2016-11-02 09:17:00	3.158	2016-11-02	22:17:00				1634	KAIT	2016-12-27 18:19:00	2.318	2016-12-28	07:19:00
1635	KAIT	2016-11-02 09:18:00	3.148	2016-11-02	22:18:00				1635	KAIT	2016-12-27 18:20:00	2.313	2016-12-28	07:20:00
1636	KAIT	2016-11-02 09:19:00	3.162	2016-11-02	22:19:00				1636	KAIT	2016-12-27 18:21:00	2.322	2016-12-28	07:21:00
1637	KAIT	2016-11-02 09:20:00	3.154	2016-11-02	22:20:00				1637	KAIT	2016-12-27 18:22:00	2.313	2016-12-28	07:22:00
1638	KAIT	2016-11-02 09:21:00	3.16	2016-11-02	22:21:00				1638	KAIT	2016-12-27 18:23:00	2.328	2016-12-28	07:23:00
1639	KAIT	2016-11-02 09:22:00	3.125	2016-11-02	22:22:00				1639	KAIT	2016-12-27 18:24:00	2.315	2016-12-28	07:24:00
1640	KAIT	2016-11-02 09:23:00	3.129	2016-11-02	22:23:00				1640	KAIT	2016-12-27 18:25:00	2.335	2016-12-28	07:25:00
1641	KAIT	2016-11-02 09:24:00	3.138	2016-11-02	22:24:00				1641	KAIT	2016-12-27 18:26:00	2.3	2016-12-28	07:26:00
1642	KAIT	2016-11-02 09:25:00	3.119	2016-11-02	22:25:00				1642	KAIT	2016-12-27 18:27:00	2.281	2016-12-28	07:27:00
1643	KAIT	2016-11-02 09:26:00	3.123	2016-11-02	22:26:00				1643	KAIT	2016-12-27 18:28:00	2.301	2016-12-28	07:28:00
1644	KAIT	2016-11-02 09:27:00	3.115	2016-11-02	22:27:00				1644	KAIT	2016-12-27 18:29:00	2.258	2016-12-28	07:29:00
1645	KAIT	2016-11-02 09:28:00	3.106	2016-11-02	22:28:00				1645	KAIT	2016-12-27 18:30:00	2.255	2016-12-28	07:30:00
1646	KAIT	2016-11-02 09:29:00	3.102	2016-11-02	22:29:00				1646	KAIT	2016-12-27 18:31:00	2.25	2016-12-28	07:31:00
1647	KAIT	2016-11-02 09:30:00	3.128	2016-11-02	22:30:00				1647	KAIT	2016-12-27 18:32:00	2.26	2016-12-28	07:32:00
1648	KAIT	2016-11-02 09:31:00	3.116	2016-11-02	22:31:00				1648	KAIT	2016-12-27 18:33:00	2.253	2016-12-28	07:33:00
1649	KAIT	2016-11-02 09:32:00	3.112	2016-11-02	22:32:00				1649	KAIT	2016-12-27 18:34:00	2.257	2016-12-28	07:34:00
1650	KAIT	2016-11-02 09:33:00	3.115	2016-11-02	22:33:00				1650	KAIT	2016-12-27 18:35:00	2.257	2016-12-28	07:35:00
1651	KAIT	2016-11-02 09:34:00	3.092	2016-11-02	22:34:00				1651	KAIT	2016-12-27 18:36:00	2.256	2016-12-28	07:36:00
1652	KAIT	2016-11-02 09:35:00	3.112	2016-11-02	22:35:00				1652	KAIT	2016-12-27 18:37:00	2.26	2016-12-28	07:37:00
1653	KAIT	2016-11-02 09:36:00	3.102	2016-11-02	22:36:00				1653	KAIT	2016-12-27 18:38:00	2.241	2016-12-28	07:38:00
1654	KAIT	2016-11-02 09:37:00	3.083	2016-11-02	22:37:00				1654	KAIT	2016-12-27 18:39:00	2.253	2016-12-28	07:39:00
1655	KAIT	2016-11-02 09:38:00	3.09	2016-11-02	22:38:00				1655	KAIT	2016-12-27 18:40:00	2.237	2016-12-28	07:40:00
1656	KAIT	2016-11-02 09:39:00	3.073	2016-11-02	22:39:00				1656	KAIT	2016-12-27 18:41:00	2.24	2016-12-28	07:41:00
1657	KAIT	2016-11-02 09:40:00	3.076	2016-11-02	22:40:00				1657	KAIT	2016-12-27 18:42:00	2.244	2016-12-28	07:42:00
1658	KAIT	2016-11-02 09:41:00	3.056	2016-11-02	22:41:00				1658	KAIT	2016-12-27 18:43:00	2.227	2016-12-28	07:43:00
1659	KAIT	2016-11-02 09:42:00	3.054	2016-11-02	22:42:00				1659	KAIT	2016-12-27 18:44:00	2.226	2016-12-28	07:44:00
1660	KAIT	2016-11-02 09:43:00	3.068	2016-11-02	22:43:00				1660	KAIT	2016-12-27 18:45:00	2.228	2016-12-28	07:45:00
1661	KAIT	2016-11-02 09:44:00	3.036	2016-11-02	22:44:00				1661	KAIT	2016-12-27 18:46:00	2.204	2016-12-28	07:46:00
1662	KAIT	2016-11-02 09:45:00	3.031	2016-11-02	22:45:00				1662	KAIT	2016-12-27 18:47:00	2.206	2016-12-28	07:47:00
1663	KAIT	2016-11-02 09:46:00	3.045	2016-11-02	22:46:00				1663	KAIT	2016-12-27 18:48:00	2.17	2016-12-28	07:48:00
1664	KAIT	2016-11-02 09:47:00	3.028	2016-11-02	22:47:00				1664	KAIT	2016-12-27 18:49:00	2.179	2016-12-28	07:49:00
1665	KAIT	2016-11-02 09:48:00	3.041	2016-11-02	22:48:00				1665	KAIT	2016-12-27 18:50:00	2.176	2016-12-28	07:50:00
1666	KAIT	2016-11-02 09:49:00	3.037	2016-11-02	22:49:00				1666	KAIT	2016-12-27 18:51:00	2.178	2016-12-28	07:51:00
1667	KAIT	2016-11-02 09:50:00	3.016	2016-11-02	22:50:00				1667	KAIT	2016-12-27 18:52:00	2.165	2016-12-28	07:52:00
1668	KAIT	2016-11-02 09:51:00	3.026	2016-11-02	22:51:00				1668	KAIT	2016-12-27 18:53:00	2.162	2016-12-28	07:53:00
1669	KAIT	2016-11-02 09:52:00	3.023	2016-11-02	22:52:00				1669	KAIT	2016-12-27 18:54:00	2.179	2016-12-28	07:54:00
1670	KAIT	2016-11-02 09:53:00	3.001	2016-11-02	22:53:00				1670	KAIT	2016-12-27 18:55:00	2.173	2016-12-28	07:55:00
1671	KAIT	2016-11-02 09:54:00	3.019	2016-11-02	22:54:00				1671	KAIT	2016-12-27 18:56:00	2.158	2016-12-28	07:56:00
1672	KAIT	2016-11-02 09:55:00	3.011	2016-11-02	22:55:00				1672	KAIT	2016-12-27 18:57:00	2.139	2016-12-28	07:57:00
1673	KAIT	2016-11-02 09:56:00	2.985	2016-11-02	22:56:00				1673	KAIT	2016-12-27 18:58:00	2.152	2016-12-28	07:58:00
1674	KAIT	2016-11-02 09:57:00	2.996	2016-11-02	22:57:00				1674	KAIT	2016-12-27 18:59:00	2.127	2016-12-28	07:59:00
1675	KAIT	2016-11-02 09:58:00	2.986	2016-11-02	22:58:00				1675	KAIT	2016-12-27 19:00:00	2.107	2016-12-28	08:00:00
1676	KAIT	2016-11-02 09:59:00	2.979	2016-11-02	22:59:00				1676	KAIT	2016-12-27 19:01:00	2.111	2016-12-28	08:01:00
1677	KAIT	2016-11-02 10:00:00	2.994	2016-11-02	23:00:00				1677	KAIT	2016-12-27 19:02:00	2.105	2016-12-28	08:02:00
1678	KAIT	2016-11-02 10:01:00	2.988	2016-11-02	23:01:00				1678	KAIT	2016-12-27 19:03:00	2.083	2016-12-28	08:03:00
1679	KAIT	2016-11-02 10:02:00	2.986	2016-11-02	23:02:00				1679	KAIT	2016-12-27 19:04:00	2.086	2016-12-28	08:04:00
1680	KAIT	2016-11-02 10:03:00	2.972	2016-11-02	23:03:00				1680	KAIT	2016-12-27 19:05:00	2.086	2016-12-28	08:05:00
1681	KAIT	2016-11-02 10:04:00	2.947	2016-11-02	23:04:00				1681	KAIT	2016-12-27 19:06:00	2.077	2016-12-28	08:06:00
1682	KAIT	2016-11-02 10:05:00	2.961	2016-11-02	23:05:00				1682	KAIT	2016-12-27 19:07:00	2.071	2016-12-28	08:07:00
1683	KAIT	2016-11-02 10:06:00	2.944	2016-11-02	23:06:00				1683	KAIT	2016-12-27 19:08:00	2.074	2016-12-28	08:08:00
1684	KAIT	2016-11-02 10:07:00	2.945	2016-11-02	23:07:00				1684	KAIT	2016-12-27 19:09:00	2.089	2016-12-28	08:09:00
1685	KAIT	2016-11-02 10:08:00	2.934	2016-11-02	23:08:00				1685	KAIT	2016-12-27 19:10:00	2.096	2016-12-28	08:10:00
1686	KAIT	2016-11-02 10:09:00	2.937	2016-11-02	23:09:00				1686	KAIT	2016-12-27 19:11:00	2.099	2016-12-28	08:11:00
1687	KAIT	2016-11-02 10:10:00	2.944	2016-11-02	23:10:00				1687	KAIT	2016-12-27 19:12:00	2.104	2016-12-28	08:12:00
1688	KAIT	2016-11-02 10:11:00	2.915	2016-11-02	23:11:00				1688	KAIT	2016-12-27 19:13:00	2.096	2016-12-28	08:13:00
1689	KAIT	2016-11-02 10:12:00	2.897	2016-11-02	23:12:00				1689	KAIT	2016-12-27 19:14:00	2.083	2016-12-28	08:14:00
1690	KAIT	2016-11-02 10:13:00	2.925	2016-11-02	23:13:00				1690	KAIT	2016-12-27 19:15:00	2.064	2016-12-28	08:15:00
1691	KAIT	2016-11-02 10:14:00	2.912	2016-11-02	23:14:00				1691	KAIT	2016-12-27 19:16:00	2.057	2016-12-28	08:16:00
1692	KAIT	2016-11-02 10:15:00	2.89	2016-11-02	23:15:00				1692	KAIT	2016-12-27 19:17:00	2.038	2016-12-28	08:17:00
1693	KAIT	2016-11-02 10:16:00	2.904	2016-11-02	23:16:00				1693	KAIT	2016-12-27 19:18:00	2.039	2016-12-28	08:18:00
1694	KAIT	2016-11-02 10:17:00	2.915	2016-11-02	23:17:00				1694	KAIT	2016-12-27 19:19:00	2.019	2016-12-28	08:19:00
1695	KAIT	2016-11-02 10:18:00	2.923	2016-11-02	23:18:00				1695	KAIT	2016-12-27 19:20:00	2.028	2016-12-28	08:20:00
1696	KAIT	2016-11-02 10:19:00	2.903	2016-11-02	23:19:00				1696	KAIT	2016-12-27 19:21:00	2.024	2016-12-28	08:21:00
1697	KAIT	2016-11-02 10:20:00	2.911	2016-11-02	23:20:00				1697	KAIT	2016-12-27 19:22:00	2.026	2016-12-28	08:22:00
1698	KAIT	2016-11-02 10:21:00	2.902	2016-11-02	23:21:00				1698	KAIT	2016-12-27 19:23:00	2.033	2016-12-28	08:23:00
1699	KAIT	2016-11-02 10:22:00	2.901	2016-11-02	23:22:00				1699	KAIT	2016-12-27 19:24:00	2.029	2016-12-28	08:24:00
1700	KAIT	2016-11-02 10:23:00	2.899	2016-11-02	23:23:00				1700	KAIT	2016-12-27 19:25:00	2.023	2016-12-28	08:25:00
1701	KAIT	2016-11-02 10:24:00	2.887	2016-11-02	23:24:00				1701	KAIT	2016-12-27 19:26:00	2.019	2016-12-28	08:26:00
1702	KAIT	2016-11-02 10:25:00	2.884	2016-11-02	23:25:00				1702	KAIT	2016-12-27 19:27:00	2.011	2016-12-28	08:27:00
1703	KAIT	2016-11-02 10:26:00	2.877	2016-11-02	23:26:00				1703	KAIT	2016-12-27 19:28:00	1.993	2016-12-28	08:28:00
1704	KAIT	2016-11-02 10:27:00	2.869	2016-11-02	23:27:00				1704	KAIT	2016-12-27 19:29:00	1.996	2016-12-28	08:29:00
1705	KAIT	2016-11-02 10:28:00	2.852	2016-11-02	23:28:00				1705	KAIT	2016-12-27 19:30:00	1.988	2016-12-28	08:30:00
1706	KAIT	2016-11-02 10:29:00	2.851	2016-11-02	23:29:00				1706	KAIT	2016-12-27 19:31:00	1.974	2016-12-28	08:31:00
1707	KAIT	2016-11-02 10:30:00	2.831	2016-11-02	23:30:00				1707	KAIT	2016-12-27 19:32:00	1.986	2016-12-28	08:32:00
1708	KAIT	2016-11-02 10:31:00	2.833	2016-11-02	23:31:00				1708	KAIT	2016-12-27 19:33:00	1.956	2016-12-28	08:33:00
1709	KAIT	2016-11-02 10:32:00	2.835	2016-11-02	23:32:00				1709	KAIT	2016-12-27 19:34:00	1.96	2016-12-28	08:34:00
1710	KAIT	2016-11-02 10:33:00	2.815	2016-11-02	23:33:00				1710	KAIT	2016-12-27 19:35:00	1.938	2016-12-28	08:35:00
1711	KAIT	2016-11-02 10:34:00	2.827	2016-11-02	23:34:00				1711	KAIT	2016-12-27 19:36:00	1.944	2016-12-28	08:36:00
1712	KAIT	2016-11-02 10:35:00	2.821	2016-11-02	23:35:00				1712	KAIT	2016-12-27 19:37:00	1.951	2016-12-28	08:37:00
1713	KAIT	2016-11-02 10:36:00	2.832	2016-11-02	23:36:00				1713	KAIT	2016-12-27 19:38:00	1.95	2016-12-28	08:38:00
1714	KAIT	2016-11-02 10:37:00	2.829	2016-11-02	23:37:00				1714	KAIT	2016-12-27 19:39:00	1.93	2016-12-28	08:39:00
1715	KAIT	2016-11-02 10:38:00	2.822	2016-11-02	23:38:00				1715	KAIT	2016-12-27 19:40:00	1.936	2016-12-28	08:40:00
1716	KAIT	2016-11-02 10:39:00	2.797	2016-11-02	23:39:00				1716	KAIT	2016-12-27 19:41:00	1.92	2016-12-28	08:41:00
1717	KAIT	2016-11-02 10:40:00	2.816	2016-11-02	23:40:00				1717	KAIT	2016-12-27 19:42:00	1.93	2016-12-28	08:42:00
1718	KAIT	2016-11-02 10:41:00	2.808	2016-11-02	23:41:00				1718	KAIT	2016-12-27 19:43:00	1.933	2016-12-28	08:43:00
1719	KAIT	2016-11-02 10:42:00	2.779	2016-11-02	23:42:00				1719	KAIT	2016-12-27 19:44:00	1.94	2016-12-28	08:44:00
1720	KAIT	2016-11-02 10:43:00	2.797	2016-11-02	23:43:00				1720	KAIT	2016-12-27 19:45:00	1.935	2016-12-28	08:45:00
1721	KAIT	2016-11-02 10:44:00	2.793	2016-11-02	23:44:00				1721	KAIT	2016-12-27 19:46:00	1.935	2016-12-28	08:46:00
1722	KAIT	2016-11-02 10:45:00	2.773	2016-11-02	23:45:00				1722	KAIT	2016-12-27 19:47:00	1.929	2016-12-28	08:47:00
1723	KAIT	2016-11-02 10:46:00	2.787	2016-11-02	23:46:00				1723	KAIT	2016-12-27 19:48:00	1.95	2016-12-28	08:48:00
1724	KAIT	2016-11-02 10:47:00	2.79	2016-11-02	23:47:00				1724	KAIT	2016-12-27 19:49:00	1.938	2016-12-28	08:49:00
1725	KAIT	2016-11-02 10:48:00	2.791	2016-11-02	23:48:00				1725	KAIT	2016-12-27 19:50:00	1.918	2016-12-28	08:50:00
1726	KAIT	2016-11-02 10:49:00	2.77	2016-11-02	23:49:00				1726	KAIT	2016-12-27 19:51:00	1.921	2016-12-28	08:51:00
1727	KAIT	2016-11-02 10:50:00	2.783	2016-11-02	23:50:00				1727	KAIT	2016-12-27 19:52:00	1.913	2016-12-28	08:52:00
1728	KAIT	2016-11-02 10:51:00	2.774	2016-11-02	23:51:00				1728	KAIT	2016-12-27 19:53:00	1.887	2016-12-28	08:53:00
1729	KAIT	2016-11-02 10:52:00	2.758	2016-11-02	23:52:00				1729	KAIT	2016-12-27 19:54:00	1.874	2016-12-28	08:54:00
1730	KAIT	2016-11-02 10:53:00	2.758	2016-11-02	23:53:00				1730	KAIT	2016-12-27 19:55:00	1.881	2016-12-28	08:55:00
1731	KAIT	2016-11-02 10:54:00	2.742	2016-11-02	23:54:00				1731	KAIT	2016-12-27 19:56:00	1.894	2016-12-28	08:56:00
1732	KAIT	2016-11-02 10:55:00	2.734	2016-11-02	23:55:00				1732	KAIT	2016-12-27 19:57:00	1.861	2016-12-28	08:57:00
1733	KAIT	2016-11-02 10:56:00	2.741	2016-11-02	23:56:00				1733	KAIT	2016-12-27 19:58:00	1.877	2016-12-28	08:58:00
1734	KAIT	2016-11-02 10:57:00	2.728	2016-11-02	23:57:00				1734	KAIT	2016-12-27 19:59:00	1.874	2016-12-28	08:59:00
1735	KAIT	2016-11-02 10:58:00	2.761	2016-11-02	23:58:00				1735	KAIT	2016-12-27 20:00:00	1.864	2016-12-28	09:00:00
1736	KAIT	2016-11-02 10:59:00	2.746	2016-11-02	23:59:00				1736	KAIT	2016-12-27 20:01:00	1.872	2016-12-28	09:01:00
1737	KAIT	2016-11-02 11:00:00	2.747	2016-11-03	1900-01-01				1737	KAIT	2016-12-27 20:02:00	1.862	2016-12-28	09:02:00
1738	KAIT	2016-11-02 11:01:00	2.714	2016-11-03	00:01:00				1738	KAIT	2016-12-27 20:03:00	1.86	2016-12-28	09:03:00
1739	KAIT	2016-11-02 11:02:00	2.737	2016-11-03	00:02:00				1739	KAIT	2016-12-27 20:04:00	1.854	2016-12-28	09:04:00
1740	KAIT	2016-11-02 11:03:00	2.721	2016-11-03	00:03:00				1740	KAIT	2016-12-27 20:05:00	1.854	2016-12-28	09:05:00
1741	KAIT	2016-11-02 11:04:00	2.701	2016-11-03	00:04:00				1741	KAIT	2016-12-27 20:06:00	1.869	2016-12-28	09:06:00
1742	KAIT	2016-11-02 11:05:00	2.694	2016-11-03	00:05:00				1742	KAIT	2016-12-27 20:07:00	1.861	2016-12-28	09:07:00
1743	KAIT	2016-11-02 11:06:00	2.709	2016-11-03	00:06:00				1743	KAIT	2016-12-27 20:08:00	1.847	2016-12-28	09:08:00
1744	KAIT	2016-11-02 11:07:00	2.701	2016-11-03	00:07:00				1744	KAIT	2016-12-27 20:09:00	1.837	2016-12-28	09:09:00
1745	KAIT	2016-11-02 11:08:00	2.701	2016-11-03	00:08:00				1745	KAIT	2016-12-27 20:10:00	1.803	2016-12-28	09:10:00
1746	KAIT	2016-11-02 11:09:00	2.697	2016-11-03	00:09:00				1746	KAIT	2016-12-27 20:11:00	1.803	2016-12-28	09:11:00
1747	KAIT	2016-11-02 11:10:00	2.701	2016-11-03	00:10:00				1747	KAIT	2016-12-27 20:12:00	1.8	2016-12-28	09:12:00
1748	KAIT	2016-11-02 11:11:00	2.71	2016-11-03	00:11:00				1748	KAIT	2016-12-27 20:13:00	1.805	2016-12-28	09:13:00
1749	KAIT	2016-11-02 11:12:00	2.696	2016-11-03	00:12:00				1749	KAIT	2016-12-27 20:14:00	1.796	2016-12-28	09:14:00
1750	KAIT	2016-11-02 11:13:00	2.704	2016-11-03	00:13:00				1750	KAIT	2016-12-27 20:15:00	1.797	2016-12-28	09:15:00
1751	KAIT	2016-11-02 11:14:00	2.689	2016-11-03	00:14:00				1751	KAIT	2016-12-27 20:16:00	1.788	2016-12-28	09:16:00
1752	KAIT	2016-11-02 11:15:00	2.673	2016-11-03	00:15:00				1752	KAIT	2016-12-27 20:17:00	1.772	2016-12-28	09:17:00
1753	KAIT	2016-11-02 11:16:00	2.673	2016-11-03	00:16:00				1753	KAIT	2016-12-27 20:18:00	1.769	2016-12-28	09:18:00
1754	KAIT	2016-11-02 11:17:00	2.668	2016-11-03	00:17:00				1754	KAIT	2016-12-27 20:19:00	1.778	2016-12-28	09:19:00
1755	KAIT	2016-11-02 11:18:00	2.677	2016-11-03	00:18:00				1755	KAIT	2016-12-27 20:20:00	1.756	2016-12-28	09:20:00
1756	KAIT	2016-11-02 11:19:00	2.683	2016-11-03	00:19:00				1756	KAIT	2016-12-27 20:21:00	1.772	2016-12-28	09:21:00
1757	KAIT	2016-11-02 11:20:00	2.638	2016-11-03	00:20:00				1757	KAIT	2016-12-27 20:22:00	1.761	2016-12-28	09:22:00
1758	KAIT	2016-11-02 11:21:00	2.674	2016-11-03	00:21:00				1758	KAIT	2016-12-27 20:23:00	1.788	2016-12-28	09:23:00
1759	KAIT	2016-11-02 11:22:00	2.67	2016-11-03	00:22:00				1759	KAIT	2016-12-27 20:24:00	1.797	2016-12-28	09:24:00
1760	KAIT	2016-11-02 11:23:00	2.645	2016-11-03	00:23:00				1760	KAIT	2016-12-27 20:25:00	1.786	2016-12-28	09:25:00
1761	KAIT	2016-11-02 11:24:00	2.641	2016-11-03	00:24:00				1761	KAIT	2016-12-27 20:26:00	1.765	2016-12-28	09:26:00
1762	KAIT	2016-11-02 11:25:00	2.66	2016-11-03	00:25:00				1762	KAIT	2016-12-27 20:27:00	1.762	2016-12-28	09:27:00
1763	KAIT	2016-11-02 11:26:00	2.643	2016-11-03	00:26:00				1763	KAIT	2016-12-27 20:28:00	1.746	2016-12-28	09:28:00
1764	KAIT	2016-11-02 11:27:00	2.647	2016-11-03	00:27:00				1764	KAIT	2016-12-27 20:29:00	1.759	2016-12-28	09:29:00
1765	KAIT	2016-11-02 11:28:00	2.653	2016-11-03	00:28:00				1765	KAIT	2016-12-27 20:30:00	1.744	2016-12-28	09:30:00
1766	KAIT	2016-11-02 11:29:00	2.652	2016-11-03	00:29:00				1766	KAIT	2016-12-27 20:31:00	1.736	2016-12-28	09:31:00
1767	KAIT	2016-11-02 11:30:00	2.637	2016-11-03	00:30:00				1767	KAIT	2016-12-27 20:32:00	1.735	2016-12-28	09:32:00
1768	KAIT	2016-11-02 11:31:00	2.636	2016-11-03	00:31:00				1768	KAIT	2016-12-27 20:33:00	1.735	2016-12-28	09:33:00
1769	KAIT	2016-11-02 11:32:00	2.631	2016-11-03	00:32:00				1769	KAIT	2016-12-27 20:34:00	1.722	2016-12-28	09:34:00
1770	KAIT	2016-11-02 11:33:00	2.63	2016-11-03	00:33:00				1770	KAIT	2016-12-27 20:35:00	1.734	2016-12-28	09:35:00
1771	KAIT	2016-11-02 11:34:00	2.636	2016-11-03	00:34:00				1771	KAIT	2016-12-27 20:36:00	1.711	2016-12-28	09:36:00
1772	KAIT	2016-11-02 11:35:00	2.627	2016-11-03	00:35:00				1772	KAIT	2016-12-27 20:37:00	1.708	2016-12-28	09:37:00
1773	KAIT	2016-11-02 11:36:00	2.629	2016-11-03	00:36:00				1773	KAIT	2016-12-27 20:38:00	1.725	2016-12-28	09:38:00
1774	KAIT	2016-11-02 11:37:00	2.637	2016-11-03	00:37:00				1774	KAIT	2016-12-27 20:39:00	1.736	2016-12-28	09:39:00
1775	KAIT	2016-11-02 11:38:00	2.624	2016-11-03	00:38:00				1775	KAIT	2016-12-27 20:40:00	1.713	2016-12-28	09:40:00
1776	KAIT	2016-11-02 11:39:00	2.594	2016-11-03	00:39:00				1776	KAIT	2016-12-27 20:41:00	1.722	2016-12-28	09:41:00
1777	KAIT	2016-11-02 11:40:00	2.615	2016-11-03	00:40:00				1777	KAIT	2016-12-27 20:42:00	1.711	2016-12-28	09:42:00
1778	KAIT	2016-11-02 11:41:00	2.61	2016-11-03	00:41:00				1778	KAIT	2016-12-27 20:43:00	1.704	2016-12-28	09:43:00
1779	KAIT	2016-11-02 11:42:00	2.603	2016-11-03	00:42:00				1779	KAIT	2016-12-27 20:44:00	1.677	2016-12-28	09:44:00
1780	KAIT	2016-11-02 11:43:00	2.585	2016-11-03	00:43:00				1780	KAIT	2016-12-27 20:45:00	1.678	2016-12-28	09:45:00
1781	KAIT	2016-11-02 11:44:00	2.6	2016-11-03	00:44:00				1781	KAIT	2016-12-27 20:46:00	1.673	2016-12-28	09:46:00
1782	KAIT	2016-11-02 11:45:00	2.586	2016-11-03	00:45:00				1782	KAIT	2016-12-27 20:47:00	1.655	2016-12-28	09:47:00
1783	KAIT	2016-11-02 11:46:00	2.577	2016-11-03	00:46:00				1783	KAIT	2016-12-27 20:48:00	1.657	2016-12-28	09:48:00
1784	KAIT	2016-11-02 11:47:00	2.58	2016-11-03	00:47:00				1784	KAIT	2016-12-27 20:49:00	1.674	2016-12-28	09:49:00
1785	KAIT	2016-11-02 11:48:00	2.591	2016-11-03	00:48:00				1785	KAIT	2016-12-27 20:50:00	1.687	2016-12-28	09:50:00
1786	KAIT	2016-11-02 11:49:00	2.594	2016-11-03	00:49:00				1786	KAIT	2016-12-27 20:51:00	1.678	2016-12-28	09:51:00
1787	KAIT	2016-11-02 11:50:00	2.601	2016-11-03	00:50:00				1787	KAIT	2016-12-27 20:52:00	1.669	2016-12-28	09:52:00
1788	KAIT	2016-11-02 11:51:00	2.59	2016-11-03	00:51:00				1788	KAIT	2016-12-27 20:53:00	1.648	2016-12-28	09:53:00
1789	KAIT	2016-11-02 11:52:00	2.59	2016-11-03	00:52:00				1789	KAIT	2016-12-27 20:54:00	1.669	2016-12-28	09:54:00
1790	KAIT	2016-11-02 11:53:00	2.596	2016-11-03	00:53:00				1790	KAIT	2016-12-27 20:55:00	1.68	2016-12-28	09:55:00
1791	KAIT	2016-11-02 11:54:00	2.573	2016-11-03	00:54:00				1791	KAIT	2016-12-27 20:56:00	1.69	2016-12-28	09:56:00
1792	KAIT	2016-11-02 11:55:00	2.58	2016-11-03	00:55:00				1792	KAIT	2016-12-27 20:57:00	1.671	2016-12-28	09:57:00
1793	KAIT	2016-11-02 11:56:00	2.57	2016-11-03	00:56:00				1793	KAIT	2016-12-27 20:58:00	1.662	2016-12-28	09:58:00
1794	KAIT	2016-11-02 11:57:00	2.578	2016-11-03	00:57:00				1794	KAIT	2016-12-27 20:59:00	1.654	2016-12-28	09:59:00
1795	KAIT	2016-11-02 11:58:00	2.546	2016-11-03	00:58:00				1795	KAIT	2016-12-27 21:00:00	1.627	2016-12-28	10:00:00
1796	KAIT	2016-11-02 11:59:00	2.579	2016-11-03	00:59:00				1796	KAIT	2016-12-27 21:01:00	1.612	2016-12-28	10:01:00
1797	KAIT	2016-11-02 12:00:00	2.566	2016-11-03	01:00:00				1797	KAIT	2016-12-27 21:02:00	1.593	2016-12-28	10:02:00
1798	KAIT	2016-11-02 12:01:00	2.563	2016-11-03	01:01:00				1798	KAIT	2016-12-27 21:03:00	1.607	2016-12-28	10:03:00
1799	KAIT	2016-11-02 12:02:00	2.546	2016-11-03	01:02:00				1799	KAIT	2016-12-27 21:04:00	1.598	2016-12-28	10:04:00
1800	KAIT	2016-11-02 12:03:00	2.531	2016-11-03	01:03:00				1800	KAIT	2016-12-27 21:05:00	1.618	2016-12-28	10:05:00
1801	KAIT	2016-11-02 12:04:00	2.548	2016-11-03	01:04:00				1801	KAIT	2016-12-27 21:06:00	1.615	2016-12-28	10:06:00
1802	KAIT	2016-11-02 12:05:00	2.548	2016-11-03	01:05:00				1802	KAIT	2016-12-27 21:07:00	1.603	2016-12-28	10:07:00
1803	KAIT	2016-11-02 12:06:00	2.541	2016-11-03	01:06:00				1803	KAIT	2016-12-27 21:08:00	1.6	2016-12-28	10:08:00
1804	KAIT	2016-11-02 12:07:00	2.545	2016-11-03	01:07:00				1804	KAIT	2016-12-27 21:09:00	1.604	2016-12-28	10:09:00
1805	KAIT	2016-11-02 12:08:00	2.543	2016-11-03	01:08:00				1805	KAIT	2016-12-27 21:10:00	1.601	2016-12-28	10:10:00
1806	KAIT	2016-11-02 12:09:00	2.541	2016-11-03	01:09:00				1806	KAIT	2016-12-27 21:11:00	1.593	2016-12-28	10:11:00
1807	KAIT	2016-11-02 12:10:00	2.526	2016-11-03	01:10:00				1807	KAIT	2016-12-27 21:12:00	1.61	2016-12-28	10:12:00
1808	KAIT	2016-11-02 12:11:00	2.543	2016-11-03	01:11:00				1808	KAIT	2016-12-27 21:13:00	1.603	2016-12-28	10:13:00
1809	KAIT	2016-11-02 12:12:00	2.531	2016-11-03	01:12:00				1809	KAIT	2016-12-27 21:14:00	1.62	2016-12-28	10:14:00
1810	KAIT	2016-11-02 12:13:00	2.543	2016-11-03	01:13:00				1810	KAIT	2016-12-27 21:15:00	1.61	2016-12-28	10:15:00
1811	KAIT	2016-11-02 12:14:00	2.549	2016-11-03	01:14:00				1811	KAIT	2016-12-27 21:16:00	1.616	2016-12-28	10:16:00
1812	KAIT	2016-11-02 12:15:00	2.555	2016-11-03	01:15:00				1812	KAIT	2016-12-27 21:17:00	1.619	2016-12-28	10:17:00
1813	KAIT	2016-11-02 12:16:00	2.532	2016-11-03	01:16:00				1813	KAIT	2016-12-27 21:18:00	1.634	2016-12-28	10:18:00
1814	KAIT	2016-11-02 12:17:00	2.537	2016-11-03	01:17:00				1814	KAIT	2016-12-27 21:19:00	1.621	2016-12-28	10:19:00
1815	KAIT	2016-11-02 12:18:00	2.56	2016-11-03	01:18:00				1815	KAIT	2016-12-27 21:20:00	1.623	2016-12-28	10:20:00
1816	KAIT	2016-11-02 12:19:00	2.549	2016-11-03	01:19:00				1816	KAIT	2016-12-27 21:21:00	1.617	2016-12-28	10:21:00
1817	KAIT	2016-11-02 12:20:00	2.554	2016-11-03	01:20:00				1817	KAIT	2016-12-27 21:22:00	1.601	2016-12-28	10:22:00
1818	KAIT	2016-11-02 12:21:00	2.567	2016-11-03	01:21:00				1818	KAIT	2016-12-27 21:23:00	1.583	2016-12-28	10:23:00
1819	KAIT	2016-11-02 12:22:00	2.537	2016-11-03	01:22:00				1819	KAIT	2016-12-27 21:24:00	1.601	2016-12-28	10:24:00
1820	KAIT	2016-11-02 12:23:00	2.548	2016-11-03	01:23:00				1820	KAIT	2016-12-27 21:25:00	1.573	2016-12-28	10:25:00
1821	KAIT	2016-11-02 12:24:00	2.537	2016-11-03	01:24:00				1821	KAIT	2016-12-27 21:26:00	1.562	2016-12-28	10:26:00
1822	KAIT	2016-11-02 12:25:00	2.536	2016-11-03	01:25:00				1822	KAIT	2016-12-27 21:27:00	1.564	2016-12-28	10:27:00
1823	KAIT	2016-11-02 12:26:00	2.559	2016-11-03	01:26:00				1823	KAIT	2016-12-27 21:28:00	1.584	2016-12-28	10:28:00
1824	KAIT	2016-11-02 12:27:00	2.549	2016-11-03	01:27:00				1824	KAIT	2016-12-27 21:29:00	1.563	2016-12-28	10:29:00
1825	KAIT	2016-11-02 12:28:00	2.545	2016-11-03	01:28:00				1825	KAIT	2016-12-27 21:30:00	1.555	2016-12-28	10:30:00
1826	KAIT	2016-11-02 12:29:00	2.532	2016-11-03	01:29:00				1826	KAIT	2016-12-27 21:31:00	1.564	2016-12-28	10:31:00
1827	KAIT	2016-11-02 12:30:00	2.553	2016-11-03	01:30:00				1827	KAIT	2016-12-27 21:32:00	1.56	2016-12-28	10:32:00
1828	KAIT	2016-11-02 12:31:00	2.516	2016-11-03	01:31:00				1828	KAIT	2016-12-27 21:33:00	1.574	2016-12-28	10:33:00
1829	KAIT	2016-11-02 12:32:00	2.514	2016-11-03	01:32:00				1829	KAIT	2016-12-27 21:34:00	1.545	2016-12-28	10:34:00
1830	KAIT	2016-11-02 12:33:00	2.507	2016-11-03	01:33:00				1830	KAIT	2016-12-27 21:35:00	1.546	2016-12-28	10:35:00
1831	KAIT	2016-11-02 12:34:00	2.501	2016-11-03	01:34:00				1831	KAIT	2016-12-27 21:36:00	1.534	2016-12-28	10:36:00
1832	KAIT	2016-11-02 12:35:00	2.503	2016-11-03	01:35:00				1832	KAIT	2016-12-27 21:37:00	1.542	2016-12-28	10:37:00
1833	KAIT	2016-11-02 12:36:00	2.488	2016-11-03	01:36:00				1833	KAIT	2016-12-27 21:38:00	1.537	2016-12-28	10:38:00
1834	KAIT	2016-11-02 12:37:00	2.496	2016-11-03	01:37:00				1834	KAIT	2016-12-27 21:39:00	1.543	2016-12-28	10:39:00
1835	KAIT	2016-11-02 12:38:00	2.482	2016-11-03	01:38:00				1835	KAIT	2016-12-27 21:40:00	1.532	2016-12-28	10:40:00
1836	KAIT	2016-11-02 12:39:00	2.495	2016-11-03	01:39:00				1836	KAIT	2016-12-27 21:41:00	1.546	2016-12-28	10:41:00
1837	KAIT	2016-11-02 12:40:00	2.509	2016-11-03	01:40:00				1837	KAIT	2016-12-27 21:42:00	1.544	2016-12-28	10:42:00
1838	KAIT	2016-11-02 12:41:00	2.513	2016-11-03	01:41:00				1838	KAIT	2016-12-27 21:43:00	1.548	2016-12-28	10:43:00
1839	KAIT	2016-11-02 12:42:00	2.503	2016-11-03	01:42:00				1839	KAIT	2016-12-27 21:44:00	1.549	2016-12-28	10:44:00
1840	KAIT	2016-11-02 12:43:00	2.473	2016-11-03	01:43:00				1840	KAIT	2016-12-27 21:45:00	1.542	2016-12-28	10:45:00
1841	KAIT	2016-11-02 12:44:00	2.5	2016-11-03	01:44:00				1841	KAIT	2016-12-27 21:46:00	1.555	2016-12-28	10:46:00
1842	KAIT	2016-11-02 12:45:00	2.491	2016-11-03	01:45:00				1842	KAIT	2016-12-27 21:47:00	1.545	2016-12-28	10:47:00
1843	KAIT	2016-11-02 12:46:00	2.506	2016-11-03	01:46:00				1843	KAIT	2016-12-27 21:48:00	1.55	2016-12-28	10:48:00
1844	KAIT	2016-11-02 12:47:00	2.511	2016-11-03	01:47:00				1844	KAIT	2016-12-27 21:49:00	1.56	2016-12-28	10:49:00
1845	KAIT	2016-11-02 12:48:00	2.534	2016-11-03	01:48:00				1845	KAIT	2016-12-27 21:50:00	1.54	2016-12-28	10:50:00
1846	KAIT	2016-11-02 12:49:00	2.518	2016-11-03	01:49:00				1846	KAIT	2016-12-27 21:51:00	1.555	2016-12-28	10:51:00
1847	KAIT	2016-11-02 12:50:00	2.527	2016-11-03	01:50:00				1847	KAIT	2016-12-27 21:52:00	1.564	2016-12-28	10:52:00
1848	KAIT	2016-11-02 12:51:00	2.53	2016-11-03	01:51:00				1848	KAIT	2016-12-27 21:53:00	1.547	2016-12-28	10:53:00
1849	KAIT	2016-11-02 12:52:00	2.531	2016-11-03	01:52:00				1849	KAIT	2016-12-27 21:54:00	1.533	2016-12-28	10:54:00
1850	KAIT	2016-11-02 12:53:00	2.517	2016-11-03	01:53:00				1850	KAIT	2016-12-27 21:55:00	1.522	2016-12-28	10:55:00
1851	KAIT	2016-11-02 12:54:00	2.531	2016-11-03	01:54:00				1851	KAIT	2016-12-27 21:56:00	1.537	2016-12-28	10:56:00
1852	KAIT	2016-11-02 12:55:00	2.527	2016-11-03	01:55:00				1852	KAIT	2016-12-27 21:57:00	1.513	2016-12-28	10:57:00
1853	KAIT	2016-11-02 12:56:00	2.523	2016-11-03	01:56:00	LT 0.5			1853	KAIT	2016-12-27 21:58:00	1.536	2016-12-28	10:58:00
1854	KAIT	2016-11-02 12:57:00	2.522	2016-11-03	01:57:00				1854	KAIT	2016-12-27 21:59:00	1.505	2016-12-28	10:59:00
1855	KAIT	2016-11-02 12:58:00	2.526	2016-11-03	01:58:00				1855	KAIT	2016-12-27 22:00:00	1.517	2016-12-28	11:00:00
1856	KAIT	2016-11-02 12:59:00	2.531	2016-11-03	01:59:00				1856	KAIT	2016-12-27 22:01:00	1.508	2016-12-28	11:01:00
1857	KAIT	2016-11-02 13:00:00	2.534	2016-11-03	02:00:00				1857	KAIT	2016-12-27 22:02:00	1.511	2016-12-28	11:02:00
1858	KAIT	2016-11-02 13:01:00	2.535	2016-11-03	02:01:00				1858	KAIT	2016-12-27 22:03:00	1.516	2016-12-28	11:03:00
1859	KAIT	2016-11-02 13:02:00	2.536	2016-11-03	02:02:00				1859	KAIT	2016-12-27 22:04:00	1.521	2016-12-28	11:04:00
1860	KAIT	2016-11-02 13:03:00	2.525	2016-11-03	02:03:00				1860	KAIT	2016-12-27 22:05:00	1.528	2016-12-28	11:05:00
1861	KAIT	2016-11-02 13:04:00	2.536	2016-11-03	02:04:00				1861	KAIT	2016-12-27 22:06:00	1.514	2016-12-28	11:06:00
1862	KAIT	2016-11-02 13:05:00	2.526	2016-11-03	02:05:00				1862	KAIT	2016-12-27 22:07:00	1.521	2016-12-28	11:07:00
1863	KAIT	2016-11-02 13:06:00	2.508	2016-11-03	02:06:00				1863	KAIT	2016-12-27 22:08:00	1.559	2016-12-28	11:08:00
1864	KAIT	2016-11-02 13:07:00	2.527	2016-11-03	02:07:00				1864	KAIT	2016-12-27 22:09:00	1.562	2016-12-28	11:09:00
1865	KAIT	2016-11-02 13:08:00	2.505	2016-11-03	02:08:00				1865	KAIT	2016-12-27 22:10:00	1.54	2016-12-28	11:10:00
1866	KAIT	2016-11-02 13:09:00	2.504	2016-11-03	02:09:00				1866	KAIT	2016-12-27 22:11:00	1.529	2016-12-28	11:11:00
1867	KAIT	2016-11-02 13:10:00	2.503	2016-11-03	02:10:00				1867	KAIT	2016-12-27 22:12:00	1.522	2016-12-28	11:12:00
1868	KAIT	2016-11-02 13:11:00	2.518	2016-11-03	02:11:00				1868	KAIT	2016-12-27 22:13:00	1.523	2016-12-28	11:13:00
1869	KAIT	2016-11-02 13:12:00	2.483	2016-11-03	02:12:00				1869	KAIT	2016-12-27 22:14:00	1.497	2016-12-28	11:14:00
1870	KAIT	2016-11-02 13:13:00	2.511	2016-11-03	02:13:00				1870	KAIT	2016-12-27 22:15:00	1.518	2016-12-28	11:15:00
1871	KAIT	2016-11-02 13:14:00	2.511	2016-11-03	02:14:00				1871	KAIT	2016-12-27 22:16:00	1.505	2016-12-28	11:16:00
1872	KAIT	2016-11-02 13:15:00	2.516	2016-11-03	02:15:00				1872	KAIT	2016-12-27 22:17:00	1.516	2016-12-28	11:17:00
1873	KAIT	2016-11-02 13:16:00	2.513	2016-11-03	02:16:00				1873	KAIT	2016-12-27 22:18:00	1.522	2016-12-28	11:18:00
1874	KAIT	2016-11-02 13:17:00	2.508	2016-11-03	02:17:00				1874	KAIT	2016-12-27 22:19:00	1.519	2016-12-28	11:19:00
1875	KAIT	2016-11-02 13:18:00	2.526	2016-11-03	02:18:00				1875	KAIT	2016-12-27 22:20:00	1.505	2016-12-28	11:20:00
1876	KAIT	2016-11-02 13:19:00	2.523	2016-11-03	02:19:00				1876	KAIT	2016-12-27 22:21:00	1.529	2016-12-28	11:21:00
1877	KAIT	2016-11-02 13:20:00	2.544	2016-11-03	02:20:00				1877	KAIT	2016-12-27 22:22:00	1.519	2016-12-28	11:22:00
1878	KAIT	2016-11-02 13:21:00	2.548	2016-11-03	02:21:00				1878	KAIT	2016-12-27 22:23:00	1.507	2016-12-28	11:23:00
1879	KAIT	2016-11-02 13:22:00	2.531	2016-11-03	02:22:00				1879	KAIT	2016-12-27 22:24:00	1.498	2016-12-28	11:24:00
1880	KAIT	2016-11-02 13:23:00	2.541	2016-11-03	02:23:00				1880	KAIT	2016-12-27 22:25:00	1.514	2016-12-28	11:25:00
1881	KAIT	2016-11-02 13:24:00	2.546	2016-11-03	02:24:00				1881	KAIT	2016-12-27 22:26:00	1.536	2016-12-28	11:26:00
1882	KAIT	2016-11-02 13:25:00	2.531	2016-11-03	02:25:00				1882	KAIT	2016-12-27 22:27:00	1.513	2016-12-28	11:27:00
1883	KAIT	2016-11-02 13:26:00	2.551	2016-11-03	02:26:00				1883	KAIT	2016-12-27 22:28:00	1.493	2016-12-28	11:28:00
1884	KAIT	2016-11-02 13:27:00	2.556	2016-11-03	02:27:00				1884	KAIT	2016-12-27 22:29:00	1.513	2016-12-28	11:29:00
1885	KAIT	2016-11-02 13:28:00	2.544	2016-11-03	02:28:00				1885	KAIT	2016-12-27 22:30:00	1.525	2016-12-28	11:30:00
1886	KAIT	2016-11-02 13:29:00	2.566	2016-11-03	02:29:00				1886	KAIT	2016-12-27 22:31:00	1.531	2016-12-28	11:31:00
1887	KAIT	2016-11-02 13:30:00	2.55	2016-11-03	02:30:00				1887	KAIT	2016-12-27 22:32:00	1.515	2016-12-28	11:32:00
1888	KAIT	2016-11-02 13:31:00	2.551	2016-11-03	02:31:00				1888	KAIT	2016-12-27 22:33:00	1.521	2016-12-28	11:33:00
1889	KAIT	2016-11-02 13:32:00	2.551	2016-11-03	02:32:00				1889	KAIT	2016-12-27 22:34:00	1.537	2016-12-28	11:34:00
1890	KAIT	2016-11-02 13:33:00	2.563	2016-11-03	02:33:00				1890	KAIT	2016-12-27 22:35:00	1.531	2016-12-28	11:35:00
1891	KAIT	2016-11-02 13:34:00	2.568	2016-11-03	02:34:00				1891	KAIT	2016-12-27 22:36:00	1.538	2016-12-28	11:36:00
1892	KAIT	2016-11-02 13:35:00	2.563	2016-11-03	02:35:00				1892	KAIT	2016-12-27 22:37:00	1.534	2016-12-28	11:37:00
1893	KAIT	2016-11-02 13:36:00	2.586	2016-11-03	02:36:00				1893	KAIT	2016-12-27 22:38:00	1.537	2016-12-28	11:38:00
1894	KAIT	2016-11-02 13:37:00	2.568	2016-11-03	02:37:00				1894	KAIT	2016-12-27 22:39:00	1.531	2016-12-28	11:39:00
1895	KAIT	2016-11-02 13:38:00	2.564	2016-11-03	02:38:00				1895	KAIT	2016-12-27 22:40:00	1.55	2016-12-28	11:40:00
1896	KAIT	2016-11-02 13:39:00	2.564	2016-11-03	02:39:00				1896	KAIT	2016-12-27 22:41:00	1.539	2016-12-28	11:41:00
1897	KAIT	2016-11-02 13:40:00	2.557	2016-11-03	02:40:00				1897	KAIT	2016-12-27 22:42:00	1.55	2016-12-28	11:42:00
1898	KAIT	2016-11-02 13:41:00	2.554	2016-11-03	02:41:00				1898	KAIT	2016-12-27 22:43:00	1.544	2016-12-28	11:43:00
1899	KAIT	2016-11-02 13:42:00	2.568	2016-11-03	02:42:00				1899	KAIT	2016-12-27 22:44:00	1.55	2016-12-28	11:44:00
1900	KAIT	2016-11-02 13:43:00	2.578	2016-11-03	02:43:00				1900	KAIT	2016-12-27 22:45:00	1.541	2016-12-28	11:45:00
1901	KAIT	2016-11-02 13:44:00	2.571	2016-11-03	02:44:00				1901	KAIT	2016-12-27 22:46:00	1.533	2016-12-28	11:46:00
1902	KAIT	2016-11-02 13:45:00	2.579	2016-11-03	02:45:00				1902	KAIT	2016-12-27 22:47:00	1.542	2016-12-28	11:47:00
1903	KAIT	2016-11-02 13:46:00	2.584	2016-11-03	02:46:00				1903	KAIT	2016-12-27 22:48:00	1.547	2016-12-28	11:48:00
1904	KAIT	2016-11-02 13:47:00	2.59	2016-11-03	02:47:00				1904	KAIT	2016-12-27 22:49:00	1.537	2016-12-28	11:49:00
1905	KAIT	2016-11-02 13:48:00	2.583	2016-11-03	02:48:00				1905	KAIT	2016-12-27 22:50:00	1.528	2016-12-28	11:50:00
1906	KAIT	2016-11-02 13:49:00	2.592	2016-11-03	02:49:00				1906	KAIT	2016-12-27 22:51:00	1.501	2016-12-28	11:51:00
1907	KAIT	2016-11-02 13:50:00	2.589	2016-11-03	02:50:00				1907	KAIT	2016-12-27 22:52:00	1.522	2016-12-28	11:52:00
1908	KAIT	2016-11-02 13:51:00	2.606	2016-11-03	02:51:00				1908	KAIT	2016-12-27 22:53:00	1.523	2016-12-28	11:53:00
1909	KAIT	2016-11-02 13:52:00	2.589	2016-11-03	02:52:00				1909	KAIT	2016-12-27 22:54:00	1.54	2016-12-28	11:54:00
1910	KAIT	2016-11-02 13:53:00	2.598	2016-11-03	02:53:00				1910	KAIT	2016-12-27 22:55:00	1.517	2016-12-28	11:55:00
1911	KAIT	2016-11-02 13:54:00	2.603	2016-11-03	02:54:00				1911	KAIT	2016-12-27 22:56:00	1.52	2016-12-28	11:56:00
1912	KAIT	2016-11-02 13:55:00	2.596	2016-11-03	02:55:00				1912	KAIT	2016-12-27 22:57:00	1.55	2016-12-28	11:57:00
1913	KAIT	2016-11-02 13:56:00	2.61	2016-11-03	02:56:00				1913	KAIT	2016-12-27 22:58:00	1.531	2016-12-28	11:58:00
1914	KAIT	2016-11-02 13:57:00	2.586	2016-11-03	02:57:00				1914	KAIT	2016-12-27 22:59:00	1.529	2016-12-28	11:59:00
1915	KAIT	2016-11-02 13:58:00	2.598	2016-11-03	02:58:00				1915	KAIT	2016-12-27 23:00:00	1.515	2016-12-28	12:00:00
1916	KAIT	2016-11-02 13:59:00	2.598	2016-11-03	02:59:00				1916	KAIT	2016-12-27 23:01:00	1.522	2016-12-28	12:01:00
1917	KAIT	2016-11-02 14:00:00	2.596	2016-11-03	03:00:00				1917	KAIT	2016-12-27 23:02:00	1.528	2016-12-28	12:02:00
1918	KAIT	2016-11-02 14:01:00	2.606	2016-11-03	03:01:00				1918	KAIT	2016-12-27 23:03:00	1.525	2016-12-28	12:03:00
1919	KAIT	2016-11-02 14:02:00	2.62	2016-11-03	03:02:00				1919	KAIT	2016-12-27 23:04:00	1.532	2016-12-28	12:04:00
1920	KAIT	2016-11-02 14:03:00	2.628	2016-11-03	03:03:00				1920	KAIT	2016-12-27 23:05:00	1.539	2016-12-28	12:05:00
1921	KAIT	2016-11-02 14:04:00	2.613	2016-11-03	03:04:00				1921	KAIT	2016-12-27 23:06:00	1.544	2016-12-28	12:06:00
1922	KAIT	2016-11-02 14:05:00	2.62	2016-11-03	03:05:00				1922	KAIT	2016-12-27 23:07:00	1.534	2016-12-28	12:07:00
1923	KAIT	2016-11-02 14:06:00	2.609	2016-11-03	03:06:00				1923	KAIT	2016-12-27 23:08:00	1.552	2016-12-28	12:08:00
1924	KAIT	2016-11-02 14:07:00	2.613	2016-11-03	03:07:00				1924	KAIT	2016-12-27 23:09:00	1.532	2016-12-28	12:09:00
1925	KAIT	2016-11-02 14:08:00	2.613	2016-11-03	03:08:00				1925	KAIT	2016-12-27 23:10:00	1.569	2016-12-28	12:10:00
1926	KAIT	2016-11-02 14:09:00	2.631	2016-11-03	03:09:00				1926	KAIT	2016-12-27 23:11:00	1.559	2016-12-28	12:11:00
1927	KAIT	2016-11-02 14:10:00	2.653	2016-11-03	03:10:00				1927	KAIT	2016-12-27 23:12:00	1.577	2016-12-28	12:12:00
1928	KAIT	2016-11-02 14:11:00	2.651	2016-11-03	03:11:00				1928	KAIT	2016-12-27 23:13:00	1.587	2016-12-28	12:13:00
1929	KAIT	2016-11-02 14:12:00	2.654	2016-11-03	03:12:00				1929	KAIT	2016-12-27 23:14:00	1.598	2016-12-28	12:14:00
1930	KAIT	2016-11-02 14:13:00	2.652	2016-11-03	03:13:00				1930	KAIT	2016-12-27 23:15:00	1.614	2016-12-28	12:15:00
1931	KAIT	2016-11-02 14:14:00	2.647	2016-11-03	03:14:00				1931	KAIT	2016-12-27 23:16:00	1.612	2016-12-28	12:16:00
1932	KAIT	2016-11-02 14:15:00	2.672	2016-11-03	03:15:00				1932	KAIT	2016-12-27 23:17:00	1.601	2016-12-28	12:17:00
1933	KAIT	2016-11-02 14:16:00	2.664	2016-11-03	03:16:00				1933	KAIT	2016-12-27 23:18:00	1.603	2016-12-28	12:18:00
1934	KAIT	2016-11-02 14:17:00	2.69	2016-11-03	03:17:00				1934	KAIT	2016-12-27 23:19:00	1.601	2016-12-28	12:19:00
1935	KAIT	2016-11-02 14:18:00	2.676	2016-11-03	03:18:00				1935	KAIT	2016-12-27 23:20:00	1.599	2016-12-28	12:20:00
1936	KAIT	2016-11-02 14:19:00	2.668	2016-11-03	03:19:00				1936	KAIT	2016-12-27 23:21:00	1.592	2016-12-28	12:21:00
1937	KAIT	2016-11-02 14:20:00	2.681	2016-11-03	03:20:00				1937	KAIT	2016-12-27 23:22:00	1.598	2016-12-28	12:22:00
1938	KAIT	2016-11-02 14:21:00	2.693	2016-11-03	03:21:00				1938	KAIT	2016-12-27 23:23:00	1.608	2016-12-28	12:23:00
1939	KAIT	2016-11-02 14:22:00	2.702	2016-11-03	03:22:00				1939	KAIT	2016-12-27 23:24:00	1.606	2016-12-28	12:24:00
1940	KAIT	2016-11-02 14:23:00	2.692	2016-11-03	03:23:00				1940	KAIT	2016-12-27 23:25:00	1.629	2016-12-28	12:25:00
1941	KAIT	2016-11-02 14:24:00	2.702	2016-11-03	03:24:00				1941	KAIT	2016-12-27 23:26:00	1.608	2016-12-28	12:26:00
1942	KAIT	2016-11-02 14:25:00	2.716	2016-11-03	03:25:00				1942	KAIT	2016-12-27 23:27:00	1.611	2016-12-28	12:27:00
1943	KAIT	2016-11-02 14:26:00	2.722	2016-11-03	03:26:00				1943	KAIT	2016-12-27 23:28:00	1.617	2016-12-28	12:28:00
1944	KAIT	2016-11-02 14:27:00	2.714	2016-11-03	03:27:00				1944	KAIT	2016-12-27 23:29:00	1.604	2016-12-28	12:29:00
1945	KAIT	2016-11-02 14:28:00	2.702	2016-11-03	03:28:00				1945	KAIT	2016-12-27 23:30:00	1.602	2016-12-28	12:30:00
1946	KAIT	2016-11-02 14:29:00	2.709	2016-11-03	03:29:00				1946	KAIT	2016-12-27 23:31:00	1.595	2016-12-28	12:31:00
1947	KAIT	2016-11-02 14:30:00	2.697	2016-11-03	03:30:00				1947	KAIT	2016-12-27 23:32:00	1.606	2016-12-28	12:32:00
1948	KAIT	2016-11-02 14:31:00	2.705	2016-11-03	03:31:00				1948	KAIT	2016-12-27 23:33:00	1.599	2016-12-28	12:33:00
1949	KAIT	2016-11-02 14:32:00	2.721	2016-11-03	03:32:00				1949	KAIT	2016-12-27 23:34:00	1.6	2016-12-28	12:34:00
1950	KAIT	2016-11-02 14:33:00	2.715	2016-11-03	03:33:00				1950	KAIT	2016-12-27 23:35:00	1.604	2016-12-28	12:35:00
1951	KAIT	2016-11-02 14:34:00	2.722	2016-11-03	03:34:00				1951	KAIT	2016-12-27 23:36:00	1.634	2016-12-28	12:36:00
1952	KAIT	2016-11-02 14:35:00	2.722	2016-11-03	03:35:00				1952	KAIT	2016-12-27 23:37:00	1.638	2016-12-28	12:37:00
1953	KAIT	2016-11-02 14:36:00	2.727	2016-11-03	03:36:00				1953	KAIT	2016-12-27 23:38:00	1.649	2016-12-28	12:38:00
1954	KAIT	2016-11-02 14:37:00	2.712	2016-11-03	03:37:00				1954	KAIT	2016-12-27 23:39:00	1.626	2016-12-28	12:39:00
1955	KAIT	2016-11-02 14:38:00	2.726	2016-11-03	03:38:00				1955	KAIT	2016-12-27 23:40:00	1.647	2016-12-28	12:40:00
1956	KAIT	2016-11-02 14:39:00	2.721	2016-11-03	03:39:00				1956	KAIT	2016-12-27 23:41:00	1.656	2016-12-28	12:41:00
1957	KAIT	2016-11-02 14:40:00	2.741	2016-11-03	03:40:00				1957	KAIT	2016-12-27 23:42:00	1.656	2016-12-28	12:42:00
1958	KAIT	2016-11-02 14:41:00	2.746	2016-11-03	03:41:00				1958	KAIT	2016-12-27 23:43:00	1.644	2016-12-28	12:43:00
1959	KAIT	2016-11-02 14:42:00	2.771	2016-11-03	03:42:00				1959	KAIT	2016-12-27 23:44:00	1.659	2016-12-28	12:44:00
1960	KAIT	2016-11-02 14:43:00	2.759	2016-11-03	03:43:00				1960	KAIT	2016-12-27 23:45:00	1.65	2016-12-28	12:45:00
1961	KAIT	2016-11-02 14:44:00	2.787	2016-11-03	03:44:00				1961	KAIT	2016-12-27 23:46:00	1.671	2016-12-28	12:46:00
1962	KAIT	2016-11-02 14:45:00	2.782	2016-11-03	03:45:00				1962	KAIT	2016-12-27 23:47:00	1.685	2016-12-28	12:47:00
1963	KAIT	2016-11-02 14:46:00	2.79	2016-11-03	03:46:00				1963	KAIT	2016-12-27 23:48:00	1.691	2016-12-28	12:48:00
1964	KAIT	2016-11-02 14:47:00	2.769	2016-11-03	03:47:00				1964	KAIT	2016-12-27 23:49:00	1.673	2016-12-28	12:49:00
1965	KAIT	2016-11-02 14:48:00	2.787	2016-11-03	03:48:00				1965	KAIT	2016-12-27 23:50:00	1.675	2016-12-28	12:50:00
1966	KAIT	2016-11-02 14:49:00	2.807	2016-11-03	03:49:00				1966	KAIT	2016-12-27 23:51:00	1.672	2016-12-28	12:51:00
1967	KAIT	2016-11-02 14:50:00	2.813	2016-11-03	03:50:00				1967	KAIT	2016-12-27 23:52:00	1.657	2016-12-28	12:52:00
1968	KAIT	2016-11-02 14:51:00	2.801	2016-11-03	03:51:00				1968	KAIT	2016-12-27 23:53:00	1.665	2016-12-28	12:53:00
1969	KAIT	2016-11-02 14:52:00	2.809	2016-11-03	03:52:00				1969	KAIT	2016-12-27 23:54:00	1.66	2016-12-28	12:54:00
1970	KAIT	2016-11-02 14:53:00	2.818	2016-11-03	03:53:00				1970	KAIT	2016-12-27 23:55:00	1.654	2016-12-28	12:55:00
1971	KAIT	2016-11-02 14:54:00	2.826	2016-11-03	03:54:00				1971	KAIT	2016-12-27 23:56:00	1.66	2016-12-28	12:56:00
1972	KAIT	2016-11-02 14:55:00	2.828	2016-11-03	03:55:00				1972	KAIT	2016-12-27 23:57:00	1.67	2016-12-28	12:57:00
1973	KAIT	2016-11-02 14:56:00	2.829	2016-11-03	03:56:00				1973	KAIT	2016-12-27 23:58:00	1.688	2016-12-28	12:58:00
1974	KAIT	2016-11-02 14:57:00	2.821	2016-11-03	03:57:00				1974	KAIT	2016-12-27 23:59:00	1.691	2016-12-28	12:59:00
1975	KAIT	2016-11-02 14:58:00	2.831	2016-11-03	03:58:00				1975	KAIT	2016-12-28	1.701	2016-12-28	13:00:00
1976	KAIT	2016-11-02 14:59:00	2.834	2016-11-03	03:59:00				1976	KAIT	2016-12-28 00:01:00	1.702	2016-12-28	13:01:00
1977	KAIT	2016-11-02 15:00:00	2.85	2016-11-03	04:00:00				1977	KAIT	2016-12-28 00:02:00	1.72	2016-12-28	13:02:00
1978	KAIT	2016-11-02 15:01:00	2.841	2016-11-03	04:01:00				1978	KAIT	2016-12-28 00:03:00	1.71	2016-12-28	13:03:00
1979	KAIT	2016-11-02 15:02:00	2.859	2016-11-03	04:02:00				1979	KAIT	2016-12-28 00:04:00	1.733	2016-12-28	13:04:00
1980	KAIT	2016-11-02 15:03:00	2.855	2016-11-03	04:03:00				1980	KAIT	2016-12-28 00:05:00	1.722	2016-12-28	13:05:00
1981	KAIT	2016-11-02 15:04:00	2.85	2016-11-03	04:04:00				1981	KAIT	2016-12-28 00:06:00	1.736	2016-12-28	13:06:00
1982	KAIT	2016-11-02 15:05:00	2.858	2016-11-03	04:05:00				1982	KAIT	2016-12-28 00:07:00	1.729	2016-12-28	13:07:00
1983	KAIT	2016-11-02 15:06:00	2.859	2016-11-03	04:06:00				1983	KAIT	2016-12-28 00:08:00	1.739	2016-12-28	13:08:00
1984	KAIT	2016-11-02 15:07:00	2.842	2016-11-03	04:07:00				1984	KAIT	2016-12-28 00:09:00	1.754	2016-12-28	13:09:00
1985	KAIT	2016-11-02 15:08:00	2.864	2016-11-03	04:08:00				1985	KAIT	2016-12-28 00:10:00	1.743	2016-12-28	13:10:00
1986	KAIT	2016-11-02 15:09:00	2.845	2016-11-03	04:09:00				1986	KAIT	2016-12-28 00:11:00	1.732	2016-12-28	13:11:00
1987	KAIT	2016-11-02 15:10:00	2.872	2016-11-03	04:10:00				1987	KAIT	2016-12-28 00:12:00	1.75	2016-12-28	13:12:00
1988	KAIT	2016-11-02 15:11:00	2.877	2016-11-03	04:11:00				1988	KAIT	2016-12-28 00:13:00	1.734	2016-12-28	13:13:00
1989	KAIT	2016-11-02 15:12:00	2.87	2016-11-03	04:12:00				1989	KAIT	2016-12-28 00:14:00	1.753	2016-12-28	13:14:00
1990	KAIT	2016-11-02 15:13:00	2.871	2016-11-03	04:13:00				1990	KAIT	2016-12-28 00:15:00	1.761	2016-12-28	13:15:00
1991	KAIT	2016-11-02 15:14:00	2.888	2016-11-03	04:14:00				1991	KAIT	2016-12-28 00:16:00	1.783	2016-12-28	13:16:00
1992	KAIT	2016-11-02 15:15:00	2.905	2016-11-03	04:15:00				1992	KAIT	2016-12-28 00:17:00	1.782	2016-12-28	13:17:00
1993	KAIT	2016-11-02 15:16:00	2.907	2016-11-03	04:16:00				1993	KAIT	2016-12-28 00:18:00	1.778	2016-12-28	13:18:00
1994	KAIT	2016-11-02 15:17:00	2.915	2016-11-03	04:17:00				1994	KAIT	2016-12-28 00:19:00	1.775	2016-12-28	13:19:00
1995	KAIT	2016-11-02 15:18:00	2.913	2016-11-03	04:18:00				1995	KAIT	2016-12-28 00:20:00	1.795	2016-12-28	13:20:00
1996	KAIT	2016-11-02 15:19:00	2.927	2016-11-03	04:19:00				1996	KAIT	2016-12-28 00:21:00	1.779	2016-12-28	13:21:00
1997	KAIT	2016-11-02 15:20:00	2.947	2016-11-03	04:20:00				1997	KAIT	2016-12-28 00:22:00	1.781	2016-12-28	13:22:00
1998	KAIT	2016-11-02 15:21:00	2.934	2016-11-03	04:21:00				1998	KAIT	2016-12-28 00:23:00	1.778	2016-12-28	13:23:00
[truncated: 15,570 more rows]

## Sheet: Method B
Tide Gauge	UTC date/time	Elevation_m	NZ_Date	NZ_Time	Tide table LT/HT & values	Post-EQ adjusted values		MetService tide data			DIFFERENCE BETWEEN HIGH AND LOW TIDE ELEVATIONS PRE- AND POST-EQ
KAIT	2016-11-11 13:02:00	3.769	2016-11-12	02:02:00								Date_NZ	Time	Tide	Ave	SD	Difference
KAIT	2016-11-11 13:03:00	3.763	2016-11-12	02:03:00							Pre-EQ	2016-11-12	02:48:00	HT	3.82447	0.023775
KAIT	2016-11-11 13:04:00	3.773	2016-11-12	02:04:00								2016-11-12	09:01:00	LT	2.42984	0.0192266
KAIT	2016-11-11 13:05:00	3.776	2016-11-12	02:05:00								2016-11-12	15:09:00	HT	3.85394	0.0252192	0.89273
KAIT	2016-11-11 13:06:00	3.781	2016-11-12	02:06:00								2016-11-12	21:23:00	LT	2.34512	0.0240075	1.05518
KAIT	2016-11-11 13:07:00	3.77	2016-11-12	02:07:00								2016-11-13	03:40:00	HT	3.85606	0.0215298	0.805944
KAIT	2016-11-11 13:08:00	3.783	2016-11-12	02:08:00								2016-11-13	09:55:00	LT	2.29238	0.0184831	1.02309
KAIT	2016-11-11 13:09:00	3.785	2016-11-12	02:09:00								2016-11-13	16:13:00	HT	3.84902	0.0219529	0.971494
KAIT	2016-11-11 13:10:00	3.78	2016-11-12	02:10:00								2016-11-13	22:23:00	LT	3.84902	0.0219529	2.62314
KAIT	2016-11-11 13:11:00	3.785	2016-11-12	02:11:00							Post-EQ			HT	N/A	N/A
KAIT	2016-11-11 13:12:00	3.789	2016-11-12	02:12:00								2016-11-14	10:54:00	LT	1.22588	0.0663723
KAIT	2016-11-11 13:13:00	3.781	2016-11-12	02:13:00								2016-11-14	17:07:00	HT	2.87753	0.0417925
KAIT	2016-11-11 13:14:00	3.799	2016-11-12	02:14:00								2016-11-14	23:19:00	LT	1.26929	0.0325542
KAIT	2016-11-11 13:15:00	3.806	2016-11-12	02:15:00								2016-11-15	05:34:00	HT	3.05011	0.0727154
KAIT	2016-11-11 13:16:00	3.824	2016-11-12	02:16:00								2016-11-15	11:51:00	LT	1.28994	0.0378815
KAIT	2016-11-11 13:17:00	3.812	2016-11-12	02:17:00								2016-11-15	18:03:00	HT	2.96121	0.0371904
KAIT	2016-11-11 13:18:00	3.812	2016-11-12	02:18:00													0.949688	Ave
KAIT	2016-11-11 13:19:00	3.815	2016-11-12	02:19:00													0.689146	SD
KAIT	2016-11-11 13:20:00	3.821	2016-11-12	02:20:00
KAIT	2016-11-11 13:21:00	3.82	2016-11-12	02:21:00
KAIT	2016-11-11 13:22:00	3.819	2016-11-12	02:22:00
KAIT	2016-11-11 13:23:00	3.822	2016-11-12	02:23:00
KAIT	2016-11-11 13:24:00	3.828	2016-11-12	02:24:00
KAIT	2016-11-11 13:25:00	3.832	2016-11-12	02:25:00
KAIT	2016-11-11 13:26:00	3.838	2016-11-12	02:26:00
KAIT	2016-11-11 13:27:00	3.836	2016-11-12	02:27:00
KAIT	2016-11-11 13:28:00	3.852	2016-11-12	02:28:00
KAIT	2016-11-11 13:29:00	3.869	2016-11-12	02:29:00
KAIT	2016-11-11 13:30:00	3.864	2016-11-12	02:30:00
KAIT	2016-11-11 13:31:00	3.857	2016-11-12	02:31:00
KAIT	2016-11-11 13:32:00	3.835	2016-11-12	02:32:00
KAIT	2016-11-11 13:33:00	3.836	2016-11-12	02:33:00
KAIT	2016-11-11 13:34:00	3.844	2016-11-12	02:34:00
KAIT	2016-11-11 13:35:00	3.84	2016-11-12	02:35:00
KAIT	2016-11-11 13:36:00	3.84	2016-11-12	02:36:00
KAIT	2016-11-11 13:37:00	3.834	2016-11-12	02:37:00
KAIT	2016-11-11 13:38:00	3.826	2016-11-12	02:38:00
KAIT	2016-11-11 13:39:00	3.826	2016-11-12	02:39:00
KAIT	2016-11-11 13:40:00	3.828	2016-11-12	02:40:00
KAIT	2016-11-11 13:41:00	3.816	2016-11-12	02:41:00
KAIT	2016-11-11 13:42:00	3.817	2016-11-12	02:42:00
KAIT	2016-11-11 13:43:00	3.827	2016-11-12	02:43:00
KAIT	2016-11-11 13:44:00	3.823	2016-11-12	02:44:00
KAIT	2016-11-11 13:45:00	3.822	2016-11-12	02:45:00
KAIT	2016-11-11 13:46:00	3.82	2016-11-12	02:46:00
KAIT	2016-11-11 13:47:00	3.823	2016-11-12	02:47:00
KAIT	2016-11-11 13:48:00	3.835	2016-11-12	02:48:00	HT 1.8	1.8		1.8	3.8
KAIT	2016-11-11 13:49:00	3.84	2016-11-12	02:49:00	Ave	SD
KAIT	2016-11-11 13:50:00	3.836	2016-11-12	02:50:00	3.82447	0.023775
KAIT	2016-11-11 13:51:00	3.831	2016-11-12	02:51:00
KAIT	2016-11-11 13:52:00	3.84	2016-11-12	02:52:00
KAIT	2016-11-11 13:53:00	3.851	2016-11-12	02:53:00
KAIT	2016-11-11 13:54:00	3.86	2016-11-12	02:54:00
KAIT	2016-11-11 13:55:00	3.852	2016-11-12	02:55:00
KAIT	2016-11-11 13:56:00	3.854	2016-11-12	02:56:00
KAIT	2016-11-11 13:57:00	3.857	2016-11-12	02:57:00
KAIT	2016-11-11 13:58:00	3.867	2016-11-12	02:58:00
KAIT	2016-11-11 13:59:00	3.855	2016-11-12	02:59:00
KAIT	2016-11-11 14:00:00	3.854	2016-11-12	03:00:00
KAIT	2016-11-11 14:01:00	3.857	2016-11-12	03:01:00
KAIT	2016-11-11 14:02:00	3.854	2016-11-12	03:02:00
KAIT	2016-11-11 14:03:00	3.851	2016-11-12	03:03:00
KAIT	2016-11-11 14:04:00	3.841	2016-11-12	03:04:00
KAIT	2016-11-11 14:05:00	3.837	2016-11-12	03:05:00
KAIT	2016-11-11 14:06:00	3.844	2016-11-12	03:06:00
KAIT	2016-11-11 14:07:00	3.856	2016-11-12	03:07:00
KAIT	2016-11-11 14:08:00	3.834	2016-11-12	03:08:00
KAIT	2016-11-11 14:09:00	3.819	2016-11-12	03:09:00
KAIT	2016-11-11 14:10:00	3.831	2016-11-12	03:10:00
KAIT	2016-11-11 14:11:00	3.829	2016-11-12	03:11:00
KAIT	2016-11-11 14:12:00	3.838	2016-11-12	03:12:00
KAIT	2016-11-11 14:13:00	3.824	2016-11-12	03:13:00
KAIT	2016-11-11 14:14:00	3.835	2016-11-12	03:14:00
KAIT	2016-11-11 14:15:00	3.838	2016-11-12	03:15:00
KAIT	2016-11-11 14:16:00	3.832	2016-11-12	03:16:00
KAIT	2016-11-11 14:17:00	3.826	2016-11-12	03:17:00
KAIT	2016-11-11 14:18:00	3.817	2016-11-12	03:18:00
KAIT	2016-11-11 14:19:00	3.826	2016-11-12	03:19:00
KAIT	2016-11-11 14:20:00	3.82	2016-11-12	03:20:00
KAIT	2016-11-11 14:21:00	3.817	2016-11-12	03:21:00
KAIT	2016-11-11 14:22:00	3.812	2016-11-12	03:22:00
KAIT	2016-11-11 14:23:00	3.793	2016-11-12	03:23:00
KAIT	2016-11-11 14:24:00	3.797	2016-11-12	03:24:00
KAIT	2016-11-11 14:25:00	3.787	2016-11-12	03:25:00
KAIT	2016-11-11 14:26:00	3.78	2016-11-12	03:26:00
KAIT	2016-11-11 14:27:00	3.797	2016-11-12	03:27:00
KAIT	2016-11-11 14:28:00	3.809	2016-11-12	03:28:00
KAIT	2016-11-11 14:29:00	3.813	2016-11-12	03:29:00
KAIT	2016-11-11 14:30:00	3.823	2016-11-12	03:30:00
KAIT	2016-11-11 14:31:00	3.823	2016-11-12	03:31:00
KAIT	2016-11-11 14:32:00	3.8	2016-11-12	03:32:00
KAIT	2016-11-11 14:33:00	3.807	2016-11-12	03:33:00
KAIT	2016-11-11 14:34:00	3.82	2016-11-12	03:34:00
KAIT	2016-11-11 14:35:00	3.817	2016-11-12	03:35:00
KAIT	2016-11-11 14:36:00	3.805	2016-11-12	03:36:00
KAIT	2016-11-11 14:37:00	3.793	2016-11-12	03:37:00
KAIT	2016-11-11 14:38:00	3.795	2016-11-12	03:38:00
KAIT	2016-11-11 14:39:00	3.796	2016-11-12	03:39:00
KAIT	2016-11-11 14:40:00	3.788	2016-11-12	03:40:00
KAIT	2016-11-11 14:41:00	3.771	2016-11-12	03:41:00
KAIT	2016-11-11 14:42:00	3.762	2016-11-12	03:42:00
KAIT	2016-11-11 14:43:00	3.772	2016-11-12	03:43:00
KAIT	2016-11-11 14:44:00	3.78	2016-11-12	03:44:00
KAIT	2016-11-11 14:45:00	3.782	2016-11-12	03:45:00
KAIT	2016-11-11 14:46:00	3.774	2016-11-12	03:46:00
KAIT	2016-11-11 14:47:00	3.778	2016-11-12	03:47:00
KAIT	2016-11-11 14:48:00	3.775	2016-11-12	03:48:00
KAIT	2016-11-11 14:49:00	3.768	2016-11-12	03:49:00
KAIT	2016-11-11 14:50:00	3.765	2016-11-12	03:50:00
KAIT	2016-11-11 14:51:00	3.762	2016-11-12	03:51:00
KAIT	2016-11-11 14:52:00	3.758	2016-11-12	03:52:00
KAIT	2016-11-11 14:53:00	3.761	2016-11-12	03:53:00
KAIT	2016-11-11 14:54:00	3.756	2016-11-12	03:54:00
KAIT	2016-11-11 14:55:00	3.737	2016-11-12	03:55:00
KAIT	2016-11-11 14:56:00	3.722	2016-11-12	03:56:00
KAIT	2016-11-11 14:57:00	3.722	2016-11-12	03:57:00
KAIT	2016-11-11 14:58:00	3.704	2016-11-12	03:58:00
KAIT	2016-11-11 14:59:00	3.699	2016-11-12	03:59:00
KAIT	2016-11-11 15:00:00	3.686	2016-11-12	04:00:00
KAIT	2016-11-11 15:01:00	3.69	2016-11-12	04:01:00
KAIT	2016-11-11 15:02:00	3.687	2016-11-12	04:02:00
KAIT	2016-11-11 15:03:00	3.703	2016-11-12	04:03:00
KAIT	2016-11-11 15:04:00	3.714	2016-11-12	04:04:00
KAIT	2016-11-11 15:05:00	3.716	2016-11-12	04:05:00
KAIT	2016-11-11 15:06:00	3.712	2016-11-12	04:06:00
KAIT	2016-11-11 15:07:00	3.71	2016-11-12	04:07:00
KAIT	2016-11-11 15:08:00	3.708	2016-11-12	04:08:00
KAIT	2016-11-11 15:09:00	3.698	2016-11-12	04:09:00
KAIT	2016-11-11 15:10:00	3.693	2016-11-12	04:10:00
KAIT	2016-11-11 15:11:00	3.689	2016-11-12	04:11:00
KAIT	2016-11-11 15:12:00	3.676	2016-11-12	04:12:00
KAIT	2016-11-11 15:13:00	3.67	2016-11-12	04:13:00
KAIT	2016-11-11 15:14:00	3.663	2016-11-12	04:14:00
KAIT	2016-11-11 15:15:00	3.659	2016-11-12	04:15:00
KAIT	2016-11-11 15:16:00	3.647	2016-11-12	04:16:00
KAIT	2016-11-11 15:17:00	3.664	2016-11-12	04:17:00
KAIT	2016-11-11 15:18:00	3.669	2016-11-12	04:18:00
KAIT	2016-11-11 15:19:00	3.672	2016-11-12	04:19:00
KAIT	2016-11-11 15:20:00	3.678	2016-11-12	04:20:00
KAIT	2016-11-11 15:21:00	3.678	2016-11-12	04:21:00
KAIT	2016-11-11 15:22:00	3.671	2016-11-12	04:22:00
KAIT	2016-11-11 15:23:00	3.651	2016-11-12	04:23:00
KAIT	2016-11-11 15:24:00	3.657	2016-11-12	04:24:00
KAIT	2016-11-11 15:25:00	3.637	2016-11-12	04:25:00
KAIT	2016-11-11 15:26:00	3.631	2016-11-12	04:26:00
KAIT	2016-11-11 15:27:00	3.62	2016-11-12	04:27:00
KAIT	2016-11-11 15:28:00	3.602	2016-11-12	04:28:00
KAIT	2016-11-11 15:29:00	3.595	2016-11-12	04:29:00
KAIT	2016-11-11 15:30:00	3.585	2016-11-12	04:30:00
KAIT	2016-11-11 15:31:00	3.584	2016-11-12	04:31:00
KAIT	2016-11-11 15:32:00	3.574	2016-11-12	04:32:00
KAIT	2016-11-11 15:33:00	3.568	2016-11-12	04:33:00
KAIT	2016-11-11 15:34:00	3.563	2016-11-12	04:34:00
KAIT	2016-11-11 15:35:00	3.573	2016-11-12	04:35:00
KAIT	2016-11-11 15:36:00	3.576	2016-11-12	04:36:00
KAIT	2016-11-11 15:37:00	3.553	2016-11-12	04:37:00
KAIT	2016-11-11 15:38:00	3.551	2016-11-12	04:38:00
KAIT	2016-11-11 15:39:00	3.558	2016-11-12	04:39:00
KAIT	2016-11-11 15:40:00	3.556	2016-11-12	04:40:00
KAIT	2016-11-11 15:41:00	3.543	2016-11-12	04:41:00
KAIT	2016-11-11 15:42:00	3.558	2016-11-12	04:42:00
KAIT	2016-11-11 15:43:00	3.527	2016-11-12	04:43:00
KAIT	2016-11-11 15:44:00	3.539	2016-11-12	04:44:00
KAIT	2016-11-11 15:45:00	3.525	2016-11-12	04:45:00
KAIT	2016-11-11 15:46:00	3.524	2016-11-12	04:46:00
KAIT	2016-11-11 15:47:00	3.504	2016-11-12	04:47:00
KAIT	2016-11-11 15:48:00	3.49	2016-11-12	04:48:00
KAIT	2016-11-11 15:49:00	3.479	2016-11-12	04:49:00
KAIT	2016-11-11 15:50:00	3.483	2016-11-12	04:50:00
KAIT	2016-11-11 15:51:00	3.484	2016-11-12	04:51:00
KAIT	2016-11-11 15:52:00	3.494	2016-11-12	04:52:00
KAIT	2016-11-11 15:53:00	3.491	2016-11-12	04:53:00
KAIT	2016-11-11 15:54:00	3.496	2016-11-12	04:54:00
KAIT	2016-11-11 15:55:00	3.486	2016-11-12	04:55:00
KAIT	2016-11-11 15:56:00	3.487	2016-11-12	04:56:00
KAIT	2016-11-11 15:57:00	3.471	2016-11-12	04:57:00
KAIT	2016-11-11 15:58:00	3.47	2016-11-12	04:58:00
KAIT	2016-11-11 15:59:00	3.455	2016-11-12	04:59:00
KAIT	2016-11-11 16:00:00	3.468	2016-11-12	05:00:00
KAIT	2016-11-11 16:01:00	3.46	2016-11-12	05:01:00
KAIT	2016-11-11 16:02:00	3.444	2016-11-12	05:02:00
KAIT	2016-11-11 16:03:00	3.433	2016-11-12	05:03:00
KAIT	2016-11-11 16:04:00	3.438	2016-11-12	05:04:00
KAIT	2016-11-11 16:05:00	3.414	2016-11-12	05:05:00
KAIT	2016-11-11 16:06:00	3.414	2016-11-12	05:06:00
KAIT	2016-11-11 16:07:00	3.396	2016-11-12	05:07:00
KAIT	2016-11-11 16:08:00	3.4	2016-11-12	05:08:00
KAIT	2016-11-11 16:09:00	3.395	2016-11-12	05:09:00
KAIT	2016-11-11 16:10:00	3.398	2016-11-12	05:10:00
KAIT	2016-11-11 16:11:00	3.389	2016-11-12	05:11:00
KAIT	2016-11-11 16:12:00	3.38	2016-11-12	05:12:00
KAIT	2016-11-11 16:13:00	3.37	2016-11-12	05:13:00
KAIT	2016-11-11 16:14:00	3.344	2016-11-12	05:14:00
KAIT	2016-11-11 16:15:00	3.363	2016-11-12	05:15:00
KAIT	2016-11-11 16:16:00	3.343	2016-11-12	05:16:00
KAIT	2016-11-11 16:17:00	3.356	2016-11-12	05:17:00
KAIT	2016-11-11 16:18:00	3.341	2016-11-12	05:18:00
KAIT	2016-11-11 16:19:00	3.32	2016-11-12	05:19:00
KAIT	2016-11-11 16:20:00	3.318	2016-11-12	05:20:00
KAIT	2016-11-11 16:21:00	3.302	2016-11-12	05:21:00
KAIT	2016-11-11 16:22:00	3.311	2016-11-12	05:22:00
KAIT	2016-11-11 16:23:00	3.298	2016-11-12	05:23:00
KAIT	2016-11-11 16:24:00	3.296	2016-11-12	05:24:00
KAIT	2016-11-11 16:25:00	3.288	2016-11-12	05:25:00
KAIT	2016-11-11 16:26:00	3.298	2016-11-12	05:26:00
KAIT	2016-11-11 16:27:00	3.285	2016-11-12	05:27:00
KAIT	2016-11-11 16:28:00	3.262	2016-11-12	05:28:00
KAIT	2016-11-11 16:29:00	3.257	2016-11-12	05:29:00
KAIT	2016-11-11 16:30:00	3.254	2016-11-12	05:30:00
KAIT	2016-11-11 16:31:00	3.255	2016-11-12	05:31:00
KAIT	2016-11-11 16:32:00	3.272	2016-11-12	05:32:00
KAIT	2016-11-11 16:33:00	3.256	2016-11-12	05:33:00
KAIT	2016-11-11 16:34:00	3.257	2016-11-12	05:34:00
KAIT	2016-11-11 16:35:00	3.247	2016-11-12	05:35:00
KAIT	2016-11-11 16:36:00	3.234	2016-11-12	05:36:00
KAIT	2016-11-11 16:37:00	3.223	2016-11-12	05:37:00
KAIT	2016-11-11 16:38:00	3.224	2016-11-12	05:38:00
KAIT	2016-11-11 16:39:00	3.222	2016-11-12	05:39:00
KAIT	2016-11-11 16:40:00	3.2	2016-11-12	05:40:00
KAIT	2016-11-11 16:41:00	3.212	2016-11-12	05:41:00
KAIT	2016-11-11 16:42:00	3.223	2016-11-12	05:42:00
KAIT	2016-11-11 16:43:00	3.21	2016-11-12	05:43:00
KAIT	2016-11-11 16:44:00	3.193	2016-11-12	05:44:00
KAIT	2016-11-11 16:45:00	3.193	2016-11-12	05:45:00
KAIT	2016-11-11 16:46:00	3.198	2016-11-12	05:46:00
KAIT	2016-11-11 16:47:00	3.183	2016-11-12	05:47:00
KAIT	2016-11-11 16:48:00	3.173	2016-11-12	05:48:00
KAIT	2016-11-11 16:49:00	3.173	2016-11-12	05:49:00
KAIT	2016-11-11 16:50:00	3.151	2016-11-12	05:50:00
KAIT	2016-11-11 16:51:00	3.143	2016-11-12	05:51:00
KAIT	2016-11-11 16:52:00	3.119	2016-11-12	05:52:00
KAIT	2016-11-11 16:53:00	3.119	2016-11-12	05:53:00
KAIT	2016-11-11 16:54:00	3.1	2016-11-12	05:54:00
KAIT	2016-11-11 16:55:00	3.086	2016-11-12	05:55:00
KAIT	2016-11-11 16:56:00	3.066	2016-11-12	05:56:00
KAIT	2016-11-11 16:57:00	3.051	2016-11-12	05:57:00
KAIT	2016-11-11 16:58:00	3.04	2016-11-12	05:58:00
KAIT	2016-11-11 16:59:00	3.037	2016-11-12	05:59:00
KAIT	2016-11-11 17:00:00	3.051	2016-11-12	06:00:00
KAIT	2016-11-11 17:01:00	3.049	2016-11-12	06:01:00
KAIT	2016-11-11 17:02:00	3.042	2016-11-12	06:02:00
KAIT	2016-11-11 17:03:00	3.04	2016-11-12	06:03:00
KAIT	2016-11-11 17:04:00	3.039	2016-11-12	06:04:00
KAIT	2016-11-11 17:05:00	3.044	2016-11-12	06:05:00
KAIT	2016-11-11 17:06:00	3.038	2016-11-12	06:06:00
KAIT	2016-11-11 17:07:00	3.037	2016-11-12	06:07:00
KAIT	2016-11-11 17:08:00	3.032	2016-11-12	06:08:00
KAIT	2016-11-11 17:09:00	3.024	2016-11-12	06:09:00
KAIT	2016-11-11 17:10:00	3.016	2016-11-12	06:10:00
KAIT	2016-11-11 17:11:00	3.016	2016-11-12	06:11:00
KAIT	2016-11-11 17:12:00	3.029	2016-11-12	06:12:00
KAIT	2016-11-11 17:13:00	3.018	2016-11-12	06:13:00
KAIT	2016-11-11 17:14:00	3.018	2016-11-12	06:14:00
KAIT	2016-11-11 17:15:00	3.018	2016-11-12	06:15:00
KAIT	2016-11-11 17:16:00	3.004	2016-11-12	06:16:00
KAIT	2016-11-11 17:17:00	3.016	2016-11-12	06:17:00
KAIT	2016-11-11 17:18:00	2.999	2016-11-12	06:18:00
KAIT	2016-11-11 17:19:00	2.989	2016-11-12	06:19:00
KAIT	2016-11-11 17:20:00	2.971	2016-11-12	06:20:00
KAIT	2016-11-11 17:21:00	2.973	2016-11-12	06:21:00
KAIT	2016-11-11 17:22:00	2.959	2016-11-12	06:22:00
KAIT	2016-11-11 17:23:00	2.952	2016-11-12	06:23:00
KAIT	2016-11-11 17:24:00	2.936	2016-11-12	06:24:00
KAIT	2016-11-11 17:25:00	2.937	2016-11-12	06:25:00
KAIT	2016-11-11 17:26:00	2.923	2016-11-12	06:26:00
KAIT	2016-11-11 17:27:00	2.904	2016-11-12	06:27:00
KAIT	2016-11-11 17:28:00	2.902	2016-11-12	06:28:00
KAIT	2016-11-11 17:29:00	2.885	2016-11-12	06:29:00
KAIT	2016-11-11 17:30:00	2.87	2016-11-12	06:30:00
KAIT	2016-11-11 17:31:00	2.859	2016-11-12	06:31:00
KAIT	2016-11-11 17:32:00	2.859	2016-11-12	06:32:00
KAIT	2016-11-11 17:33:00	2.867	2016-11-12	06:33:00
KAIT	2016-11-11 17:34:00	2.872	2016-11-12	06:34:00
KAIT	2016-11-11 17:35:00	2.875	2016-11-12	06:35:00
KAIT	2016-11-11 17:36:00	2.878	2016-11-12	06:36:00
KAIT	2016-11-11 17:37:00	2.853	2016-11-12	06:37:00
KAIT	2016-11-11 17:38:00	2.864	2016-11-12	06:38:00
KAIT	2016-11-11 17:39:00	2.854	2016-11-12	06:39:00
KAIT	2016-11-11 17:40:00	2.848	2016-11-12	06:40:00
KAIT	2016-11-11 17:41:00	2.819	2016-11-12	06:41:00
KAIT	2016-11-11 17:42:00	2.821	2016-11-12	06:42:00
KAIT	2016-11-11 17:43:00	2.815	2016-11-12	06:43:00
KAIT	2016-11-11 17:44:00	2.81	2016-11-12	06:44:00
KAIT	2016-11-11 17:45:00	2.806	2016-11-12	06:45:00
KAIT	2016-11-11 17:46:00	2.795	2016-11-12	06:46:00
KAIT	2016-11-11 17:47:00	2.802	2016-11-12	06:47:00
KAIT	2016-11-11 17:48:00	2.806	2016-11-12	06:48:00
KAIT	2016-11-11 17:49:00	2.813	2016-11-12	06:49:00
KAIT	2016-11-11 17:50:00	2.822	2016-11-12	06:50:00
KAIT	2016-11-11 17:51:00	2.805	2016-11-12	06:51:00
KAIT	2016-11-11 17:52:00	2.806	2016-11-12	06:52:00
KAIT	2016-11-11 17:53:00	2.81	2016-11-12	06:53:00
KAIT	2016-11-11 17:54:00	2.802	2016-11-12	06:54:00
KAIT	2016-11-11 17:55:00	2.807	2016-11-12	06:55:00
KAIT	2016-11-11 17:56:00	2.782	2016-11-12	06:56:00
KAIT	2016-11-11 17:57:00	2.779	2016-11-12	06:57:00
KAIT	2016-11-11 17:58:00	2.774	2016-11-12	06:58:00
KAIT	2016-11-11 17:59:00	2.755	2016-11-12	06:59:00
KAIT	2016-11-11 18:00:00	2.76	2016-11-12	07:00:00
KAIT	2016-11-11 18:01:00	2.748	2016-11-12	07:01:00
KAIT	2016-11-11 18:02:00	2.755	2016-11-12	07:02:00
KAIT	2016-11-11 18:03:00	2.744	2016-11-12	07:03:00
KAIT	2016-11-11 18:04:00	2.73	2016-11-12	07:04:00
KAIT	2016-11-11 18:05:00	2.735	2016-11-12	07:05:00
KAIT	2016-11-11 18:06:00	2.717	2016-11-12	07:06:00
KAIT	2016-11-11 18:07:00	2.701	2016-11-12	07:07:00
KAIT	2016-11-11 18:08:00	2.704	2016-11-12	07:08:00
KAIT	2016-11-11 18:09:00	2.689	2016-11-12	07:09:00
KAIT	2016-11-11 18:10:00	2.685	2016-11-12	07:10:00
KAIT	2016-11-11 18:11:00	2.678	2016-11-12	07:11:00
KAIT	2016-11-11 18:12:00	2.671	2016-11-12	07:12:00
KAIT	2016-11-11 18:13:00	2.683	2016-11-12	07:13:00
KAIT	2016-11-11 18:14:00	2.678	2016-11-12	07:14:00
KAIT	2016-11-11 18:15:00	2.671	2016-11-12	07:15:00
KAIT	2016-11-11 18:16:00	2.679	2016-11-12	07:16:00
KAIT	2016-11-11 18:17:00	2.677	2016-11-12	07:17:00
KAIT	2016-11-11 18:18:00	2.669	2016-11-12	07:18:00
KAIT	2016-11-11 18:19:00	2.66	2016-11-12	07:19:00
KAIT	2016-11-11 18:20:00	2.651	2016-11-12	07:20:00
KAIT	2016-11-11 18:21:00	2.652	2016-11-12	07:21:00
KAIT	2016-11-11 18:22:00	2.644	2016-11-12	07:22:00
KAIT	2016-11-11 18:23:00	2.646	2016-11-12	07:23:00
KAIT	2016-11-11 18:24:00	2.653	2016-11-12	07:24:00
KAIT	2016-11-11 18:25:00	2.639	2016-11-12	07:25:00
KAIT	2016-11-11 18:26:00	2.636	2016-11-12	07:26:00
KAIT	2016-11-11 18:27:00	2.628	2016-11-12	07:27:00
KAIT	2016-11-11 18:28:00	2.638	2016-11-12	07:28:00
KAIT	2016-11-11 18:29:00	2.642	2016-11-12	07:29:00
KAIT	2016-11-11 18:30:00	2.631	2016-11-12	07:30:00
KAIT	2016-11-11 18:31:00	2.621	2016-11-12	07:31:00
KAIT	2016-11-11 18:32:00	2.601	2016-11-12	07:32:00
KAIT	2016-11-11 18:33:00	2.612	2016-11-12	07:33:00
KAIT	2016-11-11 18:34:00	2.596	2016-11-12	07:34:00
KAIT	2016-11-11 18:35:00	2.592	2016-11-12	07:35:00
KAIT	2016-11-11 18:36:00	2.595	2016-11-12	07:36:00
KAIT	2016-11-11 18:37:00	2.586	2016-11-12	07:37:00
KAIT	2016-11-11 18:38:00	2.592	2016-11-12	07:38:00
KAIT	2016-11-11 18:39:00	2.589	2016-11-12	07:39:00
KAIT	2016-11-11 18:40:00	2.596	2016-11-12	07:40:00
KAIT	2016-11-11 18:41:00	2.583	2016-11-12	07:41:00
KAIT	2016-11-11 18:42:00	2.581	2016-11-12	07:42:00
KAIT	2016-11-11 18:43:00	2.579	2016-11-12	07:43:00
KAIT	2016-11-11 18:44:00	2.569	2016-11-12	07:44:00
KAIT	2016-11-11 18:45:00	2.564	2016-11-12	07:45:00
KAIT	2016-11-11 18:46:00	2.561	2016-11-12	07:46:00
KAIT	2016-11-11 18:47:00	2.557	2016-11-12	07:47:00
KAIT	2016-11-11 18:48:00	2.541	2016-11-12	07:48:00
KAIT	2016-11-11 18:49:00	2.535	2016-11-12	07:49:00
KAIT	2016-11-11 18:50:00	2.536	2016-11-12	07:50:00
KAIT	2016-11-11 18:51:00	2.543	2016-11-12	07:51:00
KAIT	2016-11-11 18:52:00	2.535	2016-11-12	07:52:00
KAIT	2016-11-11 18:53:00	2.546	2016-11-12	07:53:00
KAIT	2016-11-11 18:54:00	2.529	2016-11-12	07:54:00
KAIT	2016-11-11 18:55:00	2.516	2016-11-12	07:55:00
KAIT	2016-11-11 18:56:00	2.517	2016-11-12	07:56:00
KAIT	2016-11-11 18:57:00	2.511	2016-11-12	07:57:00
KAIT	2016-11-11 18:58:00	2.508	2016-11-12	07:58:00
KAIT	2016-11-11 18:59:00	2.505	2016-11-12	07:59:00
KAIT	2016-11-11 19:00:00	2.505	2016-11-12	08:00:00
KAIT	2016-11-11 19:01:00	2.514	2016-11-12	08:01:00
KAIT	2016-11-11 19:02:00	2.517	2016-11-12	08:02:00
KAIT	2016-11-11 19:03:00	2.508	2016-11-12	08:03:00
KAIT	2016-11-11 19:04:00	2.518	2016-11-12	08:04:00
KAIT	2016-11-11 19:05:00	2.513	2016-11-12	08:05:00
KAIT	2016-11-11 19:06:00	2.502	2016-11-12	08:06:00
KAIT	2016-11-11 19:07:00	2.49	2016-11-12	08:07:00
KAIT	2016-11-11 19:08:00	2.489	2016-11-12	08:08:00
KAIT	2016-11-11 19:09:00	2.484	2016-11-12	08:09:00
KAIT	2016-11-11 19:10:00	2.464	2016-11-12	08:10:00
KAIT	2016-11-11 19:11:00	2.47	2016-11-12	08:11:00
KAIT	2016-11-11 19:12:00	2.47	2016-11-12	08:12:00
KAIT	2016-11-11 19:13:00	2.461	2016-11-12	08:13:00
KAIT	2016-11-11 19:14:00	2.446	2016-11-12	08:14:00
KAIT	2016-11-11 19:15:00	2.458	2016-11-12	08:15:00
KAIT	2016-11-11 19:16:00	2.462	2016-11-12	08:16:00
KAIT	2016-11-11 19:17:00	2.463	2016-11-12	08:17:00
KAIT	2016-11-11 19:18:00	2.46	2016-11-12	08:18:00
KAIT	2016-11-11 19:19:00	2.475	2016-11-12	08:19:00
KAIT	2016-11-11 19:20:00	2.457	2016-11-12	08:20:00
KAIT	2016-11-11 19:21:00	2.466	2016-11-12	08:21:00
KAIT	2016-11-11 19:22:00	2.468	2016-11-12	08:22:00
KAIT	2016-11-11 19:23:00	2.462	2016-11-12	08:23:00
KAIT	2016-11-11 19:24:00	2.451	2016-11-12	08:24:00
KAIT	2016-11-11 19:25:00	2.439	2016-11-12	08:25:00
KAIT	2016-11-11 19:26:00	2.449	2016-11-12	08:26:00
KAIT	2016-11-11 19:27:00	2.461	2016-11-12	08:27:00
KAIT	2016-11-11 19:28:00	2.447	2016-11-12	08:28:00
KAIT	2016-11-11 19:29:00	2.455	2016-11-12	08:29:00
KAIT	2016-11-11 19:30:00	2.453	2016-11-12	08:30:00
KAIT	2016-11-11 19:31:00	2.468	2016-11-12	08:31:00
KAIT	2016-11-11 19:32:00	2.438	2016-11-12	08:32:00
KAIT	2016-11-11 19:33:00	2.438	2016-11-12	08:33:00
KAIT	2016-11-11 19:34:00	2.423	2016-11-12	08:34:00
KAIT	2016-11-11 19:35:00	2.436	2016-11-12	08:35:00
KAIT	2016-11-11 19:36:00	2.43	2016-11-12	08:36:00
KAIT	2016-11-11 19:37:00	2.426	2016-11-12	08:37:00
KAIT	2016-11-11 19:38:00	2.422	2016-11-12	08:38:00
KAIT	2016-11-11 19:39:00	2.424	2016-11-12	08:39:00
KAIT	2016-11-11 19:40:00	2.429	2016-11-12	08:40:00
KAIT	2016-11-11 19:41:00	2.424	2016-11-12	08:41:00
KAIT	2016-11-11 19:42:00	2.416	2016-11-12	08:42:00
KAIT	2016-11-11 19:43:00	2.413	2016-11-12	08:43:00
KAIT	2016-11-11 19:44:00	2.413	2016-11-12	08:44:00
KAIT	2016-11-11 19:45:00	2.42	2016-11-12	08:45:00
KAIT	2016-11-11 19:46:00	2.426	2016-11-12	08:46:00
KAIT	2016-11-11 19:47:00	2.421	2016-11-12	08:47:00
KAIT	2016-11-11 19:48:00	2.419	2016-11-12	08:48:00
KAIT	2016-11-11 19:49:00	2.429	2016-11-12	08:49:00
KAIT	2016-11-11 19:50:00	2.427	2016-11-12	08:50:00
KAIT	2016-11-11 19:51:00	2.433	2016-11-12	08:51:00
KAIT	2016-11-11 19:52:00	2.434	2016-11-12	08:52:00
KAIT	2016-11-11 19:53:00	2.446	2016-11-12	08:53:00
KAIT	2016-11-11 19:54:00	2.442	2016-11-12	08:54:00
KAIT	2016-11-11 19:55:00	2.448	2016-11-12	08:55:00
KAIT	2016-11-11 19:56:00	2.451	2016-11-12	08:56:00
KAIT	2016-11-11 19:57:00	2.448	2016-11-12	08:57:00
KAIT	2016-11-11 19:58:00	2.428	2016-11-12	08:58:00
KAIT	2016-11-11 19:59:00	2.423	2016-11-12	08:59:00
KAIT	2016-11-11 20:00:00	2.416	2016-11-12	09:00:00
KAIT	2016-11-11 20:01:00	2.405	2016-11-12	09:01:00	LT 0.3			0.3	2.3
KAIT	2016-11-11 20:02:00	2.403	2016-11-12	09:02:00	Ave	SD
KAIT	2016-11-11 20:03:00	2.401	2016-11-12	09:03:00	2.42984	0.0192266
KAIT	2016-11-11 20:04:00	2.401	2016-11-12	09:04:00
KAIT	2016-11-11 20:05:00	2.398	2016-11-12	09:05:00
KAIT	2016-11-11 20:06:00	2.403	2016-11-12	09:06:00
KAIT	2016-11-11 20:07:00	2.402	2016-11-12	09:07:00
KAIT	2016-11-11 20:08:00	2.414	2016-11-12	09:08:00
KAIT	2016-11-11 20:09:00	2.403	2016-11-12	09:09:00
KAIT	2016-11-11 20:10:00	2.402	2016-11-12	09:10:00
KAIT	2016-11-11 20:11:00	2.403	2016-11-12	09:11:00
KAIT	2016-11-11 20:12:00	2.406	2016-11-12	09:12:00
KAIT	2016-11-11 20:13:00	2.408	2016-11-12	09:13:00
KAIT	2016-11-11 20:14:00	2.399	2016-11-12	09:14:00
KAIT	2016-11-11 20:15:00	2.41	2016-11-12	09:15:00
KAIT	2016-11-11 20:16:00	2.404	2016-11-12	09:16:00
KAIT	2016-11-11 20:17:00	2.41	2016-11-12	09:17:00
KAIT	2016-11-11 20:18:00	2.417	2016-11-12	09:18:00
KAIT	2016-11-11 20:19:00	2.407	2016-11-12	09:19:00
KAIT	2016-11-11 20:20:00	2.407	2016-11-12	09:20:00
KAIT	2016-11-11 20:21:00	2.414	2016-11-12	09:21:00
KAIT	2016-11-11 20:22:00	2.413	2016-11-12	09:22:00
KAIT	2016-11-11 20:23:00	2.415	2016-11-12	09:23:00
KAIT	2016-11-11 20:24:00	2.426	2016-11-12	09:24:00
KAIT	2016-11-11 20:25:00	2.437	2016-11-12	09:25:00
KAIT	2016-11-11 20:26:00	2.431	2016-11-12	09:26:00
KAIT	2016-11-11 20:27:00	2.425	2016-11-12	09:27:00
KAIT	2016-11-11 20:28:00	2.434	2016-11-12	09:28:00
KAIT	2016-11-11 20:29:00	2.426	2016-11-12	09:29:00
KAIT	2016-11-11 20:30:00	2.43	2016-11-12	09:30:00
KAIT	2016-11-11 20:31:00	2.429	2016-11-12	09:31:00
KAIT	2016-11-11 20:32:00	2.438	2016-11-12	09:32:00
KAIT	2016-11-11 20:33:00	2.432	2016-11-12	09:33:00
KAIT	2016-11-11 20:34:00	2.427	2016-11-12	09:34:00
KAIT	2016-11-11 20:35:00	2.431	2016-11-12	09:35:00
KAIT	2016-11-11 20:36:00	2.432	2016-11-12	09:36:00
KAIT	2016-11-11 20:37:00	2.424	2016-11-12	09:37:00
KAIT	2016-11-11 20:38:00	2.436	2016-11-12	09:38:00
KAIT	2016-11-11 20:39:00	2.432	2016-11-12	09:39:00
KAIT	2016-11-11 20:40:00	2.444	2016-11-12	09:40:00
KAIT	2016-11-11 20:41:00	2.436	2016-11-12	09:41:00
KAIT	2016-11-11 20:42:00	2.449	2016-11-12	09:42:00
KAIT	2016-11-11 20:43:00	2.452	2016-11-12	09:43:00
KAIT	2016-11-11 20:44:00	2.447	2016-11-12	09:44:00
KAIT	2016-11-11 20:45:00	2.444	2016-11-12	09:45:00
KAIT	2016-11-11 20:46:00	2.459	2016-11-12	09:46:00
KAIT	2016-11-11 20:47:00	2.459	2016-11-12	09:47:00
KAIT	2016-11-11 20:48:00	2.44	2016-11-12	09:48:00
KAIT	2016-11-11 20:49:00	2.449	2016-11-12	09:49:00
KAIT	2016-11-11 20:50:00	2.455	2016-11-12	09:50:00
KAIT	2016-11-11 20:51:00	2.447	2016-11-12	09:51:00
KAIT	2016-11-11 20:52:00	2.454	2016-11-12	09:52:00
KAIT	2016-11-11 20:53:00	2.452	2016-11-12	09:53:00
KAIT	2016-11-11 20:54:00	2.454	2016-11-12	09:54:00
KAIT	2016-11-11 20:55:00	2.451	2016-11-12	09:55:00
KAIT	2016-11-11 20:56:00	2.455	2016-11-12	09:56:00
KAIT	2016-11-11 20:57:00	2.463	2016-11-12	09:57:00
KAIT	2016-11-11 20:58:00	2.47	2016-11-12	09:58:00
KAIT	2016-11-11 20:59:00	2.473	2016-11-12	09:59:00
KAIT	2016-11-11 21:00:00	2.477	2016-11-12	10:00:00
KAIT	2016-11-11 21:01:00	2.472	2016-11-12	10:01:00
KAIT	2016-11-11 21:02:00	2.483	2016-11-12	10:02:00
KAIT	2016-11-11 21:03:00	2.481	2016-11-12	10:03:00
KAIT	2016-11-11 21:04:00	2.494	2016-11-12	10:04:00
KAIT	2016-11-11 21:05:00	2.506	2016-11-12	10:05:00
KAIT	2016-11-11 21:06:00	2.507	2016-11-12	10:06:00
KAIT	2016-11-11 21:07:00	2.524	2016-11-12	10:07:00
KAIT	2016-11-11 21:08:00	2.526	2016-11-12	10:08:00
KAIT	2016-11-11 21:09:00	2.548	2016-11-12	10:09:00
KAIT	2016-11-11 21:10:00	2.551	2016-11-12	10:10:00
KAIT	2016-11-11 21:11:00	2.544	2016-11-12	10:11:00
KAIT	2016-11-11 21:12:00	2.546	2016-11-12	10:12:00
KAIT	2016-11-11 21:13:00	2.551	2016-11-12	10:13:00
KAIT	2016-11-11 21:14:00	2.558	2016-11-12	10:14:00
KAIT	2016-11-11 21:15:00	2.554	2016-11-12	10:15:00
KAIT	2016-11-11 21:16:00	2.556	2016-11-12	10:16:00
KAIT	2016-11-11 21:17:00	2.557	2016-11-12	10:17:00
KAIT	2016-11-11 21:18:00	2.575	2016-11-12	10:18:00
KAIT	2016-11-11 21:19:00	2.565	2016-11-12	10:19:00
KAIT	2016-11-11 21:20:00	2.574	2016-11-12	10:20:00
KAIT	2016-11-11 21:21:00	2.565	2016-11-12	10:21:00
KAIT	2016-11-11 21:22:00	2.573	2016-11-12	10:22:00
KAIT	2016-11-11 21:23:00	2.57	2016-11-12	10:23:00
KAIT	2016-11-11 21:24:00	2.558	2016-11-12	10:24:00
KAIT	2016-11-11 21:25:00	2.561	2016-11-12	10:25:00
KAIT	2016-11-11 21:26:00	2.555	2016-11-12	10:26:00
KAIT	2016-11-11 21:27:00	2.558	2016-11-12	10:27:00
KAIT	2016-11-11 21:28:00	2.554	2016-11-12	10:28:00
KAIT	2016-11-11 21:29:00	2.574	2016-11-12	10:29:00
KAIT	2016-11-11 21:30:00	2.569	2016-11-12	10:30:00
KAIT	2016-11-11 21:31:00	2.573	2016-11-12	10:31:00
KAIT	2016-11-11 21:32:00	2.586	2016-11-12	10:32:00
KAIT	2016-11-11 21:33:00	2.593	2016-11-12	10:33:00
KAIT	2016-11-11 21:34:00	2.598	2016-11-12	10:34:00
KAIT	2016-11-11 21:35:00	2.607	2016-11-12	10:35:00
KAIT	2016-11-11 21:36:00	2.612	2016-11-12	10:36:00
KAIT	2016-11-11 21:37:00	2.615	2016-11-12	10:37:00
KAIT	2016-11-11 21:38:00	2.617	2016-11-12	10:38:00
KAIT	2016-11-11 21:39:00	2.629	2016-11-12	10:39:00
KAIT	2016-11-11 21:40:00	2.632	2016-11-12	10:40:00
KAIT	2016-11-11 21:41:00	2.654	2016-11-12	10:41:00
KAIT	2016-11-11 21:42:00	2.647	2016-11-12	10:42:00
KAIT	2016-11-11 21:43:00	2.658	2016-11-12	10:43:00
KAIT	2016-11-11 21:44:00	2.663	2016-11-12	10:44:00
KAIT	2016-11-11 21:45:00	2.668	2016-11-12	10:45:00
KAIT	2016-11-11 21:46:00	2.679	2016-11-12	10:46:00
KAIT	2016-11-11 21:47:00	2.678	2016-11-12	10:47:00
KAIT	2016-11-11 21:48:00	2.682	2016-11-12	10:48:00
KAIT	2016-11-11 21:49:00	2.68	2016-11-12	10:49:00
KAIT	2016-11-11 21:50:00	2.676	2016-11-12	10:50:00
KAIT	2016-11-11 21:51:00	2.688	2016-11-12	10:51:00
KAIT	2016-11-11 21:52:00	2.702	2016-11-12	10:52:00
KAIT	2016-11-11 21:53:00	2.699	2016-11-12	10:53:00
KAIT	2016-11-11 21:54:00	2.713	2016-11-12	10:54:00
KAIT	2016-11-11 21:55:00	2.716	2016-11-12	10:55:00
KAIT	2016-11-11 21:56:00	2.718	2016-11-12	10:56:00
KAIT	2016-11-11 21:57:00	2.708	2016-11-12	10:57:00
KAIT	2016-11-11 21:58:00	2.708	2016-11-12	10:58:00
KAIT	2016-11-11 21:59:00	2.712	2016-11-12	10:59:00
KAIT	2016-11-11 22:00:00	2.714	2016-11-12	11:00:00
KAIT	2016-11-11 22:01:00	2.721	2016-11-12	11:01:00
KAIT	2016-11-11 22:02:00	2.729	2016-11-12	11:02:00
KAIT	2016-11-11 22:03:00	2.733	2016-11-12	11:03:00
KAIT	2016-11-11 22:04:00	2.74	2016-11-12	11:04:00
KAIT	2016-11-11 22:05:00	2.753	2016-11-12	11:05:00
KAIT	2016-11-11 22:06:00	2.757	2016-11-12	11:06:00
KAIT	2016-11-11 22:07:00	2.761	2016-11-12	11:07:00
KAIT	2016-11-11 22:08:00	2.763	2016-11-12	11:08:00
KAIT	2016-11-11 22:09:00	2.78	2016-11-12	11:09:00
KAIT	2016-11-11 22:10:00	2.798	2016-11-12	11:10:00
KAIT	2016-11-11 22:11:00	2.789	2016-11-12	11:11:00
KAIT	2016-11-11 22:12:00	2.789	2016-11-12	11:12:00
KAIT	2016-11-11 22:13:00	2.795	2016-11-12	11:13:00
KAIT	2016-11-11 22:14:00	2.798	2016-11-12	11:14:00
KAIT	2016-11-11 22:15:00	2.802	2016-11-12	11:15:00
KAIT	2016-11-11 22:16:00	2.814	2016-11-12	11:16:00
KAIT	2016-11-11 22:17:00	2.835	2016-11-12	11:17:00
KAIT	2016-11-11 22:18:00	2.84	2016-11-12	11:18:00
KAIT	2016-11-11 22:19:00	2.849	2016-11-12	11:19:00
KAIT	2016-11-11 22:20:00	2.847	2016-11-12	11:20:00
KAIT	2016-11-11 22:21:00	2.852	2016-11-12	11:21:00
KAIT	2016-11-11 22:22:00	2.855	2016-11-12	11:22:00
KAIT	2016-11-11 22:23:00	2.865	2016-11-12	11:23:00
KAIT	2016-11-11 22:24:00	2.874	2016-11-12	11:24:00
KAIT	2016-11-11 22:25:00	2.878	2016-11-12	11:25:00
KAIT	2016-11-11 22:26:00	2.868	2016-11-12	11:26:00
KAIT	2016-11-11 22:27:00	2.877	2016-11-12	11:27:00
KAIT	2016-11-11 22:28:00	2.88	2016-11-12	11:28:00
KAIT	2016-11-11 22:29:00	2.897	2016-11-12	11:29:00
KAIT	2016-11-11 22:30:00	2.892	2016-11-12	11:30:00
KAIT	2016-11-11 22:31:00	2.904	2016-11-12	11:31:00
KAIT	2016-11-11 22:32:00	2.908	2016-11-12	11:32:00
KAIT	2016-11-11 22:33:00	2.911	2016-11-12	11:33:00
KAIT	2016-11-11 22:34:00	2.913	2016-11-12	11:34:00
KAIT	2016-11-11 22:35:00	2.923	2016-11-12	11:35:00
KAIT	2016-11-11 22:36:00	2.914	2016-11-12	11:36:00
KAIT	2016-11-11 22:37:00	2.935	2016-11-12	11:37:00
KAIT	2016-11-11 22:38:00	2.935	2016-11-12	11:38:00
KAIT	2016-11-11 22:39:00	2.947	2016-11-12	11:39:00
KAIT	2016-11-11 22:40:00	2.945	2016-11-12	11:40:00
KAIT	2016-11-11 22:41:00	2.958	2016-11-12	11:41:00
KAIT	2016-11-11 22:42:00	2.968	2016-11-12	11:42:00
KAIT	2016-11-11 22:43:00	2.98	2016-11-12	11:43:00
KAIT	2016-11-11 22:44:00	2.988	2016-11-12	11:44:00
KAIT	2016-11-11 22:45:00	2.991	2016-11-12	11:45:00
KAIT	2016-11-11 22:46:00	2.997	2016-11-12	11:46:00
KAIT	2016-11-11 22:47:00	3.002	2016-11-12	11:47:00
KAIT	2016-11-11 22:48:00	3.002	2016-11-12	11:48:00
KAIT	2016-11-11 22:49:00	3.017	2016-11-12	11:49:00
KAIT	2016-11-11 22:50:00	3.017	2016-11-12	11:50:00
KAIT	2016-11-11 22:51:00	3.038	2016-11-12	11:51:00
KAIT	2016-11-11 22:52:00	3.03	2016-11-12	11:52:00
KAIT	2016-11-11 22:53:00	3.038	2016-11-12	11:53:00
KAIT	2016-11-11 22:54:00	3.036	2016-11-12	11:54:00
KAIT	2016-11-11 22:55:00	3.045	2016-11-12	11:55:00
KAIT	2016-11-11 22:56:00	3.054	2016-11-12	11:56:00
KAIT	2016-11-11 22:57:00	3.057	2016-11-12	11:57:00
KAIT	2016-11-11 22:58:00	3.061	2016-11-12	11:58:00
KAIT	2016-11-11 22:59:00	3.069	2016-11-12	11:59:00
KAIT	2016-11-11 23:00:00	3.073	2016-11-12	12:00:00
KAIT	2016-11-11 23:01:00	3.088	2016-11-12	12:01:00
KAIT	2016-11-11 23:02:00	3.087	2016-11-12	12:02:00
KAIT	2016-11-11 23:03:00	3.092	2016-11-12	12:03:00
KAIT	2016-11-11 23:04:00	3.098	2016-11-12	12:04:00
KAIT	2016-11-11 23:05:00	3.111	2016-11-12	12:05:00
KAIT	2016-11-11 23:06:00	3.109	2016-11-12	12:06:00
KAIT	2016-11-11 23:07:00	3.12	2016-11-12	12:07:00
KAIT	2016-11-11 23:08:00	3.116	2016-11-12	12:08:00
KAIT	2016-11-11 23:09:00	3.124	2016-11-12	12:09:00
KAIT	2016-11-11 23:10:00	3.127	2016-11-12	12:10:00
KAIT	2016-11-11 23:11:00	3.129	2016-11-12	12:11:00
KAIT	2016-11-11 23:12:00	3.155	2016-11-12	12:12:00
KAIT	2016-11-11 23:13:00	3.158	2016-11-12	12:13:00
KAIT	2016-11-11 23:14:00	3.17	2016-11-12	12:14:00
KAIT	2016-11-11 23:15:00	3.174	2016-11-12	12:15:00
KAIT	2016-11-11 23:16:00	3.194	2016-11-12	12:16:00
KAIT	2016-11-11 23:17:00	3.199	2016-11-12	12:17:00
KAIT	2016-11-11 23:18:00	3.203	2016-11-12	12:18:00
KAIT	2016-11-11 23:19:00	3.203	2016-11-12	12:19:00
KAIT	2016-11-11 23:20:00	3.216	2016-11-12	12:20:00
KAIT	2016-11-11 23:21:00	3.229	2016-11-12	12:21:00
KAIT	2016-11-11 23:22:00	3.226	2016-11-12	12:22:00
KAIT	2016-11-11 23:23:00	3.225	2016-11-12	12:23:00
KAIT	2016-11-11 23:24:00	3.238	2016-11-12	12:24:00
KAIT	2016-11-11 23:25:00	3.234	2016-11-12	12:25:00
KAIT	2016-11-11 23:26:00	3.239	2016-11-12	12:26:00
KAIT	2016-11-11 23:27:00	3.247	2016-11-12	12:27:00
KAIT	2016-11-11 23:28:00	3.26	2016-11-12	12:28:00
KAIT	2016-11-11 23:29:00	3.262	2016-11-12	12:29:00
KAIT	2016-11-11 23:30:00	3.267	2016-11-12	12:30:00
KAIT	2016-11-11 23:31:00	3.279	2016-11-12	12:31:00
KAIT	2016-11-11 23:32:00	3.291	2016-11-12	12:32:00
KAIT	2016-11-11 23:33:00	3.301	2016-11-12	12:33:00
KAIT	2016-11-11 23:34:00	3.309	2016-11-12	12:34:00
KAIT	2016-11-11 23:35:00	3.31	2016-11-12	12:35:00
KAIT	2016-11-11 23:36:00	3.31	2016-11-12	12:36:00
KAIT	2016-11-11 23:37:00	3.322	2016-11-12	12:37:00
KAIT	2016-11-11 23:38:00	3.326	2016-11-12	12:38:00
KAIT	2016-11-11 23:39:00	3.334	2016-11-12	12:39:00
KAIT	2016-11-11 23:40:00	3.332	2016-11-12	12:40:00
KAIT	2016-11-11 23:41:00	3.353	2016-11-12	12:41:00
KAIT	2016-11-11 23:42:00	3.349	2016-11-12	12:42:00
KAIT	2016-11-11 23:43:00	3.359	2016-11-12	12:43:00
KAIT	2016-11-11 23:44:00	3.341	2016-11-12	12:44:00
KAIT	2016-11-11 23:45:00	3.355	2016-11-12	12:45:00
KAIT	2016-11-11 23:46:00	3.359	2016-11-12	12:46:00
KAIT	2016-11-11 23:47:00	3.376	2016-11-12	12:47:00
KAIT	2016-11-11 23:48:00	3.38	2016-11-12	12:48:00
KAIT	2016-11-11 23:49:00	3.397	2016-11-12	12:49:00
KAIT	2016-11-11 23:50:00	3.397	2016-11-12	12:50:00
KAIT	2016-11-11 23:51:00	3.403	2016-11-12	12:51:00
KAIT	2016-11-11 23:52:00	3.41	2016-11-12	12:52:00
KAIT	2016-11-11 23:53:00	3.412	2016-11-12	12:53:00
KAIT	2016-11-11 23:54:00	3.431	2016-11-12	12:54:00
KAIT	2016-11-11 23:55:00	3.425	2016-11-12	12:55:00
KAIT	2016-11-11 23:56:00	3.435	2016-11-12	12:56:00
KAIT	2016-11-11 23:57:00	3.438	2016-11-12	12:57:00
KAIT	2016-11-11 23:58:00	3.451	2016-11-12	12:58:00
KAIT	2016-11-11 23:59:00	3.449	2016-11-12	12:59:00
KAIT	2016-11-12	3.448	2016-11-12	13:00:00
KAIT	2016-11-12 00:01:00	3.452	2016-11-12	13:01:00
KAIT	2016-11-12 00:02:00	3.455	2016-11-12	13:02:00
KAIT	2016-11-12 00:03:00	3.463	2016-11-12	13:03:00
KAIT	2016-11-12 00:04:00	3.463	2016-11-12	13:04:00
KAIT	2016-11-12 00:05:00	3.462	2016-11-12	13:05:00
KAIT	2016-11-12 00:06:00	3.49	2016-11-12	13:06:00
KAIT	2016-11-12 00:07:00	3.496	2016-11-12	13:07:00
KAIT	2016-11-12 00:08:00	3.503	2016-11-12	13:08:00
KAIT	2016-11-12 00:09:00	3.505	2016-11-12	13:09:00
KAIT	2016-11-12 00:10:00	3.53	2016-11-12	13:10:00
KAIT	2016-11-12 00:11:00	3.519	2016-11-12	13:11:00
KAIT	2016-11-12 00:12:00	3.515	2016-11-12	13:12:00
KAIT	2016-11-12 00:13:00	3.507	2016-11-12	13:13:00
KAIT	2016-11-12 00:14:00	3.508	2016-11-12	13:14:00
KAIT	2016-11-12 00:15:00	3.504	2016-11-12	13:15:00
KAIT	2016-11-12 00:16:00	3.511	2016-11-12	13:16:00
KAIT	2016-11-12 00:17:00	3.514	2016-11-12	13:17:00
KAIT	2016-11-12 00:18:00	3.537	2016-11-12	13:18:00
KAIT	2016-11-12 00:19:00	3.541	2016-11-12	13:19:00
KAIT	2016-11-12 00:20:00	3.558	2016-11-12	13:20:00
KAIT	2016-11-12 00:21:00	3.549	2016-11-12	13:21:00
KAIT	2016-11-12 00:22:00	3.566	2016-11-12	13:22:00
KAIT	2016-11-12 00:23:00	3.571	2016-11-12	13:23:00
KAIT	2016-11-12 00:24:00	3.577	2016-11-12	13:24:00
KAIT	2016-11-12 00:25:00	3.584	2016-11-12	13:25:00
KAIT	2016-11-12 00:26:00	3.579	2016-11-12	13:26:00
KAIT	2016-11-12 00:27:00	3.594	2016-11-12	13:27:00
KAIT	2016-11-12 00:28:00	3.596	2016-11-12	13:28:00
KAIT	2016-11-12 00:29:00	3.616	2016-11-12	13:29:00
KAIT	2016-11-12 00:30:00	3.627	2016-11-12	13:30:00
KAIT	2016-11-12 00:31:00	3.629	2016-11-12	13:31:00
KAIT	2016-11-12 00:32:00	3.638	2016-11-12	13:32:00
KAIT	2016-11-12 00:33:00	3.64	2016-11-12	13:33:00
KAIT	2016-11-12 00:34:00	3.625	2016-11-12	13:34:00
KAIT	2016-11-12 00:35:00	3.639	2016-11-12	13:35:00
KAIT	2016-11-12 00:36:00	3.624	2016-11-12	13:36:00
KAIT	2016-11-12 00:37:00	3.636	2016-11-12	13:37:00
KAIT	2016-11-12 00:38:00	3.643	2016-11-12	13:38:00
KAIT	2016-11-12 00:39:00	3.661	2016-11-12	13:39:00
KAIT	2016-11-12 00:40:00	3.665	2016-11-12	13:40:00
KAIT	2016-11-12 00:41:00	3.672	2016-11-12	13:41:00
KAIT	2016-11-12 00:42:00	3.674	2016-11-12	13:42:00
KAIT	2016-11-12 00:43:00	3.674	2016-11-12	13:43:00
KAIT	2016-11-12 00:44:00	3.678	2016-11-12	13:44:00
KAIT	2016-11-12 00:45:00	3.688	2016-11-12	13:45:00
KAIT	2016-11-12 00:46:00	3.67	2016-11-12	13:46:00
KAIT	2016-11-12 00:47:00	3.675	2016-11-12	13:47:00
KAIT	2016-11-12 00:48:00	3.676	2016-11-12	13:48:00
KAIT	2016-11-12 00:49:00	3.678	2016-11-12	13:49:00
KAIT	2016-11-12 00:50:00	3.672	2016-11-12	13:50:00
KAIT	2016-11-12 00:51:00	3.681	2016-11-12	13:51:00
KAIT	2016-11-12 00:52:00	3.682	2016-11-12	13:52:00
KAIT	2016-11-12 00:53:00	3.668	2016-11-12	13:53:00
KAIT	2016-11-12 00:54:00	3.671	2016-11-12	13:54:00
KAIT	2016-11-12 00:55:00	3.691	2016-11-12	13:55:00
KAIT	2016-11-12 00:56:00	3.69	2016-11-12	13:56:00
KAIT	2016-11-12 00:57:00	3.696	2016-11-12	13:57:00
KAIT	2016-11-12 00:58:00	3.72	2016-11-12	13:58:00
KAIT	2016-11-12 00:59:00	3.712	2016-11-12	13:59:00
KAIT	2016-11-12 01:00:00	3.723	2016-11-12	14:00:00
KAIT	2016-11-12 01:01:00	3.738	2016-11-12	14:01:00
KAIT	2016-11-12 01:02:00	3.75	2016-11-12	14:02:00
KAIT	2016-11-12 01:03:00	3.746	2016-11-12	14:03:00
KAIT	2016-11-12 01:04:00	3.737	2016-11-12	14:04:00
KAIT	2016-11-12 01:05:00	3.739	2016-11-12	14:05:00
KAIT	2016-11-12 01:06:00	3.748	2016-11-12	14:06:00
KAIT	2016-11-12 01:07:00	3.758	2016-11-12	14:07:00
KAIT	2016-11-12 01:08:00	3.753	2016-11-12	14:08:00
KAIT	2016-11-12 01:09:00	3.768	2016-11-12	14:09:00
KAIT	2016-11-12 01:10:00	3.774	2016-11-12	14:10:00
KAIT	2016-11-12 01:11:00	3.755	2016-11-12	14:11:00
KAIT	2016-11-12 01:12:00	3.764	2016-11-12	14:12:00
KAIT	2016-11-12 01:13:00	3.769	2016-11-12	14:13:00
KAIT	2016-11-12 01:14:00	3.782	2016-11-12	14:14:00
KAIT	2016-11-12 01:15:00	3.775	2016-11-12	14:15:00
KAIT	2016-11-12 01:16:00	3.793	2016-11-12	14:16:00
KAIT	2016-11-12 01:17:00	3.806	2016-11-12	14:17:00
KAIT	2016-11-12 01:18:00	3.818	2016-11-12	14:18:00
KAIT	2016-11-12 01:19:00	3.821	2016-11-12	14:19:00
KAIT	2016-11-12 01:20:00	3.815	2016-11-12	14:20:00
KAIT	2016-11-12 01:21:00	3.789	2016-11-12	14:21:00
KAIT	2016-11-12 01:22:00	3.809	2016-11-12	14:22:00
KAIT	2016-11-12 01:23:00	3.8	2016-11-12	14:23:00
KAIT	2016-11-12 01:24:00	3.789	2016-11-12	14:24:00
KAIT	2016-11-12 01:25:00	3.8	2016-11-12	14:25:00
KAIT	2016-11-12 01:26:00	3.797	2016-11-12	14:26:00
KAIT	2016-11-12 01:27:00	3.796	2016-11-12	14:27:00
KAIT	2016-11-12 01:28:00	3.804	2016-11-12	14:28:00
KAIT	2016-11-12 01:29:00	3.814	2016-11-12	14:29:00
KAIT	2016-11-12 01:30:00	3.809	2016-11-12	14:30:00
KAIT	2016-11-12 01:31:00	3.813	2016-11-12	14:31:00
KAIT	2016-11-12 01:32:00	3.828	2016-11-12	14:32:00
KAIT	2016-11-12 01:33:00	3.831	2016-11-12	14:33:00
KAIT	2016-11-12 01:34:00	3.834	2016-11-12	14:34:00
KAIT	2016-11-12 01:35:00	3.823	2016-11-12	14:35:00
KAIT	2016-11-12 01:36:00	3.85	2016-11-12	14:36:00
KAIT	2016-11-12 01:37:00	3.855	2016-11-12	14:37:00
KAIT	2016-11-12 01:38:00	3.826	2016-11-12	14:38:00
KAIT	2016-11-12 01:39:00	3.836	2016-11-12	14:39:00
KAIT	2016-11-12 01:40:00	3.845	2016-11-12	14:40:00
KAIT	2016-11-12 01:41:00	3.86	2016-11-12	14:41:00
KAIT	2016-11-12 01:42:00	3.856	2016-11-12	14:42:00
KAIT	2016-11-12 01:43:00	3.871	2016-11-12	14:43:00
KAIT	2016-11-12 01:44:00	3.869	2016-11-12	14:44:00
KAIT	2016-11-12 01:45:00	3.876	2016-11-12	14:45:00
KAIT	2016-11-12 01:46:00	3.882	2016-11-12	14:46:00
KAIT	2016-11-12 01:47:00	3.886	2016-11-12	14:47:00
KAIT	2016-11-12 01:48:00	3.873	2016-11-12	14:48:00
KAIT	2016-11-12 01:49:00	3.889	2016-11-12	14:49:00
KAIT	2016-11-12 01:50:00	3.874	2016-11-12	14:50:00
KAIT	2016-11-12 01:51:00	3.878	2016-11-12	14:51:00
KAIT	2016-11-12 01:52:00	3.878	2016-11-12	14:52:00
KAIT	2016-11-12 01:53:00	3.877	2016-11-12	14:53:00
KAIT	2016-11-12 01:54:00	3.873	2016-11-12	14:54:00
KAIT	2016-11-12 01:55:00	3.889	2016-11-12	14:55:00
KAIT	2016-11-12 01:56:00	3.875	2016-11-12	14:56:00
KAIT	2016-11-12 01:57:00	3.873	2016-11-12	14:57:00
KAIT	2016-11-12 01:58:00	3.874	2016-11-12	14:58:00
KAIT	2016-11-12 01:59:00	3.862	2016-11-12	14:59:00
KAIT	2016-11-12 02:00:00	3.855	2016-11-12	15:00:00
KAIT	2016-11-12 02:01:00	3.847	2016-11-12	15:01:00
KAIT	2016-11-12 02:02:00	3.861	2016-11-12	15:02:00
KAIT	2016-11-12 02:03:00	3.848	2016-11-12	15:03:00
KAIT	2016-11-12 02:04:00	3.837	2016-11-12	15:04:00
KAIT	2016-11-12 02:05:00	3.834	2016-11-12	15:05:00
KAIT	2016-11-12 02:06:00	3.846	2016-11-12	15:06:00
KAIT	2016-11-12 02:07:00	3.855	2016-11-12	15:07:00
KAIT	2016-11-12 02:08:00	3.867	2016-11-12	15:08:00
KAIT	2016-11-12 02:09:00	3.864	2016-11-12	15:09:00	HT 1.9
KAIT	2016-11-12 02:10:00	3.886	2016-11-12	15:10:00	Ave	SD
KAIT	2016-11-12 02:11:00	3.881	2016-11-12	15:11:00	3.85394	0.0252192
KAIT	2016-11-12 02:12:00	3.873	2016-11-12	15:12:00
KAIT	2016-11-12 02:13:00	3.873	2016-11-12	15:13:00
KAIT	2016-11-12 02:14:00	3.863	2016-11-12	15:14:00
KAIT	2016-11-12 02:15:00	3.864	2016-11-12	15:15:00
KAIT	2016-11-12 02:16:00	3.869	2016-11-12	15:16:00
KAIT	2016-11-12 02:17:00	3.874	2016-11-12	15:17:00
KAIT	2016-11-12 02:18:00	3.879	2016-11-12	15:18:00				1.9	3.9
KAIT	2016-11-12 02:19:00	3.884	2016-11-12	15:19:00
KAIT	2016-11-12 02:20:00	3.892	2016-11-12	15:20:00
KAIT	2016-11-12 02:21:00	3.875	2016-11-12	15:21:00
KAIT	2016-11-12 02:22:00	3.879	2016-11-12	15:22:00
KAIT	2016-11-12 02:23:00	3.89	2016-11-12	15:23:00
KAIT	2016-11-12 02:24:00	3.886	2016-11-12	15:24:00
KAIT	2016-11-12 02:25:00	3.861	2016-11-12	15:25:00
KAIT	2016-11-12 02:26:00	3.884	2016-11-12	15:26:00
KAIT	2016-11-12 02:27:00	3.878	2016-11-12	15:27:00
KAIT	2016-11-12 02:28:00	3.865	2016-11-12	15:28:00
KAIT	2016-11-12 02:29:00	3.882	2016-11-12	15:29:00
KAIT	2016-11-12 02:30:00	3.878	2016-11-12	15:30:00
KAIT	2016-11-12 02:31:00	3.883	2016-11-12	15:31:00
KAIT	2016-11-12 02:32:00	3.859	2016-11-12	15:32:00
KAIT	2016-11-12 02:33:00	3.851	2016-11-12	15:33:00
KAIT	2016-11-12 02:34:00	3.848	2016-11-12	15:34:00
KAIT	2016-11-12 02:35:00	3.843	2016-11-12	15:35:00
KAIT	2016-11-12 02:36:00	3.831	2016-11-12	15:36:00
KAIT	2016-11-12 02:37:00	3.821	2016-11-12	15:37:00
KAIT	2016-11-12 02:38:00	3.83	2016-11-12	15:38:00
KAIT	2016-11-12 02:39:00	3.832	2016-11-12	15:39:00
KAIT	2016-11-12 02:40:00	3.834	2016-11-12	15:40:00
KAIT	2016-11-12 02:41:00	3.83	2016-11-12	15:41:00
KAIT	2016-11-12 02:42:00	3.835	2016-11-12	15:42:00
KAIT	2016-11-12 02:43:00	3.854	2016-11-12	15:43:00
KAIT	2016-11-12 02:44:00	3.85	2016-11-12	15:44:00
KAIT	2016-11-12 02:45:00	3.845	2016-11-12	15:45:00
KAIT	2016-11-12 02:46:00	3.855	2016-11-12	15:46:00
KAIT	2016-11-12 02:47:00	3.849	2016-11-12	15:47:00
KAIT	2016-11-12 02:48:00	3.848	2016-11-12	15:48:00
KAIT	2016-11-12 02:49:00	3.835	2016-11-12	15:49:00
KAIT	2016-11-12 02:50:00	3.823	2016-11-12	15:50:00
KAIT	2016-11-12 02:51:00	3.822	2016-11-12	15:51:00
KAIT	2016-11-12 02:52:00	3.807	2016-11-12	15:52:00
KAIT	2016-11-12 02:53:00	3.81	2016-11-12	15:53:00
KAIT	2016-11-12 02:54:00	3.831	2016-11-12	15:54:00
KAIT	2016-11-12 02:55:00	3.835	2016-11-12	15:55:00
KAIT	2016-11-12 02:56:00	3.84	2016-11-12	15:56:00
KAIT	2016-11-12 02:57:00	3.828	2016-11-12	15:57:00
KAIT	2016-11-12 02:58:00	3.847	2016-11-12	15:58:00
KAIT	2016-11-12 02:59:00	3.842	2016-11-12	15:59:00
KAIT	2016-11-12 03:00:00	3.825	2016-11-12	16:00:00
KAIT	2016-11-12 03:01:00	3.819	2016-11-12	16:01:00
KAIT	2016-11-12 03:02:00	3.815	2016-11-12	16:02:00
KAIT	2016-11-12 03:03:00	3.799	2016-11-12	16:03:00
KAIT	2016-11-12 03:04:00	3.8	2016-11-12	16:04:00
KAIT	2016-11-12 03:05:00	3.82	2016-11-12	16:05:00
KAIT	2016-11-12 03:06:00	3.813	2016-11-12	16:06:00
KAIT	2016-11-12 03:07:00	3.802	2016-11-12	16:07:00
KAIT	2016-11-12 03:08:00	3.8	2016-11-12	16:08:00
KAIT	2016-11-12 03:09:00	3.791	2016-11-12	16:09:00
KAIT	2016-11-12 03:10:00	3.779	2016-11-12	16:10:00
KAIT	2016-11-12 03:11:00	3.78	2016-11-12	16:11:00
KAIT	2016-11-12 03:12:00	3.779	2016-11-12	16:12:00
KAIT	2016-11-12 03:13:00	3.774	2016-11-12	16:13:00
KAIT	2016-11-12 03:14:00	3.76	2016-11-12	16:14:00
KAIT	2016-11-12 03:15:00	3.751	2016-11-12	16:15:00
KAIT	2016-11-12 03:16:00	3.769	2016-11-12	16:16:00
KAIT	2016-11-12 03:17:00	3.75	2016-11-12	16:17:00
KAIT	2016-11-12 03:18:00	3.755	2016-11-12	16:18:00
KAIT	2016-11-12 03:19:00	3.762	2016-11-12	16:19:00
KAIT	2016-11-12 03:20:00	3.765	2016-11-12	16:20:00
KAIT	2016-11-12 03:21:00	3.762	2016-11-12	16:21:00
KAIT	2016-11-12 03:22:00	3.767	2016-11-12	16:22:00
KAIT	2016-11-12 03:23:00	3.746	2016-11-12	16:23:00
KAIT	2016-11-12 03:24:00	3.736	2016-11-12	16:24:00
KAIT	2016-11-12 03:25:00	3.723	2016-11-12	16:25:00
KAIT	2016-11-12 03:26:00	3.722	2016-11-12	16:26:00
KAIT	2016-11-12 03:27:00	3.696	2016-11-12	16:27:00
KAIT	2016-11-12 03:28:00	3.709	2016-11-12	16:28:00
KAIT	2016-11-12 03:29:00	3.706	2016-11-12	16:29:00
KAIT	2016-11-12 03:30:00	3.714	2016-11-12	16:30:00
KAIT	2016-11-12 03:31:00	3.708	2016-11-12	16:31:00
KAIT	2016-11-12 03:32:00	3.723	2016-11-12	16:32:00
KAIT	2016-11-12 03:33:00	3.738	2016-11-12	16:33:00
KAIT	2016-11-12 03:34:00	3.725	2016-11-12	16:34:00
KAIT	2016-11-12 03:35:00	3.719	2016-11-12	16:35:00
KAIT	2016-11-12 03:36:00	3.707	2016-11-12	16:36:00
KAIT	2016-11-12 03:37:00	3.709	2016-11-12	16:37:00
KAIT	2016-11-12 03:38:00	3.697	2016-11-12	16:38:00
KAIT	2016-11-12 03:39:00	3.688	2016-11-12	16:39:00
KAIT	2016-11-12 03:40:00	3.677	2016-11-12	16:40:00
KAIT	2016-11-12 03:41:00	3.675	2016-11-12	16:41:00
KAIT	2016-11-12 03:42:00	3.666	2016-11-12	16:42:00
KAIT	2016-11-12 03:43:00	3.674	2016-11-12	16:43:00
KAIT	2016-11-12 03:44:00	3.655	2016-11-12	16:44:00
KAIT	2016-11-12 03:45:00	3.65	2016-11-12	16:45:00
KAIT	2016-11-12 03:46:00	3.659	2016-11-12	16:46:00
KAIT	2016-11-12 03:47:00	3.65	2016-11-12	16:47:00
KAIT	2016-11-12 03:48:00	3.639	2016-11-12	16:48:00
KAIT	2016-11-12 03:49:00	3.648	2016-11-12	16:49:00
KAIT	2016-11-12 03:50:00	3.645	2016-11-12	16:50:00
KAIT	2016-11-12 03:51:00	3.627	2016-11-12	16:51:00
KAIT	2016-11-12 03:52:00	3.622	2016-11-12	16:52:00
KAIT	2016-11-12 03:53:00	3.647	2016-11-12	16:53:00
KAIT	2016-11-12 03:54:00	3.642	2016-11-12	16:54:00
KAIT	2016-11-12 03:55:00	3.641	2016-11-12	16:55:00
KAIT	2016-11-12 03:56:00	3.614	2016-11-12	16:56:00
KAIT	2016-11-12 03:57:00	3.608	2016-11-12	16:57:00
KAIT	2016-11-12 03:58:00	3.6	2016-11-12	16:58:00
KAIT	2016-11-12 03:59:00	3.569	2016-11-12	16:59:00
KAIT	2016-11-12 04:00:00	3.56	2016-11-12	17:00:00
KAIT	2016-11-12 04:01:00	3.565	2016-11-12	17:01:00
KAIT	2016-11-12 04:02:00	3.552	2016-11-12	17:02:00
KAIT	2016-11-12 04:03:00	3.542	2016-11-12	17:03:00
KAIT	2016-11-12 04:04:00	3.535	2016-11-12	17:04:00
KAIT	2016-11-12 04:05:00	3.55	2016-11-12	17:05:00
KAIT	2016-11-12 04:06:00	3.556	2016-11-12	17:06:00
KAIT	2016-11-12 04:07:00	3.54	2016-11-12	17:07:00
KAIT	2016-11-12 04:08:00	3.528	2016-11-12	17:08:00
KAIT	2016-11-12 04:09:00	3.535	2016-11-12	17:09:00
KAIT	2016-11-12 04:10:00	3.537	2016-11-12	17:10:00
KAIT	2016-11-12 04:11:00	3.525	2016-11-12	17:11:00
KAIT	2016-11-12 04:12:00	3.519	2016-11-12	17:12:00
KAIT	2016-11-12 04:13:00	3.521	2016-11-12	17:13:00
KAIT	2016-11-12 04:14:00	3.503	2016-11-12	17:14:00
KAIT	2016-11-12 04:15:00	3.502	2016-11-12	17:15:00
KAIT	2016-11-12 04:16:00	3.505	2016-11-12	17:16:00
KAIT	2016-11-12 04:17:00	3.499	2016-11-12	17:17:00
KAIT	2016-11-12 04:18:00	3.484	2016-11-12	17:18:00
KAIT	2016-11-12 04:19:00	3.496	2016-11-12	17:19:00
KAIT	2016-11-12 04:20:00	3.478	2016-11-12	17:20:00
KAIT	2016-11-12 04:21:00	3.485	2016-11-12	17:21:00
KAIT	2016-11-12 04:22:00	3.496	2016-11-12	17:22:00
KAIT	2016-11-12 04:23:00	3.466	2016-11-12	17:23:00
KAIT	2016-11-12 04:24:00	3.48	2016-11-12	17:24:00
KAIT	2016-11-12 04:25:00	3.46	2016-11-12	17:25:00
KAIT	2016-11-12 04:26:00	3.463	2016-11-12	17:26:00
KAIT	2016-11-12 04:27:00	3.469	2016-11-12	17:27:00
KAIT	2016-11-12 04:28:00	3.458	2016-11-12	17:28:00
KAIT	2016-11-12 04:29:00	3.446	2016-11-12	17:29:00
KAIT	2016-11-12 04:30:00	3.431	2016-11-12	17:30:00
KAIT	2016-11-12 04:31:00	3.425	2016-11-12	17:31:00
KAIT	2016-11-12 04:32:00	3.403	2016-11-12	17:32:00
KAIT	2016-11-12 04:33:00	3.39	2016-11-12	17:33:00
KAIT	2016-11-12 04:34:00	3.371	2016-11-12	17:34:00
KAIT	2016-11-12 04:35:00	3.35	2016-11-12	17:35:00
KAIT	2016-11-12 04:36:00	3.369	2016-11-12	17:36:00
KAIT	2016-11-12 04:37:00	3.37	2016-11-12	17:37:00
KAIT	2016-11-12 04:38:00	3.359	2016-11-12	17:38:00
KAIT	2016-11-12 04:39:00	3.33	2016-11-12	17:39:00
KAIT	2016-11-12 04:40:00	3.341	2016-11-12	17:40:00
KAIT	2016-11-12 04:41:00	3.35	2016-11-12	17:41:00
KAIT	2016-11-12 04:42:00	3.347	2016-11-12	17:42:00
KAIT	2016-11-12 04:43:00	3.345	2016-11-12	17:43:00
KAIT	2016-11-12 04:44:00	3.339	2016-11-12	17:44:00
KAIT	2016-11-12 04:45:00	3.334	2016-11-12	17:45:00
KAIT	2016-11-12 04:46:00	3.33	2016-11-12	17:46:00
KAIT	2016-11-12 04:47:00	3.32	2016-11-12	17:47:00
KAIT	2016-11-12 04:48:00	3.329	2016-11-12	17:48:00
KAIT	2016-11-12 04:49:00	3.322	2016-11-12	17:49:00
KAIT	2016-11-12 04:50:00	3.315	2016-11-12	17:50:00
KAIT	2016-11-12 04:51:00	3.299	2016-11-12	17:51:00
KAIT	2016-11-12 04:52:00	3.285	2016-11-12	17:52:00
KAIT	2016-11-12 04:53:00	3.292	2016-11-12	17:53:00
KAIT	2016-11-12 04:54:00	3.277	2016-11-12	17:54:00
KAIT	2016-11-12 04:55:00	3.285	2016-11-12	17:55:00
KAIT	2016-11-12 04:56:00	3.269	2016-11-12	17:56:00
KAIT	2016-11-12 04:57:00	3.269	2016-11-12	17:57:00
KAIT	2016-11-12 04:58:00	3.247	2016-11-12	17:58:00
KAIT	2016-11-12 04:59:00	3.251	2016-11-12	17:59:00
KAIT	2016-11-12 05:00:00	3.256	2016-11-12	18:00:00
KAIT	2016-11-12 05:01:00	3.241	2016-11-12	18:01:00
KAIT	2016-11-12 05:02:00	3.245	2016-11-12	18:02:00
KAIT	2016-11-12 05:03:00	3.25	2016-11-12	18:03:00
KAIT	2016-11-12 05:04:00	3.226	2016-11-12	18:04:00
KAIT	2016-11-12 05:05:00	3.212	2016-11-12	18:05:00
KAIT	2016-11-12 05:06:00	3.212	2016-11-12	18:06:00
KAIT	2016-11-12 05:07:00	3.193	2016-11-12	18:07:00
KAIT	2016-11-12 05:08:00	3.174	2016-11-12	18:08:00
KAIT	2016-11-12 05:09:00	3.166	2016-11-12	18:09:00
KAIT	2016-11-12 05:10:00	3.159	2016-11-12	18:10:00
KAIT	2016-11-12 05:11:00	3.17	2016-11-12	18:11:00
KAIT	2016-11-12 05:12:00	3.155	2016-11-12	18:12:00
KAIT	2016-11-12 05:13:00	3.171	2016-11-12	18:13:00
KAIT	2016-11-12 05:14:00	3.168	2016-11-12	18:14:00
KAIT	2016-11-12 05:15:00	3.148	2016-11-12	18:15:00
KAIT	2016-11-12 05:16:00	3.169	2016-11-12	18:16:00
KAIT	2016-11-12 05:17:00	3.141	2016-11-12	18:17:00
KAIT	2016-11-12 05:18:00	3.155	2016-11-12	18:18:00
KAIT	2016-11-12 05:19:00	3.151	2016-11-12	18:19:00
KAIT	2016-11-12 05:20:00	3.141	2016-11-12	18:20:00
KAIT	2016-11-12 05:21:00	3.136	2016-11-12	18:21:00
KAIT	2016-11-12 05:22:00	3.124	2016-11-12	18:22:00
KAIT	2016-11-12 05:23:00	3.117	2016-11-12	18:23:00
KAIT	2016-11-12 05:24:00	3.114	2016-11-12	18:24:00
KAIT	2016-11-12 05:25:00	3.113	2016-11-12	18:25:00
KAIT	2016-11-12 05:26:00	3.092	2016-11-12	18:26:00
KAIT	2016-11-12 05:27:00	3.09	2016-11-12	18:27:00
KAIT	2016-11-12 05:28:00	3.088	2016-11-12	18:28:00
KAIT	2016-11-12 05:29:00	3.077	2016-11-12	18:29:00
KAIT	2016-11-12 05:30:00	3.089	2016-11-12	18:30:00
KAIT	2016-11-12 05:31:00	3.063	2016-11-12	18:31:00
KAIT	2016-11-12 05:32:00	3.052	2016-11-12	18:32:00
KAIT	2016-11-12 05:33:00	3.046	2016-11-12	18:33:00
KAIT	2016-11-12 05:34:00	3.023	2016-11-12	18:34:00
KAIT	2016-11-12 05:35:00	3.019	2016-11-12	18:35:00
KAIT	2016-11-12 05:36:00	3.035	2016-11-12	18:36:00
KAIT	2016-11-12 05:37:00	3.006	2016-11-12	18:37:00
KAIT	2016-11-12 05:38:00	2.995	2016-11-12	18:38:00
KAIT	2016-11-12 05:39:00	2.976	2016-11-12	18:39:00
KAIT	2016-11-12 05:40:00	2.991	2016-11-12	18:40:00
KAIT	2016-11-12 05:41:00	2.952	2016-11-12	18:41:00
KAIT	2016-11-12 05:42:00	2.959	2016-11-12	18:42:00
KAIT	2016-11-12 05:43:00	2.948	2016-11-12	18:43:00
KAIT	2016-11-12 05:44:00	2.961	2016-11-12	18:44:00
KAIT	2016-11-12 05:45:00	2.942	2016-11-12	18:45:00
KAIT	2016-11-12 05:46:00	2.948	2016-11-12	18:46:00
KAIT	2016-11-12 05:47:00	2.95	2016-11-12	18:47:00
KAIT	2016-11-12 05:48:00	2.941	2016-11-12	18:48:00
KAIT	2016-11-12 05:49:00	2.936	2016-11-12	18:49:00
KAIT	2016-11-12 05:50:00	2.956	2016-11-12	18:50:00
KAIT	2016-11-12 05:51:00	2.95	2016-11-12	18:51:00
KAIT	2016-11-12 05:52:00	2.936	2016-11-12	18:52:00
KAIT	2016-11-12 05:53:00	2.924	2016-11-12	18:53:00
KAIT	2016-11-12 05:54:00	2.919	2016-11-12	18:54:00
KAIT	2016-11-12 05:55:00	2.914	2016-11-12	18:55:00
KAIT	2016-11-12 05:56:00	2.895	2016-11-12	18:56:00
KAIT	2016-11-12 05:57:00	2.892	2016-11-12	18:57:00
KAIT	2016-11-12 05:58:00	2.879	2016-11-12	18:58:00
KAIT	2016-11-12 05:59:00	2.867	2016-11-12	18:59:00
KAIT	2016-11-12 06:00:00	2.874	2016-11-12	19:00:00
KAIT	2016-11-12 06:01:00	2.864	2016-11-12	19:01:00
KAIT	2016-11-12 06:02:00	2.853	2016-11-12	19:02:00
KAIT	2016-11-12 06:03:00	2.848	2016-11-12	19:03:00
KAIT	2016-11-12 06:04:00	2.859	2016-11-12	19:04:00
KAIT	2016-11-12 06:05:00	2.863	2016-11-12	19:05:00
KAIT	2016-11-12 06:06:00	2.839	2016-11-12	19:06:00
KAIT	2016-11-12 06:07:00	2.837	2016-11-12	19:07:00
KAIT	2016-11-12 06:08:00	2.82	2016-11-12	19:08:00
KAIT	2016-11-12 06:09:00	2.827	2016-11-12	19:09:00
KAIT	2016-11-12 06:10:00	2.831	2016-11-12	19:10:00
KAIT	2016-11-12 06:11:00	2.81	2016-11-12	19:11:00
KAIT	2016-11-12 06:12:00	2.8	2016-11-12	19:12:00
KAIT	2016-11-12 06:13:00	2.798	2016-11-12	19:13:00
KAIT	2016-11-12 06:14:00	2.778	2016-11-12	19:14:00
KAIT	2016-11-12 06:15:00	2.777	2016-11-12	19:15:00
KAIT	2016-11-12 06:16:00	2.775	2016-11-12	19:16:00
KAIT	2016-11-12 06:17:00	2.754	2016-11-12	19:17:00
KAIT	2016-11-12 06:18:00	2.742	2016-11-12	19:18:00
KAIT	2016-11-12 06:19:00	2.727	2016-11-12	19:19:00
KAIT	2016-11-12 06:20:00	2.734	2016-11-12	19:20:00
KAIT	2016-11-12 06:21:00	2.72	2016-11-12	19:21:00
KAIT	2016-11-12 06:22:00	2.719	2016-11-12	19:22:00
KAIT	2016-11-12 06:23:00	2.7	2016-11-12	19:23:00
KAIT	2016-11-12 06:24:00	2.709	2016-11-12	19:24:00
KAIT	2016-11-12 06:25:00	2.707	2016-11-12	19:25:00
KAIT	2016-11-12 06:26:00	2.7	2016-11-12	19:26:00
KAIT	2016-11-12 06:27:00	2.69	2016-11-12	19:27:00
KAIT	2016-11-12 06:28:00	2.682	2016-11-12	19:28:00
KAIT	2016-11-12 06:29:00	2.683	2016-11-12	19:29:00
KAIT	2016-11-12 06:30:00	2.68	2016-11-12	19:30:00
KAIT	2016-11-12 06:31:00	2.684	2016-11-12	19:31:00
KAIT	2016-11-12 06:32:00	2.678	2016-11-12	19:32:00
KAIT	2016-11-12 06:33:00	2.671	2016-11-12	19:33:00
KAIT	2016-11-12 06:34:00	2.66	2016-11-12	19:34:00
KAIT	2016-11-12 06:35:00	2.661	2016-11-12	19:35:00
KAIT	2016-11-12 06:36:00	2.671	2016-11-12	19:36:00
KAIT	2016-11-12 06:37:00	2.661	2016-11-12	19:37:00
KAIT	2016-11-12 06:38:00	2.669	2016-11-12	19:38:00
KAIT	2016-11-12 06:39:00	2.663	2016-11-12	19:39:00
KAIT	2016-11-12 06:40:00	2.661	2016-11-12	19:40:00
KAIT	2016-11-12 06:41:00	2.675	2016-11-12	19:41:00
KAIT	2016-11-12 06:42:00	2.655	2016-11-12	19:42:00
KAIT	2016-11-12 06:43:00	2.656	2016-11-12	19:43:00
KAIT	2016-11-12 06:44:00	2.664	2016-11-12	19:44:00
KAIT	2016-11-12 06:45:00	2.638	2016-11-12	19:45:00
KAIT	2016-11-12 06:46:00	2.622	2016-11-12	19:46:00
KAIT	2016-11-12 06:47:00	2.606	2016-11-12	19:47:00
KAIT	2016-11-12 06:48:00	2.607	2016-11-12	19:48:00
KAIT	2016-11-12 06:49:00	2.595	2016-11-12	19:49:00
KAIT	2016-11-12 06:50:00	2.566	2016-11-12	19:50:00
KAIT	2016-11-12 06:51:00	2.555	2016-11-12	19:51:00
KAIT	2016-11-12 06:52:00	2.551	2016-11-12	19:52:00
KAIT	2016-11-12 06:53:00	2.547	2016-11-12	19:53:00
KAIT	2016-11-12 06:54:00	2.539	2016-11-12	19:54:00
KAIT	2016-11-12 06:55:00	2.536	2016-11-12	19:55:00
KAIT	2016-11-12 06:56:00	2.539	2016-11-12	19:56:00
KAIT	2016-11-12 06:57:00	2.529	2016-11-12	19:57:00
KAIT	2016-11-12 06:58:00	2.524	2016-11-12	19:58:00
KAIT	2016-11-12 06:59:00	2.523	2016-11-12	19:59:00
KAIT	2016-11-12 07:00:00	2.526	2016-11-12	20:00:00
KAIT	2016-11-12 07:01:00	2.528	2016-11-12	20:01:00
KAIT	2016-11-12 07:02:00	2.529	2016-11-12	20:02:00
KAIT	2016-11-12 07:03:00	2.527	2016-11-12	20:03:00
KAIT	2016-11-12 07:04:00	2.532	2016-11-12	20:04:00
KAIT	2016-11-12 07:05:00	2.529	2016-11-12	20:05:00
KAIT	2016-11-12 07:06:00	2.528	2016-11-12	20:06:00
KAIT	2016-11-12 07:07:00	2.513	2016-11-12	20:07:00
KAIT	2016-11-12 07:08:00	2.531	2016-11-12	20:08:00
KAIT	2016-11-12 07:09:00	2.508	2016-11-12	20:09:00
KAIT	2016-11-12 07:10:00	2.521	2016-11-12	20:10:00
KAIT	2016-11-12 07:11:00	2.494	2016-11-12	20:11:00
KAIT	2016-11-12 07:12:00	2.506	2016-11-12	20:12:00
KAIT	2016-11-12 07:13:00	2.507	2016-11-12	20:13:00
KAIT	2016-11-12 07:14:00	2.491	2016-11-12	20:14:00
KAIT	2016-11-12 07:15:00	2.499	2016-11-12	20:15:00
KAIT	2016-11-12 07:16:00	2.504	2016-11-12	20:16:00
KAIT	2016-11-12 07:17:00	2.505	2016-11-12	20:17:00
KAIT	2016-11-12 07:18:00	2.487	2016-11-12	20:18:00
KAIT	2016-11-12 07:19:00	2.482	2016-11-12	20:19:00
KAIT	2016-11-12 07:20:00	2.496	2016-11-12	20:20:00
KAIT	2016-11-12 07:21:00	2.466	2016-11-12	20:21:00
KAIT	2016-11-12 07:22:00	2.456	2016-11-12	20:22:00
KAIT	2016-11-12 07:23:00	2.451	2016-11-12	20:23:00
KAIT	2016-11-12 07:24:00	2.461	2016-11-12	20:24:00
KAIT	2016-11-12 07:25:00	2.421	2016-11-12	20:25:00
KAIT	2016-11-12 07:26:00	2.399	2016-11-12	20:26:00
KAIT	2016-11-12 07:27:00	2.43	2016-11-12	20:27:00
KAIT	2016-11-12 07:28:00	2.4	2016-11-12	20:28:00
KAIT	2016-11-12 07:29:00	2.418	2016-11-12	20:29:00
KAIT	2016-11-12 07:30:00	2.425	2016-11-12	20:30:00
KAIT	2016-11-12 07:31:00	2.421	2016-11-12	20:31:00
KAIT	2016-11-12 07:32:00	2.434	2016-11-12	20:32:00
KAIT	2016-11-12 07:33:00	2.434	2016-11-12	20:33:00
KAIT	2016-11-12 07:34:00	2.428	2016-11-12	20:34:00
KAIT	2016-11-12 07:35:00	2.417	2016-11-12	20:35:00
KAIT	2016-11-12 07:36:00	2.424	2016-11-12	20:36:00
KAIT	2016-11-12 07:37:00	2.419	2016-11-12	20:37:00
KAIT	2016-11-12 07:38:00	2.435	2016-11-12	20:38:00
KAIT	2016-11-12 07:39:00	2.408	2016-11-12	20:39:00
KAIT	2016-11-12 07:40:00	2.408	2016-11-12	20:40:00
KAIT	2016-11-12 07:41:00	2.406	2016-11-12	20:41:00
KAIT	2016-11-12 07:42:00	2.411	2016-11-12	20:42:00
KAIT	2016-11-12 07:43:00	2.394	2016-11-12	20:43:00
KAIT	2016-11-12 07:44:00	2.404	2016-11-12	20:44:00
KAIT	2016-11-12 07:45:00	2.385	2016-11-12	20:45:00
KAIT	2016-11-12 07:46:00	2.363	2016-11-12	20:46:00
KAIT	2016-11-12 07:47:00	2.356	2016-11-12	20:47:00
KAIT	2016-11-12 07:48:00	2.368	2016-11-12	20:48:00
KAIT	2016-11-12 07:49:00	2.376	2016-11-12	20:49:00
KAIT	2016-11-12 07:50:00	2.36	2016-11-12	20:50:00
KAIT	2016-11-12 07:51:00	2.354	2016-11-12	20:51:00
KAIT	2016-11-12 07:52:00	2.365	2016-11-12	20:52:00
KAIT	2016-11-12 07:53:00	2.387	2016-11-12	20:53:00
KAIT	2016-11-12 07:54:00	2.378	2016-11-12	20:54:00
KAIT	2016-11-12 07:55:00	2.378	2016-11-12	20:55:00
KAIT	2016-11-12 07:56:00	2.374	2016-11-12	20:56:00
KAIT	2016-11-12 07:57:00	2.374	2016-11-12	20:57:00
KAIT	2016-11-12 07:58:00	2.374	2016-11-12	20:58:00
KAIT	2016-11-12 07:59:00	2.365	2016-11-12	20:59:00
KAIT	2016-11-12 08:00:00	2.358	2016-11-12	21:00:00
KAIT	2016-11-12 08:01:00	2.344	2016-11-12	21:01:00
KAIT	2016-11-12 08:02:00	2.346	2016-11-12	21:02:00
KAIT	2016-11-12 08:03:00	2.339	2016-11-12	21:03:00
KAIT	2016-11-12 08:04:00	2.352	2016-11-12	21:04:00
KAIT	2016-11-12 08:05:00	2.341	2016-11-12	21:05:00
KAIT	2016-11-12 08:06:00	2.347	2016-11-12	21:06:00
KAIT	2016-11-12 08:07:00	2.344	2016-11-12	21:07:00
KAIT	2016-11-12 08:08:00	2.358	2016-11-12	21:08:00
KAIT	2016-11-12 08:09:00	2.363	2016-11-12	21:09:00
KAIT	2016-11-12 08:10:00	2.331	2016-11-12	21:10:00
KAIT	2016-11-12 08:11:00	2.332	2016-11-12	21:11:00
KAIT	2016-11-12 08:12:00	2.333	2016-11-12	21:12:00
KAIT	2016-11-12 08:13:00	2.329	2016-11-12	21:13:00
KAIT	2016-11-12 08:14:00	2.313	2016-11-12	21:14:00
KAIT	2016-11-12 08:15:00	2.325	2016-11-12	21:15:00
KAIT	2016-11-12 08:16:00	2.331	2016-11-12	21:16:00
KAIT	2016-11-12 08:17:00	2.317	2016-11-12	21:17:00
KAIT	2016-11-12 08:18:00	2.32	2016-11-12	21:18:00
KAIT	2016-11-12 08:19:00	2.324	2016-11-12	21:19:00
KAIT	2016-11-12 08:20:00	2.328	2016-11-12	21:20:00
KAIT	2016-11-12 08:21:00	2.331	2016-11-12	21:21:00
KAIT	2016-11-12 08:22:00	2.316	2016-11-12	21:22:00
KAIT	2016-11-12 08:23:00	2.329	2016-11-12	21:23:00	LT 0.3
KAIT	2016-11-12 08:24:00	2.346	2016-11-12	21:24:00	Ave	SD
KAIT	2016-11-12 08:25:00	2.317	2016-11-12	21:25:00	2.34512	0.0240075
KAIT	2016-11-12 08:26:00	2.34	2016-11-12	21:26:00
KAIT	2016-11-12 08:27:00	2.326	2016-11-12	21:27:00
KAIT	2016-11-12 08:28:00	2.324	2016-11-12	21:28:00
KAIT	2016-11-12 08:29:00	2.323	2016-11-12	21:29:00
KAIT	2016-11-12 08:30:00	2.333	2016-11-12	21:30:00				0.3	2.3
KAIT	2016-11-12 08:31:00	2.33	2016-11-12	21:31:00
KAIT	2016-11-12 08:32:00	2.334	2016-11-12	21:32:00
KAIT	2016-11-12 08:33:00	2.33	2016-11-12	21:33:00
KAIT	2016-11-12 08:34:00	2.336	2016-11-12	21:34:00
KAIT	2016-11-12 08:35:00	2.341	2016-11-12	21:35:00
KAIT	2016-11-12 08:36:00	2.329	2016-11-12	21:36:00
KAIT	2016-11-12 08:37:00	2.325	2016-11-12	21:37:00
KAIT	2016-11-12 08:38:00	2.327	2016-11-12	21:38:00
KAIT	2016-11-12 08:39:00	2.317	2016-11-12	21:39:00
KAIT	2016-11-12 08:40:00	2.325	2016-11-12	21:40:00
KAIT	2016-11-12 08:41:00	2.324	2016-11-12	21:41:00
KAIT	2016-11-12 08:42:00	2.336	2016-11-12	21:42:00
KAIT	2016-11-12 08:43:00	2.318	2016-11-12	21:43:00
KAIT	2016-11-12 08:44:00	2.316	2016-11-12	21:44:00
KAIT	2016-11-12 08:45:00	2.344	2016-11-12	21:45:00
KAIT	2016-11-12 08:46:00	2.336	2016-11-12	21:46:00
KAIT	2016-11-12 08:47:00	2.347	2016-11-12	21:47:00
KAIT	2016-11-12 08:48:00	2.335	2016-11-12	21:48:00
KAIT	2016-11-12 08:49:00	2.337	2016-11-12	21:49:00
KAIT	2016-11-12 08:50:00	2.327	2016-11-12	21:50:00
KAIT	2016-11-12 08:51:00	2.343	2016-11-12	21:51:00
KAIT	2016-11-12 08:52:00	2.342	2016-11-12	21:52:00
KAIT	2016-11-12 08:53:00	2.334	2016-11-12	21:53:00
KAIT	2016-11-12 08:54:00	2.345	2016-11-12	21:54:00
KAIT	2016-11-12 08:55:00	2.334	2016-11-12	21:55:00
KAIT	2016-11-12 08:56:00	2.325	2016-11-12	21:56:00
KAIT	2016-11-12 08:57:00	2.324	2016-11-12	21:57:00
KAIT	2016-11-12 08:58:00	2.327	2016-11-12	21:58:00
KAIT	2016-11-12 08:59:00	2.333	2016-11-12	21:59:00
KAIT	2016-11-12 09:00:00	2.319	2016-11-12	22:00:00
KAIT	2016-11-12 09:01:00	2.328	2016-11-12	22:01:00
KAIT	2016-11-12 09:02:00	2.35	2016-11-12	22:02:00
KAIT	2016-11-12 09:03:00	2.336	2016-11-12	22:03:00
KAIT	2016-11-12 09:04:00	2.357	2016-11-12	22:04:00
KAIT	2016-11-12 09:05:00	2.335	2016-11-12	22:05:00
KAIT	2016-11-12 09:06:00	2.36	2016-11-12	22:06:00
KAIT	2016-11-12 09:07:00	2.362	2016-11-12	22:07:00
KAIT	2016-11-12 09:08:00	2.367	2016-11-12	22:08:00
KAIT	2016-11-12 09:09:00	2.35	2016-11-12	22:09:00
KAIT	2016-11-12 09:10:00	2.367	2016-11-12	22:10:00
KAIT	2016-11-12 09:11:00	2.39	2016-11-12	22:11:00
KAIT	2016-11-12 09:12:00	2.396	2016-11-12	22:12:00
KAIT	2016-11-12 09:13:00	2.395	2016-11-12	22:13:00
KAIT	2016-11-12 09:14:00	2.395	2016-11-12	22:14:00
KAIT	2016-11-12 09:15:00	2.398	2016-11-12	22:15:00
KAIT	2016-11-12 09:16:00	2.38	2016-11-12	22:16:00
KAIT	2016-11-12 09:17:00	2.387	2016-11-12	22:17:00
KAIT	2016-11-12 09:18:00	2.393	2016-11-12	22:18:00
KAIT	2016-11-12 09:19:00	2.369	2016-11-12	22:19:00
KAIT	2016-11-12 09:20:00	2.389	2016-11-12	22:20:00
KAIT	2016-11-12 09:21:00	2.398	2016-11-12	22:21:00
KAIT	2016-11-12 09:22:00	2.391	2016-11-12	22:22:00
KAIT	2016-11-12 09:23:00	2.396	2016-11-12	22:23:00
KAIT	2016-11-12 09:24:00	2.407	2016-11-12	22:24:00
KAIT	2016-11-12 09:25:00	2.432	2016-11-12	22:25:00
KAIT	2016-11-12 09:26:00	2.426	2016-11-12	22:26:00
KAIT	2016-11-12 09:27:00	2.413	2016-11-12	22:27:00
KAIT	2016-11-12 09:28:00	2.425	2016-11-12	22:28:00
KAIT	2016-11-12 09:29:00	2.427	2016-11-12	22:29:00
KAIT	2016-11-12 09:30:00	2.435	2016-11-12	22:30:00
KAIT	2016-11-12 09:31:00	2.432	2016-11-12	22:31:00
KAIT	2016-11-12 09:32:00	2.41	2016-11-12	22:32:00
KAIT	2016-11-12 09:33:00	2.421	2016-11-12	22:33:00
KAIT	2016-11-12 09:34:00	2.43	2016-11-12	22:34:00
KAIT	2016-11-12 09:35:00	2.441	2016-11-12	22:35:00
KAIT	2016-11-12 09:36:00	2.442	2016-11-12	22:36:00
KAIT	2016-11-12 09:37:00	2.429	2016-11-12	22:37:00
KAIT	2016-11-12 09:38:00	2.449	2016-11-12	22:38:00
KAIT	2016-11-12 09:39:00	2.482	2016-11-12	22:39:00
KAIT	2016-11-12 09:40:00	2.448	2016-11-12	22:40:00
KAIT	2016-11-12 09:41:00	2.449	2016-11-12	22:41:00
KAIT	2016-11-12 09:42:00	2.471	2016-11-12	22:42:00
KAIT	2016-11-12 09:43:00	2.456	2016-11-12	22:43:00
KAIT	2016-11-12 09:44:00	2.482	2016-11-12	22:44:00
KAIT	2016-11-12 09:45:00	2.474	2016-11-12	22:45:00
KAIT	2016-11-12 09:46:00	2.471	2016-11-12	22:46:00
KAIT	2016-11-12 09:47:00	2.466	2016-11-12	22:47:00
KAIT	2016-11-12 09:48:00	2.482	2016-11-12	22:48:00
KAIT	2016-11-12 09:49:00	2.482	2016-11-12	22:49:00
KAIT	2016-11-12 09:50:00	2.499	2016-11-12	22:50:00
KAIT	2016-11-12 09:51:00	2.5	2016-11-12	22:51:00
KAIT	2016-11-12 09:52:00	2.517	2016-11-12	22:52:00
KAIT	2016-11-12 09:53:00	2.531	2016-11-12	22:53:00
KAIT	2016-11-12 09:54:00	2.521	2016-11-12	22:54:00
KAIT	2016-11-12 09:55:00	2.54	2016-11-12	22:55:00
KAIT	2016-11-12 09:56:00	2.541	2016-11-12	22:56:00
KAIT	2016-11-12 09:57:00	2.557	2016-11-12	22:57:00
KAIT	2016-11-12 09:58:00	2.549	2016-11-12	22:58:00
KAIT	2016-11-12 09:59:00	2.565	2016-11-12	22:59:00
KAIT	2016-11-12 10:00:00	2.573	2016-11-12	23:00:00
KAIT	2016-11-12 10:01:00	2.576	2016-11-12	23:01:00
KAIT	2016-11-12 10:02:00	2.575	2016-11-12	23:02:00
KAIT	2016-11-12 10:03:00	2.585	2016-11-12	23:03:00
KAIT	2016-11-12 10:04:00	2.595	2016-11-12	23:04:00
KAIT	2016-11-12 10:05:00	2.595	2016-11-12	23:05:00
KAIT	2016-11-12 10:06:00	2.599	2016-11-12	23:06:00
KAIT	2016-11-12 10:07:00	2.579	2016-11-12	23:07:00
KAIT	2016-11-12 10:08:00	2.593	2016-11-12	23:08:00
KAIT	2016-11-12 10:09:00	2.589	2016-11-12	23:09:00
KAIT	2016-11-12 10:10:00	2.612	2016-11-12	23:10:00
KAIT	2016-11-12 10:11:00	2.594	2016-11-12	23:11:00
KAIT	2016-11-12 10:12:00	2.584	2016-11-12	23:12:00
KAIT	2016-11-12 10:13:00	2.588	2016-11-12	23:13:00
KAIT	2016-11-12 10:14:00	2.604	2016-11-12	23:14:00
KAIT	2016-11-12 10:15:00	2.601	2016-11-12	23:15:00
KAIT	2016-11-12 10:16:00	2.604	2016-11-12	23:16:00
KAIT	2016-11-12 10:17:00	2.62	2016-11-12	23:17:00
KAIT	2016-11-12 10:18:00	2.613	2016-11-12	23:18:00
KAIT	2016-11-12 10:19:00	2.616	2016-11-12	23:19:00
KAIT	2016-11-12 10:20:00	2.638	2016-11-12	23:20:00
KAIT	2016-11-12 10:21:00	2.638	2016-11-12	23:21:00
KAIT	2016-11-12 10:22:00	2.633	2016-11-12	23:22:00
KAIT	2016-11-12 10:23:00	2.653	2016-11-12	23:23:00
KAIT	2016-11-12 10:24:00	2.66	2016-11-12	23:24:00
KAIT	2016-11-12 10:25:00	2.648	2016-11-12	23:25:00
KAIT	2016-11-12 10:26:00	2.68	2016-11-12	23:26:00
KAIT	2016-11-12 10:27:00	2.696	2016-11-12	23:27:00
KAIT	2016-11-12 10:28:00	2.694	2016-11-12	23:28:00
KAIT	2016-11-12 10:29:00	2.716	2016-11-12	23:29:00
KAIT	2016-11-12 10:30:00	2.72	2016-11-12	23:30:00
KAIT	2016-11-12 10:31:00	2.707	2016-11-12	23:31:00
KAIT	2016-11-12 10:32:00	2.736	2016-11-12	23:32:00
KAIT	2016-11-12 10:33:00	2.712	2016-11-12	23:33:00
KAIT	2016-11-12 10:34:00	2.718	2016-11-12	23:34:00
KAIT	2016-11-12 10:35:00	2.727	2016-11-12	23:35:00
KAIT	2016-11-12 10:36:00	2.72	2016-11-12	23:36:00
KAIT	2016-11-12 10:37:00	2.733	2016-11-12	23:37:00
KAIT	2016-11-12 10:38:00	2.744	2016-11-12	23:38:00
KAIT	2016-11-12 10:39:00	2.762	2016-11-12	23:39:00
KAIT	2016-11-12 10:40:00	2.759	2016-11-12	23:40:00
KAIT	2016-11-12 10:41:00	2.768	2016-11-12	23:41:00
KAIT	2016-11-12 10:42:00	2.774	2016-11-12	23:42:00
KAIT	2016-11-12 10:43:00	2.789	2016-11-12	23:43:00
KAIT	2016-11-12 10:44:00	2.769	2016-11-12	23:44:00
KAIT	2016-11-12 10:45:00	2.776	2016-11-12	23:45:00
KAIT	2016-11-12 10:46:00	2.772	2016-11-12	23:46:00
KAIT	2016-11-12 10:47:00	2.785	2016-11-12	23:47:00
KAIT	2016-11-12 10:48:00	2.794	2016-11-12	23:48:00
KAIT	2016-11-12 10:49:00	2.809	2016-11-12	23:49:00
KAIT	2016-11-12 10:50:00	2.808	2016-11-12	23:50:00
KAIT	2016-11-12 10:51:00	2.805	2016-11-12	23:51:00
KAIT	2016-11-12 10:52:00	2.827	2016-11-12	23:52:00
KAIT	2016-11-12 10:53:00	2.849	2016-11-12	23:53:00
KAIT	2016-11-12 10:54:00	2.833	2016-11-12	23:54:00
KAIT	2016-11-12 10:55:00	2.861	2016-11-12	23:55:00
KAIT	2016-11-12 10:56:00	2.85	2016-11-12	23:56:00
KAIT	2016-11-12 10:57:00	2.852	2016-11-12	23:57:00
KAIT	2016-11-12 10:58:00	2.847	2016-11-12	23:58:00
KAIT	2016-11-12 10:59:00	2.854	2016-11-12	23:59:00
KAIT	2016-11-12 11:00:00	2.863	2016-11-13	1900-01-01
KAIT	2016-11-12 11:01:00	2.861	2016-11-13	00:01:00
KAIT	2016-11-12 11:02:00	2.885	2016-11-13	00:02:00
KAIT	2016-11-12 11:03:00	2.897	2016-11-13	00:03:00
KAIT	2016-11-12 11:04:00	2.873	2016-11-13	00:04:00
KAIT	2016-11-12 11:05:00	2.889	2016-11-13	00:05:00
KAIT	2016-11-12 11:06:00	2.914	2016-11-13	00:06:00
KAIT	2016-11-12 11:07:00	2.903	2016-11-13	00:07:00
KAIT	2016-11-12 11:08:00	2.934	2016-11-13	00:08:00
KAIT	2016-11-12 11:09:00	2.928	2016-11-13	00:09:00
KAIT	2016-11-12 11:10:00	2.93	2016-11-13	00:10:00
KAIT	2016-11-12 11:11:00	2.947	2016-11-13	00:11:00
KAIT	2016-11-12 11:12:00	2.947	2016-11-13	00:12:00
KAIT	2016-11-12 11:13:00	2.944	2016-11-13	00:13:00
KAIT	2016-11-12 11:14:00	2.949	2016-11-13	00:14:00
KAIT	2016-11-12 11:15:00	2.975	2016-11-13	00:15:00
KAIT	2016-11-12 11:16:00	2.962	2016-11-13	00:16:00
KAIT	2016-11-12 11:17:00	2.974	2016-11-13	00:17:00
KAIT	2016-11-12 11:18:00	2.967	2016-11-13	00:18:00
KAIT	2016-11-12 11:19:00	2.978	2016-11-13	00:19:00
KAIT	2016-11-12 11:20:00	3.001	2016-11-13	00:20:00
KAIT	2016-11-12 11:21:00	3.012	2016-11-13	00:21:00
KAIT	2016-11-12 11:22:00	3.011	2016-11-13	00:22:00
KAIT	2016-11-12 11:23:00	3.03	2016-11-13	00:23:00
KAIT	2016-11-12 11:24:00	3.016	2016-11-13	00:24:00
KAIT	2016-11-12 11:25:00	3.029	2016-11-13	00:25:00
KAIT	2016-11-12 11:26:00	3.037	2016-11-13	00:26:00
KAIT	2016-11-12 11:27:00	3.046	2016-11-13	00:27:00
KAIT	2016-11-12 11:28:00	3.047	2016-11-13	00:28:00
KAIT	2016-11-12 11:29:00	3.065	2016-11-13	00:29:00
KAIT	2016-11-12 11:30:00	3.069	2016-11-13	00:30:00
KAIT	2016-11-12 11:31:00	3.057	2016-11-13	00:31:00
KAIT	2016-11-12 11:32:00	3.072	2016-11-13	00:32:00
KAIT	2016-11-12 11:33:00	3.058	2016-11-13	00:33:00
KAIT	2016-11-12 11:34:00	3.068	2016-11-13	00:34:00
KAIT	2016-11-12 11:35:00	3.076	2016-11-13	00:35:00
KAIT	2016-11-12 11:36:00	3.081	2016-11-13	00:36:00
KAIT	2016-11-12 11:37:00	3.086	2016-11-13	00:37:00
KAIT	2016-11-12 11:38:00	3.092	2016-11-13	00:38:00
KAIT	2016-11-12 11:39:00	3.095	2016-11-13	00:39:00
KAIT	2016-11-12 11:40:00	3.093	2016-11-13	00:40:00
KAIT	2016-11-12 11:41:00	3.11	2016-11-13	00:41:00
KAIT	2016-11-12 11:42:00	3.129	2016-11-13	00:42:00
KAIT	2016-11-12 11:43:00	3.137	2016-11-13	00:43:00
KAIT	2016-11-12 11:44:00	3.125	2016-11-13	00:44:00
KAIT	2016-11-12 11:45:00	3.146	2016-11-13	00:45:00
KAIT	2016-11-12 11:46:00	3.161	2016-11-13	00:46:00
KAIT	2016-11-12 11:47:00	3.168	2016-11-13	00:47:00
KAIT	2016-11-12 11:48:00	3.183	2016-11-13	00:48:00
KAIT	2016-11-12 11:49:00	3.18	2016-11-13	00:49:00
KAIT	2016-11-12 11:50:00	3.177	2016-11-13	00:50:00
KAIT	2016-11-12 11:51:00	3.195	2016-11-13	00:51:00
KAIT	2016-11-12 11:52:00	3.201	2016-11-13	00:52:00
KAIT	2016-11-12 11:53:00	3.225	2016-11-13	00:53:00
KAIT	2016-11-12 11:54:00	3.248	2016-11-13	00:54:00
KAIT	2016-11-12 11:55:00	3.249	2016-11-13	00:55:00
KAIT	2016-11-12 11:56:00	3.252	2016-11-13	00:56:00
KAIT	2016-11-12 11:57:00	3.279	2016-11-13	00:57:00
KAIT	2016-11-12 11:58:00	3.279	2016-11-13	00:58:00
KAIT	2016-11-12 11:59:00	3.284	2016-11-13	00:59:00
KAIT	2016-11-12 12:00:00	3.273	2016-11-13	01:00:00
KAIT	2016-11-12 12:01:00	3.3	2016-11-13	01:01:00
KAIT	2016-11-12 12:02:00	3.278	2016-11-13	01:02:00
KAIT	2016-11-12 12:03:00	3.292	2016-11-13	01:03:00
KAIT	2016-11-12 12:04:00	3.284	2016-11-13	01:04:00
KAIT	2016-11-12 12:05:00	3.289	2016-11-13	01:05:00
KAIT	2016-11-12 12:06:00	3.284	2016-11-13	01:06:00
KAIT	2016-11-12 12:07:00	3.298	2016-11-13	01:07:00
KAIT	2016-11-12 12:08:00	3.293	2016-11-13	01:08:00
KAIT	2016-11-12 12:09:00	3.3	2016-11-13	01:09:00
KAIT	2016-11-12 12:10:00	3.3	2016-11-13	01:10:00
KAIT	2016-11-12 12:11:00	3.305	2016-11-13	01:11:00
KAIT	2016-11-12 12:12:00	3.306	2016-11-13	01:12:00
KAIT	2016-11-12 12:13:00	3.31	2016-11-13	01:13:00
KAIT	2016-11-12 12:14:00	3.337	2016-11-13	01:14:00
KAIT	2016-11-12 12:15:00	3.323	2016-11-13	01:15:00
KAIT	2016-11-12 12:16:00	3.332	2016-11-13	01:16:00
KAIT	2016-11-12 12:17:00	3.332	2016-11-13	01:17:00
KAIT	2016-11-12 12:18:00	3.366	2016-11-13	01:18:00
KAIT	2016-11-12 12:19:00	3.371	2016-11-13	01:19:00
KAIT	2016-11-12 12:20:00	3.404	2016-11-13	01:20:00
KAIT	2016-11-12 12:21:00	3.4	2016-11-13	01:21:00
KAIT	2016-11-12 12:22:00	3.446	2016-11-13	01:22:00
KAIT	2016-11-12 12:23:00	3.445	2016-11-13	01:23:00
KAIT	2016-11-12 12:24:00	3.457	2016-11-13	01:24:00
KAIT	2016-11-12 12:25:00	3.453	2016-11-13	01:25:00
KAIT	2016-11-12 12:26:00	3.448	2016-11-13	01:26:00
KAIT	2016-11-12 12:27:00	3.457	2016-11-13	01:27:00
KAIT	2016-11-12 12:28:00	3.459	2016-11-13	01:28:00
KAIT	2016-11-12 12:29:00	3.471	2016-11-13	01:29:00
KAIT	2016-11-12 12:30:00	3.466	2016-11-13	01:30:00
KAIT	2016-11-12 12:31:00	3.476	2016-11-13	01:31:00
KAIT	2016-11-12 12:32:00	3.466	2016-11-13	01:32:00
KAIT	2016-11-12 12:33:00	3.479	2016-11-13	01:33:00
KAIT	2016-11-12 12:34:00	3.481	2016-11-13	01:34:00
KAIT	2016-11-12 12:35:00	3.471	2016-11-13	01:35:00
KAIT	2016-11-12 12:36:00	3.479	2016-11-13	01:36:00
KAIT	2016-11-12 12:37:00	3.489	2016-11-13	01:37:00
KAIT	2016-11-12 12:38:00	3.5	2016-11-13	01:38:00
KAIT	2016-11-12 12:39:00	3.493	2016-11-13	01:39:00
KAIT	2016-11-12 12:40:00	3.499	2016-11-13	01:40:00
KAIT	2016-11-12 12:41:00	3.503	2016-11-13	01:41:00
KAIT	2016-11-12 12:42:00	3.505	2016-11-13	01:42:00
KAIT	2016-11-12 12:43:00	3.508	2016-11-13	01:43:00
KAIT	2016-11-12 12:44:00	3.52	2016-11-13	01:44:00
KAIT	2016-11-12 12:45:00	3.515	2016-11-13	01:45:00
KAIT	2016-11-12 12:46:00	3.515	2016-11-13	01:46:00
KAIT	2016-11-12 12:47:00	3.541	2016-11-13	01:47:00
KAIT	2016-11-12 12:48:00	3.524	2016-11-13	01:48:00
KAIT	2016-11-12 12:49:00	3.549	2016-11-13	01:49:00
KAIT	2016-11-12 12:50:00	3.55	2016-11-13	01:50:00
KAIT	2016-11-12 12:51:00	3.566	2016-11-13	01:51:00
KAIT	2016-11-12 12:52:00	3.571	2016-11-13	01:52:00
KAIT	2016-11-12 12:53:00	3.574	2016-11-13	01:53:00
KAIT	2016-11-12 12:54:00	3.574	2016-11-13	01:54:00
KAIT	2016-11-12 12:55:00	3.594	2016-11-13	01:55:00
KAIT	2016-11-12 12:56:00	3.606	2016-11-13	01:56:00
KAIT	2016-11-12 12:57:00	3.619	2016-11-13	01:57:00
KAIT	2016-11-12 12:58:00	3.63	2016-11-13	01:58:00
KAIT	2016-11-12 12:59:00	3.628	2016-11-13	01:59:00
KAIT	2016-11-12 13:00:00	3.647	2016-11-13	02:00:00
KAIT	2016-11-12 13:01:00	3.63	2016-11-13	02:01:00
KAIT	2016-11-12 13:02:00	3.627	2016-11-13	02:02:00
KAIT	2016-11-12 13:03:00	3.626	2016-11-13	02:03:00
KAIT	2016-11-12 13:04:00	3.639	2016-11-13	02:04:00
KAIT	2016-11-12 13:05:00	3.646	2016-11-13	02:05:00
KAIT	2016-11-12 13:06:00	3.644	2016-11-13	02:06:00
KAIT	2016-11-12 13:07:00	3.646	2016-11-13	02:07:00
KAIT	2016-11-12 13:08:00	3.667	2016-11-13	02:08:00
KAIT	2016-11-12 13:09:00	3.653	2016-11-13	02:09:00
KAIT	2016-11-12 13:10:00	3.663	2016-11-13	02:10:00
KAIT	2016-11-12 13:11:00	3.693	2016-11-13	02:11:00
KAIT	2016-11-12 13:12:00	3.686	2016-11-13	02:12:00
KAIT	2016-11-12 13:13:00	3.686	2016-11-13	02:13:00
KAIT	2016-11-12 13:14:00	3.699	2016-11-13	02:14:00
KAIT	2016-11-12 13:15:00	3.691	2016-11-13	02:15:00
KAIT	2016-11-12 13:16:00	3.679	2016-11-13	02:16:00
KAIT	2016-11-12 13:17:00	3.693	2016-11-13	02:17:00
KAIT	2016-11-12 13:18:00	3.683	2016-11-13	02:18:00
KAIT	2016-11-12 13:19:00	3.679	2016-11-13	02:19:00
KAIT	2016-11-12 13:20:00	3.694	2016-11-13	02:20:00
KAIT	2016-11-12 13:21:00	3.692	2016-11-13	02:21:00
KAIT	2016-11-12 13:22:00	3.693	2016-11-13	02:22:00
KAIT	2016-11-12 13:23:00	3.703	2016-11-13	02:23:00
KAIT	2016-11-12 13:24:00	3.704	2016-11-13	02:24:00
KAIT	2016-11-12 13:25:00	3.701	2016-11-13	02:25:00
KAIT	2016-11-12 13:26:00	3.707	2016-11-13	02:26:00
KAIT	2016-11-12 13:27:00	3.714	2016-11-13	02:27:00
KAIT	2016-11-12 13:28:00	3.729	2016-11-13	02:28:00
KAIT	2016-11-12 13:29:00	3.715	2016-11-13	02:29:00
KAIT	2016-11-12 13:30:00	3.742	2016-11-13	02:30:00
KAIT	2016-11-12 13:31:00	3.745	2016-11-13	02:31:00
KAIT	2016-11-12 13:32:00	3.756	2016-11-13	02:32:00
KAIT	2016-11-12 13:33:00	3.746	2016-11-13	02:33:00
KAIT	2016-11-12 13:34:00	3.761	2016-11-13	02:34:00
KAIT	2016-11-12 13:35:00	3.763	2016-11-13	02:35:00
KAIT	2016-11-12 13:36:00	3.763	2016-11-13	02:36:00
KAIT	2016-11-12 13:37:00	3.758	2016-11-13	02:37:00
KAIT	2016-11-12 13:38:00	3.785	2016-11-13	02:38:00
KAIT	2016-11-12 13:39:00	3.783	2016-11-13	02:39:00
KAIT	2016-11-12 13:40:00	3.783	2016-11-13	02:40:00
KAIT	2016-11-12 13:41:00	3.784	2016-11-13	02:41:00
KAIT	2016-11-12 13:42:00	3.795	2016-11-13	02:42:00
KAIT	2016-11-12 13:43:00	3.79	2016-11-13	02:43:00
KAIT	2016-11-12 13:44:00	3.795	2016-11-13	02:44:00
KAIT	2016-11-12 13:45:00	3.815	2016-11-13	02:45:00
KAIT	2016-11-12 13:46:00	3.818	2016-11-13	02:46:00
KAIT	2016-11-12 13:47:00	3.812	2016-11-13	02:47:00
KAIT	2016-11-12 13:48:00	3.814	2016-11-13	02:48:00
KAIT	2016-11-12 13:49:00	3.806	2016-11-13	02:49:00
KAIT	2016-11-12 13:50:00	3.799	2016-11-13	02:50:00
KAIT	2016-11-12 13:51:00	3.803	2016-11-13	02:51:00
KAIT	2016-11-12 13:52:00	3.798	2016-11-13	02:52:00
KAIT	2016-11-12 13:53:00	3.808	2016-11-13	02:53:00
KAIT	2016-11-12 13:54:00	3.798	2016-11-13	02:54:00
KAIT	2016-11-12 13:55:00	3.825	2016-11-13	02:55:00
KAIT	2016-11-12 13:56:00	3.798	2016-11-13	02:56:00
KAIT	2016-11-12 13:57:00	3.813	2016-11-13	02:57:00
KAIT	2016-11-12 13:58:00	3.804	2016-11-13	02:58:00
KAIT	2016-11-12 13:59:00	3.814	2016-11-13	02:59:00
KAIT	2016-11-12 14:00:00	3.819	2016-11-13	03:00:00
KAIT	2016-11-12 14:01:00	3.844	2016-11-13	03:01:00
KAIT	2016-11-12 14:02:00	3.819	2016-11-13	03:02:00
KAIT	2016-11-12 14:03:00	3.836	2016-11-13	03:03:00
KAIT	2016-11-12 14:04:00	3.83	2016-11-13	03:04:00
KAIT	2016-11-12 14:05:00	3.827	2016-11-13	03:05:00
KAIT	2016-11-12 14:06:00	3.841	2016-11-13	03:06:00
KAIT	2016-11-12 14:07:00	3.84	2016-11-13	03:07:00
KAIT	2016-11-12 14:08:00	3.856	2016-11-13	03:08:00
KAIT	2016-11-12 14:09:00	3.848	2016-11-13	03:09:00
KAIT	2016-11-12 14:10:00	3.843	2016-11-13	03:10:00
KAIT	2016-11-12 14:11:00	3.857	2016-11-13	03:11:00
KAIT	2016-11-12 14:12:00	3.859	2016-11-13	03:12:00
KAIT	2016-11-12 14:13:00	3.85	2016-11-13	03:13:00
KAIT	2016-11-12 14:14:00	3.846	2016-11-13	03:14:00
KAIT	2016-11-12 14:15:00	3.844	2016-11-13	03:15:00
KAIT	2016-11-12 14:16:00	3.854	2016-11-13	03:16:00
KAIT	2016-11-12 14:17:00	3.853	2016-11-13	03:17:00
KAIT	2016-11-12 14:18:00	3.856	2016-11-13	03:18:00
KAIT	2016-11-12 14:19:00	3.867	2016-11-13	03:19:00
KAIT	2016-11-12 14:20:00	3.868	2016-11-13	03:20:00
KAIT	2016-11-12 14:21:00	3.873	2016-11-13	03:21:00
KAIT	2016-11-12 14:22:00	3.879	2016-11-13	03:22:00
KAIT	2016-11-12 14:23:00	3.881	2016-11-13	03:23:00
KAIT	2016-11-12 14:24:00	3.881	2016-11-13	03:24:00
KAIT	2016-11-12 14:25:00	3.898	2016-11-13	03:25:00
KAIT	2016-11-12 14:26:00	3.884	2016-11-13	03:26:00
KAIT	2016-11-12 14:27:00	3.901	2016-11-13	03:27:00
KAIT	2016-11-12 14:28:00	3.869	2016-11-13	03:28:00
KAIT	2016-11-12 14:29:00	3.864	2016-11-13	03:29:00
KAIT	2016-11-12 14:30:00	3.869	2016-11-13	03:30:00
KAIT	2016-11-12 14:31:00	3.874	2016-11-13	03:31:00
KAIT	2016-11-12 14:32:00	3.858	2016-11-13	03:32:00
KAIT	2016-11-12 14:33:00	3.86	2016-11-13	03:33:00
KAIT	2016-11-12 14:34:00	3.872	2016-11-13	03:34:00
KAIT	2016-11-12 14:35:00	3.875	2016-11-13	03:35:00
KAIT	2016-11-12 14:36:00	3.864	2016-11-13	03:36:00
KAIT	2016-11-12 14:37:00	3.873	2016-11-13	03:37:00
KAIT	2016-11-12 14:38:00	3.873	2016-11-13	03:38:00
KAIT	2016-11-12 14:39:00	3.87	2016-11-13	03:39:00
KAIT	2016-11-12 14:40:00	3.867	2016-11-13	03:40:00	HT 1.9
KAIT	2016-11-12 14:41:00	3.87	2016-11-13	03:41:00	Ave	SD
KAIT	2016-11-12 14:42:00	3.865	2016-11-13	03:42:00	3.85606	0.0215298		1.9	3.9
KAIT	2016-11-12 14:43:00	3.865	2016-11-13	03:43:00
KAIT	2016-11-12 14:44:00	3.851	2016-11-13	03:44:00
KAIT	2016-11-12 14:45:00	3.866	2016-11-13	03:45:00
KAIT	2016-11-12 14:46:00	3.871	2016-11-13	03:46:00
KAIT	2016-11-12 14:47:00	3.884	2016-11-13	03:47:00
KAIT	2016-11-12 14:48:00	3.87	2016-11-13	03:48:00
KAIT	2016-11-12 14:49:00	3.876	2016-11-13	03:49:00
KAIT	2016-11-12 14:50:00	3.887	2016-11-13	03:50:00
KAIT	2016-11-12 14:51:00	3.893	2016-11-13	03:51:00
KAIT	2016-11-12 14:52:00	3.88	2016-11-13	03:52:00
KAIT	2016-11-12 14:53:00	3.89	2016-11-13	03:53:00
KAIT	2016-11-12 14:54:00	3.88	2016-11-13	03:54:00
KAIT	2016-11-12 14:55:00	3.892	2016-11-13	03:55:00
KAIT	2016-11-12 14:56:00	3.891	2016-11-13	03:56:00
KAIT	2016-11-12 14:57:00	3.875	2016-11-13	03:57:00
KAIT	2016-11-12 14:58:00	3.862	2016-11-13	03:58:00
KAIT	2016-11-12 14:59:00	3.864	2016-11-13	03:59:00
KAIT	2016-11-12 15:00:00	3.857	2016-11-13	04:00:00
KAIT	2016-11-12 15:01:00	3.858	2016-11-13	04:01:00
KAIT	2016-11-12 15:02:00	3.845	2016-11-13	04:02:00
KAIT	2016-11-12 15:03:00	3.848	2016-11-13	04:03:00
KAIT	2016-11-12 15:04:00	3.847	2016-11-13	04:04:00
KAIT	2016-11-12 15:05:00	3.829	2016-11-13	04:05:00
KAIT	2016-11-12 15:06:00	3.841	2016-11-13	04:06:00
KAIT	2016-11-12 15:07:00	3.832	2016-11-13	04:07:00
KAIT	2016-11-12 15:08:00	3.834	2016-11-13	04:08:00
KAIT	2016-11-12 15:09:00	3.857	2016-11-13	04:09:00
KAIT	2016-11-12 15:10:00	3.841	2016-11-13	04:10:00
KAIT	2016-11-12 15:11:00	3.856	2016-11-13	04:11:00
KAIT	2016-11-12 15:12:00	3.839	2016-11-13	04:12:00
KAIT	2016-11-12 15:13:00	3.855	2016-11-13	04:13:00
KAIT	2016-11-12 15:14:00	3.846	2016-11-13	04:14:00
KAIT	2016-11-12 15:15:00	3.858	2016-11-13	04:15:00
KAIT	2016-11-12 15:16:00	3.835	2016-11-13	04:16:00
KAIT	2016-11-12 15:17:00	3.843	2016-11-13	04:17:00
KAIT	2016-11-12 15:18:00	3.848	2016-11-13	04:18:00
KAIT	2016-11-12 15:19:00	3.833	2016-11-13	04:19:00
KAIT	2016-11-12 15:20:00	3.838	2016-11-13	04:20:00
KAIT	2016-11-12 15:21:00	3.841	2016-11-13	04:21:00
KAIT	2016-11-12 15:22:00	3.82	2016-11-13	04:22:00
KAIT	2016-11-12 15:23:00	3.838	2016-11-13	04:23:00
KAIT	2016-11-12 15:24:00	3.847	2016-11-13	04:24:00
KAIT	2016-11-12 15:25:00	3.845	2016-11-13	04:25:00
KAIT	2016-11-12 15:26:00	3.832	2016-11-13	04:26:00
KAIT	2016-11-12 15:27:00	3.826	2016-11-13	04:27:00
KAIT	2016-11-12 15:28:00	3.837	2016-11-13	04:28:00
KAIT	2016-11-12 15:29:00	3.834	2016-11-13	04:29:00
KAIT	2016-11-12 15:30:00	3.819	2016-11-13	04:30:00
KAIT	2016-11-12 15:31:00	3.818	2016-11-13	04:31:00
KAIT	2016-11-12 15:32:00	3.823	2016-11-13	04:32:00
KAIT	2016-11-12 15:33:00	3.81	2016-11-13	04:33:00
KAIT	2016-11-12 15:34:00	3.795	2016-11-13	04:34:00
KAIT	2016-11-12 15:35:00	3.807	2016-11-13	04:35:00
KAIT	2016-11-12 15:36:00	3.802	2016-11-13	04:36:00
KAIT	2016-11-12 15:37:00	3.783	2016-11-13	04:37:00
KAIT	2016-11-12 15:38:00	3.792	2016-11-13	04:38:00
KAIT	2016-11-12 15:39:00	3.804	2016-11-13	04:39:00
KAIT	2016-11-12 15:40:00	3.783	2016-11-13	04:40:00
KAIT	2016-11-12 15:41:00	3.784	2016-11-13	04:41:00
KAIT	2016-11-12 15:42:00	3.797	2016-11-13	04:42:00
KAIT	2016-11-12 15:43:00	3.788	2016-11-13	04:43:00
KAIT	2016-11-12 15:44:00	3.769	2016-11-13	04:44:00
KAIT	2016-11-12 15:45:00	3.768	2016-11-13	04:45:00
KAIT	2016-11-12 15:46:00	3.759	2016-11-13	04:46:00
KAIT	2016-11-12 15:47:00	3.759	2016-11-13	04:47:00
KAIT	2016-11-12 15:48:00	3.756	2016-11-13	04:48:00
KAIT	2016-11-12 15:49:00	3.734	2016-11-13	04:49:00
KAIT	2016-11-12 15:50:00	3.751	2016-11-13	04:50:00
KAIT	2016-11-12 15:51:00	3.736	2016-11-13	04:51:00
KAIT	2016-11-12 15:52:00	3.74	2016-11-13	04:52:00
KAIT	2016-11-12 15:53:00	3.732	2016-11-13	04:53:00
KAIT	2016-11-12 15:54:00	3.718	2016-11-13	04:54:00
KAIT	2016-11-12 15:55:00	3.723	2016-11-13	04:55:00
KAIT	2016-11-12 15:56:00	3.729	2016-11-13	04:56:00
KAIT	2016-11-12 15:57:00	3.724	2016-11-13	04:57:00
KAIT	2016-11-12 15:58:00	3.727	2016-11-13	04:58:00
KAIT	2016-11-12 15:59:00	3.741	2016-11-13	04:59:00
KAIT	2016-11-12 16:00:00	3.733	2016-11-13	05:00:00
KAIT	2016-11-12 16:01:00	3.71	2016-11-13	05:01:00
KAIT	2016-11-12 16:02:00	3.725	2016-11-13	05:02:00
KAIT	2016-11-12 16:03:00	3.718	2016-11-13	05:03:00
KAIT	2016-11-12 16:04:00	3.712	2016-11-13	05:04:00
KAIT	2016-11-12 16:05:00	3.685	2016-11-13	05:05:00
KAIT	2016-11-12 16:06:00	3.708	2016-11-13	05:06:00
KAIT	2016-11-12 16:07:00	3.694	2016-11-13	05:07:00
KAIT	2016-11-12 16:08:00	3.678	2016-11-13	05:08:00
KAIT	2016-11-12 16:09:00	3.683	2016-11-13	05:09:00
KAIT	2016-11-12 16:10:00	3.658	2016-11-13	05:10:00
KAIT	2016-11-12 16:11:00	3.652	2016-11-13	05:11:00
KAIT	2016-11-12 16:12:00	3.64	2016-11-13	05:12:00
KAIT	2016-11-12 16:13:00	3.647	2016-11-13	05:13:00
KAIT	2016-11-12 16:14:00	3.644	2016-11-13	05:14:00
KAIT	2016-11-12 16:15:00	3.644	2016-11-13	05:15:00
KAIT	2016-11-12 16:16:00	3.621	2016-11-13	05:16:00
KAIT	2016-11-12 16:17:00	3.621	2016-11-13	05:17:00
KAIT	2016-11-12 16:18:00	3.624	2016-11-13	05:18:00
KAIT	2016-11-12 16:19:00	3.609	2016-11-13	05:19:00
KAIT	2016-11-12 16:20:00	3.602	2016-11-13	05:20:00
KAIT	2016-11-12 16:21:00	3.587	2016-11-13	05:21:00
KAIT	2016-11-12 16:22:00	3.604	2016-11-13	05:22:00
KAIT	2016-11-12 16:23:00	3.586	2016-11-13	05:23:00
KAIT	2016-11-12 16:24:00	3.578	2016-11-13	05:24:00
KAIT	2016-11-12 16:25:00	3.592	2016-11-13	05:25:00
KAIT	2016-11-12 16:26:00	3.59	2016-11-13	05:26:00
KAIT	2016-11-12 16:27:00	3.595	2016-11-13	05:27:00
KAIT	2016-11-12 16:28:00	3.585	2016-11-13	05:28:00
KAIT	2016-11-12 16:29:00	3.579	2016-11-13	05:29:00
KAIT	2016-11-12 16:30:00	3.565	2016-11-13	05:30:00
KAIT	2016-11-12 16:31:00	3.567	2016-11-13	05:31:00
KAIT	2016-11-12 16:32:00	3.581	2016-11-13	05:32:00
KAIT	2016-11-12 16:33:00	3.575	2016-11-13	05:33:00
KAIT	2016-11-12 16:34:00	3.57	2016-11-13	05:34:00
KAIT	2016-11-12 16:35:00	3.557	2016-11-13	05:35:00
KAIT	2016-11-12 16:36:00	3.564	2016-11-13	05:36:00
KAIT	2016-11-12 16:37:00	3.552	2016-11-13	05:37:00
KAIT	2016-11-12 16:38:00	3.547	2016-11-13	05:38:00
KAIT	2016-11-12 16:39:00	3.523	2016-11-13	05:39:00
KAIT	2016-11-12 16:40:00	3.516	2016-11-13	05:40:00
KAIT	2016-11-12 16:41:00	3.516	2016-11-13	05:41:00
KAIT	2016-11-12 16:42:00	3.529	2016-11-13	05:42:00
KAIT	2016-11-12 16:43:00	3.512	2016-11-13	05:43:00
KAIT	2016-11-12 16:44:00	3.494	2016-11-13	05:44:00
KAIT	2016-11-12 16:45:00	3.486	2016-11-13	05:45:00
KAIT	2016-11-12 16:46:00	3.467	2016-11-13	05:46:00
KAIT	2016-11-12 16:47:00	3.47	2016-11-13	05:47:00
KAIT	2016-11-12 16:48:00	3.442	2016-11-13	05:48:00
KAIT	2016-11-12 16:49:00	3.427	2016-11-13	05:49:00
KAIT	2016-11-12 16:50:00	3.432	2016-11-13	05:50:00
KAIT	2016-11-12 16:51:00	3.427	2016-11-13	05:51:00
KAIT	2016-11-12 16:52:00	3.412	2016-11-13	05:52:00
KAIT	2016-11-12 16:53:00	3.426	2016-11-13	05:53:00
KAIT	2016-11-12 16:54:00	3.425	2016-11-13	05:54:00
KAIT	2016-11-12 16:55:00	3.397	2016-11-13	05:55:00
KAIT	2016-11-12 16:56:00	3.399	2016-11-13	05:56:00
KAIT	2016-11-12 16:57:00	3.404	2016-11-13	05:57:00
KAIT	2016-11-12 16:58:00	3.398	2016-11-13	05:58:00
KAIT	2016-11-12 16:59:00	3.386	2016-11-13	05:59:00
KAIT	2016-11-12 17:00:00	3.384	2016-11-13	06:00:00
KAIT	2016-11-12 17:01:00	3.386	2016-11-13	06:01:00
KAIT	2016-11-12 17:02:00	3.367	2016-11-13	06:02:00
KAIT	2016-11-12 17:03:00	3.376	2016-11-13	06:03:00
KAIT	2016-11-12 17:04:00	3.359	2016-11-13	06:04:00
KAIT	2016-11-12 17:05:00	3.364	2016-11-13	06:05:00
KAIT	2016-11-12 17:06:00	3.356	2016-11-13	06:06:00
KAIT	2016-11-12 17:07:00	3.364	2016-11-13	06:07:00
KAIT	2016-11-12 17:08:00	3.357	2016-11-13	06:08:00
KAIT	2016-11-12 17:09:00	3.348	2016-11-13	06:09:00
KAIT	2016-11-12 17:10:00	3.356	2016-11-13	06:10:00
KAIT	2016-11-12 17:11:00	3.346	2016-11-13	06:11:00
KAIT	2016-11-12 17:12:00	3.326	2016-11-13	06:12:00
KAIT	2016-11-12 17:13:00	3.327	2016-11-13	06:13:00
KAIT	2016-11-12 17:14:00	3.318	2016-11-13	06:14:00
KAIT	2016-11-12 17:15:00	3.303	2016-11-13	06:15:00
KAIT	2016-11-12 17:16:00	3.294	2016-11-13	06:16:00
KAIT	2016-11-12 17:17:00	3.295	2016-11-13	06:17:00
KAIT	2016-11-12 17:18:00	3.28	2016-11-13	06:18:00
KAIT	2016-11-12 17:19:00	3.266	2016-11-13	06:19:00
KAIT	2016-11-12 17:20:00	3.265	2016-11-13	06:20:00
KAIT	2016-11-12 17:21:00	3.266	2016-11-13	06:21:00
KAIT	2016-11-12 17:22:00	3.25	2016-11-13	06:22:00
KAIT	2016-11-12 17:23:00	3.239	2016-11-13	06:23:00
KAIT	2016-11-12 17:24:00	3.234	2016-11-13	06:24:00
KAIT	2016-11-12 17:25:00	3.236	2016-11-13	06:25:00
KAIT	2016-11-12 17:26:00	3.244	2016-11-13	06:26:00
KAIT	2016-11-12 17:27:00	3.224	2016-11-13	06:27:00
KAIT	2016-11-12 17:28:00	3.21	2016-11-13	06:28:00
KAIT	2016-11-12 17:29:00	3.198	2016-11-13	06:29:00
KAIT	2016-11-12 17:30:00	3.182	2016-11-13	06:30:00
KAIT	2016-11-12 17:31:00	3.174	2016-11-13	06:31:00
KAIT	2016-11-12 17:32:00	3.187	2016-11-13	06:32:00
KAIT	2016-11-12 17:33:00	3.173	2016-11-13	06:33:00
KAIT	2016-11-12 17:34:00	3.162	2016-11-13	06:34:00
KAIT	2016-11-12 17:35:00	3.176	2016-11-13	06:35:00
KAIT	2016-11-12 17:36:00	3.161	2016-11-13	06:36:00
KAIT	2016-11-12 17:37:00	3.14	2016-11-13	06:37:00
KAIT	2016-11-12 17:38:00	3.131	2016-11-13	06:38:00
KAIT	2016-11-12 17:39:00	3.141	2016-11-13	06:39:00
KAIT	2016-11-12 17:40:00	3.122	2016-11-13	06:40:00
KAIT	2016-11-12 17:41:00	3.127	2016-11-13	06:41:00
KAIT	2016-11-12 17:42:00	3.118	2016-11-13	06:42:00
KAIT	2016-11-12 17:43:00	3.114	2016-11-13	06:43:00
KAIT	2016-11-12 17:44:00	3.094	2016-11-13	06:44:00
KAIT	2016-11-12 17:45:00	3.09	2016-11-13	06:45:00
KAIT	2016-11-12 17:46:00	3.083	2016-11-13	06:46:00
KAIT	2016-11-12 17:47:00	3.072	2016-11-13	06:47:00
KAIT	2016-11-12 17:48:00	3.073	2016-11-13	06:48:00
KAIT	2016-11-12 17:49:00	3.078	2016-11-13	06:49:00
KAIT	2016-11-12 17:50:00	3.068	2016-11-13	06:50:00
KAIT	2016-11-12 17:51:00	3.057	2016-11-13	06:51:00
KAIT	2016-11-12 17:52:00	3.064	2016-11-13	06:52:00
KAIT	2016-11-12 17:53:00	3.052	2016-11-13	06:53:00
KAIT	2016-11-12 17:54:00	3.052	2016-11-13	06:54:00
KAIT	2016-11-12 17:55:00	3.033	2016-11-13	06:55:00
KAIT	2016-11-12 17:56:00	3.038	2016-11-13	06:56:00
KAIT	2016-11-12 17:57:00	3.018	2016-11-13	06:57:00
KAIT	2016-11-12 17:58:00	3.02	2016-11-13	06:58:00
KAIT	2016-11-12 17:59:00	3.015	2016-11-13	06:59:00
KAIT	2016-11-12 18:00:00	3.015	2016-11-13	07:00:00
KAIT	2016-11-12 18:01:00	2.998	2016-11-13	07:01:00
KAIT	2016-11-12 18:02:00	2.993	2016-11-13	07:02:00
KAIT	2016-11-12 18:03:00	2.99	2016-11-13	07:03:00
KAIT	2016-11-12 18:04:00	2.964	2016-11-13	07:04:00
KAIT	2016-11-12 18:05:00	2.964	2016-11-13	07:05:00
KAIT	2016-11-12 18:06:00	2.964	2016-11-13	07:06:00
KAIT	2016-11-12 18:07:00	2.946	2016-11-13	07:07:00
KAIT	2016-11-12 18:08:00	2.941	2016-11-13	07:08:00
KAIT	2016-11-12 18:09:00	2.921	2016-11-13	07:09:00
KAIT	2016-11-12 18:10:00	2.914	2016-11-13	07:10:00
KAIT	2016-11-12 18:11:00	2.913	2016-11-13	07:11:00
KAIT	2016-11-12 18:12:00	2.904	2016-11-13	07:12:00
KAIT	2016-11-12 18:13:00	2.893	2016-11-13	07:13:00
KAIT	2016-11-12 18:14:00	2.898	2016-11-13	07:14:00
KAIT	2016-11-12 18:15:00	2.868	2016-11-13	07:15:00
KAIT	2016-11-12 18:16:00	2.891	2016-11-13	07:16:00
KAIT	2016-11-12 18:17:00	2.875	2016-11-13	07:17:00
KAIT	2016-11-12 18:18:00	2.866	2016-11-13	07:18:00
KAIT	2016-11-12 18:19:00	2.872	2016-11-13	07:19:00
KAIT	2016-11-12 18:20:00	2.88	2016-11-13	07:20:00
KAIT	2016-11-12 18:21:00	2.878	2016-11-13	07:21:00
KAIT	2016-11-12 18:22:00	2.866	2016-11-13	07:22:00
KAIT	2016-11-12 18:23:00	2.867	2016-11-13	07:23:00
KAIT	2016-11-12 18:24:00	2.861	2016-11-13	07:24:00
KAIT	2016-11-12 18:25:00	2.86	2016-11-13	07:25:00
KAIT	2016-11-12 18:26:00	2.841	2016-11-13	07:26:00
KAIT	2016-11-12 18:27:00	2.83	2016-11-13	07:27:00
KAIT	2016-11-12 18:28:00	2.819	2016-11-13	07:28:00
KAIT	2016-11-12 18:29:00	2.828	2016-11-13	07:29:00
KAIT	2016-11-12 18:30:00	2.816	2016-11-13	07:30:00
KAIT	2016-11-12 18:31:00	2.805	2016-11-13	07:31:00
KAIT	2016-11-12 18:32:00	2.812	2016-11-13	07:32:00
KAIT	2016-11-12 18:33:00	2.805	2016-11-13	07:33:00
KAIT	2016-11-12 18:34:00	2.816	2016-11-13	07:34:00
KAIT	2016-11-12 18:35:00	2.801	2016-11-13	07:35:00
KAIT	2016-11-12 18:36:00	2.818	2016-11-13	07:36:00
KAIT	2016-11-12 18:37:00	2.799	2016-11-13	07:37:00
KAIT	2016-11-12 18:38:00	2.779	2016-11-13	07:38:00
KAIT	2016-11-12 18:39:00	2.767	2016-11-13	07:39:00
KAIT	2016-11-12 18:40:00	2.771	2016-11-13	07:40:00
KAIT	2016-11-12 18:41:00	2.741	2016-11-13	07:41:00
KAIT	2016-11-12 18:42:00	2.723	2016-11-13	07:42:00
KAIT	2016-11-12 18:43:00	2.725	2016-11-13	07:43:00
KAIT	2016-11-12 18:44:00	2.718	2016-11-13	07:44:00
KAIT	2016-11-12 18:45:00	2.725	2016-11-13	07:45:00
KAIT	2016-11-12 18:46:00	2.698	2016-11-13	07:46:00
KAIT	2016-11-12 18:47:00	2.712	2016-11-13	07:47:00
KAIT	2016-11-12 18:48:00	2.689	2016-11-13	07:48:00
KAIT	2016-11-12 18:49:00	2.697	2016-11-13	07:49:00
KAIT	2016-11-12 18:50:00	2.666	2016-11-13	07:50:00
KAIT	2016-11-12 18:51:00	2.661	2016-11-13	07:51:00
KAIT	2016-11-12 18:52:00	2.665	2016-11-13	07:52:00
KAIT	2016-11-12 18:53:00	2.661	2016-11-13	07:53:00
KAIT	2016-11-12 18:54:00	2.667	2016-11-13	07:54:00
KAIT	2016-11-12 18:55:00	2.669	2016-11-13	07:55:00
KAIT	2016-11-12 18:56:00	2.648	2016-11-13	07:56:00
KAIT	2016-11-12 18:57:00	2.663	2016-11-13	07:57:00
KAIT	2016-11-12 18:58:00	2.651	2016-11-13	07:58:00
KAIT	2016-11-12 18:59:00	2.631	2016-11-13	07:59:00
KAIT	2016-11-12 19:00:00	2.649	2016-11-13	08:00:00
KAIT	2016-11-12 19:01:00	2.621	2016-11-13	08:01:00
KAIT	2016-11-12 19:02:00	2.624	2016-11-13	08:02:00
KAIT	2016-11-12 19:03:00	2.615	2016-11-13	08:03:00
KAIT	2016-11-12 19:04:00	2.609	2016-11-13	08:04:00
KAIT	2016-11-12 19:05:00	2.607	2016-11-13	08:05:00
KAIT	2016-11-12 19:06:00	2.611	2016-11-13	08:06:00
KAIT	2016-11-12 19:07:00	2.605	2016-11-13	08:07:00
KAIT	2016-11-12 19:08:00	2.606	2016-11-13	08:08:00
KAIT	2016-11-12 19:09:00	2.619	2016-11-13	08:09:00
KAIT	2016-11-12 19:10:00	2.609	2016-11-13	08:10:00
KAIT	2016-11-12 19:11:00	2.604	2016-11-13	08:11:00
KAIT	2016-11-12 19:12:00	2.611	2016-11-13	08:12:00
KAIT	2016-11-12 19:13:00	2.585	2016-11-13	08:13:00
KAIT	2016-11-12 19:14:00	2.56	2016-11-13	08:14:00
KAIT	2016-11-12 19:15:00	2.585	2016-11-13	08:15:00
KAIT	2016-11-12 19:16:00	2.554	2016-11-13	08:16:00
KAIT	2016-11-12 19:17:00	2.543	2016-11-13	08:17:00
KAIT	2016-11-12 19:18:00	2.524	2016-11-13	08:18:00
KAIT	2016-11-12 19:19:00	2.522	2016-11-13	08:19:00
KAIT	2016-11-12 19:20:00	2.522	2016-11-13	08:20:00
KAIT	2016-11-12 19:21:00	2.505	2016-11-13	08:21:00
KAIT	2016-11-12 19:22:00	2.505	2016-11-13	08:22:00
KAIT	2016-11-12 19:23:00	2.517	2016-11-13	08:23:00
KAIT	2016-11-12 19:24:00	2.517	2016-11-13	08:24:00
KAIT	2016-11-12 19:25:00	2.502	2016-11-13	08:25:00
KAIT	2016-11-12 19:26:00	2.512	2016-11-13	08:26:00
KAIT	2016-11-12 19:27:00	2.462	2016-11-13	08:27:00
KAIT	2016-11-12 19:28:00	2.49	2016-11-13	08:28:00
KAIT	2016-11-12 19:29:00	2.482	2016-11-13	08:29:00
KAIT	2016-11-12 19:30:00	2.5	2016-11-13	08:30:00
KAIT	2016-11-12 19:31:00	2.485	2016-11-13	08:31:00
KAIT	2016-11-12 19:32:00	2.47	2016-11-13	08:32:00
KAIT	2016-11-12 19:33:00	2.496	2016-11-13	08:33:00
KAIT	2016-11-12 19:34:00	2.486	2016-11-13	08:34:00
KAIT	2016-11-12 19:35:00	2.474	2016-11-13	08:35:00
KAIT	2016-11-12 19:36:00	2.455	2016-11-13	08:36:00
KAIT	2016-11-12 19:37:00	2.463	2016-11-13	08:37:00
KAIT	2016-11-12 19:38:00	2.462	2016-11-13	08:38:00
KAIT	2016-11-12 19:39:00	2.446	2016-11-13	08:39:00
KAIT	2016-11-12 19:40:00	2.432	2016-11-13	08:40:00
KAIT	2016-11-12 19:41:00	2.427	2016-11-13	08:41:00
KAIT	2016-11-12 19:42:00	2.437	2016-11-13	08:42:00
KAIT	2016-11-12 19:43:00	2.414	2016-11-13	08:43:00
KAIT	2016-11-12 19:44:00	2.425	2016-11-13	08:44:00
KAIT	2016-11-12 19:45:00	2.427	2016-11-13	08:45:00
KAIT	2016-11-12 19:46:00	2.404	2016-11-13	08:46:00
KAIT	2016-11-12 19:47:00	2.413	2016-11-13	08:47:00
KAIT	2016-11-12 19:48:00	2.41	2016-11-13	08:48:00
KAIT	2016-11-12 19:49:00	2.417	2016-11-13	08:49:00
KAIT	2016-11-12 19:50:00	2.406	2016-11-13	08:50:00
KAIT	2016-11-12 19:51:00	2.398	2016-11-13	08:51:00
KAIT	2016-11-12 19:52:00	2.397	2016-11-13	08:52:00
KAIT	2016-11-12 19:53:00	2.399	2016-11-13	08:53:00
KAIT	2016-11-12 19:54:00	2.371	2016-11-13	08:54:00
KAIT	2016-11-12 19:55:00	2.373	2016-11-13	08:55:00
KAIT	2016-11-12 19:56:00	2.384	2016-11-13	08:56:00
KAIT	2016-11-12 19:57:00	2.377	2016-11-13	08:57:00
KAIT	2016-11-12 19:58:00	2.381	2016-11-13	08:58:00
KAIT	2016-11-12 19:59:00	2.384	2016-11-13	08:59:00
KAIT	2016-11-12 20:00:00	2.367	2016-11-13	09:00:00
KAIT	2016-11-12 20:01:00	2.385	2016-11-13	09:01:00
KAIT	2016-11-12 20:02:00	2.37	2016-11-13	09:02:00
KAIT	2016-11-12 20:03:00	2.372	2016-11-13	09:03:00
KAIT	2016-11-12 20:04:00	2.363	2016-11-13	09:04:00
KAIT	2016-11-12 20:05:00	2.359	2016-11-13	09:05:00
KAIT	2016-11-12 20:06:00	2.355	2016-11-13	09:06:00
KAIT	2016-11-12 20:07:00	2.36	2016-11-13	09:07:00
KAIT	2016-11-12 20:08:00	2.357	2016-11-13	09:08:00
KAIT	2016-11-12 20:09:00	2.36	2016-11-13	09:09:00
KAIT	2016-11-12 20:10:00	2.351	2016-11-13	09:10:00
KAIT	2016-11-12 20:11:00	2.334	2016-11-13	09:11:00
KAIT	2016-11-12 20:12:00	2.339	2016-11-13	09:12:00
KAIT	2016-11-12 20:13:00	2.327	2016-11-13	09:13:00
KAIT	2016-11-12 20:14:00	2.311	2016-11-13	09:14:00
KAIT	2016-11-12 20:15:00	2.313	2016-11-13	09:15:00
KAIT	2016-11-12 20:16:00	2.317	2016-11-13	09:16:00
KAIT	2016-11-12 20:17:00	2.313	2016-11-13	09:17:00
KAIT	2016-11-12 20:18:00	2.316	2016-11-13	09:18:00
KAIT	2016-11-12 20:19:00	2.292	2016-11-13	09:19:00
KAIT	2016-11-12 20:20:00	2.288	2016-11-13	09:20:00
KAIT	2016-11-12 20:21:00	2.294	2016-11-13	09:21:00
KAIT	2016-11-12 20:22:00	2.297	2016-11-13	09:22:00
KAIT	2016-11-12 20:23:00	2.297	2016-11-13	09:23:00
KAIT	2016-11-12 20:24:00	2.294	2016-11-13	09:24:00
KAIT	2016-11-12 20:25:00	2.294	2016-11-13	09:25:00
KAIT	2016-11-12 20:26:00	2.306	2016-11-13	09:26:00
KAIT	2016-11-12 20:27:00	2.305	2016-11-13	09:27:00
KAIT	2016-11-12 20:28:00	2.311	2016-11-13	09:28:00
KAIT	2016-11-12 20:29:00	2.296	2016-11-13	09:29:00
KAIT	2016-11-12 20:30:00	2.297	2016-11-13	09:30:00
KAIT	2016-11-12 20:31:00	2.298	2016-11-13	09:31:00
KAIT	2016-11-12 20:32:00	2.289	2016-11-13	09:32:00
KAIT	2016-11-12 20:33:00	2.29	2016-11-13	09:33:00
KAIT	2016-11-12 20:34:00	2.278	2016-11-13	09:34:00
KAIT	2016-11-12 20:35:00	2.282	2016-11-13	09:35:00
KAIT	2016-11-12 20:36:00	2.308	2016-11-13	09:36:00
KAIT	2016-11-12 20:37:00	2.305	2016-11-13	09:37:00
KAIT	2016-11-12 20:38:00	2.291	2016-11-13	09:38:00
KAIT	2016-11-12 20:39:00	2.295	2016-11-13	09:39:00
KAIT	2016-11-12 20:40:00	2.294	2016-11-13	09:40:00
KAIT	2016-11-12 20:41:00	2.286	2016-11-13	09:41:00
KAIT	2016-11-12 20:42:00	2.273	2016-11-13	09:42:00
KAIT	2016-11-12 20:43:00	2.279	2016-11-13	09:43:00
KAIT	2016-11-12 20:44:00	2.263	2016-11-13	09:44:00
KAIT	2016-11-12 20:45:00	2.27	2016-11-13	09:45:00
KAIT	2016-11-12 20:46:00	2.27	2016-11-13	09:46:00
KAIT	2016-11-12 20:47:00	2.265	2016-11-13	09:47:00
KAIT	2016-11-12 20:48:00	2.265	2016-11-13	09:48:00
KAIT	2016-11-12 20:49:00	2.26	2016-11-13	09:49:00
KAIT	2016-11-12 20:50:00	2.273	2016-11-13	09:50:00
KAIT	2016-11-12 20:51:00	2.273	2016-11-13	09:51:00
KAIT	2016-11-12 20:52:00	2.272	2016-11-13	09:52:00
KAIT	2016-11-12 20:53:00	2.275	2016-11-13	09:53:00
KAIT	2016-11-12 20:54:00	2.271	2016-11-13	09:54:00
KAIT	2016-11-12 20:55:00	2.271	2016-11-13	09:55:00	LT 0.3
KAIT	2016-11-12 20:56:00	2.271	2016-11-13	09:56:00	Ave	SD
KAIT	2016-11-12 20:57:00	2.268	2016-11-13	09:57:00	2.29238	0.0184831		0.3	2.3
KAIT	2016-11-12 20:58:00	2.266	2016-11-13	09:58:00
KAIT	2016-11-12 20:59:00	2.273	2016-11-13	09:59:00
KAIT	2016-11-12 21:00:00	2.267	2016-11-13	10:00:00
KAIT	2016-11-12 21:01:00	2.278	2016-11-13	10:01:00
KAIT	2016-11-12 21:02:00	2.264	2016-11-13	10:02:00
KAIT	2016-11-12 21:03:00	2.293	2016-11-13	10:03:00
KAIT	2016-11-12 21:04:00	2.295	2016-11-13	10:04:00
KAIT	2016-11-12 21:05:00	2.293	2016-11-13	10:05:00
KAIT	2016-11-12 21:06:00	2.284	2016-11-13	10:06:00
KAIT	2016-11-12 21:07:00	2.28	2016-11-13	10:07:00
KAIT	2016-11-12 21:08:00	2.281	2016-11-13	10:08:00
KAIT	2016-11-12 21:09:00	2.277	2016-11-13	10:09:00
KAIT	2016-11-12 21:10:00	2.283	2016-11-13	10:10:00
KAIT	2016-11-12 21:11:00	2.277	2016-11-13	10:11:00
KAIT	2016-11-12 21:12:00	2.269	2016-11-13	10:12:00
KAIT	2016-11-12 21:13:00	2.281	2016-11-13	10:13:00
KAIT	2016-11-12 21:14:00	2.285	2016-11-13	10:14:00
KAIT	2016-11-12 21:15:00	2.287	2016-11-13	10:15:00
KAIT	2016-11-12 21:16:00	2.287	2016-11-13	10:16:00
KAIT	2016-11-12 21:17:00	2.288	2016-11-13	10:17:00
KAIT	2016-11-12 21:18:00	2.282	2016-11-13	10:18:00
KAIT	2016-11-12 21:19:00	2.292	2016-11-13	10:19:00
KAIT	2016-11-12 21:20:00	2.29	2016-11-13	10:20:00
KAIT	2016-11-12 21:21:00	2.289	2016-11-13	10:21:00
KAIT	2016-11-12 21:22:00	2.287	2016-11-13	10:22:00
KAIT	2016-11-12 21:23:00	2.288	2016-11-13	10:23:00
KAIT	2016-11-12 21:24:00	2.3	2016-11-13	10:24:00
KAIT	2016-11-12 21:25:00	2.301	2016-11-13	10:25:00
KAIT	2016-11-12 21:26:00	2.31	2016-11-13	10:26:00
KAIT	2016-11-12 21:27:00	2.319	2016-11-13	10:27:00
KAIT	2016-11-12 21:28:00	2.313	2016-11-13	10:28:00
KAIT	2016-11-12 21:29:00	2.32	2016-11-13	10:29:00
KAIT	2016-11-12 21:30:00	2.301	2016-11-13	10:30:00
KAIT	2016-11-12 21:31:00	2.307	2016-11-13	10:31:00
KAIT	2016-11-12 21:32:00	2.321	2016-11-13	10:32:00
KAIT	2016-11-12 21:33:00	2.316	2016-11-13	10:33:00
KAIT	2016-11-12 21:34:00	2.316	2016-11-13	10:34:00
KAIT	2016-11-12 21:35:00	2.314	2016-11-13	10:35:00
KAIT	2016-11-12 21:36:00	2.308	2016-11-13	10:36:00
KAIT	2016-11-12 21:37:00	2.33	2016-11-13	10:37:00
KAIT	2016-11-12 21:38:00	2.322	2016-11-13	10:38:00
KAIT	2016-11-12 21:39:00	2.312	2016-11-13	10:39:00
KAIT	2016-11-12 21:40:00	2.331	2016-11-13	10:40:00
KAIT	2016-11-12 21:41:00	2.321	2016-11-13	10:41:00
KAIT	2016-11-12 21:42:00	2.335	2016-11-13	10:42:00
KAIT	2016-11-12 21:43:00	2.338	2016-11-13	10:43:00
KAIT	2016-11-12 21:44:00	2.339	2016-11-13	10:44:00
KAIT	2016-11-12 21:45:00	2.33	2016-11-13	10:45:00
KAIT	2016-11-12 21:46:00	2.341	2016-11-13	10:46:00
KAIT	2016-11-12 21:47:00	2.35	2016-11-13	10:47:00
KAIT	2016-11-12 21:48:00	2.339	2016-11-13	10:48:00
KAIT	2016-11-12 21:49:00	2.342	2016-11-13	10:49:00
KAIT	2016-11-12 21:50:00	2.355	2016-11-13	10:50:00
KAIT	2016-11-12 21:51:00	2.352	2016-11-13	10:51:00
KAIT	2016-11-12 21:52:00	2.363	2016-11-13	10:52:00
KAIT	2016-11-12 21:53:00	2.36	2016-11-13	10:53:00
KAIT	2016-11-12 21:54:00	2.364	2016-11-13	10:54:00
KAIT	2016-11-12 21:55:00	2.369	2016-11-13	10:55:00
KAIT	2016-11-12 21:56:00	2.361	2016-11-13	10:56:00
KAIT	2016-11-12 21:57:00	2.372	2016-11-13	10:57:00
KAIT	2016-11-12 21:58:00	2.378	2016-11-13	10:58:00
KAIT	2016-11-12 21:59:00	2.373	2016-11-13	10:59:00
KAIT	2016-11-12 22:00:00	2.374	2016-11-13	11:00:00
KAIT	2016-11-12 22:01:00	2.379	2016-11-13	11:01:00
KAIT	2016-11-12 22:02:00	2.382	2016-11-13	11:02:00
KAIT	2016-11-12 22:03:00	2.396	2016-11-13	11:03:00
KAIT	2016-11-12 22:04:00	2.412	2016-11-13	11:04:00
KAIT	2016-11-12 22:05:00	2.393	2016-11-13	11:05:00
KAIT	2016-11-12 22:06:00	2.374	2016-11-13	11:06:00
KAIT	2016-11-12 22:07:00	2.392	2016-11-13	11:07:00
KAIT	2016-11-12 22:08:00	2.393	2016-11-13	11:08:00
KAIT	2016-11-12 22:09:00	2.389	2016-11-13	11:09:00
KAIT	2016-11-12 22:10:00	2.39	2016-11-13	11:10:00
KAIT	2016-11-12 22:11:00	2.405	2016-11-13	11:11:00
KAIT	2016-11-12 22:12:00	2.401	2016-11-13	11:12:00
KAIT	2016-11-12 22:13:00	2.403	2016-11-13	11:13:00
KAIT	2016-11-12 22:14:00	2.422	2016-11-13	11:14:00
KAIT	2016-11-12 22:15:00	2.429	2016-11-13	11:15:00
KAIT	2016-11-12 22:16:00	2.437	2016-11-13	11:16:00
KAIT	2016-11-12 22:17:00	2.435	2016-11-13	11:17:00
KAIT	2016-11-12 22:18:00	2.437	2016-11-13	11:18:00
KAIT	2016-11-12 22:19:00	2.446	2016-11-13	11:19:00
KAIT	2016-11-12 22:20:00	2.451	2016-11-13	11:20:00
[truncated: 3,638 more rows]
[truncated: 3 more columns]

## Sheet: Method D
	2015-12-01						2016-12-01
	Tide Gauge	UTC date/time	Elevation_m	Ave elev Dec-15	SD		Tide Gauge	UTC date/time	Elevation_m	Ave elev Dec-16	SD	Diff in ave elev	Ave_diff of aligned tidal readings	Diff Jan16-17	SD
1	KAIT	2015-12-01	3.038	3.02621	0.492242					2.06416	0.490899	0.962053	0.96359	0.912157	0.495337
2	KAIT	2015-12-01 00:01:00	3.025
3	KAIT	2015-12-01 00:02:00	3.024
4	KAIT	2015-12-01 00:03:00	3.012
5	KAIT	2015-12-01 00:04:00	3.003
6	KAIT	2015-12-01 00:05:00	3.022
7	KAIT	2015-12-01 00:06:00	2.995
8	KAIT	2015-12-01 00:07:00	3.007
9	KAIT	2015-12-01 00:08:00	3.023
10	KAIT	2015-12-01 00:09:00	2.98
11	KAIT	2015-12-01 00:10:00	2.981
12	KAIT	2015-12-01 00:11:00	2.97
13	KAIT	2015-12-01 00:12:00	2.961
14	KAIT	2015-12-01 00:13:00	2.953
15	KAIT	2015-12-01 00:14:00	2.942
16	KAIT	2015-12-01 00:15:00	2.953
17	KAIT	2015-12-01 00:16:00	2.934
18	KAIT	2015-12-01 00:17:00	2.922
19	KAIT	2015-12-01 00:18:00	2.916
20	KAIT	2015-12-01 00:19:00	2.906
21	KAIT	2015-12-01 00:20:00	2.913
22	KAIT	2015-12-01 00:21:00	2.887
23	KAIT	2015-12-01 00:22:00	2.91
24	KAIT	2015-12-01 00:23:00	2.902
25	KAIT	2015-12-01 00:24:00	2.875
26	KAIT	2015-12-01 00:25:00	2.881
27	KAIT	2015-12-01 00:26:00	2.872
28	KAIT	2015-12-01 00:27:00	2.861
29	KAIT	2015-12-01 00:28:00	2.861
30	KAIT	2015-12-01 00:29:00	2.852
31	KAIT	2015-12-01 00:30:00	2.844
32	KAIT	2015-12-01 00:31:00	2.853
33	KAIT	2015-12-01 00:32:00	2.854
34	KAIT	2015-12-01 00:33:00	2.832
35	KAIT	2015-12-01 00:34:00	2.819
36	KAIT	2015-12-01 00:35:00	2.815
37	KAIT	2015-12-01 00:36:00	2.817
38	KAIT	2015-12-01 00:37:00	2.823
39	KAIT	2015-12-01 00:38:00	2.802
40	KAIT	2015-12-01 00:39:00	2.805
41	KAIT	2015-12-01 00:40:00	2.813
42	KAIT	2015-12-01 00:41:00	2.81
43	KAIT	2015-12-01 00:42:00	2.769
44	KAIT	2015-12-01 00:43:00	2.778
45	KAIT	2015-12-01 00:44:00	2.78
46	KAIT	2015-12-01 00:45:00	2.754
47	KAIT	2015-12-01 00:46:00	2.744
48	KAIT	2015-12-01 00:47:00	2.744
49	KAIT	2015-12-01 00:48:00	2.751
50	KAIT	2015-12-01 00:49:00	2.721
51	KAIT	2015-12-01 00:50:00	2.728
52	KAIT	2015-12-01 00:51:00	2.72
53	KAIT	2015-12-01 00:52:00	2.69
54	KAIT	2015-12-01 00:53:00	2.698
55	KAIT	2015-12-01 00:54:00	2.681
56	KAIT	2015-12-01 00:55:00	2.691
57	KAIT	2015-12-01 00:56:00	2.646
58	KAIT	2015-12-01 00:57:00	2.683
59	KAIT	2015-12-01 00:58:00	2.681
60	KAIT	2015-12-01 00:59:00	2.686
61	KAIT	2015-12-01 01:00:00	2.654
62	KAIT	2015-12-01 01:01:00	2.644
63	KAIT	2015-12-01 01:02:00	2.663
64	KAIT	2015-12-01 01:03:00	2.647
65	KAIT	2015-12-01 01:04:00	2.647
66	KAIT	2015-12-01 01:05:00	2.641
67	KAIT	2015-12-01 01:06:00	2.643
68	KAIT	2015-12-01 01:07:00	2.629
69	KAIT	2015-12-01 01:08:00	2.62
70	KAIT	2015-12-01 01:09:00	2.643
71	KAIT	2015-12-01 01:10:00	2.612
72	KAIT	2015-12-01 01:11:00	2.613
73	KAIT	2015-12-01 01:12:00	2.612
74	KAIT	2015-12-01 01:13:00	2.592
75	KAIT	2015-12-01 01:14:00	2.583
76	KAIT	2015-12-01 01:15:00	2.597
77	KAIT	2015-12-01 01:16:00	2.594
78	KAIT	2015-12-01 01:17:00	2.606
79	KAIT	2015-12-01 01:18:00	2.573
80	KAIT	2015-12-01 01:19:00	2.576
81	KAIT	2015-12-01 01:20:00	2.551
82	KAIT	2015-12-01 01:21:00	2.564
83	KAIT	2015-12-01 01:22:00	2.541
84	KAIT	2015-12-01 01:23:00	2.534
85	KAIT	2015-12-01 01:24:00	2.543
86	KAIT	2015-12-01 01:25:00	2.518
87	KAIT	2015-12-01 01:26:00	2.514
88	KAIT	2015-12-01 01:27:00	2.53
89	KAIT	2015-12-01 01:28:00	2.495
90	KAIT	2015-12-01 01:29:00	2.49
91	KAIT	2015-12-01 01:30:00	2.483
92	KAIT	2015-12-01 01:31:00	2.487
93	KAIT	2015-12-01 01:32:00	2.48
94	KAIT	2015-12-01 01:33:00	2.471
95	KAIT	2015-12-01 01:34:00	2.487
96	KAIT	2015-12-01 01:35:00	2.458
97	KAIT	2015-12-01 01:36:00	2.492
98	KAIT	2015-12-01 01:37:00	2.459
99	KAIT	2015-12-01 01:38:00	2.467
100	KAIT	2015-12-01 01:39:00	2.435
101	KAIT	2015-12-01 01:40:00	2.452
102	KAIT	2015-12-01 01:41:00	2.434
103	KAIT	2015-12-01 01:42:00	2.427
104	KAIT	2015-12-01 01:43:00	2.431
105	KAIT	2015-12-01 01:44:00	2.419
106	KAIT	2015-12-01 01:45:00	2.42
107	KAIT	2015-12-01 01:46:00	2.379
108	KAIT	2015-12-01 01:47:00	2.407
109	KAIT	2015-12-01 01:48:00	2.393
110	KAIT	2015-12-01 01:49:00	2.417
111	KAIT	2015-12-01 01:50:00	2.416
112	KAIT	2015-12-01 01:51:00	2.411
113	KAIT	2015-12-01 01:52:00	2.391
114	KAIT	2015-12-01 01:53:00	2.412
115	KAIT	2015-12-01 01:54:00	2.372
116	KAIT	2015-12-01 01:55:00	2.39
117	KAIT	2015-12-01 01:56:00	2.364
118	KAIT	2015-12-01 01:57:00	2.39
119	KAIT	2015-12-01 01:58:00	2.363
120	KAIT	2015-12-01 01:59:00	2.363
121	KAIT	2015-12-01 02:00:00	2.35
122	KAIT	2015-12-01 02:01:00	2.364
123	KAIT	2015-12-01 02:02:00	2.342
124	KAIT	2015-12-01 02:03:00	2.33
125	KAIT	2015-12-01 02:04:00	2.337
126	KAIT	2015-12-01 02:05:00	2.345
127	KAIT	2015-12-01 02:06:00	2.311
128	KAIT	2015-12-01 02:07:00	2.334
129	KAIT	2015-12-01 02:08:00	2.344
130	KAIT	2015-12-01 02:09:00	2.336
131	KAIT	2015-12-01 02:10:00	2.336
132	KAIT	2015-12-01 02:11:00	2.339
133	KAIT	2015-12-01 02:12:00	2.296
134	KAIT	2015-12-01 02:13:00	2.31
135	KAIT	2015-12-01 02:14:00	2.309
136	KAIT	2015-12-01 02:15:00	2.301
137	KAIT	2015-12-01 02:16:00	2.286
138	KAIT	2015-12-01 02:17:00	2.282
139	KAIT	2015-12-01 02:18:00	2.261
140	KAIT	2015-12-01 02:19:00	2.31
141	KAIT	2015-12-01 02:20:00	2.28
142	KAIT	2015-12-01 02:21:00	2.265
143	KAIT	2015-12-01 02:22:00	2.246
144	KAIT	2015-12-01 02:23:00	2.268
145	KAIT	2015-12-01 02:24:00	2.265
146	KAIT	2015-12-01 02:25:00	2.266
147	KAIT	2015-12-01 02:26:00	2.274
148	KAIT	2015-12-01 02:27:00	2.265
149	KAIT	2015-12-01 02:28:00	2.28
150	KAIT	2015-12-01 02:29:00	2.304
151	KAIT	2015-12-01 02:30:00	2.279
152	KAIT	2015-12-01 02:31:00	2.264
153	KAIT	2015-12-01 02:32:00	2.26
154	KAIT	2015-12-01 02:33:00	2.285
155	KAIT	2015-12-01 02:34:00	2.254
156	KAIT	2015-12-01 02:35:00	2.273
157	KAIT	2015-12-01 02:36:00	2.258
158	KAIT	2015-12-01 02:37:00	2.256
159	KAIT	2015-12-01 02:38:00	2.228
160	KAIT	2015-12-01 02:39:00	2.254
161	KAIT	2015-12-01 02:40:00	2.236
162	KAIT	2015-12-01 02:41:00	2.229			163	KAIT	2016-12-01	1.488	2.06416	0.490899		0.741									post-EQ	1.98
163	KAIT	2015-12-01 02:42:00	2.23			164	KAIT	2016-12-01 00:01:00	1.501				0.729										-1.98
164	KAIT	2015-12-01 02:43:00	2.227			165	KAIT	2016-12-01 00:02:00	1.487				0.74
165	KAIT	2015-12-01 02:44:00	2.237			166	KAIT	2016-12-01 00:03:00	1.485				0.752
166	KAIT	2015-12-01 02:45:00	2.23			167	KAIT	2016-12-01 00:04:00	1.492				0.738
167	KAIT	2015-12-01 02:46:00	2.225			168	KAIT	2016-12-01 00:05:00	1.48				0.745
168	KAIT	2015-12-01 02:47:00	2.225			169	KAIT	2016-12-01 00:06:00	1.498				0.727
169	KAIT	2015-12-01 02:48:00	2.238			170	KAIT	2016-12-01 00:07:00	1.5				0.738
170	KAIT	2015-12-01 02:49:00	2.229			171	KAIT	2016-12-01 00:08:00	1.492				0.737
171	KAIT	2015-12-01 02:50:00	2.224			172	KAIT	2016-12-01 00:09:00	1.481				0.743
172	KAIT	2015-12-01 02:51:00	2.225			173	KAIT	2016-12-01 00:10:00	1.486				0.739
173	KAIT	2015-12-01 02:52:00	2.219			174	KAIT	2016-12-01 00:11:00	1.479				0.74
174	KAIT	2015-12-01 02:53:00	2.234			175	KAIT	2016-12-01 00:12:00	1.488				0.746
175	KAIT	2015-12-01 02:54:00	2.222			176	KAIT	2016-12-01 00:13:00	1.485				0.737
176	KAIT	2015-12-01 02:55:00	2.223			177	KAIT	2016-12-01 00:14:00	1.484				0.739
177	KAIT	2015-12-01 02:56:00	2.204			178	KAIT	2016-12-01 00:15:00	1.473				0.731
178	KAIT	2015-12-01 02:57:00	2.231			179	KAIT	2016-12-01 00:16:00	1.494				0.737
179	KAIT	2015-12-01 02:58:00	2.219			180	KAIT	2016-12-01 00:17:00	1.487				0.732
180	KAIT	2015-12-01 02:59:00	2.22			181	KAIT	2016-12-01 00:18:00	1.483				0.737
181	KAIT	2015-12-01 03:00:00	2.204			182	KAIT	2016-12-01 00:19:00	1.488				0.716
182	KAIT	2015-12-01 03:01:00	2.223			183	KAIT	2016-12-01 00:20:00	1.495				0.728
183	KAIT	2015-12-01 03:02:00	2.221			184	KAIT	2016-12-01 00:21:00	1.494				0.727
184	KAIT	2015-12-01 03:03:00	2.219			185	KAIT	2016-12-01 00:22:00	1.501				0.718
185	KAIT	2015-12-01 03:04:00	2.223			186	KAIT	2016-12-01 00:23:00	1.487				0.736
186	KAIT	2015-12-01 03:05:00	2.217			187	KAIT	2016-12-01 00:24:00	1.479				0.738
187	KAIT	2015-12-01 03:06:00	2.215			188	KAIT	2016-12-01 00:25:00	1.498				0.717
188	KAIT	2015-12-01 03:07:00	2.194			189	KAIT	2016-12-01 00:26:00	1.492				0.702
189	KAIT	2015-12-01 03:08:00	2.214			190	KAIT	2016-12-01 00:27:00	1.5				0.714
190	KAIT	2015-12-01 03:09:00	2.198			191	KAIT	2016-12-01 00:28:00	1.509				0.689
191	KAIT	2015-12-01 03:10:00	2.197			192	KAIT	2016-12-01 00:29:00	1.503				0.694
192	KAIT	2015-12-01 03:11:00	2.183			193	KAIT	2016-12-01 00:30:00	1.524				0.659
193	KAIT	2015-12-01 03:12:00	2.191			194	KAIT	2016-12-01 00:31:00	1.516				0.675
194	KAIT	2015-12-01 03:13:00	2.203			195	KAIT	2016-12-01 00:32:00	1.506				0.697
195	KAIT	2015-12-01 03:14:00	2.209			196	KAIT	2016-12-01 00:33:00	1.524				0.685
196	KAIT	2015-12-01 03:15:00	2.187			197	KAIT	2016-12-01 00:34:00	1.496				0.691
197	KAIT	2015-12-01 03:16:00	2.203			198	KAIT	2016-12-01 00:35:00	1.515				0.688
198	KAIT	2015-12-01 03:17:00	2.197			199	KAIT	2016-12-01 00:36:00	1.499				0.698
199	KAIT	2015-12-01 03:18:00	2.211			200	KAIT	2016-12-01 00:37:00	1.511				0.7
200	KAIT	2015-12-01 03:19:00	2.22			201	KAIT	2016-12-01 00:38:00	1.5				0.72
201	KAIT	2015-12-01 03:20:00	2.218			202	KAIT	2016-12-01 00:39:00	1.493				0.725
202	KAIT	2015-12-01 03:21:00	2.202			203	KAIT	2016-12-01 00:40:00	1.523				0.679
203	KAIT	2015-12-01 03:22:00	2.23			204	KAIT	2016-12-01 00:41:00	1.505				0.725
204	KAIT	2015-12-01 03:23:00	2.231			205	KAIT	2016-12-01 00:42:00	1.51				0.721
205	KAIT	2015-12-01 03:24:00	2.221			206	KAIT	2016-12-01 00:43:00	1.53				0.691
206	KAIT	2015-12-01 03:25:00	2.211			207	KAIT	2016-12-01 00:44:00	1.521				0.69
207	KAIT	2015-12-01 03:26:00	2.224			208	KAIT	2016-12-01 00:45:00	1.511				0.713
208	KAIT	2015-12-01 03:27:00	2.22			209	KAIT	2016-12-01 00:46:00	1.496				0.724
209	KAIT	2015-12-01 03:28:00	2.21			210	KAIT	2016-12-01 00:47:00	1.522				0.688
210	KAIT	2015-12-01 03:29:00	2.218			211	KAIT	2016-12-01 00:48:00	1.518				0.7
211	KAIT	2015-12-01 03:30:00	2.207			212	KAIT	2016-12-01 00:49:00	1.512				0.695
212	KAIT	2015-12-01 03:31:00	2.208			213	KAIT	2016-12-01 00:50:00	1.498				0.71
213	KAIT	2015-12-01 03:32:00	2.191			214	KAIT	2016-12-01 00:51:00	1.527				0.664
214	KAIT	2015-12-01 03:33:00	2.218			215	KAIT	2016-12-01 00:52:00	1.533				0.685
215	KAIT	2015-12-01 03:34:00	2.213			216	KAIT	2016-12-01 00:53:00	1.527				0.686
216	KAIT	2015-12-01 03:35:00	2.23			217	KAIT	2016-12-01 00:54:00	1.503				0.727
217	KAIT	2015-12-01 03:36:00	2.196			218	KAIT	2016-12-01 00:55:00	1.528				0.668
218	KAIT	2015-12-01 03:37:00	2.228			219	KAIT	2016-12-01 00:56:00	1.523				0.705
219	KAIT	2015-12-01 03:38:00	2.22			220	KAIT	2016-12-01 00:57:00	1.53				0.69
220	KAIT	2015-12-01 03:39:00	2.215			221	KAIT	2016-12-01 00:58:00	1.524				0.691
221	KAIT	2015-12-01 03:40:00	2.213			222	KAIT	2016-12-01 00:59:00	1.537				0.676
222	KAIT	2015-12-01 03:41:00	2.218			223	KAIT	2016-12-01 01:00:00	1.536				0.682
223	KAIT	2015-12-01 03:42:00	2.22			224	KAIT	2016-12-01 01:01:00	1.549				0.671
224	KAIT	2015-12-01 03:43:00	2.237			225	KAIT	2016-12-01 01:02:00	1.535				0.702
225	KAIT	2015-12-01 03:44:00	2.229			226	KAIT	2016-12-01 01:03:00	1.562				0.667
226	KAIT	2015-12-01 03:45:00	2.253			227	KAIT	2016-12-01 01:04:00	1.56				0.693
227	KAIT	2015-12-01 03:46:00	2.212			228	KAIT	2016-12-01 01:05:00	1.555				0.657
228	KAIT	2015-12-01 03:47:00	2.233			229	KAIT	2016-12-01 01:06:00	1.544				0.689
229	KAIT	2015-12-01 03:48:00	2.222			230	KAIT	2016-12-01 01:07:00	1.557				0.665
230	KAIT	2015-12-01 03:49:00	2.24			231	KAIT	2016-12-01 01:08:00	1.552				0.688
231	KAIT	2015-12-01 03:50:00	2.227			232	KAIT	2016-12-01 01:09:00	1.551				0.676
232	KAIT	2015-12-01 03:51:00	2.243			233	KAIT	2016-12-01 01:10:00	1.551				0.692
233	KAIT	2015-12-01 03:52:00	2.236			234	KAIT	2016-12-01 01:11:00	1.558				0.678
234	KAIT	2015-12-01 03:53:00	2.245			235	KAIT	2016-12-01 01:12:00	1.561				0.684
235	KAIT	2015-12-01 03:54:00	2.254			236	KAIT	2016-12-01 01:13:00	1.559				0.695
236	KAIT	2015-12-01 03:55:00	2.233			237	KAIT	2016-12-01 01:14:00	1.557				0.676
237	KAIT	2015-12-01 03:56:00	2.233			238	KAIT	2016-12-01 01:15:00	1.56				0.673
238	KAIT	2015-12-01 03:57:00	2.26			239	KAIT	2016-12-01 01:16:00	1.568				0.692
239	KAIT	2015-12-01 03:58:00	2.242			240	KAIT	2016-12-01 01:17:00	1.573				0.669
240	KAIT	2015-12-01 03:59:00	2.25			241	KAIT	2016-12-01 01:18:00	1.567				0.683
241	KAIT	2015-12-01 04:00:00	2.244			242	KAIT	2016-12-01 01:19:00	1.582				0.662
242	KAIT	2015-12-01 04:01:00	2.25			243	KAIT	2016-12-01 01:20:00	1.572				0.678
243	KAIT	2015-12-01 04:02:00	2.243			244	KAIT	2016-12-01 01:21:00	1.578				0.665
244	KAIT	2015-12-01 04:03:00	2.258			245	KAIT	2016-12-01 01:22:00	1.571				0.687
245	KAIT	2015-12-01 04:04:00	2.27			246	KAIT	2016-12-01 01:23:00	1.578				0.692
246	KAIT	2015-12-01 04:05:00	2.263			247	KAIT	2016-12-01 01:24:00	1.572				0.691
247	KAIT	2015-12-01 04:06:00	2.262			248	KAIT	2016-12-01 01:25:00	1.589				0.673
248	KAIT	2015-12-01 04:07:00	2.269			249	KAIT	2016-12-01 01:26:00	1.608				0.661
249	KAIT	2015-12-01 04:08:00	2.281			250	KAIT	2016-12-01 01:27:00	1.589				0.692
250	KAIT	2015-12-01 04:09:00	2.264			251	KAIT	2016-12-01 01:28:00	1.614				0.65
251	KAIT	2015-12-01 04:10:00	2.271			252	KAIT	2016-12-01 01:29:00	1.591				0.68
252	KAIT	2015-12-01 04:11:00	2.278			253	KAIT	2016-12-01 01:30:00	1.623				0.655
253	KAIT	2015-12-01 04:12:00	2.275			254	KAIT	2016-12-01 01:31:00	1.615				0.66
254	KAIT	2015-12-01 04:13:00	2.283			255	KAIT	2016-12-01 01:32:00	1.601				0.682
255	KAIT	2015-12-01 04:14:00	2.279			256	KAIT	2016-12-01 01:33:00	1.618				0.661
256	KAIT	2015-12-01 04:15:00	2.3			257	KAIT	2016-12-01 01:34:00	1.622				0.678
257	KAIT	2015-12-01 04:16:00	2.307			258	KAIT	2016-12-01 01:35:00	1.608				0.699
258	KAIT	2015-12-01 04:17:00	2.315			259	KAIT	2016-12-01 01:36:00	1.611				0.704
259	KAIT	2015-12-01 04:18:00	2.314			260	KAIT	2016-12-01 01:37:00	1.625				0.689
260	KAIT	2015-12-01 04:19:00	2.33			261	KAIT	2016-12-01 01:38:00	1.619				0.711
261	KAIT	2015-12-01 04:20:00	2.292			262	KAIT	2016-12-01 01:39:00	1.629				0.663
262	KAIT	2015-12-01 04:21:00	2.317			263	KAIT	2016-12-01 01:40:00	1.634				0.683
263	KAIT	2015-12-01 04:22:00	2.318			264	KAIT	2016-12-01 01:41:00	1.642				0.676
264	KAIT	2015-12-01 04:23:00	2.321			265	KAIT	2016-12-01 01:42:00	1.622				0.699
265	KAIT	2015-12-01 04:24:00	2.342			266	KAIT	2016-12-01 01:43:00	1.653				0.689
266	KAIT	2015-12-01 04:25:00	2.334			267	KAIT	2016-12-01 01:44:00	1.642				0.692
267	KAIT	2015-12-01 04:26:00	2.353			268	KAIT	2016-12-01 01:45:00	1.664				0.689
268	KAIT	2015-12-01 04:27:00	2.338			269	KAIT	2016-12-01 01:46:00	1.654				0.684
269	KAIT	2015-12-01 04:28:00	2.343			270	KAIT	2016-12-01 01:47:00	1.664				0.679
270	KAIT	2015-12-01 04:29:00	2.374			271	KAIT	2016-12-01 01:48:00	1.669				0.705
271	KAIT	2015-12-01 04:30:00	2.336			272	KAIT	2016-12-01 01:49:00	1.657				0.679
272	KAIT	2015-12-01 04:31:00	2.356			273	KAIT	2016-12-01 01:50:00	1.689				0.667
273	KAIT	2015-12-01 04:32:00	2.35			274	KAIT	2016-12-01 01:51:00	1.681				0.669
274	KAIT	2015-12-01 04:33:00	2.351			275	KAIT	2016-12-01 01:52:00	1.684				0.667
275	KAIT	2015-12-01 04:34:00	2.368			276	KAIT	2016-12-01 01:53:00	1.697				0.671
276	KAIT	2015-12-01 04:35:00	2.368			277	KAIT	2016-12-01 01:54:00	1.701				0.667
277	KAIT	2015-12-01 04:36:00	2.36			278	KAIT	2016-12-01 01:55:00	1.706				0.654
278	KAIT	2015-12-01 04:37:00	2.371			279	KAIT	2016-12-01 01:56:00	1.704				0.667
279	KAIT	2015-12-01 04:38:00	2.377			280	KAIT	2016-12-01 01:57:00	1.71				0.667
280	KAIT	2015-12-01 04:39:00	2.377			281	KAIT	2016-12-01 01:58:00	1.706				0.671
281	KAIT	2015-12-01 04:40:00	2.377			282	KAIT	2016-12-01 01:59:00	1.697				0.68
282	KAIT	2015-12-01 04:41:00	2.388			283	KAIT	2016-12-01 02:00:00	1.694				0.694
283	KAIT	2015-12-01 04:42:00	2.386			284	KAIT	2016-12-01 02:01:00	1.715				0.671
284	KAIT	2015-12-01 04:43:00	2.396			285	KAIT	2016-12-01 02:02:00	1.705				0.691
285	KAIT	2015-12-01 04:44:00	2.395			286	KAIT	2016-12-01 02:03:00	1.705				0.69
286	KAIT	2015-12-01 04:45:00	2.412			287	KAIT	2016-12-01 02:04:00	1.701				0.711
287	KAIT	2015-12-01 04:46:00	2.393			288	KAIT	2016-12-01 02:05:00	1.715				0.678
288	KAIT	2015-12-01 04:47:00	2.413			289	KAIT	2016-12-01 02:06:00	1.741				0.672
289	KAIT	2015-12-01 04:48:00	2.419			290	KAIT	2016-12-01 02:07:00	1.719				0.7
290	KAIT	2015-12-01 04:49:00	2.428			291	KAIT	2016-12-01 02:08:00	1.74				0.688
291	KAIT	2015-12-01 04:50:00	2.426			292	KAIT	2016-12-01 02:09:00	1.735				0.691
292	KAIT	2015-12-01 04:51:00	2.44			293	KAIT	2016-12-01 02:10:00	1.74				0.7
293	KAIT	2015-12-01 04:52:00	2.416			294	KAIT	2016-12-01 02:11:00	1.737				0.679
294	KAIT	2015-12-01 04:53:00	2.432			295	KAIT	2016-12-01 02:12:00	1.74				0.692
295	KAIT	2015-12-01 04:54:00	2.451			296	KAIT	2016-12-01 02:13:00	1.739				0.712
296	KAIT	2015-12-01 04:55:00	2.451			297	KAIT	2016-12-01 02:14:00	1.751				0.7
297	KAIT	2015-12-01 04:56:00	2.438			298	KAIT	2016-12-01 02:15:00	1.767				0.671
298	KAIT	2015-12-01 04:57:00	2.448			299	KAIT	2016-12-01 02:16:00	1.778				0.67
299	KAIT	2015-12-01 04:58:00	2.451			300	KAIT	2016-12-01 02:17:00	1.788				0.663
300	KAIT	2015-12-01 04:59:00	2.461			301	KAIT	2016-12-01 02:18:00	1.782				0.679
301	KAIT	2015-12-01 05:00:00	2.459			302	KAIT	2016-12-01 02:19:00	1.794				0.665
302	KAIT	2015-12-01 05:01:00	2.46			303	KAIT	2016-12-01 02:20:00	1.802				0.658
303	KAIT	2015-12-01 05:02:00	2.46			304	KAIT	2016-12-01 02:21:00	1.785				0.675
304	KAIT	2015-12-01 05:03:00	2.481			305	KAIT	2016-12-01 02:22:00	1.806				0.675
305	KAIT	2015-12-01 05:04:00	2.483			306	KAIT	2016-12-01 02:23:00	1.801				0.682
306	KAIT	2015-12-01 05:05:00	2.497			307	KAIT	2016-12-01 02:24:00	1.813				0.684
307	KAIT	2015-12-01 05:06:00	2.487			308	KAIT	2016-12-01 02:25:00	1.808				0.679
308	KAIT	2015-12-01 05:07:00	2.479			309	KAIT	2016-12-01 02:26:00	1.809				0.67
309	KAIT	2015-12-01 05:08:00	2.49			310	KAIT	2016-12-01 02:27:00	1.825				0.665
310	KAIT	2015-12-01 05:09:00	2.481			311	KAIT	2016-12-01 02:28:00	1.82				0.661
311	KAIT	2015-12-01 05:10:00	2.485			312	KAIT	2016-12-01 02:29:00	1.821				0.664
312	KAIT	2015-12-01 05:11:00	2.508			313	KAIT	2016-12-01 02:30:00	1.828				0.68
313	KAIT	2015-12-01 05:12:00	2.505			314	KAIT	2016-12-01 02:31:00	1.821				0.684
314	KAIT	2015-12-01 05:13:00	2.514			315	KAIT	2016-12-01 02:32:00	1.843				0.671
315	KAIT	2015-12-01 05:14:00	2.523			316	KAIT	2016-12-01 02:33:00	1.845				0.678
316	KAIT	2015-12-01 05:15:00	2.529			317	KAIT	2016-12-01 02:34:00	1.832				0.697
317	KAIT	2015-12-01 05:16:00	2.546			318	KAIT	2016-12-01 02:35:00	1.84				0.706
318	KAIT	2015-12-01 05:17:00	2.526			319	KAIT	2016-12-01 02:36:00	1.837				0.689
319	KAIT	2015-12-01 05:18:00	2.53			320	KAIT	2016-12-01 02:37:00	1.862				0.668
320	KAIT	2015-12-01 05:19:00	2.572			321	KAIT	2016-12-01 02:38:00	1.861				0.711
321	KAIT	2015-12-01 05:20:00	2.537			322	KAIT	2016-12-01 02:39:00	1.871				0.666
322	KAIT	2015-12-01 05:21:00	2.561			323	KAIT	2016-12-01 02:40:00	1.877				0.684
323	KAIT	2015-12-01 05:22:00	2.562			324	KAIT	2016-12-01 02:41:00	1.878				0.684
324	KAIT	2015-12-01 05:23:00	2.576			325	KAIT	2016-12-01 02:42:00	1.899				0.677
325	KAIT	2015-12-01 05:24:00	2.591			326	KAIT	2016-12-01 02:43:00	1.901				0.69
326	KAIT	2015-12-01 05:25:00	2.559			327	KAIT	2016-12-01 02:44:00	1.908				0.651
327	KAIT	2015-12-01 05:26:00	2.582			328	KAIT	2016-12-01 02:45:00	1.907				0.675
328	KAIT	2015-12-01 05:27:00	2.605			329	KAIT	2016-12-01 02:46:00	1.899				0.706
329	KAIT	2015-12-01 05:28:00	2.591			330	KAIT	2016-12-01 02:47:00	1.898				0.693
330	KAIT	2015-12-01 05:29:00	2.604			331	KAIT	2016-12-01 02:48:00	1.906				0.698
331	KAIT	2015-12-01 05:30:00	2.615			332	KAIT	2016-12-01 02:49:00	1.902				0.713
332	KAIT	2015-12-01 05:31:00	2.607			333	KAIT	2016-12-01 02:50:00	1.917				0.69
333	KAIT	2015-12-01 05:32:00	2.605			334	KAIT	2016-12-01 02:51:00	1.912				0.693
334	KAIT	2015-12-01 05:33:00	2.638			335	KAIT	2016-12-01 02:52:00	1.916				0.722
335	KAIT	2015-12-01 05:34:00	2.635			336	KAIT	2016-12-01 02:53:00	1.935				0.7
336	KAIT	2015-12-01 05:35:00	2.631			337	KAIT	2016-12-01 02:54:00	1.934				0.697
337	KAIT	2015-12-01 05:36:00	2.64			338	KAIT	2016-12-01 02:55:00	1.941				0.699
338	KAIT	2015-12-01 05:37:00	2.662			339	KAIT	2016-12-01 02:56:00	1.951				0.711
339	KAIT	2015-12-01 05:38:00	2.667			340	KAIT	2016-12-01 02:57:00	1.948				0.719
340	KAIT	2015-12-01 05:39:00	2.641			341	KAIT	2016-12-01 02:58:00	1.965				0.676
341	KAIT	2015-12-01 05:40:00	2.651			342	KAIT	2016-12-01 02:59:00	1.956				0.695
342	KAIT	2015-12-01 05:41:00	2.664			343	KAIT	2016-12-01 03:00:00	1.972				0.692
343	KAIT	2015-12-01 05:42:00	2.683			344	KAIT	2016-12-01 03:01:00	1.985				0.698
344	KAIT	2015-12-01 05:43:00	2.662			345	KAIT	2016-12-01 03:02:00	1.99				0.672
345	KAIT	2015-12-01 05:44:00	2.682			346	KAIT	2016-12-01 03:03:00	1.979				0.703
346	KAIT	2015-12-01 05:45:00	2.682			347	KAIT	2016-12-01 03:04:00	1.987				0.695
347	KAIT	2015-12-01 05:46:00	2.687			348	KAIT	2016-12-01 03:05:00	1.989				0.698
348	KAIT	2015-12-01 05:47:00	2.694			349	KAIT	2016-12-01 03:06:00	2.002				0.692
349	KAIT	2015-12-01 05:48:00	2.708			350	KAIT	2016-12-01 03:07:00	2.019				0.689
350	KAIT	2015-12-01 05:49:00	2.697			351	KAIT	2016-12-01 03:08:00	2.004				0.693
351	KAIT	2015-12-01 05:50:00	2.723			352	KAIT	2016-12-01 03:09:00	1.994				0.729
352	KAIT	2015-12-01 05:51:00	2.732			353	KAIT	2016-12-01 03:10:00	2.02				0.712
353	KAIT	2015-12-01 05:52:00	2.725			354	KAIT	2016-12-01 03:11:00	2.029				0.696
354	KAIT	2015-12-01 05:53:00	2.75			355	KAIT	2016-12-01 03:12:00	2.029				0.721
355	KAIT	2015-12-01 05:54:00	2.74			356	KAIT	2016-12-01 03:13:00	2.026				0.714
356	KAIT	2015-12-01 05:55:00	2.747			357	KAIT	2016-12-01 03:14:00	2.023				0.724
357	KAIT	2015-12-01 05:56:00	2.78			358	KAIT	2016-12-01 03:15:00	2.02				0.76
358	KAIT	2015-12-01 05:57:00	2.772			359	KAIT	2016-12-01 03:16:00	2.046				0.726
359	KAIT	2015-12-01 05:58:00	2.755			360	KAIT	2016-12-01 03:17:00	2.049				0.706
360	KAIT	2015-12-01 05:59:00	2.794			361	KAIT	2016-12-01 03:18:00	2.034				0.76
361	KAIT	2015-12-01 06:00:00	2.781			362	KAIT	2016-12-01 03:19:00	2.048				0.733
362	KAIT	2015-12-01 06:01:00	2.798			363	KAIT	2016-12-01 03:20:00	2.07				0.728
363	KAIT	2015-12-01 06:02:00	2.802			364	KAIT	2016-12-01 03:21:00	2.065				0.737
364	KAIT	2015-12-01 06:03:00	2.781			365	KAIT	2016-12-01 03:22:00	2.05				0.731
365	KAIT	2015-12-01 06:04:00	2.773			366	KAIT	2016-12-01 03:23:00	2.06				0.713
366	KAIT	2015-12-01 06:05:00	2.811			367	KAIT	2016-12-01 03:24:00	2.067				0.744
367	KAIT	2015-12-01 06:06:00	2.808			368	KAIT	2016-12-01 03:25:00	2.084				0.724
368	KAIT	2015-12-01 06:07:00	2.809			369	KAIT	2016-12-01 03:26:00	2.085				0.724
369	KAIT	2015-12-01 06:08:00	2.82			370	KAIT	2016-12-01 03:27:00	2.092				0.728
370	KAIT	2015-12-01 06:09:00	2.811			371	KAIT	2016-12-01 03:28:00	2.1				0.711
371	KAIT	2015-12-01 06:10:00	2.811			372	KAIT	2016-12-01 03:29:00	2.105				0.706
372	KAIT	2015-12-01 06:11:00	2.842			373	KAIT	2016-12-01 03:30:00	2.113				0.729
373	KAIT	2015-12-01 06:12:00	2.842			374	KAIT	2016-12-01 03:31:00	2.113				0.729
374	KAIT	2015-12-01 06:13:00	2.846			375	KAIT	2016-12-01 03:32:00	2.115				0.731
375	KAIT	2015-12-01 06:14:00	2.853			376	KAIT	2016-12-01 03:33:00	2.133				0.72
376	KAIT	2015-12-01 06:15:00	2.86			377	KAIT	2016-12-01 03:34:00	2.107				0.753
377	KAIT	2015-12-01 06:16:00	2.862			378	KAIT	2016-12-01 03:35:00	2.118				0.744
378	KAIT	2015-12-01 06:17:00	2.86			379	KAIT	2016-12-01 03:36:00	2.132				0.728
379	KAIT	2015-12-01 06:18:00	2.896			380	KAIT	2016-12-01 03:37:00	2.131				0.765
380	KAIT	2015-12-01 06:19:00	2.886			381	KAIT	2016-12-01 03:38:00	2.149				0.737
381	KAIT	2015-12-01 06:20:00	2.895			382	KAIT	2016-12-01 03:39:00	2.141				0.754
382	KAIT	2015-12-01 06:21:00	2.883			383	KAIT	2016-12-01 03:40:00	2.149				0.734
383	KAIT	2015-12-01 06:22:00	2.898			384	KAIT	2016-12-01 03:41:00	2.16				0.738
384	KAIT	2015-12-01 06:23:00	2.895			385	KAIT	2016-12-01 03:42:00	2.173				0.722
385	KAIT	2015-12-01 06:24:00	2.908			386	KAIT	2016-12-01 03:43:00	2.178				0.73
386	KAIT	2015-12-01 06:25:00	2.935			387	KAIT	2016-12-01 03:44:00	2.183				0.752
387	KAIT	2015-12-01 06:26:00	2.935			388	KAIT	2016-12-01 03:45:00	2.164				0.771
388	KAIT	2015-12-01 06:27:00	2.951			389	KAIT	2016-12-01 03:46:00	2.172				0.779
389	KAIT	2015-12-01 06:28:00	2.951			390	KAIT	2016-12-01 03:47:00	2.181				0.77
390	KAIT	2015-12-01 06:29:00	2.973			391	KAIT	2016-12-01 03:48:00	2.198				0.775
391	KAIT	2015-12-01 06:30:00	2.966			392	KAIT	2016-12-01 03:49:00	2.194				0.772
392	KAIT	2015-12-01 06:31:00	2.969			393	KAIT	2016-12-01 03:50:00	2.194				0.775
393	KAIT	2015-12-01 06:32:00	2.968			394	KAIT	2016-12-01 03:51:00	2.2				0.768
394	KAIT	2015-12-01 06:33:00	2.975			395	KAIT	2016-12-01 03:52:00	2.199				0.776
395	KAIT	2015-12-01 06:34:00	2.976			396	KAIT	2016-12-01 03:53:00	2.204				0.772
396	KAIT	2015-12-01 06:35:00	2.995			397	KAIT	2016-12-01 03:54:00	2.22				0.775
397	KAIT	2015-12-01 06:36:00	2.992			398	KAIT	2016-12-01 03:55:00	2.228				0.764
398	KAIT	2015-12-01 06:37:00	3.007			399	KAIT	2016-12-01 03:56:00	2.217				0.79
399	KAIT	2015-12-01 06:38:00	3.021			400	KAIT	2016-12-01 03:57:00	2.227				0.794
400	KAIT	2015-12-01 06:39:00	3.021			401	KAIT	2016-12-01 03:58:00	2.233				0.788
401	KAIT	2015-12-01 06:40:00	3.033			402	KAIT	2016-12-01 03:59:00	2.226				0.807
402	KAIT	2015-12-01 06:41:00	3.011			403	KAIT	2016-12-01 04:00:00	2.215				0.796
403	KAIT	2015-12-01 06:42:00	3.045			404	KAIT	2016-12-01 04:01:00	2.227				0.818
404	KAIT	2015-12-01 06:43:00	3.07			405	KAIT	2016-12-01 04:02:00	2.23				0.84
405	KAIT	2015-12-01 06:44:00	3.079			406	KAIT	2016-12-01 04:03:00	2.241				0.838
406	KAIT	2015-12-01 06:45:00	3.077			407	KAIT	2016-12-01 04:04:00	2.237				0.84
407	KAIT	2015-12-01 06:46:00	3.083			408	KAIT	2016-12-01 04:05:00	2.237				0.846
408	KAIT	2015-12-01 06:47:00	3.084			409	KAIT	2016-12-01 04:06:00	2.243				0.841
409	KAIT	2015-12-01 06:48:00	3.093			410	KAIT	2016-12-01 04:07:00	2.256				0.837
410	KAIT	2015-12-01 06:49:00	3.097			411	KAIT	2016-12-01 04:08:00	2.24				0.857
411	KAIT	2015-12-01 06:50:00	3.092			412	KAIT	2016-12-01 04:09:00	2.264				0.828
412	KAIT	2015-12-01 06:51:00	3.093			413	KAIT	2016-12-01 04:10:00	2.263				0.83
413	KAIT	2015-12-01 06:52:00	3.082			414	KAIT	2016-12-01 04:11:00	2.256				0.826
414	KAIT	2015-12-01 06:53:00	3.109			415	KAIT	2016-12-01 04:12:00	2.277				0.832
415	KAIT	2015-12-01 06:54:00	3.109			416	KAIT	2016-12-01 04:13:00	2.255				0.854
416	KAIT	2015-12-01 06:55:00	3.132			417	KAIT	2016-12-01 04:14:00	2.284				0.848
417	KAIT	2015-12-01 06:56:00	3.11			418	KAIT	2016-12-01 04:15:00	2.274				0.836
418	KAIT	2015-12-01 06:57:00	3.132			419	KAIT	2016-12-01 04:16:00	2.287				0.845
419	KAIT	2015-12-01 06:58:00	3.134			420	KAIT	2016-12-01 04:17:00	2.297				0.837
420	KAIT	2015-12-01 06:59:00	3.13			421	KAIT	2016-12-01 04:18:00	2.309				0.821
421	KAIT	2015-12-01 07:00:00	3.135			422	KAIT	2016-12-01 04:19:00	2.313				0.822
422	KAIT	2015-12-01 07:01:00	3.148			423	KAIT	2016-12-01 04:20:00	2.334				0.814
423	KAIT	2015-12-01 07:02:00	3.139			424	KAIT	2016-12-01 04:21:00	2.313				0.826
424	KAIT	2015-12-01 07:03:00	3.161			425	KAIT	2016-12-01 04:22:00	2.331				0.83
425	KAIT	2015-12-01 07:04:00	3.159			426	KAIT	2016-12-01 04:23:00	2.321				0.838
426	KAIT	2015-12-01 07:05:00	3.18			427	KAIT	2016-12-01 04:24:00	2.327				0.853
427	KAIT	2015-12-01 07:06:00	3.166			428	KAIT	2016-12-01 04:25:00	2.31				0.856
428	KAIT	2015-12-01 07:07:00	3.186			429	KAIT	2016-12-01 04:26:00	2.321				0.865
429	KAIT	2015-12-01 07:08:00	3.182			430	KAIT	2016-12-01 04:27:00	2.327				0.855
430	KAIT	2015-12-01 07:09:00	3.202			431	KAIT	2016-12-01 04:28:00	2.332				0.87
431	KAIT	2015-12-01 07:10:00	3.212			432	KAIT	2016-12-01 04:29:00	2.337				0.875
432	KAIT	2015-12-01 07:11:00	3.196			433	KAIT	2016-12-01 04:30:00	2.341				0.855
433	KAIT	2015-12-01 07:12:00	3.212			434	KAIT	2016-12-01 04:31:00	2.346				0.866
434	KAIT	2015-12-01 07:13:00	3.21			435	KAIT	2016-12-01 04:32:00	2.352				0.858
435	KAIT	2015-12-01 07:14:00	3.223			436	KAIT	2016-12-01 04:33:00	2.358				0.865
436	KAIT	2015-12-01 07:15:00	3.222			437	KAIT	2016-12-01 04:34:00	2.353				0.869
437	KAIT	2015-12-01 07:16:00	3.242			438	KAIT	2016-12-01 04:35:00	2.358				0.884
438	KAIT	2015-12-01 07:17:00	3.252			439	KAIT	2016-12-01 04:36:00	2.372				0.88
439	KAIT	2015-12-01 07:18:00	3.254			440	KAIT	2016-12-01 04:37:00	2.364				0.89
440	KAIT	2015-12-01 07:19:00	3.249			441	KAIT	2016-12-01 04:38:00	2.368				0.881
441	KAIT	2015-12-01 07:20:00	3.273			442	KAIT	2016-12-01 04:39:00	2.368				0.905
442	KAIT	2015-12-01 07:21:00	3.268			443	KAIT	2016-12-01 04:40:00	2.382				0.886
443	KAIT	2015-12-01 07:22:00	3.286			444	KAIT	2016-12-01 04:41:00	2.386				0.9
444	KAIT	2015-12-01 07:23:00	3.281			445	KAIT	2016-12-01 04:42:00	2.39				0.891
445	KAIT	2015-12-01 07:24:00	3.281			446	KAIT	2016-12-01 04:43:00	2.402				0.879
446	KAIT	2015-12-01 07:25:00	3.286			447	KAIT	2016-12-01 04:44:00	2.394				0.892
447	KAIT	2015-12-01 07:26:00	3.287			448	KAIT	2016-12-01 04:45:00	2.401				0.886
448	KAIT	2015-12-01 07:27:00	3.296			449	KAIT	2016-12-01 04:46:00	2.398				0.898
449	KAIT	2015-12-01 07:28:00	3.284			450	KAIT	2016-12-01 04:47:00	2.406				0.878
450	KAIT	2015-12-01 07:29:00	3.319			451	KAIT	2016-12-01 04:48:00	2.393				0.926
451	KAIT	2015-12-01 07:30:00	3.311			452	KAIT	2016-12-01 04:49:00	2.414				0.897
452	KAIT	2015-12-01 07:31:00	3.32			453	KAIT	2016-12-01 04:50:00	2.412				0.908
453	KAIT	2015-12-01 07:32:00	3.305			454	KAIT	2016-12-01 04:51:00	2.41				0.895
454	KAIT	2015-12-01 07:33:00	3.335			455	KAIT	2016-12-01 04:52:00	2.406				0.929
455	KAIT	2015-12-01 07:34:00	3.351			456	KAIT	2016-12-01 04:53:00	2.399				0.952
456	KAIT	2015-12-01 07:35:00	3.332			457	KAIT	2016-12-01 04:54:00	2.417				0.915
457	KAIT	2015-12-01 07:36:00	3.342			458	KAIT	2016-12-01 04:55:00	2.397				0.945
458	KAIT	2015-12-01 07:37:00	3.349			459	KAIT	2016-12-01 04:56:00	2.398				0.951
459	KAIT	2015-12-01 07:38:00	3.342			460	KAIT	2016-12-01 04:57:00	2.426				0.916
460	KAIT	2015-12-01 07:39:00	3.351			461	KAIT	2016-12-01 04:58:00	2.421				0.93
461	KAIT	2015-12-01 07:40:00	3.363			462	KAIT	2016-12-01 04:59:00	2.437				0.926
462	KAIT	2015-12-01 07:41:00	3.364			463	KAIT	2016-12-01 05:00:00	2.438				0.926
463	KAIT	2015-12-01 07:42:00	3.349			464	KAIT	2016-12-01 05:01:00	2.441				0.908
464	KAIT	2015-12-01 07:43:00	3.366			465	KAIT	2016-12-01 05:02:00	2.441				0.925
465	KAIT	2015-12-01 07:44:00	3.374			466	KAIT	2016-12-01 05:03:00	2.433				0.941
466	KAIT	2015-12-01 07:45:00	3.384			467	KAIT	2016-12-01 05:04:00	2.437				0.947
467	KAIT	2015-12-01 07:46:00	3.394			468	KAIT	2016-12-01 05:05:00	2.452				0.942
468	KAIT	2015-12-01 07:47:00	3.407			469	KAIT	2016-12-01 05:06:00	2.442				0.965
469	KAIT	2015-12-01 07:48:00	3.399			470	KAIT	2016-12-01 05:07:00	2.458				0.941
470	KAIT	2015-12-01 07:49:00	3.396			471	KAIT	2016-12-01 05:08:00	2.452				0.944
471	KAIT	2015-12-01 07:50:00	3.425			472	KAIT	2016-12-01 05:09:00	2.458				0.967
472	KAIT	2015-12-01 07:51:00	3.43			473	KAIT	2016-12-01 05:10:00	2.463				0.967
473	KAIT	2015-12-01 07:52:00	3.45			474	KAIT	2016-12-01 05:11:00	2.476				0.974
474	KAIT	2015-12-01 07:53:00	3.45			475	KAIT	2016-12-01 05:12:00	2.476				0.974
475	KAIT	2015-12-01 07:54:00	3.449			476	KAIT	2016-12-01 05:13:00	2.464				0.985
476	KAIT	2015-12-01 07:55:00	3.435			477	KAIT	2016-12-01 05:14:00	2.457				0.978
477	KAIT	2015-12-01 07:56:00	3.453			478	KAIT	2016-12-01 05:15:00	2.478				0.975
478	KAIT	2015-12-01 07:57:00	3.454			479	KAIT	2016-12-01 05:16:00	2.479				0.975
479	KAIT	2015-12-01 07:58:00	3.463			480	KAIT	2016-12-01 05:17:00	2.469				0.994
480	KAIT	2015-12-01 07:59:00	3.46			481	KAIT	2016-12-01 05:18:00	2.471				0.989
481	KAIT	2015-12-01 08:00:00	3.467			482	KAIT	2016-12-01 05:19:00	2.475				0.992
482	KAIT	2015-12-01 08:01:00	3.469			483	KAIT	2016-12-01 05:20:00	2.464				1.005
483	KAIT	2015-12-01 08:02:00	3.469			484	KAIT	2016-12-01 05:21:00	2.475				0.994
484	KAIT	2015-12-01 08:03:00	3.457			485	KAIT	2016-12-01 05:22:00	2.489				0.968
485	KAIT	2015-12-01 08:04:00	3.46			486	KAIT	2016-12-01 05:23:00	2.489				0.971
486	KAIT	2015-12-01 08:05:00	3.471			487	KAIT	2016-12-01 05:24:00	2.471				1
487	KAIT	2015-12-01 08:06:00	3.472			488	KAIT	2016-12-01 05:25:00	2.481				0.991
488	KAIT	2015-12-01 08:07:00	3.484			489	KAIT	2016-12-01 05:26:00	2.493				0.991
489	KAIT	2015-12-01 08:08:00	3.483			490	KAIT	2016-12-01 05:27:00	2.489				0.994
490	KAIT	2015-12-01 08:09:00	3.468			491	KAIT	2016-12-01 05:28:00	2.495				0.973
491	KAIT	2015-12-01 08:10:00	3.484			492	KAIT	2016-12-01 05:29:00	2.489				0.995
492	KAIT	2015-12-01 08:11:00	3.511			493	KAIT	2016-12-01 05:30:00	2.486				1.025
493	KAIT	2015-12-01 08:12:00	3.496			494	KAIT	2016-12-01 05:31:00	2.503				0.993
494	KAIT	2015-12-01 08:13:00	3.514			495	KAIT	2016-12-01 05:32:00	2.513				1.001
495	KAIT	2015-12-01 08:14:00	3.495			496	KAIT	2016-12-01 05:33:00	2.514				0.981
496	KAIT	2015-12-01 08:15:00	3.505			497	KAIT	2016-12-01 05:34:00	2.507				0.998
497	KAIT	2015-12-01 08:16:00	3.528			498	KAIT	2016-12-01 05:35:00	2.512				1.016
498	KAIT	2015-12-01 08:17:00	3.531			499	KAIT	2016-12-01 05:36:00	2.512				1.019
499	KAIT	2015-12-01 08:18:00	3.541			500	KAIT	2016-12-01 05:37:00	2.498				1.043
500	KAIT	2015-12-01 08:19:00	3.535			501	KAIT	2016-12-01 05:38:00	2.506				1.029
501	KAIT	2015-12-01 08:20:00	3.532			502	KAIT	2016-12-01 05:39:00	2.52				1.012
502	KAIT	2015-12-01 08:21:00	3.535			503	KAIT	2016-12-01 05:40:00	2.507				1.028
503	KAIT	2015-12-01 08:22:00	3.551			504	KAIT	2016-12-01 05:41:00	2.508				1.043
504	KAIT	2015-12-01 08:23:00	3.551			505	KAIT	2016-12-01 05:42:00	2.496				1.055
505	KAIT	2015-12-01 08:24:00	3.549			506	KAIT	2016-12-01 05:43:00	2.503				1.046
506	KAIT	2015-12-01 08:25:00	3.563			507	KAIT	2016-12-01 05:44:00	2.497				1.066
507	KAIT	2015-12-01 08:26:00	3.547			508	KAIT	2016-12-01 05:45:00	2.51				1.037
508	KAIT	2015-12-01 08:27:00	3.581			509	KAIT	2016-12-01 05:46:00	2.51				1.071
509	KAIT	2015-12-01 08:28:00	3.555			510	KAIT	2016-12-01 05:47:00	2.505				1.05
510	KAIT	2015-12-01 08:29:00	3.573			511	KAIT	2016-12-01 05:48:00	2.514				1.059
511	KAIT	2015-12-01 08:30:00	3.584			512	KAIT	2016-12-01 05:49:00	2.52				1.064
512	KAIT	2015-12-01 08:31:00	3.557			513	KAIT	2016-12-01 05:50:00	2.532				1.025
513	KAIT	2015-12-01 08:32:00	3.598			514	KAIT	2016-12-01 05:51:00	2.521				1.077
514	KAIT	2015-12-01 08:33:00	3.577			515	KAIT	2016-12-01 05:52:00	2.522				1.055
515	KAIT	2015-12-01 08:34:00	3.588			516	KAIT	2016-12-01 05:53:00	2.519				1.069
516	KAIT	2015-12-01 08:35:00	3.575			517	KAIT	2016-12-01 05:54:00	2.54				1.035
517	KAIT	2015-12-01 08:36:00	3.601			518	KAIT	2016-12-01 05:55:00	2.532				1.069
518	KAIT	2015-12-01 08:37:00	3.589			519	KAIT	2016-12-01 05:56:00	2.542				1.047
519	KAIT	2015-12-01 08:38:00	3.577			520	KAIT	2016-12-01 05:57:00	2.518				1.059
520	KAIT	2015-12-01 08:39:00	3.575			521	KAIT	2016-12-01 05:58:00	2.532				1.043
521	KAIT	2015-12-01 08:40:00	3.579			522	KAIT	2016-12-01 05:59:00	2.546				1.033
522	KAIT	2015-12-01 08:41:00	3.592			523	KAIT	2016-12-01 06:00:00	2.533				1.059
523	KAIT	2015-12-01 08:42:00	3.599			524	KAIT	2016-12-01 06:01:00	2.535				1.064
524	KAIT	2015-12-01 08:43:00	3.612			525	KAIT	2016-12-01 06:02:00	2.538				1.074
525	KAIT	2015-12-01 08:44:00	3.589			526	KAIT	2016-12-01 06:03:00	2.536				1.053
526	KAIT	2015-12-01 08:45:00	3.593			527	KAIT	2016-12-01 06:04:00	2.525				1.068
527	KAIT	2015-12-01 08:46:00	3.607			528	KAIT	2016-12-01 06:05:00	2.529				1.078
528	KAIT	2015-12-01 08:47:00	3.617			529	KAIT	2016-12-01 06:06:00	2.54				1.077
529	KAIT	2015-12-01 08:48:00	3.625			530	KAIT	2016-12-01 06:07:00	2.542				1.083
530	KAIT	2015-12-01 08:49:00	3.58			531	KAIT	2016-12-01 06:08:00	2.528				1.052
531	KAIT	2015-12-01 08:50:00	3.589			532	KAIT	2016-12-01 06:09:00	2.528				1.061
532	KAIT	2015-12-01 08:51:00	3.596			533	KAIT	2016-12-01 06:10:00	2.534				1.062
533	KAIT	2015-12-01 08:52:00	3.613			534	KAIT	2016-12-01 06:11:00	2.52				1.093
534	KAIT	2015-12-01 08:53:00	3.615			535	KAIT	2016-12-01 06:12:00	2.515				1.1
535	KAIT	2015-12-01 08:54:00	3.613			536	KAIT	2016-12-01 06:13:00	2.522				1.091
536	KAIT	2015-12-01 08:55:00	3.621			537	KAIT	2016-12-01 06:14:00	2.515				1.106
537	KAIT	2015-12-01 08:56:00	3.623			538	KAIT	2016-12-01 06:15:00	2.519				1.104
538	KAIT	2015-12-01 08:57:00	3.655			539	KAIT	2016-12-01 06:16:00	2.508				1.147
539	KAIT	2015-12-01 08:58:00	3.652			540	KAIT	2016-12-01 06:17:00	2.517				1.135
540	KAIT	2015-12-01 08:59:00	3.632			541	KAIT	2016-12-01 06:18:00	2.523				1.109
541	KAIT	2015-12-01 09:00:00	3.66			542	KAIT	2016-12-01 06:19:00	2.515				1.145
542	KAIT	2015-12-01 09:01:00	3.656			543	KAIT	2016-12-01 06:20:00	2.513				1.143
543	KAIT	2015-12-01 09:02:00	3.664			544	KAIT	2016-12-01 06:21:00	2.533				1.131
544	KAIT	2015-12-01 09:03:00	3.657			545	KAIT	2016-12-01 06:22:00	2.523				1.134
545	KAIT	2015-12-01 09:04:00	3.64			546	KAIT	2016-12-01 06:23:00	2.516				1.124
546	KAIT	2015-12-01 09:05:00	3.633			547	KAIT	2016-12-01 06:24:00	2.531				1.102
547	KAIT	2015-12-01 09:06:00	3.649			548	KAIT	2016-12-01 06:25:00	2.527				1.122
548	KAIT	2015-12-01 09:07:00	3.642			549	KAIT	2016-12-01 06:26:00	2.537				1.105
549	KAIT	2015-12-01 09:08:00	3.633			550	KAIT	2016-12-01 06:27:00	2.522				1.111
550	KAIT	2015-12-01 09:09:00	3.644			551	KAIT	2016-12-01 06:28:00	2.523				1.121
551	KAIT	2015-12-01 09:10:00	3.647			552	KAIT	2016-12-01 06:29:00	2.521				1.126
552	KAIT	2015-12-01 09:11:00	3.625			553	KAIT	2016-12-01 06:30:00	2.506				1.119
553	KAIT	2015-12-01 09:12:00	3.634			554	KAIT	2016-12-01 06:31:00	2.539				1.095
554	KAIT	2015-12-01 09:13:00	3.617			555	KAIT	2016-12-01 06:32:00	2.533				1.084
555	KAIT	2015-12-01 09:14:00	3.641			556	KAIT	2016-12-01 06:33:00	2.523				1.118
556	KAIT	2015-12-01 09:15:00	3.633			557	KAIT	2016-12-01 06:34:00	2.521				1.112
557	KAIT	2015-12-01 09:16:00	3.629			558	KAIT	2016-12-01 06:35:00	2.516				1.113
558	KAIT	2015-12-01 09:17:00	3.622			559	KAIT	2016-12-01 06:36:00	2.54				1.082
559	KAIT	2015-12-01 09:18:00	3.628			560	KAIT	2016-12-01 06:37:00	2.526				1.102
560	KAIT	2015-12-01 09:19:00	3.619			561	KAIT	2016-12-01 06:38:00	2.52				1.099
561	KAIT	2015-12-01 09:20:00	3.632			562	KAIT	2016-12-01 06:39:00	2.527				1.105
562	KAIT	2015-12-01 09:21:00	3.647			563	KAIT	2016-12-01 06:40:00	2.523				1.124
563	KAIT	2015-12-01 09:22:00	3.629			564	KAIT	2016-12-01 06:41:00	2.528				1.101
564	KAIT	2015-12-01 09:23:00	3.63			565	KAIT	2016-12-01 06:42:00	2.532				1.098
565	KAIT	2015-12-01 09:24:00	3.643			566	KAIT	2016-12-01 06:43:00	2.52				1.123
566	KAIT	2015-12-01 09:25:00	3.632			567	KAIT	2016-12-01 06:44:00	2.515				1.117
567	KAIT	2015-12-01 09:26:00	3.647			568	KAIT	2016-12-01 06:45:00	2.513				1.134
568	KAIT	2015-12-01 09:27:00	3.658			569	KAIT	2016-12-01 06:46:00	2.52				1.138
569	KAIT	2015-12-01 09:28:00	3.635			570	KAIT	2016-12-01 06:47:00	2.534				1.101
570	KAIT	2015-12-01 09:29:00	3.656			571	KAIT	2016-12-01 06:48:00	2.513				1.143
571	KAIT	2015-12-01 09:30:00	3.66			572	KAIT	2016-12-01 06:49:00	2.502				1.158
572	KAIT	2015-12-01 09:31:00	3.632			573	KAIT	2016-12-01 06:50:00	2.501				1.131
573	KAIT	2015-12-01 09:32:00	3.654			574	KAIT	2016-12-01 06:51:00	2.517				1.137
574	KAIT	2015-12-01 09:33:00	3.653			575	KAIT	2016-12-01 06:52:00	2.507				1.146
575	KAIT	2015-12-01 09:34:00	3.64			576	KAIT	2016-12-01 06:53:00	2.483				1.157
576	KAIT	2015-12-01 09:35:00	3.631			577	KAIT	2016-12-01 06:54:00	2.482				1.149
577	KAIT	2015-12-01 09:36:00	3.65			578	KAIT	2016-12-01 06:55:00	2.484				1.166
578	KAIT	2015-12-01 09:37:00	3.633			579	KAIT	2016-12-01 06:56:00	2.481				1.152
579	KAIT	2015-12-01 09:38:00	3.626			580	KAIT	2016-12-01 06:57:00	2.488				1.138
580	KAIT	2015-12-01 09:39:00	3.616			581	KAIT	2016-12-01 06:58:00	2.463				1.153
581	KAIT	2015-12-01 09:40:00	3.646			582	KAIT	2016-12-01 06:59:00	2.485				1.161
582	KAIT	2015-12-01 09:41:00	3.624			583	KAIT	2016-12-01 07:00:00	2.478				1.146
583	KAIT	2015-12-01 09:42:00	3.632			584	KAIT	2016-12-01 07:01:00	2.49				1.142
584	KAIT	2015-12-01 09:43:00	3.638			585	KAIT	2016-12-01 07:02:00	2.491				1.147
585	KAIT	2015-12-01 09:44:00	3.636			586	KAIT	2016-12-01 07:03:00	2.49				1.146
586	KAIT	2015-12-01 09:45:00	3.636			587	KAIT	2016-12-01 07:04:00	2.491				1.145
587	KAIT	2015-12-01 09:46:00	3.615			588	KAIT	2016-12-01 07:05:00	2.49				1.125
588	KAIT	2015-12-01 09:47:00	3.623			589	KAIT	2016-12-01 07:06:00	2.493				1.13
589	KAIT	2015-12-01 09:48:00	3.607			590	KAIT	2016-12-01 07:07:00	2.48				1.127
590	KAIT	2015-12-01 09:49:00	3.614			591	KAIT	2016-12-01 07:08:00	2.48				1.134
591	KAIT	2015-12-01 09:50:00	3.631			592	KAIT	2016-12-01 07:09:00	2.476				1.155
592	KAIT	2015-12-01 09:51:00	3.621			593	KAIT	2016-12-01 07:10:00	2.489				1.132
593	KAIT	2015-12-01 09:52:00	3.629			594	KAIT	2016-12-01 07:11:00	2.492				1.137
594	KAIT	2015-12-01 09:53:00	3.618			595	KAIT	2016-12-01 07:12:00	2.475				1.143
595	KAIT	2015-12-01 09:54:00	3.626			596	KAIT	2016-12-01 07:13:00	2.49				1.136
596	KAIT	2015-12-01 09:55:00	3.618			597	KAIT	2016-12-01 07:14:00	2.48				1.138
597	KAIT	2015-12-01 09:56:00	3.6			598	KAIT	2016-12-01 07:15:00	2.477				1.123
598	KAIT	2015-12-01 09:57:00	3.601			599	KAIT	2016-12-01 07:16:00	2.487				1.114
599	KAIT	2015-12-01 09:58:00	3.625			600	KAIT	2016-12-01 07:17:00	2.481				1.144
600	KAIT	2015-12-01 09:59:00	3.616			601	KAIT	2016-12-01 07:18:00	2.47				1.146
601	KAIT	2015-12-01 10:00:00	3.616			602	KAIT	2016-12-01 07:19:00	2.462				1.154
602	KAIT	2015-12-01 10:01:00	3.615			603	KAIT	2016-12-01 07:20:00	2.467				1.148
603	KAIT	2015-12-01 10:02:00	3.589			604	KAIT	2016-12-01 07:21:00	2.454				1.135
604	KAIT	2015-12-01 10:03:00	3.6			605	KAIT	2016-12-01 07:22:00	2.459				1.141
605	KAIT	2015-12-01 10:04:00	3.603			606	KAIT	2016-12-01 07:23:00	2.446				1.157
606	KAIT	2015-12-01 10:05:00	3.585			607	KAIT	2016-12-01 07:24:00	2.451				1.134
607	KAIT	2015-12-01 10:06:00	3.601			608	KAIT	2016-12-01 07:25:00	2.44				1.161
608	KAIT	2015-12-01 10:07:00	3.583			609	KAIT	2016-12-01 07:26:00	2.439				1.144
609	KAIT	2015-12-01 10:08:00	3.591			610	KAIT	2016-12-01 07:27:00	2.434				1.157
610	KAIT	2015-12-01 10:09:00	3.595			611	KAIT	2016-12-01 07:28:00	2.427				1.168
611	KAIT	2015-12-01 10:10:00	3.604			612	KAIT	2016-12-01 07:29:00	2.427				1.177
612	KAIT	2015-12-01 10:11:00	3.589			613	KAIT	2016-12-01 07:30:00	2.415				1.174
613	KAIT	2015-12-01 10:12:00	3.58			614	KAIT	2016-12-01 07:31:00	2.427				1.153
614	KAIT	2015-12-01 10:13:00	3.583			615	KAIT	2016-12-01 07:32:00	2.41				1.173
615	KAIT	2015-12-01 10:14:00	3.572			616	KAIT	2016-12-01 07:33:00	2.444				1.128
616	KAIT	2015-12-01 10:15:00	3.566			617	KAIT	2016-12-01 07:34:00	2.417				1.149
617	KAIT	2015-12-01 10:16:00	3.579			618	KAIT	2016-12-01 07:35:00	2.418				1.161
618	KAIT	2015-12-01 10:17:00	3.581			619	KAIT	2016-12-01 07:36:00	2.419				1.162
619	KAIT	2015-12-01 10:18:00	3.588			620	KAIT	2016-12-01 07:37:00	2.417				1.171
620	KAIT	2015-12-01 10:19:00	3.563			621	KAIT	2016-12-01 07:38:00	2.411				1.152
621	KAIT	2015-12-01 10:20:00	3.572			622	KAIT	2016-12-01 07:39:00	2.419				1.153
622	KAIT	2015-12-01 10:21:00	3.538			623	KAIT	2016-12-01 07:40:00	2.408				1.13
623	KAIT	2015-12-01 10:22:00	3.538			624	KAIT	2016-12-01 07:41:00	2.406				1.132
624	KAIT	2015-12-01 10:23:00	3.545			625	KAIT	2016-12-01 07:42:00	2.407				1.138
625	KAIT	2015-12-01 10:24:00	3.534			626	KAIT	2016-12-01 07:43:00	2.401				1.133
626	KAIT	2015-12-01 10:25:00	3.529			627	KAIT	2016-12-01 07:44:00	2.392				1.137
627	KAIT	2015-12-01 10:26:00	3.526			628	KAIT	2016-12-01 07:45:00	2.397				1.129
628	KAIT	2015-12-01 10:27:00	3.548			629	KAIT	2016-12-01 07:46:00	2.399				1.149
629	KAIT	2015-12-01 10:28:00	3.525			630	KAIT	2016-12-01 07:47:00	2.392				1.133
630	KAIT	2015-12-01 10:29:00	3.539			631	KAIT	2016-12-01 07:48:00	2.397				1.142
631	KAIT	2015-12-01 10:30:00	3.54			632	KAIT	2016-12-01 07:49:00	2.392				1.148
632	KAIT	2015-12-01 10:31:00	3.525			633	KAIT	2016-12-01 07:50:00	2.375				1.15
633	KAIT	2015-12-01 10:32:00	3.523			634	KAIT	2016-12-01 07:51:00	2.381				1.142
634	KAIT	2015-12-01 10:33:00	3.519			635	KAIT	2016-12-01 07:52:00	2.378				1.141
635	KAIT	2015-12-01 10:34:00	3.52			636	KAIT	2016-12-01 07:53:00	2.373				1.147
636	KAIT	2015-12-01 10:35:00	3.504			637	KAIT	2016-12-01 07:54:00	2.369				1.135
637	KAIT	2015-12-01 10:36:00	3.514			638	KAIT	2016-12-01 07:55:00	2.377				1.137
638	KAIT	2015-12-01 10:37:00	3.511			639	KAIT	2016-12-01 07:56:00	2.365				1.146
639	KAIT	2015-12-01 10:38:00	3.466			640	KAIT	2016-12-01 07:57:00	2.343				1.123
640	KAIT	2015-12-01 10:39:00	3.492			641	KAIT	2016-12-01 07:58:00	2.356				1.136
641	KAIT	2015-12-01 10:40:00	3.501			642	KAIT	2016-12-01 07:59:00	2.345				1.156
642	KAIT	2015-12-01 10:41:00	3.464			643	KAIT	2016-12-01 08:00:00	2.338				1.126
643	KAIT	2015-12-01 10:42:00	3.481			644	KAIT	2016-12-01 08:01:00	2.327				1.154
644	KAIT	2015-12-01 10:43:00	3.471			645	KAIT	2016-12-01 08:02:00	2.338				1.133
645	KAIT	2015-12-01 10:44:00	3.463			646	KAIT	2016-12-01 08:03:00	2.342				1.121
646	KAIT	2015-12-01 10:45:00	3.444			647	KAIT	2016-12-01 08:04:00	2.315				1.129
647	KAIT	2015-12-01 10:46:00	3.446			648	KAIT	2016-12-01 08:05:00	2.317				1.129
648	KAIT	2015-12-01 10:47:00	3.455			649	KAIT	2016-12-01 08:06:00	2.316				1.139
649	KAIT	2015-12-01 10:48:00	3.457			650	KAIT	2016-12-01 08:07:00	2.306				1.151
650	KAIT	2015-12-01 10:49:00	3.44			651	KAIT	2016-12-01 08:08:00	2.291				1.149
651	KAIT	2015-12-01 10:50:00	3.422			652	KAIT	2016-12-01 08:09:00	2.313				1.109
652	KAIT	2015-12-01 10:51:00	3.414			653	KAIT	2016-12-01 08:10:00	2.312				1.102
653	KAIT	2015-12-01 10:52:00	3.436			654	KAIT	2016-12-01 08:11:00	2.286				1.15
654	KAIT	2015-12-01 10:53:00	3.425			655	KAIT	2016-12-01 08:12:00	2.284				1.141
655	KAIT	2015-12-01 10:54:00	3.42			656	KAIT	2016-12-01 08:13:00	2.289				1.131
656	KAIT	2015-12-01 10:55:00	3.412			657	KAIT	2016-12-01 08:14:00	2.3				1.112
657	KAIT	2015-12-01 10:56:00	3.415			658	KAIT	2016-12-01 08:15:00	2.28				1.135
658	KAIT	2015-12-01 10:57:00	3.403			659	KAIT	2016-12-01 08:16:00	2.266				1.137
659	KAIT	2015-12-01 10:58:00	3.405			660	KAIT	2016-12-01 08:17:00	2.284				1.121
660	KAIT	2015-12-01 10:59:00	3.42			661	KAIT	2016-12-01 08:18:00	2.273				1.147
661	KAIT	2015-12-01 11:00:00	3.413			662	KAIT	2016-12-01 08:19:00	2.254				1.159
662	KAIT	2015-12-01 11:01:00	3.418			663	KAIT	2016-12-01 08:20:00	2.263				1.155
663	KAIT	2015-12-01 11:02:00	3.424			664	KAIT	2016-12-01 08:21:00	2.258				1.166
664	KAIT	2015-12-01 11:03:00	3.398			665	KAIT	2016-12-01 08:22:00	2.244				1.154
665	KAIT	2015-12-01 11:04:00	3.412			666	KAIT	2016-12-01 08:23:00	2.251				1.161
666	KAIT	2015-12-01 11:05:00	3.404			667	KAIT	2016-12-01 08:24:00	2.249				1.155
667	KAIT	2015-12-01 11:06:00	3.413			668	KAIT	2016-12-01 08:25:00	2.25				1.163
668	KAIT	2015-12-01 11:07:00	3.372			669	KAIT	2016-12-01 08:26:00	2.23				1.142
669	KAIT	2015-12-01 11:08:00	3.37			670	KAIT	2016-12-01 08:27:00	2.233				1.137
670	KAIT	2015-12-01 11:09:00	3.35			671	KAIT	2016-12-01 08:28:00	2.228				1.122
671	KAIT	2015-12-01 11:10:00	3.388			672	KAIT	2016-12-01 08:29:00	2.23				1.158
672	KAIT	2015-12-01 11:11:00	3.348			673	KAIT	2016-12-01 08:30:00	2.223				1.125
673	KAIT	2015-12-01 11:12:00	3.361			674	KAIT	2016-12-01 08:31:00	2.213				1.148
674	KAIT	2015-12-01 11:13:00	3.361			675	KAIT	2016-12-01 08:32:00	2.221				1.14
675	KAIT	2015-12-01 11:14:00	3.327			676	KAIT	2016-12-01 08:33:00	2.205				1.122
676	KAIT	2015-12-01 11:15:00	3.34			677	KAIT	2016-12-01 08:34:00	2.18				1.16
677	KAIT	2015-12-01 11:16:00	3.354			678	KAIT	2016-12-01 08:35:00	2.2				1.154
678	KAIT	2015-12-01 11:17:00	3.331			679	KAIT	2016-12-01 08:36:00	2.191				1.14
679	KAIT	2015-12-01 11:18:00	3.314			680	KAIT	2016-12-01 08:37:00	2.201				1.113
680	KAIT	2015-12-01 11:19:00	3.316			681	KAIT	2016-12-01 08:38:00	2.182				1.134
681	KAIT	2015-12-01 11:20:00	3.318			682	KAIT	2016-12-01 08:39:00	2.178				1.14
682	KAIT	2015-12-01 11:21:00	3.339			683	KAIT	2016-12-01 08:40:00	2.166				1.173
683	KAIT	2015-12-01 11:22:00	3.314			684	KAIT	2016-12-01 08:41:00	2.18				1.134
684	KAIT	2015-12-01 11:23:00	3.295			685	KAIT	2016-12-01 08:42:00	2.161				1.134
685	KAIT	2015-12-01 11:24:00	3.281			686	KAIT	2016-12-01 08:43:00	2.139				1.142
686	KAIT	2015-12-01 11:25:00	3.298			687	KAIT	2016-12-01 08:44:00	2.131				1.167
687	KAIT	2015-12-01 11:26:00	3.305			688	KAIT	2016-12-01 08:45:00	2.155				1.15
688	KAIT	2015-12-01 11:27:00	3.293			689	KAIT	2016-12-01 08:46:00	2.137				1.156
689	KAIT	2015-12-01 11:28:00	3.306			690	KAIT	2016-12-01 08:47:00	2.114				1.192
690	KAIT	2015-12-01 11:29:00	3.291			691	KAIT	2016-12-01 08:48:00	2.13				1.161
691	KAIT	2015-12-01 11:30:00	3.28			692	KAIT	2016-12-01 08:49:00	2.123				1.157
692	KAIT	2015-12-01 11:31:00	3.287			693	KAIT	2016-12-01 08:50:00	2.123				1.164
693	KAIT	2015-12-01 11:32:00	3.253			694	KAIT	2016-12-01 08:51:00	2.123				1.13
694	KAIT	2015-12-01 11:33:00	3.263			695	KAIT	2016-12-01 08:52:00	2.108				1.155
695	KAIT	2015-12-01 11:34:00	3.248			696	KAIT	2016-12-01 08:53:00	2.105				1.143
696	KAIT	2015-12-01 11:35:00	3.253			697	KAIT	2016-12-01 08:54:00	2.098				1.155
697	KAIT	2015-12-01 11:36:00	3.243			698	KAIT	2016-12-01 08:55:00	2.087				1.156
698	KAIT	2015-12-01 11:37:00	3.232			699	KAIT	2016-12-01 08:56:00	2.102				1.13
699	KAIT	2015-12-01 11:38:00	3.251			700	KAIT	2016-12-01 08:57:00	2.074				1.177
700	KAIT	2015-12-01 11:39:00	3.231			701	KAIT	2016-12-01 08:58:00	2.066				1.165
701	KAIT	2015-12-01 11:40:00	3.202			702	KAIT	2016-12-01 08:59:00	2.067				1.135
702	KAIT	2015-12-01 11:41:00	3.21			703	KAIT	2016-12-01 09:00:00	2.06				1.15
703	KAIT	2015-12-01 11:42:00	3.184			704	KAIT	2016-12-01 09:01:00	2.051				1.133
704	KAIT	2015-12-01 11:43:00	3.186			705	KAIT	2016-12-01 09:02:00	2.055				1.131
705	KAIT	2015-12-01 11:44:00	3.178			706	KAIT	2016-12-01 09:03:00	2.045				1.133
706	KAIT	2015-12-01 11:45:00	3.178			707	KAIT	2016-12-01 09:04:00	2.065				1.113
707	KAIT	2015-12-01 11:46:00	3.175			708	KAIT	2016-12-01 09:05:00	2.062				1.113
708	KAIT	2015-12-01 11:47:00	3.161			709	KAIT	2016-12-01 09:06:00	2.061				1.1
709	KAIT	2015-12-01 11:48:00	3.174			710	KAIT	2016-12-01 09:07:00	2.053				1.121
710	KAIT	2015-12-01 11:49:00	3.181			711	KAIT	2016-12-01 09:08:00	2.058				1.123
711	KAIT	2015-12-01 11:50:00	3.184			712	KAIT	2016-12-01 09:09:00	2.058				1.126
712	KAIT	2015-12-01 11:51:00	3.181			713	KAIT	2016-12-01 09:10:00	2.021				1.16
713	KAIT	2015-12-01 11:52:00	3.145			714	KAIT	2016-12-01 09:11:00	2.041				1.104
714	KAIT	2015-12-01 11:53:00	3.155			715	KAIT	2016-12-01 09:12:00	2.024				1.131
715	KAIT	2015-12-01 11:54:00	3.167			716	KAIT	2016-12-01 09:13:00	2.034				1.133
716	KAIT	2015-12-01 11:55:00	3.133			717	KAIT	2016-12-01 09:14:00	2.012				1.121
717	KAIT	2015-12-01 11:56:00	3.13			718	KAIT	2016-12-01 09:15:00	1.994				1.136
718	KAIT	2015-12-01 11:57:00	3.154			719	KAIT	2016-12-01 09:16:00	1.992				1.162
719	KAIT	2015-12-01 11:58:00	3.158			720	KAIT	2016-12-01 09:17:00	1.996				1.162
720	KAIT	2015-12-01 11:59:00	3.131			721	KAIT	2016-12-01 09:18:00	1.99				1.141
721	KAIT	2015-12-01 12:00:00	3.119			722	KAIT	2016-12-01 09:19:00	1.985				1.134
722	KAIT	2015-12-01 12:01:00	3.14			723	KAIT	2016-12-01 09:20:00	1.966				1.174
723	KAIT	2015-12-01 12:02:00	3.117			724	KAIT	2016-12-01 09:21:00	1.959				1.158
724	KAIT	2015-12-01 12:03:00	3.116			725	KAIT	2016-12-01 09:22:00	1.963				1.153
725	KAIT	2015-12-01 12:04:00	3.11			726	KAIT	2016-12-01 09:23:00	1.959				1.151
726	KAIT	2015-12-01 12:05:00	3.111			727	KAIT	2016-12-01 09:24:00	1.942				1.169
727	KAIT	2015-12-01 12:06:00	3.074			728	KAIT	2016-12-01 09:25:00	1.943				1.131
728	KAIT	2015-12-01 12:07:00	3.093			729	KAIT	2016-12-01 09:26:00	1.94				1.153
729	KAIT	2015-12-01 12:08:00	3.089			730	KAIT	2016-12-01 09:27:00	1.925				1.164
730	KAIT	2015-12-01 12:09:00	3.082			731	KAIT	2016-12-01 09:28:00	1.932				1.15
731	KAIT	2015-12-01 12:10:00	3.05			732	KAIT	2016-12-01 09:29:00	1.917				1.133
732	KAIT	2015-12-01 12:11:00	3.053			733	KAIT	2016-12-01 09:30:00	1.927				1.126
733	KAIT	2015-12-01 12:12:00	3.066			734	KAIT	2016-12-01 09:31:00	1.919				1.147
734	KAIT	2015-12-01 12:13:00	3.041			735	KAIT	2016-12-01 09:32:00	1.897				1.144
735	KAIT	2015-12-01 12:14:00	3.026			736	KAIT	2016-12-01 09:33:00	1.929				1.097
736	KAIT	2015-12-01 12:15:00	3.005			737	KAIT	2016-12-01 09:34:00	1.899				1.106
737	KAIT	2015-12-01 12:16:00	3.021			738	KAIT	2016-12-01 09:35:00	1.905				1.116
738	KAIT	2015-12-01 12:17:00	3.02			739	KAIT	2016-12-01 09:36:00	1.917				1.103
739	KAIT	2015-12-01 12:18:00	2.999			740	KAIT	2016-12-01 09:37:00	1.903				1.096
740	KAIT	2015-12-01 12:19:00	3.003			741	KAIT	2016-12-01 09:38:00	1.898				1.105
741	KAIT	2015-12-01 12:20:00	2.989			742	KAIT	2016-12-01 09:39:00	1.904				1.085
742	KAIT	2015-12-01 12:21:00	2.989			743	KAIT	2016-12-01 09:40:00	1.909				1.08
743	KAIT	2015-12-01 12:22:00	2.993			744	KAIT	2016-12-01 09:41:00	1.913				1.08
744	KAIT	2015-12-01 12:23:00	2.99			745	KAIT	2016-12-01 09:42:00	1.897				1.093
745	KAIT	2015-12-01 12:24:00	2.966			746	KAIT	2016-12-01 09:43:00	1.9				1.066
746	KAIT	2015-12-01 12:25:00	2.996			747	KAIT	2016-12-01 09:44:00	1.888				1.108
747	KAIT	2015-12-01 12:26:00	2.971			748	KAIT	2016-12-01 09:45:00	1.881				1.09
748	KAIT	2015-12-01 12:27:00	2.966			749	KAIT	2016-12-01 09:46:00	1.885				1.081
749	KAIT	2015-12-01 12:28:00	2.986			750	KAIT	2016-12-01 09:47:00	1.883				1.103
750	KAIT	2015-12-01 12:29:00	2.944			751	KAIT	2016-12-01 09:48:00	1.875				1.069
751	KAIT	2015-12-01 12:30:00	2.933			752	KAIT	2016-12-01 09:49:00	1.865				1.068
752	KAIT	2015-12-01 12:31:00	2.953			753	KAIT	2016-12-01 09:50:00	1.873				1.08
753	KAIT	2015-12-01 12:32:00	2.929			754	KAIT	2016-12-01 09:51:00	1.854				1.075
754	KAIT	2015-12-01 12:33:00	2.912			755	KAIT	2016-12-01 09:52:00	1.858				1.054
755	KAIT	2015-12-01 12:34:00	2.933			756	KAIT	2016-12-01 09:53:00	1.844				1.089
756	KAIT	2015-12-01 12:35:00	2.933			757	KAIT	2016-12-01 09:54:00	1.842				1.091
757	KAIT	2015-12-01 12:36:00	2.91			758	KAIT	2016-12-01 09:55:00	1.829				1.081
758	KAIT	2015-12-01 12:37:00	2.923			759	KAIT	2016-12-01 09:56:00	1.83				1.093
759	KAIT	2015-12-01 12:38:00	2.884			760	KAIT	2016-12-01 09:57:00	1.805				1.079
760	KAIT	2015-12-01 12:39:00	2.888			761	KAIT	2016-12-01 09:58:00	1.812				1.076
761	KAIT	2015-12-01 12:40:00	2.888			762	KAIT	2016-12-01 09:59:00	1.816				1.072
762	KAIT	2015-12-01 12:41:00	2.887			763	KAIT	2016-12-01 10:00:00	1.807				1.08
763	KAIT	2015-12-01 12:42:00	2.889			764	KAIT	2016-12-01 10:01:00	1.799				1.09
764	KAIT	2015-12-01 12:43:00	2.879			765	KAIT	2016-12-01 10:02:00	1.787				1.092
765	KAIT	2015-12-01 12:44:00	2.874			766	KAIT	2016-12-01 10:03:00	1.779				1.095
766	KAIT	2015-12-01 12:45:00	2.847			767	KAIT	2016-12-01 10:04:00	1.767				1.08
767	KAIT	2015-12-01 12:46:00	2.844			768	KAIT	2016-12-01 10:05:00	1.784				1.06
768	KAIT	2015-12-01 12:47:00	2.838			769	KAIT	2016-12-01 10:06:00	1.777				1.061
769	KAIT	2015-12-01 12:48:00	2.845			770	KAIT	2016-12-01 10:07:00	1.759				1.086
770	KAIT	2015-12-01 12:49:00	2.813			771	KAIT	2016-12-01 10:08:00	1.77				1.043
771	KAIT	2015-12-01 12:50:00	2.825			772	KAIT	2016-12-01 10:09:00	1.758				1.067
772	KAIT	2015-12-01 12:51:00	2.822			773	KAIT	2016-12-01 10:10:00	1.768				1.054
773	KAIT	2015-12-01 12:52:00	2.828			774	KAIT	2016-12-01 10:11:00	1.753				1.075
774	KAIT	2015-12-01 12:53:00	2.804			775	KAIT	2016-12-01 10:12:00	1.75				1.054
775	KAIT	2015-12-01 12:54:00	2.805			776	KAIT	2016-12-01 10:13:00	1.756				1.049
776	KAIT	2015-12-01 12:55:00	2.794			777	KAIT	2016-12-01 10:14:00	1.743				1.051
777	KAIT	2015-12-01 12:56:00	2.805			778	KAIT	2016-12-01 10:15:00	1.741				1.064
778	KAIT	2015-12-01 12:57:00	2.774			779	KAIT	2016-12-01 10:16:00	1.745				1.029
779	KAIT	2015-12-01 12:58:00	2.8			780	KAIT	2016-12-01 10:17:00	1.748				1.052
780	KAIT	2015-12-01 12:59:00	2.797			781	KAIT	2016-12-01 10:18:00	1.732				1.065
781	KAIT	2015-12-01 13:00:00	2.779			782	KAIT	2016-12-01 10:19:00	1.769				1.01
782	KAIT	2015-12-01 13:01:00	2.753			783	KAIT	2016-12-01 10:20:00	1.749				1.004
783	KAIT	2015-12-01 13:02:00	2.757			784	KAIT	2016-12-01 10:21:00	1.739				1.018
784	KAIT	2015-12-01 13:03:00	2.768			785	KAIT	2016-12-01 10:22:00	1.753				1.015
785	KAIT	2015-12-01 13:04:00	2.745			786	KAIT	2016-12-01 10:23:00	1.742				1.003
786	KAIT	2015-12-01 13:05:00	2.741			787	KAIT	2016-12-01 10:24:00	1.734				1.007
787	KAIT	2015-12-01 13:06:00	2.741			788	KAIT	2016-12-01 10:25:00	1.713				1.028
788	KAIT	2015-12-01 13:07:00	2.73			789	KAIT	2016-12-01 10:26:00	1.692				1.038
789	KAIT	2015-12-01 13:08:00	2.686			790	KAIT	2016-12-01 10:27:00	1.704				0.982
790	KAIT	2015-12-01 13:09:00	2.684			791	KAIT	2016-12-01 10:28:00	1.699				0.985
791	KAIT	2015-12-01 13:10:00	2.712			792	KAIT	2016-12-01 10:29:00	1.7				1.012
792	KAIT	2015-12-01 13:11:00	2.703			793	KAIT	2016-12-01 10:30:00	1.69				1.013
793	KAIT	2015-12-01 13:12:00	2.676			794	KAIT	2016-12-01 10:31:00	1.674				1.002
794	KAIT	2015-12-01 13:13:00	2.721			795	KAIT	2016-12-01 10:32:00	1.675				1.046
795	KAIT	2015-12-01 13:14:00	2.7			796	KAIT	2016-12-01 10:33:00	1.693				1.007
796	KAIT	2015-12-01 13:15:00	2.683			797	KAIT	2016-12-01 10:34:00	1.662				1.021
797	KAIT	2015-12-01 13:16:00	2.661			798	KAIT	2016-12-01 10:35:00	1.652				1.009
798	KAIT	2015-12-01 13:17:00	2.667			799	KAIT	2016-12-01 10:36:00	1.663				1.004
799	KAIT	2015-12-01 13:18:00	2.652			800	KAIT	2016-12-01 10:37:00	1.66				0.992
800	KAIT	2015-12-01 13:19:00	2.654			801	KAIT	2016-12-01 10:38:00	1.65				1.004
801	KAIT	2015-12-01 13:20:00	2.655			802	KAIT	2016-12-01 10:39:00	1.648				1.007
802	KAIT	2015-12-01 13:21:00	2.636			803	KAIT	2016-12-01 10:40:00	1.644				0.992
803	KAIT	2015-12-01 13:22:00	2.64			804	KAIT	2016-12-01 10:41:00	1.632				1.008
804	KAIT	2015-12-01 13:23:00	2.593			805	KAIT	2016-12-01 10:42:00	1.645				0.948
805	KAIT	2015-12-01 13:24:00	2.631			806	KAIT	2016-12-01 10:43:00	1.639				0.992
806	KAIT	2015-12-01 13:25:00	2.622			807	KAIT	2016-12-01 10:44:00	1.612				1.01
807	KAIT	2015-12-01 13:26:00	2.623			808	KAIT	2016-12-01 10:45:00	1.623				1
808	KAIT	2015-12-01 13:27:00	2.605			809	KAIT	2016-12-01 10:46:00	1.629				0.976
809	KAIT	2015-12-01 13:28:00	2.59			810	KAIT	2016-12-01 10:47:00	1.62				0.97
810	KAIT	2015-12-01 13:29:00	2.611			811	KAIT	2016-12-01 10:48:00	1.616				0.995
811	KAIT	2015-12-01 13:30:00	2.617			812	KAIT	2016-12-01 10:49:00	1.617				1
812	KAIT	2015-12-01 13:31:00	2.584			813	KAIT	2016-12-01 10:50:00	1.639				0.945
813	KAIT	2015-12-01 13:32:00	2.597			814	KAIT	2016-12-01 10:51:00	1.626				0.971
814	KAIT	2015-12-01 13:33:00	2.587			815	KAIT	2016-12-01 10:52:00	1.627				0.96
815	KAIT	2015-12-01 13:34:00	2.583			816	KAIT	2016-12-01 10:53:00	1.605				0.978
816	KAIT	2015-12-01 13:35:00	2.575			817	KAIT	2016-12-01 10:54:00	1.606				0.969
817	KAIT	2015-12-01 13:36:00	2.566			818	KAIT	2016-12-01 10:55:00	1.596				0.97
818	KAIT	2015-12-01 13:37:00	2.573			819	KAIT	2016-12-01 10:56:00	1.598				0.975
819	KAIT	2015-12-01 13:38:00	2.554			820	KAIT	2016-12-01 10:57:00	1.602				0.952
820	KAIT	2015-12-01 13:39:00	2.558			821	KAIT	2016-12-01 10:58:00	1.586				0.972
821	KAIT	2015-12-01 13:40:00	2.566			822	KAIT	2016-12-01 10:59:00	1.592				0.974
822	KAIT	2015-12-01 13:41:00	2.518			823	KAIT	2016-12-01 11:00:00	1.586				0.932
823	KAIT	2015-12-01 13:42:00	2.542			824	KAIT	2016-12-01 11:01:00	1.584				0.958
824	KAIT	2015-12-01 13:43:00	2.511			825	KAIT	2016-12-01 11:02:00	1.578				0.933
825	KAIT	2015-12-01 13:44:00	2.517			826	KAIT	2016-12-01 11:03:00	1.58				0.937
826	KAIT	2015-12-01 13:45:00	2.518			827	KAIT	2016-12-01 11:04:00	1.574				0.944
827	KAIT	2015-12-01 13:46:00	2.516			828	KAIT	2016-12-01 11:05:00	1.565				0.951
828	KAIT	2015-12-01 13:47:00	2.523			829	KAIT	2016-12-01 11:06:00	1.593				0.93
829	KAIT	2015-12-01 13:48:00	2.529			830	KAIT	2016-12-01 11:07:00	1.574				0.955
830	KAIT	2015-12-01 13:49:00	2.509			831	KAIT	2016-12-01 11:08:00	1.569				0.94
831	KAIT	2015-12-01 13:50:00	2.487			832	KAIT	2016-12-01 11:09:00	1.575				0.912
832	KAIT	2015-12-01 13:51:00	2.506			833	KAIT	2016-12-01 11:10:00	1.568				0.938
833	KAIT	2015-12-01 13:52:00	2.459			834	KAIT	2016-12-01 11:11:00	1.577				0.882
834	KAIT	2015-12-01 13:53:00	2.492			835	KAIT	2016-12-01 11:12:00	1.568				0.924
835	KAIT	2015-12-01 13:54:00	2.466			836	KAIT	2016-12-01 11:13:00	1.567				0.899
836	KAIT	2015-12-01 13:55:00	2.472			837	KAIT	2016-12-01 11:14:00	1.559				0.913
837	KAIT	2015-12-01 13:56:00	2.467			838	KAIT	2016-12-01 11:15:00	1.561				0.906
838	KAIT	2015-12-01 13:57:00	2.474			839	KAIT	2016-12-01 11:16:00	1.55				0.924
839	KAIT	2015-12-01 13:58:00	2.466			840	KAIT	2016-12-01 11:17:00	1.553				0.913
840	KAIT	2015-12-01 13:59:00	2.474			841	KAIT	2016-12-01 11:18:00	1.55				0.924
841	KAIT	2015-12-01 14:00:00	2.467			842	KAIT	2016-12-01 11:19:00	1.553				0.914
842	KAIT	2015-12-01 14:01:00	2.449			843	KAIT	2016-12-01 11:20:00	1.529				0.92
843	KAIT	2015-12-01 14:02:00	2.434			844	KAIT	2016-12-01 11:21:00	1.525				0.909
844	KAIT	2015-12-01 14:03:00	2.445			845	KAIT	2016-12-01 11:22:00	1.537				0.908
845	KAIT	2015-12-01 14:04:00	2.461			846	KAIT	2016-12-01 11:23:00	1.529				0.932
846	KAIT	2015-12-01 14:05:00	2.408			847	KAIT	2016-12-01 11:24:00	1.504				0.904
847	KAIT	2015-12-01 14:06:00	2.432			848	KAIT	2016-12-01 11:25:00	1.522				0.91
848	KAIT	2015-12-01 14:07:00	2.379			849	KAIT	2016-12-01 11:26:00	1.508				0.871
849	KAIT	2015-12-01 14:08:00	2.403			850	KAIT	2016-12-01 11:27:00	1.514				0.889
850	KAIT	2015-12-01 14:09:00	2.407			851	KAIT	2016-12-01 11:28:00	1.496				0.911
851	KAIT	2015-12-01 14:10:00	2.404			852	KAIT	2016-12-01 11:29:00	1.519				0.885
852	KAIT	2015-12-01 14:11:00	2.406			853	KAIT	2016-12-01 11:30:00	1.526				0.88
853	KAIT	2015-12-01 14:12:00	2.4			854	KAIT	2016-12-01 11:31:00	1.516				0.884
854	KAIT	2015-12-01 14:13:00	2.422			855	KAIT	2016-12-01 11:32:00	1.511				0.911
855	KAIT	2015-12-01 14:14:00	2.392			856	KAIT	2016-12-01 11:33:00	1.528				0.864
856	KAIT	2015-12-01 14:15:00	2.397			857	KAIT	2016-12-01 11:34:00	1.531				0.866
857	KAIT	2015-12-01 14:16:00	2.377			858	KAIT	2016-12-01 11:35:00	1.519				0.858
858	KAIT	2015-12-01 14:17:00	2.379			859	KAIT	2016-12-01 11:36:00	1.508				0.871
859	KAIT	2015-12-01 14:18:00	2.38			860	KAIT	2016-12-01 11:37:00	1.519				0.861
860	KAIT	2015-12-01 14:19:00	2.384			861	KAIT	2016-12-01 11:38:00	1.513				0.871
861	KAIT	2015-12-01 14:20:00	2.385			862	KAIT	2016-12-01 11:39:00	1.517				0.868
862	KAIT	2015-12-01 14:21:00	2.363			863	KAIT	2016-12-01 11:40:00	1.516				0.847
863	KAIT	2015-12-01 14:22:00	2.382			864	KAIT	2016-12-01 11:41:00	1.523				0.859
864	KAIT	2015-12-01 14:23:00	2.374			865	KAIT	2016-12-01 11:42:00	1.522				0.852
865	KAIT	2015-12-01 14:24:00	2.369			866	KAIT	2016-12-01 11:43:00	1.506				0.863
866	KAIT	2015-12-01 14:25:00	2.375			867	KAIT	2016-12-01 11:44:00	1.495				0.88
867	KAIT	2015-12-01 14:26:00	2.357			868	KAIT	2016-12-01 11:45:00	1.514				0.843
868	KAIT	2015-12-01 14:27:00	2.36			869	KAIT	2016-12-01 11:46:00	1.524				0.836
869	KAIT	2015-12-01 14:28:00	2.367			870	KAIT	2016-12-01 11:47:00	1.488				0.879
870	KAIT	2015-12-01 14:29:00	2.362			871	KAIT	2016-12-01 11:48:00	1.48				0.882
871	KAIT	2015-12-01 14:30:00	2.36			872	KAIT	2016-12-01 11:49:00	1.497				0.863
872	KAIT	2015-12-01 14:31:00	2.347			873	KAIT	2016-12-01 11:50:00	1.491				0.856
873	KAIT	2015-12-01 14:32:00	2.343			874	KAIT	2016-12-01 11:51:00	1.494				0.849
874	KAIT	2015-12-01 14:33:00	2.331			875	KAIT	2016-12-01 11:52:00	1.492				0.839
875	KAIT	2015-12-01 14:34:00	2.33			876	KAIT	2016-12-01 11:53:00	1.477				0.853
876	KAIT	2015-12-01 14:35:00	2.345			877	KAIT	2016-12-01 11:54:00	1.466				0.879
877	KAIT	2015-12-01 14:36:00	2.316			878	KAIT	2016-12-01 11:55:00	1.474				0.842
878	KAIT	2015-12-01 14:37:00	2.3			879	KAIT	2016-12-01 11:56:00	1.459				0.841
879	KAIT	2015-12-01 14:38:00	2.307			880	KAIT	2016-12-01 11:57:00	1.46				0.847
880	KAIT	2015-12-01 14:39:00	2.305			881	KAIT	2016-12-01 11:58:00	1.473				0.832
881	KAIT	2015-12-01 14:40:00	2.326			882	KAIT	2016-12-01 11:59:00	1.454				0.872
882	KAIT	2015-12-01 14:41:00	2.297			883	KAIT	2016-12-01 12:00:00	1.458				0.839
883	KAIT	2015-12-01 14:42:00	2.318			884	KAIT	2016-12-01 12:01:00	1.481				0.837
884	KAIT	2015-12-01 14:43:00	2.305			885	KAIT	2016-12-01 12:02:00	1.482				0.823
885	KAIT	2015-12-01 14:44:00	2.307			886	KAIT	2016-12-01 12:03:00	1.484				0.823
886	KAIT	2015-12-01 14:45:00	2.312			887	KAIT	2016-12-01 12:04:00	1.49				0.822
887	KAIT	2015-12-01 14:46:00	2.285			888	KAIT	2016-12-01 12:05:00	1.482				0.803
888	KAIT	2015-12-01 14:47:00	2.329			889	KAIT	2016-12-01 12:06:00	1.49				0.839
889	KAIT	2015-12-01 14:48:00	2.333			890	KAIT	2016-12-01 12:07:00	1.488				0.845
890	KAIT	2015-12-01 14:49:00	2.316			891	KAIT	2016-12-01 12:08:00	1.487				0.829
891	KAIT	2015-12-01 14:50:00	2.317			892	KAIT	2016-12-01 12:09:00	1.488				0.829
892	KAIT	2015-12-01 14:51:00	2.336			893	KAIT	2016-12-01 12:10:00	1.49				0.846
893	KAIT	2015-12-01 14:52:00	2.272			894	KAIT	2016-12-01 12:11:00	1.477				0.795
894	KAIT	2015-12-01 14:53:00	2.328			895	KAIT	2016-12-01 12:12:00	1.472				0.856
895	KAIT	2015-12-01 14:54:00	2.297			896	KAIT	2016-12-01 12:13:00	1.48				0.817
896	KAIT	2015-12-01 14:55:00	2.311			897	KAIT	2016-12-01 12:14:00	1.486				0.825
897	KAIT	2015-12-01 14:56:00	2.298			898	KAIT	2016-12-01 12:15:00	1.465				0.833
898	KAIT	2015-12-01 14:57:00	2.292			899	KAIT	2016-12-01 12:16:00	1.489				0.803
899	KAIT	2015-12-01 14:58:00	2.314			900	KAIT	2016-12-01 12:17:00	1.487				0.827
900	KAIT	2015-12-01 14:59:00	2.237			901	KAIT	2016-12-01 12:18:00	1.483				0.754
[truncated: 87,582 more rows]

## Sheet: Method E
Tide Gauge	UTC date/time	Elevation_m	NZ_Date	NZ_Time	High/low tide	Elev		Ave elev for 44 days before EQ	Ave elev for 44 days after EQ	Diff	Ave all pre-EQ	Ave all post-EQ	Diff
[truncated: 190,024 more rows]

[truncated: 1 more sheets: LINZ_readme]
