# Supplementary material for: Using a calibrated upper living position of marine biota to calculate coseismic uplift: a case study of the 2016 Kaikōura earthquake, New Zealand
Source: Copernicus journal article supplement (doi:10.5194/esurf-8-351-2020), 2020-05-08
Supplement: Supplementary file 1 [file esurf-8-351-2020-supplement.zip › Supplementary File S3.xlsx]

## Sheet: Omihi Point
Pre-EQ		Post-EQ
X	Graphic Profile 1	X	Graphic Profile 1	Difference
0	3.7976	0	5.4121	1.6145
0.97731	3.7239	0.970279	5.3818	1.6579		Mean	SD	max	min	median
1.95462	3.6713	1.94056	5.3816	1.7103		1.64435	0.0442805	1.7435	1.5265	1.6429
2.93193	3.6561	2.91084	5.3669	1.7108
3.90924	3.7147	3.88111	5.3494	1.6347
4.88655	3.6727	4.85139	5.3629	1.6902
5.86386	3.6687	5.82167	5.3733	1.7046
6.84117	3.7414	6.79195	5.3845	1.6431
7.81848	3.727	7.76223	5.3569	1.6299
8.79579	3.6733	8.73251	5.3631	1.6898
9.7731	3.7016	9.70279	5.3434	1.6418
10.7504	3.7079	10.6731	5.3555	1.6476
11.7277	3.6722	11.6433	5.3651	1.6929
12.705	3.6822	12.6136	5.3622	1.68
13.6823	3.6855	13.5839	5.3517	1.6662
14.6596	3.6636	14.5542	5.3681	1.7045
15.637	3.6943	15.5245	5.3366	1.6423
16.6143	3.7442	16.4947	5.3379	1.5937
17.5916	3.7443	17.465	5.3561	1.6118
18.5689	3.734	18.4353	5.3546	1.6206
19.5462	3.7644	19.4056	5.3494	1.585
20.5235	3.6744	20.3759	5.3633	1.6889
21.5008	3.6512	21.3461	5.3663	1.7151
22.4781	3.6751	22.3164	5.3348	1.6597
23.4554	3.6964	23.2867	5.3599	1.6635
24.4327	3.7158	24.257	5.3774	1.6616
25.4101	3.6964	25.2272	5.37	1.6736
26.3874	3.7073	26.1975	5.3825	1.6752
27.3647	3.6984	27.1678	5.364	1.6656
28.342	3.6288	28.1381	5.3506	1.7218
29.3193	3.6248	29.1084	5.3587	1.7339
30.2966	3.6769	30.0786	5.382	1.7051
31.2739	3.743	31.0489	5.366	1.623
32.2512	3.7661	32.0192	5.361	1.5949
33.2285	3.7622	32.974	5.3778	1.6156
34.2118	3.7599	33.9288	5.402	1.6421
35.1951	3.7364	34.8836	5.3812	1.6448
36.1783	3.6822	35.8383	5.3727	1.6905
37.1616	3.685	36.7931	5.4007	1.7157
38.1449	3.6991	37.7479	5.384	1.6849
39.1281	3.72	38.7027	5.3868	1.6668
40.1114	3.7526	39.6575	5.3872	1.6346
41.0947	3.7476	40.6123	5.3741	1.6265
42.0779	3.727	41.5671	5.3648	1.6378
43.0612	3.7564	42.5218	5.378	1.6216
44.0445	3.748	43.4766	5.4168	1.6688
45.0277	3.7037	44.4314	5.3916	1.6879
46.011	3.7042	45.3862	5.3681	1.6639
46.9943	3.7485	46.341	5.3688	1.6203
47.9776	3.7411	47.2958	5.3864	1.6453
48.9608	3.7098	48.2506	5.385	1.6752
49.9441	3.7096	49.2053	5.3604	1.6508
50.9274	3.7095	50.184	5.3917	1.6822
51.9106	3.6987	51.1626	5.398	1.6993
52.8939	3.7219	52.1412	5.3977	1.6758
53.8772	3.7357	53.1199	5.3984	1.6627
54.8604	3.7769	54.0985	5.4177	1.6408
55.8437	3.8144	55.0771	5.4222	1.6078
56.827	3.7935	56.0558	5.4259	1.6324
57.8102	3.7255	57.0344	5.4308	1.7053
58.792	3.7062	58.013	5.41	1.7038
59.7738	3.7383	58.9917	5.4102	1.6719
60.7556	3.7102	59.9703	5.4223	1.7121
61.7374	3.6736	60.9489	5.397	1.7234
62.7192	3.7	61.9276	5.4319	1.7319
63.701	3.7218	62.9062	5.4398	1.718
64.6828	3.7298	63.8849	5.4192	1.6894
65.6646	3.7843	64.8635	5.4225	1.6382
66.6463	3.8547	65.8421	5.4184	1.5637
67.6281	3.8787	66.8208	5.4303	1.5516
68.6099	3.8689	67.7994	5.4345	1.5656
69.5917	3.8335	68.778	5.4127	1.5792
70.5735	3.8007	69.7567	5.4223	1.6216
71.5553	3.8112	70.7353	5.4333	1.6221
72.5371	3.7937	71.7139	5.4857	1.692
73.5189	3.8003	72.6926	5.487	1.6867
74.5007	3.7738	73.6712	5.4877	1.7139
75.4825	3.7652	74.6498	5.4801	1.7149
76.4642	3.8282	75.6285	5.4887	1.6605
77.446	3.9041	76.6071	5.5024	1.5983
78.4278	3.9042	77.5857	5.5087	1.6045
79.4096	3.926	78.5644	5.5369	1.6109
80.3775	3.919	79.543	5.5055	1.5865
81.3455	3.8389	80.5216	5.5285	1.6896
82.3134	3.8836	81.5003	5.5257	1.6421
83.2813	3.9144	82.4789	5.5675	1.6531
84.2493	3.9006	83.4575	5.5556	1.655
85.2172	3.9062	84.4393	5.5429	1.6367
86.1851	3.939	85.421	5.5758	1.6368
87.1531	3.9716	86.4027	5.5681	1.5965
88.121	3.9455	87.3845	5.5882	1.6427
89.0889	3.9174	88.3662	5.5958	1.6784
90.0569	3.9572	89.3479	5.6436	1.6864
91.0248	4.0403	90.3297	5.6129	1.5726
91.9927	4.0521	91.3114	5.6476	1.5955
92.9607	4.0772	92.2931	5.6609	1.5837
93.9286	4.0751	93.2749	5.6792	1.6041
94.8965	4.0534	94.2566	5.6863	1.6329
95.8645	4.0953	95.2383	5.6826	1.5873
96.8324	4.0646	96.2201	5.6615	1.5969
97.8003	4.0474	97.2018	5.6534	1.606
98.7683	4.057	98.1835	5.6928	1.6358
99.7362	4.0857	99.1653	5.6947	1.609
100.704	4.0654	100.147	5.7313	1.6659
101.672	4.049	101.129	5.7321	1.6831
102.66	4.0959	102.11	5.7626	1.6667
103.647	4.1432	103.092	5.7659	1.6227
104.635	4.154	104.074	5.749	1.595
105.623	4.1371	105.056	5.7473	1.6102
106.61	4.1404	106.037	5.7811	1.6407
107.598	4.1426	107.019	5.8108	1.6682
108.585	4.1346	108.001	5.7791	1.6445
109.573	4.1801	108.983	5.7614	1.5813
110.561	4.1984	109.964	5.7956	1.5972
111.548	4.1849	110.946	5.8132	1.6283
112.536	4.1774	111.928	5.7704	1.593
113.523	4.1759	112.91	5.8046	1.6287
114.511	4.1445	113.891	5.8145	1.67
115.499	4.1364	114.878	5.8119	1.6755
116.486	4.162	115.864	5.8219	1.6599
117.474	4.1342	116.851	5.8331	1.6989
118.462	4.1465	117.837	5.8308	1.6843
119.449	4.2072	118.824	5.8378	1.6306
120.437	4.2413	119.81	5.8513	1.61
121.424	4.2015	120.796	5.8957	1.6942
122.412	4.2121	121.783	5.8671	1.655
123.4	4.1733	122.769	5.8623	1.689
124.387	4.134	123.756	5.8775	1.7435
125.375	4.1924	124.742	5.8771	1.6847
126.363	4.2203	125.729	5.8923	1.672
127.35	4.2501	126.715	5.9038	1.6537
128.338	4.2662	127.702	5.9065	1.6403
129.325	4.2153	128.688	5.8618	1.6465
130.313	4.2276	129.675	5.9054	1.6778
131.301	4.2563	130.661	5.8905	1.6342
132.288	4.2488	131.648	5.9273	1.6785
133.276	4.2342	132.634	5.9268	1.6926
134.263	4.265	133.62	5.9163	1.6513
135.251	4.3062	134.607	5.9294	1.6232
136.239	4.3436	135.593	5.9511	1.6075
137.226	4.3044	136.58	5.9829	1.6785
138.214	4.2532	137.566	5.9794	1.7262
139.182	4.3326	138.553	5.9902	1.6576
140.149	4.3783	139.527	5.9888	1.6105
141.117	4.3334	140.501	5.9967	1.6633
142.084	4.2928	141.475	6.0244	1.7316
143.052	4.3177	142.448	6.0301	1.7124
144.019	4.3542	143.422	6.0138	1.6596
144.987	4.3796	144.396	6.0267	1.6471
145.955	4.3694	145.37	6.0349	1.6655
146.922	4.3914	146.344	6.0518	1.6604
147.89	4.4364	147.318	6.0798	1.6434
148.857	4.5125	148.292	6.0854	1.5729
149.825	4.5162	149.266	6.1304	1.6142
150.793	4.5056	150.24	6.1064	1.6008
151.76	4.5227	151.214	6.16	1.6373
152.728	4.5588	152.187	6.192	1.6332
153.695	4.5437	153.161	6.1882	1.6445
154.663	4.4891	154.135	6.1973	1.7082
155.63	4.5036	155.109	6.2334	1.7298
156.598	4.5588	156.083	6.2406	1.6818
157.566	4.5565	157.057	6.2435	1.687
158.533	4.5581	158.031	6.263	1.7049
159.501	4.6222	159.005	6.2678	1.6456
160.468	4.6704	159.979	6.2493	1.5789
161.436	4.7134	160.953	6.3178	1.6044
162.404	4.7186	161.927	6.3198	1.6012
163.371	4.6856	162.9	6.3266	1.641
164.339	4.6876	163.874	6.3057	1.6181
165.306	4.7087	164.848	6.2948	1.5861
166.29	4.6499	165.822	6.3324	1.6825
167.273	4.6664	166.796	6.345	1.6786
168.256	4.6898	167.788	6.3182	1.6284
169.24	4.757	168.781	6.3008	1.5438
170.223	4.8099	169.773	6.3446	1.5347
171.207	4.8124	170.765	6.3389	1.5265
172.19	4.8174	171.757	6.3894	1.572
173.173	4.7951	172.749	6.4002	1.6051
174.157	4.7818	173.742	6.4038	1.622
175.14	4.7723	174.734	6.4032	1.6309
176.123	4.7829	175.726	6.3932	1.6103
177.107	4.8045	176.718	6.4057	1.6012
178.09	4.7778	177.711	6.4302	1.6524
179.073	4.787	178.703	6.4411	1.6541
180.057	4.7947	179.695	6.4481	1.6534
181.04	4.8276	180.687	6.4527	1.6251
182.024	4.8607	181.679	6.4515	1.5908
183.007	4.8964	182.672	6.5169	1.6205
183.99	4.9452	183.664	6.4913	1.5461
184.974	4.9232	184.656	6.4676	1.5444
185.957	4.8969	185.648	6.5129	1.616
186.94	4.8861	186.641	6.5139	1.6278
187.924	4.8708	187.592	6.5338	1.663
188.907	4.9088	188.543	6.5283	1.6195
189.89	4.9268	189.494	6.56	1.6332
190.874	4.9395	190.445	6.5984	1.6589
191.857	4.9432	191.397	6.5653	1.6221
192.841	4.9607	192.348	6.6026	1.6419
193.824	5.0088	193.299	6.6047	1.5959
194.807	5.0514	194.25	6.6001	1.5487
195.791	5.0297	195.201	6.6196	1.5899
196.774	5.0078	196.153	6.638	1.6302
197.757	5.0473	197.104	6.656	1.6087
198.741	5.0441	198.055	6.6502	1.6061
199.724	5.0124	199.006	6.662	1.6496
200.707	5.09	199.958	6.68	1.59
201.691	5.082	200.909	6.7147	1.6327
202.674	5.0541	201.86	6.7111	1.657
203.658	5.0657	202.811	6.6943	1.6286
204.641	5.1382	203.762	6.7086	1.5704

## Sheet: Paia Point
Distance_N_Oaro	DEM_Kaikoura_2012_1m_NZVD2016	DEM_NZTA	Uplift	Easting	Northing	Average	1.05414
5609	3.98761	5.11	1.12239	1644019	5297628	Median	1.05097
5610	3.96943	5.11	1.14057	1644020	5297629	SD	0.0725167
5611	3.98569	5.16	1.1743	1644020	5297629	Max	1.30662
5612	3.98569	5.16	1.1743	1644021	5297630	Min	0.896888
5613	4.05923	5.14	1.08077	1644021	5297631
5614	4.07853	5.16	1.08147	1644022	5297632
5615	4.00275	5.18	1.17725	1644022	5297633
5616	4.07711	5.07	0.99289	1644023	5297634
5617	4.02643	5.08	1.05357	1644023	5297635
5618	3.95201	5.07	1.11799	1644024	5297635
5619	4.03351	5.13	1.09649	1644024	5297636
5620	4.03351	5.13	1.09649	1644025	5297637
5621	4.09323	5.16	1.06677	1644025	5297638
5622	3.99609	5.07	1.07391	1644026	5297639
5623	4.0921	5.09	0.997896	1644026	5297640
5624	4.1143	5.15	1.0357	1644027	5297641
5625	4.10345	5.11	1.00655	1644027	5297642
5626	3.98621	5.16	1.17379	1644028	5297642
5627	4.10499	5.11	1.00501	1644028	5297643
5628	4.10499	5.11	1.00501	1644029	5297644
5629	4.16718	5.31	1.14282	1644029	5297645
5630	4.11893	5.12	1.00107	1644030	5297646
5631	4.10203	5.21	1.10797	1644030	5297647
5632	4.04599	5.14	1.09401	1644031	5297648
5633	4.05504	5.2	1.14496	1644031	5297648
5634	4.08975	5.09	1.00025	1644032	5297649
5635	4.10444	5.24	1.13556	1644032	5297650
5636	4.07925	5.14	1.06075	1644033	5297651
5637	4.08751	5.15	1.06249	1644033	5297652
5638	4.08379	5.18	1.09621	1644034	5297653
5639	4.02989	5.18	1.15011	1644034	5297654
5640	4.04435	5.15	1.10565	1644035	5297655
5641	4.13854	5.19	1.05146	1644035	5297655
5642	4.13854	5.19	1.05146	1644036	5297656
5643	4.17441	5.22	1.04559	1644036	5297657
5644	4.10502	5.17	1.06498	1644037	5297658
5645	4.05566	5.28	1.22434	1644037	5297659
5646	4.16262	5.27	1.10738	1644038	5297660
5647	4.18057	5.3	1.11943	1644038	5297661
5648	4.16599	5.19	1.02401	1644039	5297662
5649	4.23504	5.24	1.00496	1644039	5297662
5650	4.24114	5.24	0.998861	1644040	5297663
5651	4.24436	5.25	1.00564	1644040	5297664
5652	4.23289	5.28	1.04711	1644041	5297665
5653	4.25141	5.26	1.00859	1644041	5297666
5654	4.19274	5.25	1.05726	1644042	5297667
5655	4.16105	5.26	1.09895	1644042	5297668
5656	4.22627	5.25	1.02373	1644043	5297669
5657	4.1326	5.28	1.14741	1644043	5297669
5658	4.16576	5.27	1.10424	1644043	5297670
5659	4.16576	5.27	1.10424	1644044	5297671
5660	4.20227	5.29	1.08773	1644044	5297672
5661	4.23259	5.26	1.02741	1644045	5297673
5662	4.20842	5.38	1.17158	1644045	5297674
5663	4.1803	5.36	1.1797	1644046	5297675
5664	4.30645	5.35	1.04355	1644046	5297676
5665	4.28993	5.32	1.03007	1644047	5297677
5666	4.41084	5.41	0.999161	1644047	5297677
5667	4.35603	5.35	0.993973	1644048	5297678
5668	4.3198	5.31	0.990198	1644048	5297679
5669	4.41301	5.39	0.976993	1644048	5297680
5670	4.37155	5.38	1.00845	1644049	5297681
5671	4.34145	5.42	1.07855	1644049	5297682
5672	4.33621	5.37	1.03379	1644050	5297683
5673	4.23225	5.39	1.15775	1644050	5297684
5674	4.14338	5.45	1.30662	1644050	5297685
5675	4.35262	5.49	1.13738	1644051	5297686
5676	4.52721	5.55	1.02279	1644051	5297687
5677	4.54345	5.47	0.926547	1644052	5297687
5678	4.49536	5.43	0.934637	1644052	5297688
5679	4.41357	5.42	1.00643	1644053	5297689
5680	4.41357	5.42	1.00643	1644053	5297690
5681	4.55727	5.54	0.982732	1644053	5297691
5682	4.51022	5.45	0.939776	1644054	5297692
5683	4.48486	5.49	1.00514	1644054	5297693
5684	4.45132	5.39	0.93868	1644055	5297694
5685	4.44402	5.47	1.02598	1644055	5297695
5686	4.50842	5.43	0.921576	1644055	5297696
5687	4.44259	5.45	1.00741	1644056	5297697
5688	4.39006	5.51	1.11994	1644056	5297697
5689	4.37659	5.47	1.09342	1644057	5297698
5690	4.37712	5.45	1.07288	1644057	5297699
5691	4.30076	5.43	1.12924	1644057	5297700
5692	4.30076	5.43	1.12924	1644058	5297701
5693	4.34391	5.51	1.16609	1644058	5297702
5694	4.30568	5.49	1.18432	1644058	5297703
5695	4.3764	5.48	1.1036	1644059	5297704
5696	4.43444	5.52	1.08556	1644059	5297705
5697	4.33958	5.46	1.12042	1644060	5297706
5698	4.3514	5.43	1.0786	1644060	5297707
5699	4.49378	5.48	0.986225	1644060	5297708
5700	4.47311	5.37	0.896888	1644061	5297709
5701	4.52289	5.52	0.997113	1644061	5297710
5702	4.50512	5.49	0.984879	1644061	5297710
5703	4.42664	5.42	0.993358	1644062	5297711
5704	4.37894	5.51	1.13106	1644062	5297712
5705	4.40197	5.43	1.02803	1644063	5297713
5706	4.40197	5.43	1.02803	1644063	5297714
5707	4.43643	5.55	1.11357	1644063	5297715
5708	4.40742	5.43	1.02258	1644064	5297716
5709	4.43346	5.51	1.07654	1644064	5297717
5710	4.42604	5.5	1.07396	1644064	5297718
5711	4.44391	5.43	0.986089	1644065	5297719
5712	4.4369	5.47	1.0331	1644065	5297720
5713	4.45548	5.52	1.06452	1644065	5297721
5714	4.35101	5.46	1.10899	1644066	5297722
5715	4.37791	5.39	1.01209	1644066	5297723
5716	4.36719	5.38	1.01281	1644066	5297724
5717	4.3189	5.39	1.0711	1644067	5297725
5718	4.25804	5.41	1.15196	1644067	5297725
5719	4.28335	5.38	1.09665	1644067	5297726
5720	4.31842	5.36	1.04158	1644068	5297727
5721	4.31266	5.42	1.10734	1644068	5297728
5722	4.32791	5.43	1.10209	1644068	5297729
5723	4.35361	5.37	1.01639	1644069	5297730
5724	4.35456	5.32	0.965444	1644069	5297731
5725	4.34966	5.37	1.02034	1644069	5297732
5726	4.29748	5.39	1.09252	1644070	5297733
5727	4.27952	5.33	1.05048	1644070	5297734
5728	4.33425	5.41	1.07575	1644070	5297735
5729	4.28306	5.34	1.05694	1644071	5297736
5730	4.36235	5.33	0.967653	1644071	5297737
5731	4.33145	5.34	1.00856	1644071	5297738
5732	4.27379	5.38	1.10621	1644072	5297739
5733	4.25442	5.31	1.05558	1644072	5297740
5734	4.30229	5.32	1.01771	1644072	5297741
5735	4.28226	5.3	1.01774	1644072	5297742
5736	4.27516	5.26	0.984839	1644073	5297743
5737	4.28686	5.19	0.903144	1644073	5297744
5738	4.27381	5.3	1.02619	1644073	5297744
5739	4.25654	5.17	0.913459	1644073	5297745
5740	4.23008	5.23	0.999919	1644074	5297746
5741	4.14966	5.24	1.09034	1644074	5297747
5742	4.22498	5.27	1.04502	1644074	5297748
5743	4.1803	5.24	1.0597	1644075	5297749
5744	4.22155	5.24	1.01845	1644075	5297750
5745	4.2716	5.26	0.988402	1644075	5297751
5746	4.27756	5.19	0.912443	1644075	5297752
5747	4.27335	5.23	0.956645	1644076	5297753
5748	4.32221	5.22	0.897792	1644076	5297754
5749	4.23506	5.25	1.01494	1644076	5297755
5750	4.16663	5.29	1.12337	1644076	5297756
5751	4.08484	5.28	1.19515	1644077	5297757
5752	4.05156	5.24	1.18844	1644077	5297758
5753	4.24612	5.23	0.983879	1644077	5297759
5754	4.18513	5.14	0.954873	1644077	5297760
5755	4.1901	5.22	1.0299	1644078	5297761
5756	4.2183	5.14	0.921698	1644078	5297762
5757	4.08341	5.19	1.10659	1644078	5297763
5758	4.19521	5.25	1.05479	1644078	5297764
5759	4.18254	5.15	0.967456	1644079	5297765
5760	4.18845	5.22	1.03155	1644079	5297766

## Sheet: Kaikoura Tide Gauge site
FID	Shape	X_coord	Y_coord	DEM_Kaikou	Kaikoura_E	Difference			Points 1 m apart along a profile along the road to the wharf as shown in the following sheet
0	Point	1657600	5303960	3.85256	4.7542	0.90164	Average	0.916748
1	Point	1657600	5303960	3.99436	4.79119	0.79683	Median	0.911885
2	Point	1657600	5303960	4.05061	4.82107	0.77046	SD	0.0558745
3	Point	1657600	5303960	3.97152	4.83868	0.86716	Max	1.13075
4	Point	1657600	5303960	4.03408	4.8539	0.81982	Min	0.77046
5	Point	1657600	5303960	4.04806	4.87042	0.82236
6	Point	1657600	5303960	4.03737	4.87762	0.84025
7	Point	1657610	5303960	4.07089	4.89463	0.82374
8	Point	1657610	5303960	3.96695	4.91819	0.95124
9	Point	1657610	5303960	4.01462	4.91798	0.90336
10	Point	1657610	5303960	4.0462	4.94271	0.89651
11	Point	1657610	5303960	4.01248	4.95	0.93752
12	Point	1657610	5303960	3.99942	4.93807	0.93865
13	Point	1657610	5303960	4.0856	4.94	0.8544
14	Point	1657610	5303960	4.04739	4.93994	0.89255
15	Point	1657610	5303960	3.96849	4.94	0.97151
16	Point	1657610	5303960	3.91767	4.94	1.02233
17	Point	1657620	5303960	3.91767	4.94	1.02233
18	Point	1657620	5303960	3.86527	4.94	1.07473
19	Point	1657620	5303970	3.98375	4.9307	0.94695
20	Point	1657620	5303970	4.03134	4.92761	0.89627
21	Point	1657620	5303970	3.99254	4.93	0.93746
22	Point	1657620	5303970	3.9411	4.90698	0.96588
23	Point	1657620	5303970	3.86897	4.9	1.03103
24	Point	1657620	5303970	3.75925	4.89	1.13075
25	Point	1657620	5303970	3.94598	4.88835	0.94237
26	Point	1657620	5303970	3.93779	4.86944	0.93165
27	Point	1657620	5303970	3.94693	4.8554	0.90847
28	Point	1657630	5303970	3.90576	4.84	0.93424
29	Point	1657630	5303970	3.86688	4.83	0.96312
30	Point	1657630	5303970	3.79048	4.80877	1.01829
31	Point	1657630	5303970	3.85215	4.79329	0.94114
32	Point	1657630	5303970	3.82259	4.77758	0.95499
33	Point	1657630	5303970	3.73348	4.76494	1.03146
34	Point	1657630	5303970	3.77867	4.74	0.96133
35	Point	1657630	5303970	3.76366	4.73	0.96634
36	Point	1657630	5303970	3.74955	4.72	0.97045
37	Point	1657630	5303970	3.74979	4.7	0.95021
38	Point	1657640	5303970	3.73489	4.686	0.95111
39	Point	1657640	5303970	3.70578	4.67	0.96422
40	Point	1657640	5303970	3.7061	4.64767	0.94157
41	Point	1657640	5303970	3.71674	4.63045	0.91371
42	Point	1657640	5303970	3.71674	4.63045	0.91371
43	Point	1657640	5303970	3.66036	4.61564	0.95528
44	Point	1657640	5303970	3.66793	4.60518	0.93725
45	Point	1657640	5303970	3.68046	4.59091	0.91045
46	Point	1657640	5303970	3.73007	4.57821	0.84814
47	Point	1657640	5303970	3.64207	4.57	0.92793
48	Point	1657640	5303970	3.5761	4.55	0.9739
49	Point	1657650	5303970	3.63105	4.52257	0.89152
50	Point	1657650	5303970	3.58732	4.52	0.93268
51	Point	1657650	5303970	3.61079	4.50997	0.89918
52	Point	1657650	5303970	3.51459	4.5	0.98541
53	Point	1657650	5303970	3.53218	4.47416	0.94198
54	Point	1657650	5303970	3.54434	4.47	0.92566
55	Point	1657650	5303980	3.50794	4.4608	0.95286
56	Point	1657650	5303980	3.48484	4.43367	0.94883
57	Point	1657650	5303980	3.54266	4.42492	0.88226
58	Point	1657650	5303980	3.47089	4.42	0.94911
59	Point	1657660	5303980	3.49056	4.40475	0.91419
60	Point	1657660	5303980	3.48308	4.38194	0.89886
61	Point	1657660	5303980	3.46829	4.37	0.90171
62	Point	1657660	5303980	3.50535	4.35067	0.84532
63	Point	1657660	5303980	3.45229	4.34	0.88771
64	Point	1657660	5303980	3.40285	4.31325	0.9104
65	Point	1657660	5303980	3.41731	4.29587	0.87856
66	Point	1657660	5303980	3.40541	4.27951	0.8741
67	Point	1657660	5303980	3.39705	4.26319	0.86614
68	Point	1657660	5303980	3.42138	4.22875	0.80737
69	Point	1657670	5303980	3.35904	4.221	0.86196
70	Point	1657670	5303980	3.31431	4.22209	0.90778
71	Point	1657670	5303980	3.31431	4.22209	0.90778
72	Point	1657670	5303980	3.29359	4.17326	0.87967
73	Point	1657670	5303980	3.27386	4.16149	0.88763
74	Point	1657670	5303980	3.23887	4.14922	0.91035
75	Point	1657670	5303980	3.23604	4.10346	0.86742
76	Point	1657670	5303980	3.21512	4.08832	0.8732
77	Point	1657670	5303980	3.19023	4.08183	0.8916
78	Point	1657670	5303980	3.186	4.08163	0.89563
79	Point	1657670	5303980	3.18567	4.0303	0.84463
80	Point	1657680	5303980	3.18506	4.03153	0.84647
81	Point	1657680	5303980	3.18116	4.01886	0.8377
82	Point	1657680	5303980	3.11771	3.97443	0.85672
83	Point	1657680	5303980	3.0637	3.96179	0.89809
84	Point	1657680	5303980	3.06905	3.95117	0.88212
85	Point	1657680	5303980	3.00701	3.94098	0.93397
86	Point	1657680	5303980	3.0254	3.90293	0.87753
87	Point	1657680	5303980	3.04355	3.89528	0.85173
88	Point	1657680	5303980	3.06365	3.88	0.81635
89	Point	1657680	5303980	3.05479	3.83414	0.77935
90	Point	1657690	5303980	2.96463	3.82794	0.86331
91	Point	1657690	5303990	2.91143	3.82	0.90857
92	Point	1657690	5303990	2.89462	3.80149	0.90687
93	Point	1657690	5303990	2.88189	3.79512	0.91323
94	Point	1657690	5303990	2.93911	3.78	0.84089
95	Point	1657690	5303990	2.83208	3.74966	0.91758
96	Point	1657690	5303990	2.81318	3.73574	0.92256
97	Point	1657690	5303990	2.79028	3.6995	0.90922
98	Point	1657690	5303990	2.75739	3.69	0.93261
99	Point	1657690	5303990	2.77814	3.68	0.90186
100	Point	1657690	5303990	2.76007	3.65342	0.89335
101	Point	1657700	5303990	2.77518	3.65	0.87482
102	Point	1657700	5303990	2.74855	3.64	0.89145
103	Point	1657700	5303990	2.75209	3.63653	0.88444
104	Point	1657700	5303990	2.63545	3.61757	0.98212
105	Point	1657700	5303990	2.65423	3.58561	0.93138
106	Point	1657700	5303990	2.7293	3.58033	0.85103
107	Point	1657700	5303990	2.7293	3.58033	0.85103
108	Point	1657700	5303990	2.58058	3.57151	0.99093
109	Point	1657700	5303990	2.52484	3.54531	1.02047
110	Point	1657700	5303990	2.53251	3.51	0.97749
111	Point	1657700	5303990	2.60535	3.50508	0.89973
112	Point	1657710	5303990	2.60777	3.48106	0.87329
113	Point	1657710	5303990	2.59468	3.47	0.87532
114	Point	1657710	5303990	2.56087	3.44488	0.88401
115	Point	1657710	5303990	2.48738	3.43174	0.94436
116	Point	1657710	5303990	2.47788	3.40965	0.93177
117	Point	1657710	5304000	2.46742	3.42952	0.9621
118	Point	1657710	5304000	2.44329	3.4067	0.96341
119	Point	1657710	5304000	2.49277	3.39203	0.89926
120	Point	1657710	5304000	2.4666	3.38098	0.91438
121	Point	1657710	5304000	2.4368	3.37458	0.93778
122	Point	1657710	5304000	2.44358	3.36659	0.92301
123	Point	1657720	5304000	2.4677	3.36	0.8923
124	Point	1657720	5304000	2.4677	3.36	0.8923
125	Point	1657720	5304000	2.52896	3.35112	0.82216
126	Point	1657720	5304000	2.46491	3.34578	0.88087
127	Point	1657720	5304000	2.45794	3.35	0.89206
128	Point	1657720	5304000	2.428	3.34176	0.91376
129	Point	1657720	5304000	2.43085	3.33645	0.9056
130	Point	1657720	5304000	2.42677	3.32979	0.90302
131	Point	1657720	5304000	2.43684	3.34	0.90316
132	Point	1657720	5304000	2.41946	3.33	0.91054
133	Point	1657720	5304000	2.34513	3.3303	0.98517
134	Point	1657720	5304000	2.3905	3.33974	0.94924
135	Point	1657730	5304000	2.41035	3.3305	0.92015
136	Point	1657730	5304010	2.35568	3.33757	0.98189
137	Point	1657730	5304010	2.35568	3.33757	0.98189
138	Point	1657730	5304010	2.37442	3.3322	0.95778
139	Point	1657730	5304010	2.31464	3.31039	0.99575
140	Point	1657730	5304010	2.37709	3.31246	0.93537
141	Point	1657730	5304010	2.33642	3.29291	0.95649
142	Point	1657730	5304010	2.33209	3.29	0.95791
143	Point	1657730	5304010	2.30916	3.31863	1.00947
144	Point	1657730	5304010	2.31494	3.29369	0.97875
145	Point	1657730	5304010	2.33224	3.28627	0.95403
146	Point	1657730	5304010	2.32479	3.24896	0.92417
147	Point	1657740	5304010	2.27268	3.24538	0.9727
