# Supplementary material for: Using a calibrated upper living position of marine biota to calculate coseismic uplift: a case study of the 2016 Kaikōura earthquake, New Zealand
Source: Copernicus journal article supplement (doi:10.5194/esurf-8-351-2020), 2020-05-08
Supplement: Supplementary file 1 [file Supplementary File S2.xlsx]

## Sheet: Table 3 Living depth calc
Site	Locality_name	Operator	Date_NZ	Time_NZ	Lat	Long	NZTM_X	NZTM_Y	Elev (m)	Genus	Exposure	OM	H	X cdg	Utg	MLWS tg	X=((H+OM)-Utg)-MLWS
tgs1 wl	Tide Gauge	CMR	2017-02-02	13:36:00	42°24'50.05114"S	173°42'03.58814"E	1.65768e+06	5.30403e+06	11.645				1.91
tgs2	Tide Gauge	CMR	2017-02-02	13:37:00	42°24'50.02101"S	173°42'03.69656"E	1.65768e+06	5.30403e+06	11.994	Carpophyllum	Sheltered	0.349	1.91	0.199	0.96	1.1	SUMMARY OF RTK CALIBRATION Xcdg
tgs3	Tide Gauge	CMR	2017-02-02	13:37:00	42°24'49.99298"S	173°42'03.67108"E	1.65768e+06	5.30403e+06	12.055	Carpophyllum	Sheltered	0.41	1.91	0.26			Xc RTK	Ave	SD	Median	Max	Min
tgs4	Tide Gauge	CMR	2017-02-02	13:38:00	42°24'50.35321"S	173°42'03.01428"E	1.65766e+06	5.30402e+06	12.11	Carpophyllum	Sheltered	0.465	1.91	0.315			All	0.312169	0.10443	0.319	0.495	0.005
tgs5	Tide Gauge	CMR	2017-02-02	13:38:00	42°24'50.18404"S	173°42'02.91636"E	1.65766e+06	5.30402e+06	12.089	Carpophyllum	Sheltered	0.444	1.91	0.294			Carpophyllum	0.255513	0.0916245	0.256	0.434	0.005
tgs6	Tide Gauge	CMR	2017-02-02	13:39:00	42°24'50.22232"S	173°42'02.94027"E	1.65766e+06	5.30402e+06	12.095	Carpophyllum	Sheltered	0.45	1.91	0.3			Durvillaea	0.381219	0.0733141	0.392	0.495	0.185
tgs7	Tide Gauge	CMR	2017-02-02	13:40:00	42°24'50.14139"S	173°42'02.84281"E	1.65766e+06	5.30403e+06	12.126	Carpophyllum	Sheltered	0.481	1.91	0.331
tgs8	Tide Gauge	CMR	2017-02-02	13:40:00	42°24'50.10497"S	173°42'02.78659"E	1.65766e+06	5.30403e+06	12.114	Carpophyllum	Sheltered	0.469	1.91	0.319
tgs9	Tide Gauge	CMR	2017-02-02	13:41:00	42°24'50.07976"S	173°42'02.77064"E	1.65766e+06	5.30403e+06	12.103	Carpophyllum	Sheltered	0.458	1.91	0.308
tgs10	Tide Gauge	CMR	2017-02-02	13:41:00	42°24'50.08189"S	173°42'02.75692"E	1.65766e+06	5.30403e+06	12.099	Carpophyllum	Sheltered	0.454	1.91	0.304
tgs11	Tide Gauge	CMR	2017-02-02	13:42:00	42°24'50.17821"S	173°42'02.78452"E	1.65766e+06	5.30403e+06	12.051	Carpophyllum	Sheltered	0.406	1.91	0.256
tgs12	Tide Gauge	CMR	2017-02-02	13:43:00	42°24'50.12649"S	173°42'02.64820"E	1.65766e+06	5.30403e+06	12.085	Carpophyllum	Sheltered	0.44	1.91	0.29
tgs13	Tide Gauge	CMR	2017-02-02	13:43:00	42°24'50.15267"S	173°42'02.43598"E	1.65765e+06	5.30403e+06	12.041	Carpophyllum	Sheltered	0.396	1.91	0.246
tgs14	Tide Gauge	CMR	2017-02-02	13:44:00	42°24'50.14143"S	173°42'02.39129"E	1.65765e+06	5.30403e+06	12.03	Carpophyllum	Sheltered	0.385	1.91	0.235
tgs15	Tide Gauge	CMR	2017-02-02	13:44:00	42°24'50.10912"S	173°42'02.36170"E	1.65765e+06	5.30403e+06	12.033	Carpophyllum	Sheltered	0.388	1.91	0.238
tgs16	Tide Gauge	CMR	2017-02-02	13:45:00	42°24'50.01634"S	173°42'02.37072"E	1.65765e+06	5.30403e+06	12.022	Carpophyllum	Sheltered	0.377	1.91	0.227
tgs17	Tide Gauge	CMR	2017-02-02	13:46:00	42°24'50.00160"S	173°42'02.38538"E	1.65765e+06	5.30403e+06	11.945	Carpophyllum	Sheltered	0.3	1.91	0.15
tgs18	Tide Gauge	CMR	2017-02-02	13:46:00	42°24'49.95966"S	173°42'02.37559"E	1.65765e+06	5.30403e+06	12.22	Carpophyllum	Sheltered	0.575	1.91	0.425
tgs19	Tide Gauge	CMR	2017-02-02	13:47:00	42°24'49.93057"S	173°42'02.33742"E	1.65765e+06	5.30403e+06	12.229	Carpophyllum	Sheltered	0.584	1.91	0.434
tgs20	Tide Gauge	CMR	2017-02-02	13:47:00	42°24'49.92338"S	173°42'02.39175"E	1.65765e+06	5.30403e+06	12.129	Carpophyllum	Sheltered	0.484	1.91	0.334
tgs21	Tide Gauge	CMR	2017-02-02	13:48:00	42°24'50.02899"S	173°42'02.33936"E	1.65765e+06	5.30403e+06	12.092	Carpophyllum	Sheltered	0.447	1.91	0.297
tgx1 wl	Tide Gauge	CMR	2017-02-02	13:57:00	42°24'48.43037"S	173°42'10.74145"E	1.65784e+06	5.30408e+06	11.529	Water level			1.81
tgx2	Tide Gauge	CMR	2017-02-02	13:58:00	42°24'48.43328"S	173°42'10.67832"E	1.65784e+06	5.30408e+06	12.024	Carpophyllum	Sheltered	0.495	1.81	0.245
tgx3	Tide Gauge	CMR	2017-02-02	13:58:00	42°24'48.42379"S	173°42'10.72436"E	1.65784e+06	5.30408e+06	11.914	Carpophyllum	Sheltered	0.385	1.81	0.135
tgx4	Tide Gauge	CMR	2017-02-02	13:59:00	42°24'48.41253"S	173°42'10.76498"E	1.65784e+06	5.30408e+06	11.937	Carpophyllum	Sheltered	0.408	1.81	0.158
tgx5	Tide Gauge	CMR	2017-02-02	14:00:00	42°24'48.40120"S	173°42'10.76874"E	1.65784e+06	5.30408e+06	11.903	Carpophyllum	Sheltered	0.374	1.81	0.124
tgx6	Tide Gauge	CMR	2017-02-02	14:01:00	42°24'48.39772"S	173°42'10.80610"E	1.65784e+06	5.30408e+06	11.784	Carpophyllum	Sheltered	0.255	1.81	0.005
tgx7	Tide Gauge	CMR	2017-02-02	14:01:00	42°24'48.34468"S	173°42'10.88316"E	1.65784e+06	5.30408e+06	12.06	Carpophyllum	Sheltered	0.531	1.81	0.281
tgx8	Tide Gauge	CMR	2017-02-02	14:02:00	42°24'48.25743"S	173°42'10.99546"E	1.65785e+06	5.30408e+06	11.937	Carpophyllum	Sheltered	0.408	1.81	0.158
tgx9	Tide Gauge	CMR	2017-02-02	14:03:00	42°24'48.26209"S	173°42'11.07538"E	1.65785e+06	5.30408e+06	12.029	Carpophyllum	Sheltered	0.5	1.81	0.25
tgx10	Tide Gauge	CMR	2017-02-02	14:04:00	42°24'48.11885"S	173°42'11.15650"E	1.65785e+06	5.30409e+06	11.989	Carpophyllum	Sheltered	0.46	1.81	0.21
tgx11	Tide Gauge	CMR	2017-02-02	14:04:00	42°24'48.15587"S	173°42'11.26272"E	1.65785e+06	5.30409e+06	12.098	Carpophyllum	Sheltered	0.569	1.81	0.319
tgx12	Tide Gauge	CMR	2017-02-02	14:05:00	42°24'48.18854"S	173°42'11.23507"E	1.65785e+06	5.30408e+06	12.088	Carpophyllum	Sheltered	0.559	1.81	0.309
tgx13	Tide Gauge	CMR	2017-02-02	14:06:00	42°24'48.08127"S	173°42'11.41004"E	1.65786e+06	5.30409e+06	12.198	Carpophyllum	Sheltered	0.669	1.81	0.419
tgx14	Tide Gauge	CMR	2017-02-02	14:07:00	42°24'48.06757"S	173°42'11.44642"E	1.65786e+06	5.30409e+06	12.129	Carpophyllum	Sheltered	0.6	1.81	0.35
tgx15	Tide Gauge	CMR	2017-02-02	14:07:00	42°24'48.04190"S	173°42'11.43489"E	1.65786e+06	5.30409e+06	12.132	Carpophyllum	Sheltered	0.603	1.81	0.353
tgx16	Tide Gauge	CMR	2017-02-02	14:08:00	42°24'48.00063"S	173°42'11.38446"E	1.65786e+06	5.30409e+06	11.999	Carpophyllum	Sheltered	0.47	1.81	0.22
tgx17	Tide Gauge	CMR	2017-02-02	14:09:00	42°24'47.90701"S	173°42'11.41247"E	1.65786e+06	5.30409e+06	11.952	Carpophyllum	Sheltered	0.423	1.81	0.173
tgx18	Tide Gauge	CMR	2017-02-02	14:10:00	42°24'47.90545"S	173°42'11.62335"E	1.65786e+06	5.30409e+06	12.025	Carpophyllum	Sheltered	0.496	1.81	0.246
tgx19	Tide Gauge	CMR	2017-02-02	14:10:00	42°24'47.57642"S	173°42'11.55339"E	1.65786e+06	5.3041e+06	11.891	Carpophyllum	Sheltered	0.362	1.81	0.112
tgx20	Tide Gauge	CMR	2017-02-02	14:11:00	42°24'47.61696"S	173°42'11.59082"E	1.65786e+06	5.3041e+06	11.915	Carpophyllum	Sheltered	0.386	1.81	0.136
water2_tg	Tide Gauge	SKK	2017-02-08	20:00:00	42°24'47.86213"S	173°42'08.80030"E	1.6578e+06	5.3041e+06	11.11	Water level
tg d s 1	Tide Gauge	SKK	2017-02-08	20:01:00	42°24'47.89233"S	173°42'08.72824"E	1.6578e+06	5.30409e+06	12.298	Durvillaea	Sheltered	1.188	1.32	0.448
tg d s 2	Tide Gauge	SKK	2017-02-08	20:01:00	42°24'47.95738"S	173°42'08.77185"E	1.6578e+06	5.30409e+06	12.194	Durvillaea	Sheltered	1.084	1.32	0.344
tg d s 3	Tide Gauge	SKK	2017-02-08	20:02:00	42°24'47.97073"S	173°42'08.85551"E	1.6578e+06	5.30409e+06	12.035	Durvillaea	Sheltered	0.925	1.32	0.185
tg d s 4	Tide Gauge	SKK	2017-02-08	20:02:00	42°24'47.95993"S	173°42'08.97717"E	1.6578e+06	5.30409e+06	12.291	Durvillaea	Sheltered	1.181	1.32	0.441
tg d s 5	Tide Gauge	SKK	2017-02-08	20:02:00	42°24'48.14793"S	173°42'08.71966"E	1.6578e+06	5.30409e+06	12.254	Durvillaea	Sheltered	1.144	1.32	0.404
tg d s 6	Tide Gauge	SKK	2017-02-08	20:03:00	42°24'48.14867"S	173°42'08.73680"E	1.6578e+06	5.30409e+06	12.243	Durvillaea	Sheltered	1.133	1.32	0.393
tg d s 7	Tide Gauge	SKK	2017-02-08	20:03:00	42°24'48.14867"S	173°42'08.69661"E	1.65779e+06	5.30409e+06	12.306	Durvillaea	Sheltered	1.196	1.32	0.456
tg d s 8	Tide Gauge	SKK	2017-02-08	20:04:00	42°24'48.11678"S	173°42'08.72659"E	1.6578e+06	5.30409e+06	12.167	Durvillaea	Sheltered	1.057	1.32	0.317
tg d s 9	Tide Gauge	SKK	2017-02-08	20:04:00	42°24'48.10302"S	173°42'08.70339"E	1.65779e+06	5.30409e+06	12.24	Durvillaea	Sheltered	1.13	1.32	0.39
tg d s 10	Tide Gauge	SKK	2017-02-08	20:04:00	42°24'48.09626"S	173°42'08.62200"E	1.65779e+06	5.30409e+06	12.208	Durvillaea	Sheltered	1.098	1.32	0.358
tg d s 11	Tide Gauge	SKK	2017-02-08	20:05:00	42°24'48.08959"S	173°42'08.61405"E	1.65779e+06	5.30409e+06	12.207	Durvillaea	Sheltered	1.097	1.32	0.357
tg d s 12	Tide Gauge	SKK	2017-02-08	20:05:00	42°24'47.75998"S	173°42'08.82198"E	1.6578e+06	5.3041e+06	12.039	Durvillaea	Sheltered	0.929	1.32	0.189
tg d s 13	Tide Gauge	SKK	2017-02-08	20:05:00	42°24'47.77245"S	173°42'08.84654"E	1.6578e+06	5.3041e+06	12.254	Durvillaea	Sheltered	1.144	1.32	0.404
tg d s 14	Tide Gauge	SKK	2017-02-08	20:06:00	42°24'47.78151"S	173°42'08.84975"E	1.6578e+06	5.3041e+06	12.219	Durvillaea	Sheltered	1.109	1.32	0.369
tg d_2 s 1	Tide Gauge	SKK	2017-02-08	20:13:00	42°24'47.19920"S	173°42'10.57454"E	1.65784e+06	5.30412e+06	12.317	Durvillaea	Sheltered	1.207	1.32	0.467
tg d_2 s 2	Tide Gauge	SKK	2017-02-08	20:13:00	42°24'47.22512"S	173°42'10.54941"E	1.65784e+06	5.30411e+06	12.299	Durvillaea	Sheltered	1.189	1.32	0.449
tg d_2 s 3	Tide Gauge	SKK	2017-02-08	20:13:00	42°24'47.24896"S	173°42'10.60279"E	1.65784e+06	5.30411e+06	12.254	Durvillaea	Sheltered	1.144	1.32	0.404
tg d_2 s 4	Tide Gauge	SKK	2017-02-08	20:14:00	42°24'47.26126"S	173°42'10.65841"E	1.65784e+06	5.30411e+06	12.292	Durvillaea	Sheltered	1.182	1.32	0.442
tg d_2 s 5	Tide Gauge	SKK	2017-02-08	20:14:00	42°24'47.25970"S	173°42'10.73518"E	1.65784e+06	5.30411e+06	12.266	Durvillaea	Sheltered	1.156	1.32	0.416
tg d_2 s 6	Tide Gauge	SKK	2017-02-08	20:15:00	42°24'47.33051"S	173°42'10.82470"E	1.65784e+06	5.30411e+06	12.241	Durvillaea	Sheltered	1.131	1.32	0.391
tg d_2 s 7	Tide Gauge	SKK	2017-02-08	20:15:00	42°24'47.34152"S	173°42'10.90780"E	1.65785e+06	5.30411e+06	12.248	Durvillaea	Sheltered	1.138	1.32	0.398
tg d_2 s 8	Tide Gauge	SKK	2017-02-08	20:16:00	42°24'47.24684"S	173°42'10.90147"E	1.65785e+06	5.30411e+06	12.205	Durvillaea	Sheltered	1.095	1.32	0.355
tg d_2 s 9	Tide Gauge	SKK	2017-02-08	20:16:00	42°24'47.03259"S	173°42'11.38869"E	1.65786e+06	5.30412e+06	12.27	Durvillaea	Sheltered	1.16	1.32	0.42
tg d_2 s 10	Tide Gauge	SKK	2017-02-08	20:16:00	42°24'46.94568"S	173°42'11.51735"E	1.65786e+06	5.30412e+06	12.212	Durvillaea	Sheltered	1.102	1.32	0.362
tg d_2 s 11	Tide Gauge	SKK	2017-02-08	20:17:00	42°24'46.94020"S	173°42'11.54896"E	1.65786e+06	5.30412e+06	12.229	Durvillaea	Sheltered	1.119	1.32	0.379
tg d_2 s 12	Tide Gauge	SKK	2017-02-08	20:17:00	42°24'46.93592"S	173°42'11.40365"E	1.65786e+06	5.30412e+06	12.22	Durvillaea	Sheltered	1.11	1.32	0.37
tg d_2 s 13	Tide Gauge	SKK	2017-02-08	20:18:00	42°24'46.88086"S	173°42'11.38486"E	1.65786e+06	5.30413e+06	12.2	Durvillaea	Sheltered	1.09	1.32	0.35
tg d_2 s 14	Tide Gauge	SKK	2017-02-08	20:18:00	42°24'46.85913"S	173°42'11.46816"E	1.65786e+06	5.30413e+06	12.08	Durvillaea	Sheltered	0.97	1.32	0.23
tg d_2 s 15	Tide Gauge	SKK	2017-02-08	20:19:00	42°24'46.80921"S	173°42'11.41509"E	1.65786e+06	5.30413e+06	12.181	Durvillaea	Sheltered	1.071	1.32	0.331
tg d_2 s 16	Tide Gauge	SKK	2017-02-08	20:19:00	42°24'46.73815"S	173°42'11.45995"E	1.65786e+06	5.30413e+06	12.259	Durvillaea	Sheltered	1.149	1.32	0.409
tg d_3 d s	Tide Gauge	SKK	2017-02-08	20:26:00	42°24'44.62654"S	173°42'14.06038"E	1.65792e+06	5.30419e+06	12.345	Durvillaea	Sheltered	1.235	1.32	0.495
tg d_3 d t	Tide Gauge	SKK	2017-02-08	20:28:00	42°24'44.57407"S	173°42'14.02823"E	1.65792e+06	5.3042e+06	12.326	Durvillaea	Sheltered	1.216	1.32	0.476

## Sheet: Table 4 RTK data
Site	Locality_name	Operator	Date_NZ	Time_NZ	Latitude	Longitude	NZTM_X	NZTM_Y	Elev (m)	Genus	Exposure	OM	H	UB(TG)	MLWS	X C/D	Mean UB(TG) per site
																(see table 4 tab)
tgs1 wl	Tide Gauge	CMR	2017-02-02	1336	42°24'50.05114"S	173°42'03.58814"E	5.30403e+06	1.65768e+06	11.645	Water level
tgs2	Tide Gauge	CMR	2017-02-02	1336.6	42°24'50.02101"S	173°42'03.69656"E	5.30403e+06	1.65768e+06	11.994	Carpophyllum	Sheltered	0.349	1.909	0.898	1.1	0.26	0.9871		Table 4
tgs3	Tide Gauge	CMR	2017-02-02	1337.2	42°24'49.99298"S	173°42'03.67108"E	5.30403e+06	1.65768e+06	12.055	Carpophyllum	Sheltered	0.41	1.909	0.959						Mean	SD	MIN	MAX
tgs4	Tide Gauge	CMR	2017-02-02	1337.8	42°24'50.35321"S	173°42'03.01428"E	5.30402e+06	1.65766e+06	12.11	Carpophyllum	Sheltered	0.465	1.909	1.014					all data	0.967052	0.0838732	0.707	1.133
tgs5	Tide Gauge	CMR	2017-02-02	1338.4	42°24'50.18404"S	173°42'02.91636"E	5.30402e+06	1.65766e+06	12.089	Carpophyllum	Sheltered	0.444	1.909	0.993					Carpophyllum	0.955974	0.0910739	0.707	1.133
tgs6	Tide Gauge	CMR	2017-02-02	1339	42°24'50.22232"S	173°42'02.94027"E	5.30402e+06	1.65766e+06	12.095	Carpophyllum	Sheltered	0.45	1.909	0.999					Durvillaea	0.980552	0.0733141	0.784333	1.09433
tgs7	Tide Gauge	CMR	2017-02-02	1339.6	42°24'50.14139"S	173°42'02.84281"E	5.30403e+06	1.65766e+06	12.126	Carpophyllum	Sheltered	0.481	1.909	1.03
tgs8	Tide Gauge	CMR	2017-02-02	1340.2	42°24'50.10497"S	173°42'02.78659"E	5.30403e+06	1.65766e+06	12.114	Carpophyllum	Sheltered	0.469	1.909	1.018
tgs9	Tide Gauge	CMR	2017-02-02	1340.8	42°24'50.07976"S	173°42'02.77064"E	5.30403e+06	1.65766e+06	12.103	Carpophyllum	Sheltered	0.458	1.909	1.007
tgs10	Tide Gauge	CMR	2017-02-02	1341.4	42°24'50.08189"S	173°42'02.75692"E	5.30403e+06	1.65766e+06	12.099	Carpophyllum	Sheltered	0.454	1.909	1.003
tgs11	Tide Gauge	CMR	2017-02-02	1342	42°24'50.17821"S	173°42'02.78452"E	5.30403e+06	1.65766e+06	12.051	Carpophyllum	Sheltered	0.406	1.909	0.955
tgs12	Tide Gauge	CMR	2017-02-02	1342.6	42°24'50.12649"S	173°42'02.64820"E	5.30403e+06	1.65766e+06	12.085	Carpophyllum	Sheltered	0.44	1.909	0.989
tgs13	Tide Gauge	CMR	2017-02-02	1343.2	42°24'50.15267"S	173°42'02.43598"E	5.30403e+06	1.65765e+06	12.041	Carpophyllum	Sheltered	0.396	1.909	0.945
tgs14	Tide Gauge	CMR	2017-02-02	1343.8	42°24'50.14143"S	173°42'02.39129"E	5.30403e+06	1.65765e+06	12.03	Carpophyllum	Sheltered	0.385	1.909	0.934
tgs15	Tide Gauge	CMR	2017-02-02	1344.4	42°24'50.10912"S	173°42'02.36170"E	5.30403e+06	1.65765e+06	12.033	Carpophyllum	Sheltered	0.388	1.909	0.937
tgs16	Tide Gauge	CMR	2017-02-02	1345	42°24'50.01634"S	173°42'02.37072"E	5.30403e+06	1.65765e+06	12.022	Carpophyllum	Sheltered	0.377	1.909	0.926
tgs17	Tide Gauge	CMR	2017-02-02	1345.6	42°24'50.00160"S	173°42'02.38538"E	5.30403e+06	1.65765e+06	11.945	Carpophyllum	Sheltered	0.3	1.909	0.849
tgs18	Tide Gauge	CMR	2017-02-02	1346.2	42°24'49.95966"S	173°42'02.37559"E	5.30403e+06	1.65765e+06	12.22	Carpophyllum	Sheltered	0.575	1.909	1.124
tgs19	Tide Gauge	CMR	2017-02-02	1346.8	42°24'49.93057"S	173°42'02.33742"E	5.30403e+06	1.65765e+06	12.229	Carpophyllum	Sheltered	0.584	1.909	1.133
tgs20	Tide Gauge	CMR	2017-02-02	1347.4	42°24'49.92338"S	173°42'02.39175"E	5.30403e+06	1.65765e+06	12.129	Carpophyllum	Sheltered	0.484	1.909	1.033
tgs21	Tide Gauge	CMR	2017-02-02	1348	42°24'50.02899"S	173°42'02.33936"E	5.30403e+06	1.65765e+06	12.092	Carpophyllum	Sheltered	0.447	1.909	0.996
tgx1 wl	Tide Gauge	CMR	2017-02-02	1357	42°24'48.43037"S	173°42'10.74145"E	5.30408e+06	1.65784e+06	11.529	Water level
tgx2	Tide Gauge	CMR	2017-02-02	1357.74	42°24'48.43328"S	173°42'10.67832"E	5.30408e+06	1.65784e+06	12.024	Carpophyllum	Sheltered	0.495	1.812	0.947	1.1	0.26	0.923211
tgx3	Tide Gauge	CMR	2017-02-02	1358.47	42°24'48.42379"S	173°42'10.72436"E	5.30408e+06	1.65784e+06	11.914	Carpophyllum	Sheltered	0.385	1.812	0.837
tgx4	Tide Gauge	CMR	2017-02-02	1359.21	42°24'48.41253"S	173°42'10.76498"E	5.30408e+06	1.65784e+06	11.937	Carpophyllum	Sheltered	0.408	1.812	0.86
tgx5	Tide Gauge	CMR	2017-02-02	1359.95	42°24'48.40120"S	173°42'10.76874"E	5.30408e+06	1.65784e+06	11.903	Carpophyllum	Sheltered	0.374	1.812	0.826
tgx6	Tide Gauge	CMR	2017-02-02	1400.69	42°24'48.39772"S	173°42'10.80610"E	5.30408e+06	1.65784e+06	11.784	Carpophyllum	Sheltered	0.255	1.812	0.707
tgx7	Tide Gauge	CMR	2017-02-02	1401.42	42°24'48.34468"S	173°42'10.88316"E	5.30408e+06	1.65784e+06	12.06	Carpophyllum	Sheltered	0.531	1.812	0.983
tgx8	Tide Gauge	CMR	2017-02-02	1402.16	42°24'48.25743"S	173°42'10.99546"E	5.30408e+06	1.65785e+06	11.937	Carpophyllum	Sheltered	0.408	1.812	0.86
tgx9	Tide Gauge	CMR	2017-02-02	1402.9	42°24'48.26209"S	173°42'11.07538"E	5.30408e+06	1.65785e+06	12.029	Carpophyllum	Sheltered	0.5	1.812	0.952
tgx10	Tide Gauge	CMR	2017-02-02	1403.63	42°24'48.11885"S	173°42'11.15650"E	5.30409e+06	1.65785e+06	11.989	Carpophyllum	Sheltered	0.46	1.812	0.912
tgx11	Tide Gauge	CMR	2017-02-02	1404.37	42°24'48.15587"S	173°42'11.26272"E	5.30409e+06	1.65785e+06	12.098	Carpophyllum	Sheltered	0.569	1.812	1.021
tgx12	Tide Gauge	CMR	2017-02-02	1405.11	42°24'48.18854"S	173°42'11.23507"E	5.30408e+06	1.65785e+06	12.088	Carpophyllum	Sheltered	0.559	1.812	1.011
tgx13	Tide Gauge	CMR	2017-02-02	1405.84	42°24'48.08127"S	173°42'11.41004"E	5.30409e+06	1.65786e+06	12.198	Carpophyllum	Sheltered	0.669	1.812	1.121
tgx14	Tide Gauge	CMR	2017-02-02	1406.58	42°24'48.06757"S	173°42'11.44642"E	5.30409e+06	1.65786e+06	12.129	Carpophyllum	Sheltered	0.6	1.812	1.052
tgx15	Tide Gauge	CMR	2017-02-02	1407.32	42°24'48.04190"S	173°42'11.43489"E	5.30409e+06	1.65786e+06	12.132	Carpophyllum	Sheltered	0.603	1.812	1.055
tgx16	Tide Gauge	CMR	2017-02-02	1408.06	42°24'48.00063"S	173°42'11.38446"E	5.30409e+06	1.65786e+06	11.999	Carpophyllum	Sheltered	0.47	1.812	0.922
tgx17	Tide Gauge	CMR	2017-02-02	1408.79	42°24'47.90701"S	173°42'11.41247"E	5.30409e+06	1.65786e+06	11.952	Carpophyllum	Sheltered	0.423	1.812	0.875
tgx18	Tide Gauge	CMR	2017-02-02	1409.53	42°24'47.90545"S	173°42'11.62335"E	5.30409e+06	1.65786e+06	12.025	Carpophyllum	Sheltered	0.496	1.812	0.948
tgx19	Tide Gauge	CMR	2017-02-02	1410.27	42°24'47.57642"S	173°42'11.55339"E	5.3041e+06	1.65786e+06	11.891	Carpophyllum	Sheltered	0.362	1.812	0.814
tgx20	Tide Gauge	CMR	2017-02-02	1411	42°24'47.61696"S	173°42'11.59082"E	5.3041e+06	1.65786e+06	11.915	Carpophyllum	Sheltered	0.386	1.812	0.838
water1	Tide Gauge	SKK	2017-02-08	2000	42°24'47.87287"S	173°42'08.81881"E	5.3041e+06	1.6578e+06	11.106	Water level
water2	Tide Gauge	SKK	2017-02-08	2000	42°24'47.86213"S	173°42'08.80030"E	5.3041e+06	1.6578e+06	11.11	Water level
water3	Tide Gauge	SKK	2017-02-08	2000	42°24'47.84738"S	173°42'08.79427"E	5.3041e+06	1.6578e+06	11.056	Water level
								mean	11.0907
tg d s 1	Tide Gauge	SKK	2017-02-08	20:01:00	42°24'47.89233"S	173°42'08.72824"E	5.30409e+06	1.6578e+06	12.298	Durvillaea	Sheltered	1.20733	1.32	1.04733	1.1	0.38	0.980552
tg d s 2	Tide Gauge	SKK	2017-02-08	20:01:00	42°24'47.95738"S	173°42'08.77185"E	5.30409e+06	1.6578e+06	12.194	Durvillaea	Sheltered	1.10333	1.32	0.943333
tg d s 3	Tide Gauge	SKK	2017-02-08	20:02:00	42°24'47.97073"S	173°42'08.85551"E	5.30409e+06	1.6578e+06	12.035	Durvillaea	Sheltered	0.944333	1.32	0.784333
tg d s 4	Tide Gauge	SKK	2017-02-08	20:02:00	42°24'47.95993"S	173°42'08.97717"E	5.30409e+06	1.6578e+06	12.291	Durvillaea	Sheltered	1.20033	1.32	1.04033
tg d s 5	Tide Gauge	SKK	2017-02-08	20:02:00	42°24'48.14793"S	173°42'08.71966"E	5.30409e+06	1.6578e+06	12.254	Durvillaea	Sheltered	1.16333	1.32	1.00333
tg d s 6	Tide Gauge	SKK	2017-02-08	20:03:00	42°24'48.14867"S	173°42'08.73680"E	5.30409e+06	1.6578e+06	12.243	Durvillaea	Sheltered	1.15233	1.32	0.992333
tg d s 7	Tide Gauge	SKK	2017-02-08	20:03:00	42°24'48.14867"S	173°42'08.69661"E	5.30409e+06	1.65779e+06	12.306	Durvillaea	Sheltered	1.21533	1.32	1.05533
tg d s 8	Tide Gauge	SKK	2017-02-08	20:04:00	42°24'48.11678"S	173°42'08.72659"E	5.30409e+06	1.6578e+06	12.167	Durvillaea	Sheltered	1.07633	1.32	0.916333
tg d s 9	Tide Gauge	SKK	2017-02-08	20:04:00	42°24'48.10302"S	173°42'08.70339"E	5.30409e+06	1.65779e+06	12.24	Durvillaea	Sheltered	1.14933	1.32	0.989333
tg d s 10	Tide Gauge	SKK	2017-02-08	20:04:00	42°24'48.09626"S	173°42'08.62200"E	5.30409e+06	1.65779e+06	12.208	Durvillaea	Sheltered	1.11733	1.32	0.957333
tg d s 11	Tide Gauge	SKK	2017-02-08	20:05:00	42°24'48.08959"S	173°42'08.61405"E	5.30409e+06	1.65779e+06	12.207	Durvillaea	Sheltered	1.11633	1.32	0.956333
tg d s 12	Tide Gauge	SKK	2017-02-08	20:05:00	42°24'47.75998"S	173°42'08.82198"E	5.3041e+06	1.6578e+06	12.039	Durvillaea	Sheltered	0.948333	1.32	0.788333
tg d s 13	Tide Gauge	SKK	2017-02-08	20:05:00	42°24'47.77245"S	173°42'08.84654"E	5.3041e+06	1.6578e+06	12.254	Durvillaea	Sheltered	1.16333	1.32	1.00333
tg d s 14	Tide Gauge	SKK	2017-02-08	20:06:00	42°24'47.78151"S	173°42'08.84975"E	5.3041e+06	1.6578e+06	12.219	Durvillaea	Sheltered	1.12833	1.32	0.968333
tg d_2 s 1	Tide Gauge	SKK	2017-02-08	20:13:00	42°24'47.19920"S	173°42'10.57454"E	5.30412e+06	1.65784e+06	12.317	Durvillaea	Sheltered	1.22633	1.32	1.06633
tg d_2 s 2	Tide Gauge	SKK	2017-02-08	20:13:00	42°24'47.22512"S	173°42'10.54941"E	5.30411e+06	1.65784e+06	12.299	Durvillaea	Sheltered	1.20833	1.32	1.04833
tg d_2 s 3	Tide Gauge	SKK	2017-02-08	20:13:00	42°24'47.24896"S	173°42'10.60279"E	5.30411e+06	1.65784e+06	12.254	Durvillaea	Sheltered	1.16333	1.32	1.00333
tg d_2 s 4	Tide Gauge	SKK	2017-02-08	20:14:00	42°24'47.26126"S	173°42'10.65841"E	5.30411e+06	1.65784e+06	12.292	Durvillaea	Sheltered	1.20133	1.32	1.04133
tg d_2 s 5	Tide Gauge	SKK	2017-02-08	20:14:00	42°24'47.25970"S	173°42'10.73518"E	5.30411e+06	1.65784e+06	12.266	Durvillaea	Sheltered	1.17533	1.32	1.01533
tg d_2 s 6	Tide Gauge	SKK	2017-02-08	20:15:00	42°24'47.33051"S	173°42'10.82470"E	5.30411e+06	1.65784e+06	12.241	Durvillaea	Sheltered	1.15033	1.32	0.990333
tg d_2 s 7	Tide Gauge	SKK	2017-02-08	20:15:00	42°24'47.34152"S	173°42'10.90780"E	5.30411e+06	1.65785e+06	12.248	Durvillaea	Sheltered	1.15733	1.32	0.997333
tg d_2 s 8	Tide Gauge	SKK	2017-02-08	20:16:00	42°24'47.24684"S	173°42'10.90147"E	5.30411e+06	1.65785e+06	12.205	Durvillaea	Sheltered	1.11433	1.32	0.954333
tg d_2 s 9	Tide Gauge	SKK	2017-02-08	20:16:00	42°24'47.03259"S	173°42'11.38869"E	5.30412e+06	1.65786e+06	12.27	Durvillaea	Sheltered	1.17933	1.32	1.01933
tg d_2 s 10	Tide Gauge	SKK	2017-02-08	20:16:00	42°24'46.94568"S	173°42'11.51735"E	5.30412e+06	1.65786e+06	12.212	Durvillaea	Sheltered	1.12133	1.32	0.961333
tg d_2 s 11	Tide Gauge	SKK	2017-02-08	20:17:00	42°24'46.94020"S	173°42'11.54896"E	5.30412e+06	1.65786e+06	12.229	Durvillaea	Sheltered	1.13833	1.32	0.978333
tg d_2 s 12	Tide Gauge	SKK	2017-02-08	20:17:00	42°24'46.93592"S	173°42'11.40365"E	5.30412e+06	1.65786e+06	12.22	Durvillaea	Sheltered	1.12933	1.32	0.969333
tg d_2 s 13	Tide Gauge	SKK	2017-02-08	20:18:00	42°24'46.88086"S	173°42'11.38486"E	5.30413e+06	1.65786e+06	12.2	Durvillaea	Sheltered	1.10933	1.32	0.949333
tg d_2 s 14	Tide Gauge	SKK	2017-02-08	20:18:00	42°24'46.85913"S	173°42'11.46816"E	5.30413e+06	1.65786e+06	12.08	Durvillaea	Sheltered	0.989333	1.32	0.829333
tg d_2 s 15	Tide Gauge	SKK	2017-02-08	20:19:00	42°24'46.80921"S	173°42'11.41509"E	5.30413e+06	1.65786e+06	12.181	Durvillaea	Sheltered	1.09033	1.32	0.930333
tg d_2 s 16	Tide Gauge	SKK	2017-02-08	20:19:00	42°24'46.73815"S	173°42'11.45995"E	5.30413e+06	1.65786e+06	12.259	Durvillaea	Sheltered	1.16833	1.32	1.00833
tg d_3 d s	Tide Gauge	SKK	2017-02-08	20:26:00	42°24'44.62654"S	173°42'14.06038"E	5.30419e+06	1.65792e+06	12.345	Durvillaea	Sheltered	1.25433	1.32	1.09433
tg d_3 d t	Tide Gauge	SKK	2017-02-08	20:28:00	42°24'44.57407"S	173°42'14.02823"E	5.3042e+06	1.65792e+06	12.326	Durvillaea	Sheltered	1.23533	1.32	1.07533

## Sheet:  Table 4 Tape Measure data
Data point	Locality	Collector	Date	NZ_Time	X_coord	Y_coord	Genus	Exposure	OM	H	MLWS	X	U	mean
a	Tide gauge	VM	2017-02-02	13:35:00	1657663	5304021	Carpophyllum	Exposed	0.6	1.885	1.1	0.26	1.125	1.05455
b	Tide gauge	VM	2017-02-02		42°24'50.3"	173°42'03.0"	Carpophyllum	Exposed	0.55	1.885	1.1	0.26	1.075
c	Tide gauge	VM	2017-02-02		42°24'50.3"	173°42'03.0"	Carpophyllum	Exposed	0.6	1.885	1.1	0.26	1.125
d	Tide gauge	VM	2017-02-02		42°24'50.3"	173°42'03.0"	Carpophyllum	Sheltered	0.5	1.885	1.1	0.26	1.025		All data	1.05224	0.106336	0.871	1.354
e	Tide gauge	VM	2017-02-02		42°24'50.3"	173°42'03.0"	Carpophyllum	Exposed	0.55	1.885	1.1	0.26	1.075		Durvillaea sheltered	1.09971	0.126169	0.908	1.354
f	Tide gauge	VM	2017-02-02		42°24'50.3"	173°42'03.0"	Carpophyllum	Sheltered	0.6	1.885	1.1	0.26	1.125		Durvillaea exposed	1.2134	0.0903772	1.068	1.354
g	Tide gauge	VM	2017-02-02		42°24'50.3"	173°42'03.0"	Carpophyllum	Sheltered	0.55	1.885	1.1	0.26	1.075		Carpophyllum sheltered	0.981167	0.0609011	0.871	1.125
h	Tide gauge	VM	2017-02-02		42°24'50.3"	173°42'03.0"	Carpophyllum	Sheltered	0.5	1.885	1.1	0.26	1.025		Carpophyllum exposed	1.06056	0.0708892	0.921	1.224
i	Tide gauge	VM	2017-02-02		42°24'50.3"	173°42'03.0"	Carpophyllum	Sheltered	0.5	1.885	1.1	0.26	1.025
j	Tide gauge	VM	2017-02-02		42°24'50.3"	173°42'03.0"	Carpophyllum	Sheltered	0.45	1.885	1.1	0.26	0.975
k	Tide gauge	VM	2017-02-02		42°24'50.3"	173°42'03.0"	Carpophyllum	Sheltered	0.4	1.885	1.1	0.26	0.925
l	Tide gauge	VM	2017-02-02		42°24'50.3"	173°42'03.0"	Carpophyllum	Sheltered	0.5	1.885	1.1	0.26	1.025
o	Tide gauge	VM	2017-02-02		42°24'50.3"	173°42'03.0"	Carpophyllum	Exposed	0.55	1.885	1.1	0.26	1.075
m	Tide gauge	VM	2017-02-02		42°24'50.3"	173°42'03.0"	Carpophyllum	Exposed	0.55	1.885	1.1	0.26	1.075
n	Tide gauge	VM	2017-02-02		42°24'50.3"	173°42'03.0"	Carpophyllum	Exposed	0.5	1.885	1.1	0.26	1.025
o	Tide gauge	VM	2017-02-02		42°24'50.3"	173°42'03.0"	Carpophyllum	Exposed	0.5	1.885	1.1	0.26	1.025
p	Tide gauge	VM	2017-02-02		42°24'50.3"	173°42'03.0"	Carpophyllum	Exposed	0.55	1.885	1.1	0.26	1.075
q	Tide gauge	VM	2017-02-02		42°24'50.3"	173°42'03.0"	Carpophyllum	Exposed	0.55	1.885	1.1	0.26	1.075
r	Tide gauge	VM	2017-02-02		42°24'50.3"	173°42'03.0"	Carpophyllum	Exposed	0.5	1.885	1.1	0.26	1.025
s	Tide gauge	VM	2017-02-02		42°24'50.3"	173°42'03.0"	Carpophyllum	Exposed	0.6	1.885	1.1	0.26	1.125
t	Tide gauge	VM	2017-02-02		42°24'50.3"	173°42'03.0"	Carpophyllum	Exposed	0.5	1.885	1.1	0.26	1.025
u	Tide gauge	VM	2017-02-02	13:45:00	42°24'50.3"	173°42'03.0"	Carpophyllum	Exposed	0.55	1.885	1.1	0.26	1.075
a	Tide gauge	VM	2017-02-02	13:57:00	1657810	5304041	Carpophyllum	Exposed	0.5	1.781	1.1	0.26	0.921	0.954333
b	Tide gauge	VM	2017-02-02		42°24'49.6"	173°42'09.4"	Carpophyllum	Exposed	0.6	1.781	1.1	0.26	1.021
c	Tide gauge	VM	2017-02-02		42°24'49.6"	173°42'09.4"	Carpophyllum	Exposed	0.55	1.781	1.1	0.26	0.971
d	Tide gauge	VM	2017-02-02		42°24'49.6"	173°42'09.4"	Carpophyllum	Exposed	0.5	1.781	1.1	0.26	0.921
e	Tide gauge	VM	2017-02-02		42°24'49.6"	173°42'09.4"	Carpophyllum	Exposed	0.5	1.781	1.1	0.26	0.921
f	Tide gauge	VM	2017-02-02		42°24'49.6"	173°42'09.4"	Carpophyllum	Exposed	0.55	1.781	1.1	0.26	0.971
g	Tide gauge	VM	2017-02-02		42°24'49.6"	173°42'09.4"	Carpophyllum	Exposed	0.6	1.781	1.1	0.26	1.021
h	Tide gauge	VM	2017-02-02		42°24'49.6"	173°42'09.4"	Carpophyllum	Sheltered	0.55	1.781	1.1	0.26	0.971
i	Tide gauge	VM	2017-02-02		42°24'49.6"	173°42'09.4"	Carpophyllum	Sheltered	0.6	1.781	1.1	0.26	1.021
j	Tide gauge	VM	2017-02-02		42°24'49.6"	173°42'09.4"	Carpophyllum	Sheltered	0.6	1.781	1.1	0.26	1.021
k	Tide gauge	VM	2017-02-02		42°24'49.6"	173°42'09.4"	Carpophyllum	Sheltered	0.55	1.781	1.1	0.26	0.971
l	Tide gauge	VM	2017-02-02		42°24'49.6"	173°42'09.4"	Carpophyllum	Sheltered	0.6	1.781	1.1	0.26	1.021
m	Tide gauge	VM	2017-02-02		42°24'49.6"	173°42'09.4"	Carpophyllum	Sheltered	0.5	1.781	1.1	0.26	0.921
n	Tide gauge	VM	2017-02-02		42°24'49.6"	173°42'09.4"	Carpophyllum	Sheltered	0.55	1.781	1.1	0.26	0.971
o	Tide gauge	VM	2017-02-02		42°24'49.6"	173°42'09.4"	Carpophyllum	Sheltered	0.5	1.781	1.1	0.26	0.921
p	Tide gauge	VM	2017-02-02		42°24'49.6"	173°42'09.4"	Carpophyllum	Sheltered	0.5	1.781	1.1	0.26	0.921
q	Tide gauge	VM	2017-02-02		42°24'49.6"	173°42'09.4"	Carpophyllum	Sheltered	0.5	1.781	1.1	0.26	0.921
r	Tide gauge	VM	2017-02-02		42°24'49.6"	173°42'09.4"	Carpophyllum	Sheltered	0.45	1.781	1.1	0.26	0.871
s	Tide gauge	VM	2017-02-02		42°24'49.6"	173°42'09.4"	Carpophyllum	Sheltered	0.5	1.781	1.1	0.26	0.921
t	Tide gauge	VM	2017-02-02		42°24'49.6"	173°42'09.4"	Carpophyllum	Sheltered	0.5	1.781	1.1	0.26	0.921
u	Tide gauge	VM	2017-02-02	14:10:00	42°24'49.6"	173°42'09.4"	Carpophyllum	Sheltered	0.5	1.781	1.1	0.26	0.921
a	Tide gauge	AN	2017-02-02	13:35:00	1657711	5304052	Carpophyllum	Sheltered	0.52	1.848	1.1	0.26	1.008	0.989579
b	Tide gauge	AN	2017-02-02		1657711	5304052	Carpophyllum	Sheltered	0.42	1.848	1.1	0.26	0.908
c	Tide gauge	AN	2017-02-02		1657711	5304052	Carpophyllum	Sheltered	0.5	1.848	1.1	0.26	0.988
d	Tide gauge	AN	2017-02-02		1657711	5304052	Carpophyllum	Sheltered	0.53	1.848	1.1	0.26	1.018
e	Tide gauge	AN	2017-02-02		1657711	5304052	Durvillaea	Sheltered	0.54	1.848	1.1	0.38	0.908
f	Tide gauge	AN	2017-02-02		1657711	5304052	Carpophyllum	Sheltered	0.4	1.848	1.1	0.26	0.888
g	Tide gauge	AN	2017-02-02		1657711	5304052	Carpophyllum	Sheltered	0.5	1.848	1.1	0.26	0.988
h	Tide gauge	AN	2017-02-02		1657711	5304052	Carpophyllum	Sheltered	0.46	1.848	1.1	0.26	0.948
i	Tide gauge	AN	2017-02-02		1657711	5304052	Carpophyllum	Sheltered	0.48	1.848	1.1	0.26	0.968
j	Tide gauge	AN	2017-02-02		1657711	5304052	Carpophyllum	Sheltered	0.5	1.848	1.1	0.26	0.988
k	Tide gauge	AN	2017-02-02		1657711	5304052	Durvillaea	Sheltered	0.6	1.848	1.1	0.38	0.968
l	Tide gauge	AN	2017-02-02		1657711	5304052	Durvillaea	Sheltered	0.6	1.848	1.1	0.38	0.968
m	Tide gauge	AN	2017-02-02		1657711	5304052	Carpophyllum	Sheltered	0.5	1.848	1.1	0.26	0.988
n	Tide gauge	AN	2017-02-02		1657711	5304052	Durvillaea	Sheltered	0.53	1.848	1.1	0.31	0.968
o	Tide gauge	AN	2017-02-02		1657711	5304052	Carpophyllum	Sheltered	0.6	1.848	1.1	0.26	1.088
p	Tide gauge	AN	2017-02-02		1657711	5304052	Durvillaea	Sheltered	0.65	1.848	1.1	0.38	1.018
q	Tide gauge	AN	2017-02-02		1657711	5304052	Carpophyllum	Sheltered	0.55	1.848	1.1	0.26	1.038
r	Tide gauge	AN	2017-02-02		1657711	5304052	Durvillaea	Sheltered/exposed	0.7	1.848	1.1	0.38	1.068
s	Tide gauge	AN	2017-02-02	14:05:00	1657711	5304052	Carpophyllum	Sheltered	0.6	1.848	1.1	0.26	1.088
1	Tide Gauge	VM	2017-02-08	20:03:00	1657845	5304112	Durvillaea	Sheltered	1.35	1.284	1.1	0.38	1.154	1.188
2	Tide Gauge	VM	2017-02-08		42°24'47.3"	173°42'10.9"	Durvillaea	Sheltered	1.55	1.284	1.1	0.38	1.354
3	Tide Gauge	VM	2017-02-08		42°24'47.3"	173°42'10.9"	Durvillaea	Sheltered	1.4	1.284	1.1	0.38	1.204
4	Tide Gauge	VM	2017-02-08		42°24'47.3"	173°42'10.9"	Durvillaea	Sheltered	1.35	1.284	1.1	0.38	1.154
5	Tide Gauge	VM	2017-02-08		42°24'47.3"	173°42'10.9"	Durvillaea	Sheltered	1.25	1.284	1.1	0.38	1.054
6	Tide Gauge	VM	2017-02-08		42°24'47.3"	173°42'10.9"	Durvillaea	Sheltered	1.3	1.284	1.1	0.38	1.104
7	Tide Gauge	VM	2017-02-08		42°24'47.3"	173°42'10.9"	Durvillaea	Sheltered	1.45	1.284	1.1	0.38	1.254
8	Tide Gauge	VM	2017-02-08		42°24'47.3"	173°42'10.9"	Durvillaea	Sheltered	1.35	1.284	1.1	0.38	1.154
9	Tide Gauge	VM	2017-02-08		42°24'47.3"	173°42'10.9"	Durvillaea	Sheltered	1.33	1.284	1.1	0.38	1.134
10	Tide Gauge	VM	2017-02-08		42°24'47.3"	173°42'10.9"	Durvillaea	Exposed	1.4	1.284	1.1	0.38	1.204
11	Tide Gauge	VM	2017-02-08		42°24'47.3"	173°42'10.9"	Durvillaea	Exposed	1.3	1.284	1.1	0.38	1.104
12	Tide Gauge	VM	2017-02-08		42°24'47.3"	173°42'10.9"	Durvillaea	Exposed	1.4	1.284	1.1	0.38	1.204
13	Tide Gauge	VM	2017-02-08		42°24'47.3"	173°42'10.9"	Durvillaea	Exposed	1.5	1.284	1.1	0.38	1.304
14	Tide Gauge	VM	2017-02-08		42°24'47.3"	173°42'10.9"	Durvillaea	Exposed	1.4	1.284	1.1	0.38	1.204
15	Tide Gauge	VM	2017-02-08	20:25:00	42°24'47.3"	173°42'10.9"	Durvillaea	Exposed	1.43	1.284	1.1	0.38	1.234
1	Tide Gauge	JB	2017-02-08	20:03:00	1657914	5304122	Carpophyllum	Exposed	1.15	1.284	1.1	0.26	1.074	1.12047
2	Tide Gauge	JB	2017-02-08		1657914	5304122	Carpophyllum	Exposed	1.2	1.284	1.1	0.26	1.124
3	Tide Gauge	JB	2017-02-08		1657914	5304122	Carpophyllum	Exposed	1.25	1.284	1.1	0.26	1.174
4	Tide Gauge	JB	2017-02-08		1657914	5304122	Carpophyllum	Exposed	1.15	1.284	1.1	0.26	1.074
5	Tide Gauge	JB	2017-02-08		1657914	5304122	Carpophyllum	Exposed	1.1	1.284	1.1	0.26	1.024
6	Tide Gauge	JB	2017-02-08		1657914	5304122	Carpophyllum	Exposed	1.2	1.284	1.1	0.26	1.124
7	Tide Gauge	JB	2017-02-08		1657914	5304122	Carpophyllum	Exposed	1.15	1.284	1.1	0.26	1.074
10	Tide Gauge	JB	2017-02-08		1657914	5304122	Carpophyllum	Exposed	1.2	1.284	1.1	0.26	1.124
11	Tide Gauge	JB	2017-02-08		1657914	5304122	Carpophyllum	Exposed	1.1	1.284	1.1	0.26	1.024
12	Tide Gauge	JB	2017-02-08		1657914	5304122	Durvillaea	Exposed	1.55	1.284	1.1	0.38	1.354
13	Tide Gauge	JB	2017-02-08		1657914	5304122	Durvillaea	Exposed	1.5	1.284	1.1	0.38	1.304
14	Tide Gauge	JB	2017-02-08		1657914	5304122	Carpophyllum	Exposed	1.25	1.284	1.1	0.26	1.174
15	Tide Gauge	JB	2017-02-08		1657914	5304122	Carpophyllum	Exposed	1.3	1.284	1.1	0.26	1.224
16	Tide Gauge	JB	2017-02-08		1657914	5304122	Carpophyllum	Sheltered	1	1.284	1.1	0.26	0.924
17	Tide Gauge	JB	2017-02-08		1657914	5304122	Carpophyllum	Exposed	1.1	1.284	1.1	0.26	1.024
18	Tide Gauge	JB	2017-02-08		1657914	5304122	Carpophyllum	Exposed	1.15	1.284	1.1	0.26	1.074
19	Tide Gauge	JB	2017-02-08		1657914	5304122	Durvillaea	Exposed	1.35	1.284	1.1	0.38	1.154

## Sheet: Tide Gauge calib uplift all 
Site	Locality_name	Operator	Date_NZ	Time_NZ	Lat	Long	NZTM_X	NZTM_Y	Elev (m)	Genus	OM	H	UB(TG)	MLWS	XC/D/G	Mean	SD
om1	Omihi Point	CMR	2017-02-01	1248	42°29'29.18319"S	173°31'24.24024"E	1.64301e+06	5.29552e+06	12.275
om2	Omihi Point	CMR	2017-02-01		42°29'29.19622"S	173°31'24.60218"E	1.64302e+06	5.29552e+06	13.228	Carpophyllum	0.953	1.875	1.468	1.1	0.26	1.71309	0.126932
om3	Omihi Point	CMR	2017-02-01		42°29'29.18404"S	173°31'24.59722"E	1.64302e+06	5.29552e+06	13.254	Carpophyllum	0.979	1.875	1.494
om4	Omihi Point	CMR	2017-02-01		42°29'29.22692"S	173°31'24.59464"E	1.64302e+06	5.29552e+06	13.552	Carpophyllum	1.277	1.875	1.792
om5	Omihi Point	CMR	2017-02-01		42°29'29.16137"S	173°31'24.75495"E	1.64302e+06	5.29553e+06	13.476	Carpophyllum	1.201	1.875	1.716
om6	Omihi Point	CMR	2017-02-01		42°29'29.16729"S	173°31'24.78961"E	1.64302e+06	5.29553e+06	13.676	Carpophyllum	1.401	1.875	1.916
om7	Omihi Point	CMR	2017-02-01		42°29'29.15562"S	173°31'24.78304"E	1.64302e+06	5.29553e+06	13.445	Carpophyllum	1.17	1.875	1.685
om8	Omihi Point	CMR	2017-02-01		42°29'29.13221"S	173°31'24.60354"E	1.64302e+06	5.29553e+06	13.323	Carpophyllum	1.048	1.875	1.563
om9	Omihi Point	CMR	2017-02-01		42°29'29.12434"S	173°31'24.59476"E	1.64302e+06	5.29553e+06	13.342	Carpophyllum	1.067	1.875	1.582
om10	Omihi Point	CMR	2017-02-01		42°29'29.25639"S	173°31'23.88938"E	1.643e+06	5.29552e+06	13.467	Carpophyllum	1.192	1.875	1.707
om11	Omihi Point	CMR	2017-02-01		42°29'29.24247"S	173°31'23.87938"E	1.643e+06	5.29552e+06	13.42	Carpophyllum	1.145	1.875	1.66
om12	Omihi Point	CMR	2017-02-01		42°29'29.35343"S	173°31'24.00033"E	1.64301e+06	5.29552e+06	13.781	Carpophyllum	1.506	1.875	2.021
om13	Omihi Point	CMR	2017-02-01		42°29'29.64040"S	173°31'23.26768"E	1.64299e+06	5.29551e+06	13.533	Carpophyllum	1.258	1.875	1.773
om14	Omihi Point	CMR	2017-02-01		42°29'29.89486"S	173°31'22.70969"E	1.64298e+06	5.2955e+06	13.419	Carpophyllum	1.144	1.875	1.659
om15	Omihi Point	CMR	2017-02-01		42°29'29.88290"S	173°31'22.74447"E	1.64298e+06	5.2955e+06	13.448	Carpophyllum	1.173	1.875	1.688
om16	Omihi Point	CMR	2017-02-01		42°29'29.97181"S	173°31'22.89327"E	1.64298e+06	5.2955e+06	13.573	Carpophyllum	1.298	1.875	1.813
om17	Omihi Point	CMR	2017-02-01		42°29'30.00174"S	173°31'22.89120"E	1.64298e+06	5.2955e+06	13.601	Carpophyllum	1.326	1.875	1.841
om18	Omihi Point	CMR	2017-02-01		42°29'30.23474"S	173°31'22.88516"E	1.64298e+06	5.29549e+06	13.424	Carpophyllum	1.149	1.875	1.664
om19	Omihi Point	CMR	2017-02-01		42°29'30.33233"S	173°31'22.91123"E	1.64298e+06	5.29549e+06	13.596	Carpophyllum	1.321	1.875	1.836
om20	Omihi Point	CMR	2017-02-01		42°29'30.91158"S	173°31'24.00935"E	1.64301e+06	5.29547e+06	13.467	Carpophyllum	1.192	1.875	1.707
om21	Omihi Point	CMR	2017-02-01		42°29'30.90445"S	173°31'24.02122"E	1.64301e+06	5.29547e+06	13.46	Carpophyllum	1.185	1.875	1.7
om22	Omihi Point	CMR	2017-02-01		42°29'30.84378"S	173°31'24.16195"E	1.64301e+06	5.29547e+06	13.522	Carpophyllum	1.247	1.875	1.762
om23	Omihi Point	CMR	2017-02-01		42°29'31.15034"S	173°31'24.09066"E	1.64301e+06	5.29546e+06	13.389	Carpophyllum	1.114	1.875	1.629
om24	Omihi Point	CMR	2017-02-01		42°29'31.12389"S	173°31'24.08859"E	1.64301e+06	5.29546e+06	13.485	Carpophyllum	1.21	1.875	1.725
pp1 wl	PaiaPoint	CMR	2017-02-02	17:51:00	42°28'20.28697"S	173°32'12.49418"E	1.64413e+06	5.29764e+06	12.179
pp2	PaiaPoint	CMR	2017-02-02		42°28'20.36633"S	173°32'12.41571"E	1.64412e+06	5.29764e+06	12.95	Carpophyllum	0.771	1.734	1.145	1.1	0.26	1.26495	0.107793
pp3	PaiaPoint	CMR	2017-02-02		42°28'20.37343"S	173°32'12.46000"E	1.64413e+06	5.29764e+06	12.968	Carpophyllum	0.789	1.734	1.163
pp4	PaiaPoint	CMR	2017-02-02		42°28'20.38739"S	173°32'12.52589"E	1.64413e+06	5.29764e+06	13.046	Carpophyllum	0.867	1.734	1.241
pp5	PaiaPoint	CMR	2017-02-02		42°28'20.38722"S	173°32'12.59431"E	1.64413e+06	5.29764e+06	13.076	Carpophyllum	0.897	1.734	1.271
pp6	PaiaPoint	CMR	2017-02-02		42°28'20.38263"S	173°32'12.63768"E	1.64413e+06	5.29764e+06	13.068	Carpophyllum	0.889	1.734	1.263
pp7	PaiaPoint	CMR	2017-02-02		42°28'20.45108"S	173°32'12.63609"E	1.64413e+06	5.29764e+06	13.162	Carpophyllum	0.983	1.734	1.357
pp8	PaiaPoint	CMR	2017-02-02		42°28'20.46157"S	173°32'12.57649"E	1.64413e+06	5.29764e+06	13.313	Carpophyllum	1.134	1.734	1.508
pp9	PaiaPoint	CMR	2017-02-02		42°28'20.50734"S	173°32'12.36564"E	1.64412e+06	5.29764e+06	12.949	Carpophyllum	0.77	1.734	1.144
pp10	PaiaPoint	CMR	2017-02-02		42°28'20.58407"S	173°32'12.44909"E	1.64413e+06	5.29763e+06	12.933	Carpophyllum	0.754	1.734	1.128
pp11	PaiaPoint	CMR	2017-02-02		42°28'20.60212"S	173°32'12.52334"E	1.64413e+06	5.29763e+06	13.02	Carpophyllum	0.841	1.734	1.215
pp12	PaiaPoint	CMR	2017-02-02		42°28'20.62026"S	173°32'12.60603"E	1.64413e+06	5.29763e+06	13.14	Carpophyllum	0.961	1.734	1.335
pp13	PaiaPoint	CMR	2017-02-02		42°28'20.60477"S	173°32'12.64956"E	1.64413e+06	5.29763e+06	13.175	Carpophyllum	0.996	1.734	1.37
pp14	PaiaPoint	CMR	2017-02-02		42°28'20.59655"S	173°32'12.69014"E	1.64413e+06	5.29763e+06	13.147	Carpophyllum	0.968	1.734	1.342
pp15	PaiaPoint	CMR	2017-02-02		42°28'20.73216"S	173°32'12.67475"E	1.64413e+06	5.29763e+06	13.282	Carpophyllum	1.103	1.734	1.477
pp16	PaiaPoint	CMR	2017-02-02		42°28'20.78550"S	173°32'12.51992"E	1.64413e+06	5.29763e+06	13.019	Carpophyllum	0.84	1.734	1.214
pp17	PaiaPoint	CMR	2017-02-02		42°28'20.77027"S	173°32'12.51753"E	1.64413e+06	5.29763e+06	13.047	Carpophyllum	0.868	1.734	1.242
pp18	PaiaPoint	CMR	2017-02-02		42°28'20.71474"S	173°32'12.49497"E	1.64413e+06	5.29763e+06	13.017	Carpophyllum	0.838	1.734	1.212
pp19	PaiaPoint	CMR	2017-02-02		42°28'20.69249"S	173°32'12.48862"E	1.64413e+06	5.29763e+06	13.007	Carpophyllum	0.828	1.734	1.202
pp20	PaiaPoint	CMR	2017-02-02		42°28'20.65314"S	173°32'12.56722"E	1.64413e+06	5.29763e+06	13.01	Carpophyllum	0.831	1.734	1.205
pp21 wl	PaiaPoint	CMR	2017-02-02	17:58:00	42°28'20.60310"S	173°32'12.63929"E	1.64413e+06	5.29763e+06	12.198
pp22	PaiaPoint	CMR	2017-02-02		42°28'20.63562"S	173°32'12.56892"E	1.64413e+06	5.29763e+06	13.15	Durvillaea	0.952	1.785	1.257	1.1	0.38	1.22125	0.183686
pp23	PaiaPoint	CMR	2017-02-02		42°28'20.63127"S	173°32'12.58135"E	1.64413e+06	5.29763e+06	13.136	Durvillaea	0.938	1.785	1.243
pp24	PaiaPoint	CMR	2017-02-02		42°28'20.61930"S	173°32'12.80924"E	1.64413e+06	5.29763e+06	13.021	Durvillaea	0.823	1.785	1.128
pp25	PaiaPoint	CMR	2017-02-02		42°28'20.73253"S	173°32'12.71129"E	1.64413e+06	5.29763e+06	13.391	Durvillaea	1.193	1.785	1.498
pp26	PaiaPoint	CMR	2017-02-02		42°28'20.72518"S	173°32'12.71803"E	1.64413e+06	5.29763e+06	13.361	Durvillaea	1.163	1.785	1.468
pp27	PaiaPoint	CMR	2017-02-02		42°28'20.74646"S	173°32'12.61197"E	1.64413e+06	5.29763e+06	13.165	Durvillaea	0.967	1.785	1.272
pp28	PaiaPoint	CMR	2017-02-02		42°28'20.77309"S	173°32'12.60159"E	1.64413e+06	5.29763e+06	13.361	Durvillaea	1.163	1.785	1.468
pp29	PaiaPoint	CMR	2017-02-02		42°28'20.59981"S	173°32'12.55318"E	1.64413e+06	5.29763e+06	13.184	Durvillaea	0.986	1.785	1.291
pp30	PaiaPoint	CMR	2017-02-02		42°28'20.56513"S	173°32'12.58260"E	1.64413e+06	5.29763e+06	13.291	Durvillaea	1.093	1.785	1.398
pp31	PaiaPoint	CMR	2017-02-02		42°28'20.53066"S	173°32'12.62470"E	1.64413e+06	5.29764e+06	13.247	Durvillaea	1.049	1.785	1.354
pp32	PaiaPoint	CMR	2017-02-02		42°28'20.47333"S	173°32'12.53759"E	1.64413e+06	5.29764e+06	13.251	Durvillaea	1.053	1.785	1.358
pp33	PaiaPoint	CMR	2017-02-02		42°28'20.45981"S	173°32'12.58498"E	1.64413e+06	5.29764e+06	13.304	Durvillaea	1.106	1.785	1.411
pp34	PaiaPoint	CMR	2017-02-02		42°28'20.45794"S	173°32'12.61956"E	1.64413e+06	5.29764e+06	13.098	Durvillaea	0.9	1.785	1.205
pp35	PaiaPoint	CMR	2017-02-02		42°28'20.36479"S	173°32'12.41369"E	1.64412e+06	5.29764e+06	12.89	Durvillaea	0.692	1.785	0.997
pp36	PaiaPoint	CMR	2017-02-02		42°28'20.36703"S	173°32'12.32483"E	1.64412e+06	5.29764e+06	12.897	Durvillaea	0.699	1.785	1.004
pp37	PaiaPoint	CMR	2017-02-02		42°28'20.23980"S	173°32'12.19793"E	1.64412e+06	5.29764e+06	12.952	Durvillaea	0.754	1.785	1.059
pp38	PaiaPoint	CMR	2017-02-02		42°28'20.24483"S	173°32'12.19106"E	1.64412e+06	5.29764e+06	12.908	Durvillaea	0.71	1.785	1.015
pp39	PaiaPoint	CMR	2017-02-02		42°28'20.22543"S	173°32'12.21167"E	1.64412e+06	5.29764e+06	12.962	Durvillaea	0.764	1.785	1.069
pp40	PaiaPoint	CMR	2017-02-02		42°28'20.15316"S	173°32'12.21791"E	1.64412e+06	5.29765e+06	12.866	Durvillaea	0.668	1.785	0.973
pp41	PaiaPoint	CMR	2017-02-02		42°28'20.11555"S	173°32'12.26010"E	1.64412e+06	5.29765e+06	12.85	Durvillaea	0.652	1.785	0.957
pp50 wl	PaiaPoint	CMR	2017-02-02	18:23:00	42°28'17.08469"S	173°32'12.47865"E	1.64413e+06	5.29774e+06	12.357
pp51	PaiaPoint	CMR	2017-02-02		42°28'17.02588"S	173°32'12.46562"E	1.64413e+06	5.29774e+06	12.906	Uncertain	0.549	1.895	1.034	1.1	0.31	1.17453	0.156705
pp52	PaiaPoint	CMR	2017-02-02		42°28'17.01523"S	173°32'12.51033"E	1.64413e+06	5.29774e+06	12.937	Uncertain	0.58	1.895	1.065
pp53	PaiaPoint	CMR	2017-02-02		42°28'17.00788"S	173°32'12.52541"E	1.64413e+06	5.29774e+06	12.912	Uncertain	0.555	1.895	1.04
pp54	PaiaPoint	CMR	2017-02-02		42°28'16.99904"S	173°32'12.53157"E	1.64413e+06	5.29774e+06	12.849	Uncertain	0.492	1.895	0.977
pp55	PaiaPoint	CMR	2017-02-02		42°28'16.99299"S	173°32'12.54639"E	1.64413e+06	5.29774e+06	12.941	Uncertain	0.584	1.895	1.069
pp56	PaiaPoint	CMR	2017-02-02		42°28'17.13625"S	173°32'12.39806"E	1.64413e+06	5.29774e+06	12.823	Uncertain	0.466	1.895	0.951
pp57	PaiaPoint	CMR	2017-02-02		42°28'17.07903"S	173°32'12.31108"E	1.64412e+06	5.29774e+06	13.01	Uncertain	0.653	1.895	1.138
pp58	PaiaPoint	CMR	2017-02-02		42°28'17.06646"S	173°32'12.32604"E	1.64412e+06	5.29774e+06	13.114	Uncertain	0.757	1.895	1.242
pp59	PaiaPoint	CMR	2017-02-02		42°28'17.04687"S	173°32'12.34609"E	1.64412e+06	5.29774e+06	12.972	Uncertain	0.615	1.895	1.1
pp60	PaiaPoint	CMR	2017-02-02		42°28'16.96973"S	173°32'12.41211"E	1.64413e+06	5.29775e+06	12.99	Uncertain	0.633	1.895	1.118
pp61	PaiaPoint	CMR	2017-02-02		42°28'16.98512"S	173°32'12.42906"E	1.64413e+06	5.29774e+06	12.99	Uncertain	0.633	1.895	1.118
pp62	PaiaPoint	CMR	2017-02-02		42°28'16.81749"S	173°32'12.28010"E	1.64412e+06	5.29775e+06	13.169	Uncertain	0.812	1.895	1.297
pp63	PaiaPoint	CMR	2017-02-02		42°28'16.80309"S	173°32'12.29638"E	1.64412e+06	5.29775e+06	13.014	Uncertain	0.657	1.895	1.142
pp64	PaiaPoint	CMR	2017-02-02		42°28'16.58226"S	173°32'12.34478"E	1.64412e+06	5.29776e+06	13.444	Uncertain	1.087	1.895	1.572
pp65	PaiaPoint	CMR	2017-02-02		42°28'16.53004"S	173°32'12.49786"E	1.64413e+06	5.29776e+06	13.261	Uncertain	0.904	1.895	1.389
pp66	PaiaPoint	CMR	2017-02-02		42°28'16.48118"S	173°32'12.49935"E	1.64413e+06	5.29776e+06	13.258	Uncertain	0.901	1.895	1.386
pp67	PaiaPoint	CMR	2017-02-02		42°28'16.45121"S	173°32'12.51435"E	1.64413e+06	5.29776e+06	13.099	Uncertain	0.742	1.895	1.227
pp68	PaiaPoint	CMR	2017-02-02		42°28'16.49112"S	173°32'12.56814"E	1.64413e+06	5.29776e+06	13.125	Uncertain	0.768	1.895	1.253
pp69	PaiaPoint	CMR	2017-02-02		42°28'16.46977"S	173°32'12.56678"E	1.64413e+06	5.29776e+06	13.07	Uncertain	0.713	1.895	1.198
tgs1 wl	Tide Gauge	CMR	2017-02-02	1336	42°24'50.05114"S	173°42'03.58814"E	5.30403e+06	1.65768e+06	11.645	Water level
tgs2	Tide Gauge	CMR	2017-02-02		42°24'50.02101"S	173°42'03.69656"E	5.30403e+06	1.65768e+06	11.994	Carpophyllum	0.349	1.909	0.898	1.1	0.26	0.9871	0.0673669
tgs3	Tide Gauge	CMR	2017-02-02		42°24'49.99298"S	173°42'03.67108"E	5.30403e+06	1.65768e+06	12.055	Carpophyllum	0.41	1.909	0.959
tgs4	Tide Gauge	CMR	2017-02-02		42°24'50.35321"S	173°42'03.01428"E	5.30402e+06	1.65766e+06	12.11	Carpophyllum	0.465	1.909	1.014
tgs5	Tide Gauge	CMR	2017-02-02		42°24'50.18404"S	173°42'02.91636"E	5.30402e+06	1.65766e+06	12.089	Carpophyllum	0.444	1.909	0.993
tgs6	Tide Gauge	CMR	2017-02-02		42°24'50.22232"S	173°42'02.94027"E	5.30402e+06	1.65766e+06	12.095	Carpophyllum	0.45	1.909	0.999
tgs7	Tide Gauge	CMR	2017-02-02		42°24'50.14139"S	173°42'02.84281"E	5.30403e+06	1.65766e+06	12.126	Carpophyllum	0.481	1.909	1.03
tgs8	Tide Gauge	CMR	2017-02-02		42°24'50.10497"S	173°42'02.78659"E	5.30403e+06	1.65766e+06	12.114	Carpophyllum	0.469	1.909	1.018
tgs9	Tide Gauge	CMR	2017-02-02		42°24'50.07976"S	173°42'02.77064"E	5.30403e+06	1.65766e+06	12.103	Carpophyllum	0.458	1.909	1.007
tgs10	Tide Gauge	CMR	2017-02-02		42°24'50.08189"S	173°42'02.75692"E	5.30403e+06	1.65766e+06	12.099	Carpophyllum	0.454	1.909	1.003
tgs11	Tide Gauge	CMR	2017-02-02		42°24'50.17821"S	173°42'02.78452"E	5.30403e+06	1.65766e+06	12.051	Carpophyllum	0.406	1.909	0.955
tgs12	Tide Gauge	CMR	2017-02-02		42°24'50.12649"S	173°42'02.64820"E	5.30403e+06	1.65766e+06	12.085	Carpophyllum	0.44	1.909	0.989
tgs13	Tide Gauge	CMR	2017-02-02		42°24'50.15267"S	173°42'02.43598"E	5.30403e+06	1.65765e+06	12.041	Carpophyllum	0.396	1.909	0.945
tgs14	Tide Gauge	CMR	2017-02-02		42°24'50.14143"S	173°42'02.39129"E	5.30403e+06	1.65765e+06	12.03	Carpophyllum	0.385	1.909	0.934
tgs15	Tide Gauge	CMR	2017-02-02		42°24'50.10912"S	173°42'02.36170"E	5.30403e+06	1.65765e+06	12.033	Carpophyllum	0.388	1.909	0.937
tgs16	Tide Gauge	CMR	2017-02-02		42°24'50.01634"S	173°42'02.37072"E	5.30403e+06	1.65765e+06	12.022	Carpophyllum	0.377	1.909	0.926
tgs17	Tide Gauge	CMR	2017-02-02		42°24'50.00160"S	173°42'02.38538"E	5.30403e+06	1.65765e+06	11.945	Carpophyllum	0.3	1.909	0.849
tgs18	Tide Gauge	CMR	2017-02-02		42°24'49.95966"S	173°42'02.37559"E	5.30403e+06	1.65765e+06	12.22	Carpophyllum	0.575	1.909	1.124
tgs19	Tide Gauge	CMR	2017-02-02		42°24'49.93057"S	173°42'02.33742"E	5.30403e+06	1.65765e+06	12.229	Carpophyllum	0.584	1.909	1.133
tgs20	Tide Gauge	CMR	2017-02-02		42°24'49.92338"S	173°42'02.39175"E	5.30403e+06	1.65765e+06	12.129	Carpophyllum	0.484	1.909	1.033
tgs21	Tide Gauge	CMR	2017-02-02		42°24'50.02899"S	173°42'02.33936"E	5.30403e+06	1.65765e+06	12.092	Carpophyllum	0.447	1.909	0.996
tgx1 wl	Tide Gauge	CMR	2017-02-02	1357	42°24'48.43037"S	173°42'10.74145"E	5.30408e+06	1.65784e+06	11.529	Water level
tgx2	Tide Gauge	CMR	2017-02-02		42°24'48.43328"S	173°42'10.67832"E	5.30408e+06	1.65784e+06	12.024	Carpophyllum	0.495	1.812	0.947	1.1	0.26	0.923211	0.102521
tgx3	Tide Gauge	CMR	2017-02-02		42°24'48.42379"S	173°42'10.72436"E	5.30408e+06	1.65784e+06	11.914	Carpophyllum	0.385	1.812	0.837
tgx4	Tide Gauge	CMR	2017-02-02		42°24'48.41253"S	173°42'10.76498"E	5.30408e+06	1.65784e+06	11.937	Carpophyllum	0.408	1.812	0.86
tgx5	Tide Gauge	CMR	2017-02-02		42°24'48.40120"S	173°42'10.76874"E	5.30408e+06	1.65784e+06	11.903	Carpophyllum	0.374	1.812	0.826
tgx6	Tide Gauge	CMR	2017-02-02		42°24'48.39772"S	173°42'10.80610"E	5.30408e+06	1.65784e+06	11.784	Carpophyllum	0.255	1.812	0.707
tgx7	Tide Gauge	CMR	2017-02-02		42°24'48.34468"S	173°42'10.88316"E	5.30408e+06	1.65784e+06	12.06	Carpophyllum	0.531	1.812	0.983
tgx8	Tide Gauge	CMR	2017-02-02		42°24'48.25743"S	173°42'10.99546"E	5.30408e+06	1.65785e+06	11.937	Carpophyllum	0.408	1.812	0.86
tgx9	Tide Gauge	CMR	2017-02-02		42°24'48.26209"S	173°42'11.07538"E	5.30408e+06	1.65785e+06	12.029	Carpophyllum	0.5	1.812	0.952
tgx10	Tide Gauge	CMR	2017-02-02		42°24'48.11885"S	173°42'11.15650"E	5.30409e+06	1.65785e+06	11.989	Carpophyllum	0.46	1.812	0.912
tgx11	Tide Gauge	CMR	2017-02-02		42°24'48.15587"S	173°42'11.26272"E	5.30409e+06	1.65785e+06	12.098	Carpophyllum	0.569	1.812	1.021
tgx12	Tide Gauge	CMR	2017-02-02		42°24'48.18854"S	173°42'11.23507"E	5.30408e+06	1.65785e+06	12.088	Carpophyllum	0.559	1.812	1.011
tgx13	Tide Gauge	CMR	2017-02-02		42°24'48.08127"S	173°42'11.41004"E	5.30409e+06	1.65786e+06	12.198	Carpophyllum	0.669	1.812	1.121
tgx14	Tide Gauge	CMR	2017-02-02		42°24'48.06757"S	173°42'11.44642"E	5.30409e+06	1.65786e+06	12.129	Carpophyllum	0.6	1.812	1.052
tgx15	Tide Gauge	CMR	2017-02-02		42°24'48.04190"S	173°42'11.43489"E	5.30409e+06	1.65786e+06	12.132	Carpophyllum	0.603	1.812	1.055
tgx16	Tide Gauge	CMR	2017-02-02		42°24'48.00063"S	173°42'11.38446"E	5.30409e+06	1.65786e+06	11.999	Carpophyllum	0.47	1.812	0.922
tgx17	Tide Gauge	CMR	2017-02-02		42°24'47.90701"S	173°42'11.41247"E	5.30409e+06	1.65786e+06	11.952	Carpophyllum	0.423	1.812	0.875
tgx18	Tide Gauge	CMR	2017-02-02		42°24'47.90545"S	173°42'11.62335"E	5.30409e+06	1.65786e+06	12.025	Carpophyllum	0.496	1.812	0.948
tgx19	Tide Gauge	CMR	2017-02-02		42°24'47.57642"S	173°42'11.55339"E	5.3041e+06	1.65786e+06	11.891	Carpophyllum	0.362	1.812	0.814
tgx20	Tide Gauge	CMR	2017-02-02		42°24'47.61696"S	173°42'11.59082"E	5.3041e+06	1.65786e+06	11.915	Carpophyllum	0.386	1.812	0.838
water1	Tide Gauge	SKK	2017-02-08	2000	42°24'47.87287"S	173°42'08.81881"E	5.3041e+06	1.6578e+06	11.106	Water level
water2	Tide Gauge	SKK	2017-02-08		42°24'47.86213"S	173°42'08.80030"E	5.3041e+06	1.6578e+06	11.11	Water level
water3	Tide Gauge	SKK	2017-02-08		42°24'47.84738"S	173°42'08.79427"E	5.3041e+06	1.6578e+06	11.056	Water level
		SKK							11.0907
tg d s 1	Tide Gauge	SKK	2017-02-08		42°24'47.89233"S	173°42'08.72824"E	5.30409e+06	1.6578e+06	12.298	Durvillaea	1.20733	1.32	1.04733	1.1	0.38	0.980552	0.0733141
tg d s 2	Tide Gauge	SKK	2017-02-08		42°24'47.95738"S	173°42'08.77185"E	5.30409e+06	1.6578e+06	12.194	Durvillaea	1.10333	1.32	0.943333
tg d s 3	Tide Gauge	SKK	2017-02-08		42°24'47.97073"S	173°42'08.85551"E	5.30409e+06	1.6578e+06	12.035	Durvillaea	0.944333	1.32	0.784333
tg d s 4	Tide Gauge	SKK	2017-02-08		42°24'47.95993"S	173°42'08.97717"E	5.30409e+06	1.6578e+06	12.291	Durvillaea	1.20033	1.32	1.04033
tg d s 5	Tide Gauge	SKK	2017-02-08		42°24'48.14793"S	173°42'08.71966"E	5.30409e+06	1.6578e+06	12.254	Durvillaea	1.16333	1.32	1.00333
tg d s 6	Tide Gauge	SKK	2017-02-08		42°24'48.14867"S	173°42'08.73680"E	5.30409e+06	1.6578e+06	12.243	Durvillaea	1.15233	1.32	0.992333
tg d s 7	Tide Gauge	SKK	2017-02-08		42°24'48.14867"S	173°42'08.69661"E	5.30409e+06	1.65779e+06	12.306	Durvillaea	1.21533	1.32	1.05533
tg d s 8	Tide Gauge	SKK	2017-02-08		42°24'48.11678"S	173°42'08.72659"E	5.30409e+06	1.6578e+06	12.167	Durvillaea	1.07633	1.32	0.916333
tg d s 9	Tide Gauge	SKK	2017-02-08		42°24'48.10302"S	173°42'08.70339"E	5.30409e+06	1.65779e+06	12.24	Durvillaea	1.14933	1.32	0.989333
tg d s 10	Tide Gauge	SKK	2017-02-08		42°24'48.09626"S	173°42'08.62200"E	5.30409e+06	1.65779e+06	12.208	Durvillaea	1.11733	1.32	0.957333
tg d s 11	Tide Gauge	SKK	2017-02-08		42°24'48.08959"S	173°42'08.61405"E	5.30409e+06	1.65779e+06	12.207	Durvillaea	1.11633	1.32	0.956333
tg d s 12	Tide Gauge	SKK	2017-02-08		42°24'47.75998"S	173°42'08.82198"E	5.3041e+06	1.6578e+06	12.039	Durvillaea	0.948333	1.32	0.788333
tg d s 13	Tide Gauge	SKK	2017-02-08		42°24'47.77245"S	173°42'08.84654"E	5.3041e+06	1.6578e+06	12.254	Durvillaea	1.16333	1.32	1.00333
tg d s 14	Tide Gauge	SKK	2017-02-08		42°24'47.78151"S	173°42'08.84975"E	5.3041e+06	1.6578e+06	12.219	Durvillaea	1.12833	1.32	0.968333
tg d_2 s 1	Tide Gauge	SKK	2017-02-08		42°24'47.19920"S	173°42'10.57454"E	5.30412e+06	1.65784e+06	12.317	Durvillaea	1.22633	1.32	1.06633
tg d_2 s 2	Tide Gauge	SKK	2017-02-08		42°24'47.22512"S	173°42'10.54941"E	5.30411e+06	1.65784e+06	12.299	Durvillaea	1.20833	1.32	1.04833
tg d_2 s 3	Tide Gauge	SKK	2017-02-08		42°24'47.24896"S	173°42'10.60279"E	5.30411e+06	1.65784e+06	12.254	Durvillaea	1.16333	1.32	1.00333
tg d_2 s 4	Tide Gauge	SKK	2017-02-08		42°24'47.26126"S	173°42'10.65841"E	5.30411e+06	1.65784e+06	12.292	Durvillaea	1.20133	1.32	1.04133
tg d_2 s 5	Tide Gauge	SKK	2017-02-08		42°24'47.25970"S	173°42'10.73518"E	5.30411e+06	1.65784e+06	12.266	Durvillaea	1.17533	1.32	1.01533
tg d_2 s 6	Tide Gauge	SKK	2017-02-08		42°24'47.33051"S	173°42'10.82470"E	5.30411e+06	1.65784e+06	12.241	Durvillaea	1.15033	1.32	0.990333
tg d_2 s 7	Tide Gauge	SKK	2017-02-08		42°24'47.34152"S	173°42'10.90780"E	5.30411e+06	1.65785e+06	12.248	Durvillaea	1.15733	1.32	0.997333
tg d_2 s 8	Tide Gauge	SKK	2017-02-08		42°24'47.24684"S	173°42'10.90147"E	5.30411e+06	1.65785e+06	12.205	Durvillaea	1.11433	1.32	0.954333
tg d_2 s 9	Tide Gauge	SKK	2017-02-08		42°24'47.03259"S	173°42'11.38869"E	5.30412e+06	1.65786e+06	12.27	Durvillaea	1.17933	1.32	1.01933
tg d_2 s 10	Tide Gauge	SKK	2017-02-08		42°24'46.94568"S	173°42'11.51735"E	5.30412e+06	1.65786e+06	12.212	Durvillaea	1.12133	1.32	0.961333
tg d_2 s 11	Tide Gauge	SKK	2017-02-08		42°24'46.94020"S	173°42'11.54896"E	5.30412e+06	1.65786e+06	12.229	Durvillaea	1.13833	1.32	0.978333
tg d_2 s 12	Tide Gauge	SKK	2017-02-08		42°24'46.93592"S	173°42'11.40365"E	5.30412e+06	1.65786e+06	12.22	Durvillaea	1.12933	1.32	0.969333
tg d_2 s 13	Tide Gauge	SKK	2017-02-08		42°24'46.88086"S	173°42'11.38486"E	5.30413e+06	1.65786e+06	12.2	Durvillaea	1.10933	1.32	0.949333
tg d_2 s 14	Tide Gauge	SKK	2017-02-08		42°24'46.85913"S	173°42'11.46816"E	5.30413e+06	1.65786e+06	12.08	Durvillaea	0.989333	1.32	0.829333
tg d_2 s 15	Tide Gauge	SKK	2017-02-08		42°24'46.80921"S	173°42'11.41509"E	5.30413e+06	1.65786e+06	12.181	Durvillaea	1.09033	1.32	0.930333
tg d_2 s 16	Tide Gauge	SKK	2017-02-08	2019	42°24'46.73815"S	173°42'11.45995"E	5.30413e+06	1.65786e+06	12.259	Durvillaea	1.16833	1.32	1.00833
tg d_3 d s	Tide Gauge	SKK	2017-02-08		42°24'44.62654"S	173°42'14.06038"E	5.30419e+06	1.65792e+06	12.345	Durvillaea	1.25433	1.32	1.09433
tg d_3 d t	Tide Gauge	SKK	2017-02-08		42°24'44.57407"S	173°42'14.02823"E	5.3042e+06	1.65792e+06	12.326	Durvillaea	1.23533	1.32	1.07533
water mean			2017-02-09	7.25pm	42°25'35.53563"S	173°40'53.19356"E	5.30264e+06	1.65606e+06	11.66
c s 1	South Bay Harbour	SKK	2017-02-09		42°25'35.77107"S	173°40'53.24325"E	5.30263e+06	1.65606e+06	11.639	Carpophyllum	-0.021	1.947	0.566	1.1	0.26	0.74385	0.119073
c s 2	South Bay Harbour	SKK	2017-02-09		42°25'35.72975"S	173°40'53.18802"E	5.30263e+06	1.65606e+06	11.664	Carpophyllum	0.004	1.947	0.591
c s 3	South Bay Harbour	SKK	2017-02-09		42°25'35.70398"S	173°40'53.22179"E	5.30263e+06	1.65606e+06	11.688	Carpophyllum	0.028	1.947	0.615
c s 4	South Bay Harbour	SKK	2017-02-09		42°25'35.69901"S	173°40'53.47300"E	5.30263e+06	1.65606e+06	11.718	Carpophyllum	0.058	1.947	0.645
c s 5	South Bay Harbour	SKK	2017-02-09		42°25'35.75539"S	173°40'53.44026"E	5.30263e+06	1.65606e+06	11.619	Carpophyllum	-0.041	1.947	0.546
c s 6	South Bay Harbour	SKK	2017-02-09		42°25'34.77766"S	173°40'51.86856"E	5.30266e+06	1.65603e+06	11.69	Carpophyllum	0.03	1.947	0.617
c s 7	South Bay Harbour	SKK	2017-02-09		42°25'34.82028"S	173°40'51.84031"E	5.30266e+06	1.65603e+06	11.707	Carpophyllum	0.047	1.947	0.634
c s 8	South Bay Harbour	SKK	2017-02-09		42°25'34.63711"S	173°40'51.69439"E	5.30267e+06	1.65602e+06	11.872	Carpophyllum	0.212	1.947	0.799
c s 9	South Bay Harbour	SKK	2017-02-09		42°25'34.68735"S	173°40'51.61797"E	5.30267e+06	1.65602e+06	11.899	Carpophyllum	0.239	1.947	0.826
c s 10	South Bay Harbour	SKK	2017-02-09		42°25'34.67723"S	173°40'51.60943"E	5.30267e+06	1.65602e+06	11.881	Carpophyllum	0.221	1.947	0.808
c s 11	South Bay Harbour	SKK	2017-02-09		42°25'34.45984"S	173°40'51.31573"E	5.30267e+06	1.65601e+06	11.833	Carpophyllum	0.173	1.947	0.76
c s 12	South Bay Harbour	SKK	2017-02-09		42°25'34.44999"S	173°40'51.36277"E	5.30267e+06	1.65602e+06	11.851	Carpophyllum	0.191	1.947	0.778
c s 13	South Bay Harbour	SKK	2017-02-09		42°25'34.52408"S	173°40'51.26707"E	5.30267e+06	1.65601e+06	11.842	Carpophyllum	0.182	1.947	0.769
c s 14	South Bay Harbour	SKK	2017-02-09		42°25'34.56893"S	173°40'51.15984"E	5.30267e+06	1.65601e+06	11.854	Carpophyllum	0.194	1.947	0.781
c s 15	South Bay Harbour	SKK	2017-02-09		42°25'34.53312"S	173°40'51.15360"E	5.30267e+06	1.65601e+06	11.883	Carpophyllum	0.223	1.947	0.81
c s 16	South Bay Harbour	SKK	2017-02-09		42°25'34.56773"S	173°40'51.12637"E	5.30267e+06	1.65601e+06	11.906	Carpophyllum	0.246	1.947	0.833
c s 17	South Bay Harbour	SKK	2017-02-09		42°25'34.50206"S	173°40'50.90903"E	5.30267e+06	1.65601e+06	12.058	Carpophyllum	0.398	1.947	0.985
c s 18	South Bay Harbour	SKK	2017-02-09		42°25'34.49905"S	173°40'50.95157"E	5.30267e+06	1.65601e+06	11.975	Carpophyllum	0.315	1.947	0.902
c s 19	South Bay Harbour	SKK	2017-02-09		42°25'34.51594"S	173°40'50.83345"E	5.30267e+06	1.656e+06	11.87	Carpophyllum	0.21	1.947	0.797
c s 20	South Bay Harbour	SKK	2017-02-09	7.39pm	42°25'34.45344"S	173°40'50.52825"E	5.30267e+06	1.656e+06	11.888	Carpophyllum	0.228	1.947	0.815

## Sheet: NIWA chart uplift all sites
Site	Locality_name	Operator	Date_NZ	Time_NZ	NZTM_X	NZTM_Y	Elev (m)	Genus	OM	H	UB(TG)	XC/D/G	Mean	SD
om1	Omihi Point	CMR	2017-02-01	1248	5.29552e+06	1.64301e+06	12.275	waterline
om2	Omihi Point	CMR	2017-02-01		5.29552e+06	1.64302e+06	13.228	Carpophyllum	0.953	0.697	1.55	0.1	1.79509	0.126932
om3	Omihi Point	CMR	2017-02-01		5.29552e+06	1.64302e+06	13.254	Carpophyllum	0.979	0.697	1.576
om4	Omihi Point	CMR	2017-02-01		5.29552e+06	1.64302e+06	13.552	Carpophyllum	1.277	0.697	1.874
om5	Omihi Point	CMR	2017-02-01		5.29553e+06	1.64302e+06	13.476	Carpophyllum	1.201	0.697	1.798
om6	Omihi Point	CMR	2017-02-01		5.29553e+06	1.64302e+06	13.676	Carpophyllum	1.401	0.697	1.998
om7	Omihi Point	CMR	2017-02-01		5.29553e+06	1.64302e+06	13.445	Carpophyllum	1.17	0.697	1.767				hours	minutes	t decimal		(t - t1)/(t2 - t1)	plus 1	x Pi = A
om8	Omihi Point	CMR	2017-02-01		5.29553e+06	1.64302e+06	13.323	Carpophyllum	1.048	0.697	1.645				8	46	8.76667	T1	0.640212	1.64021	5.15288
om9	Omihi Point	CMR	2017-02-01		5.29553e+06	1.64302e+06	13.342	Carpophyllum	1.067	0.697	1.664				15	4	15.0667	T2
om10	Omihi Point	CMR	2017-02-01		5.29552e+06	1.643e+06	13.467	Carpophyllum	1.192	0.697	1.789				12	48	12.8	T
om11	Omihi Point	CMR	2017-02-01		5.29552e+06	1.643e+06	13.42	Carpophyllum	1.145	0.697	1.742
om12	Omihi Point	CMR	2017-02-01		5.29552e+06	1.64301e+06	13.781	Carpophyllum	1.506	0.697	2.103
om13	Omihi Point	CMR	2017-02-01		5.29551e+06	1.64299e+06	13.533	Carpophyllum	1.258	0.697	1.855
om14	Omihi Point	CMR	2017-02-01		5.2955e+06	1.64298e+06	13.419	Carpophyllum	1.144	0.697	1.741								Equation 4
om15	Omihi Point	CMR	2017-02-01		5.2955e+06	1.64298e+06	13.448	Carpophyllum	1.173	0.697	1.77				H1	H2	H		HNIWA = h1+(h2-h1)[(cosA+1)/2]
om16	Omihi Point	CMR	2017-02-01		5.2955e+06	1.64298e+06	13.573	Carpophyllum	1.298	0.697	1.895				1.71	0.29	0.69727
om17	Omihi Point	CMR	2017-02-01		5.2955e+06	1.64298e+06	13.601	Carpophyllum	1.326	0.697	1.923
om18	Omihi Point	CMR	2017-02-01		5.29549e+06	1.64298e+06	13.424	Carpophyllum	1.149	0.697	1.746
om19	Omihi Point	CMR	2017-02-01		5.29549e+06	1.64298e+06	13.596	Carpophyllum	1.321	0.697	1.918
om20	Omihi Point	CMR	2017-02-01		5.29547e+06	1.64301e+06	13.467	Carpophyllum	1.192	0.697	1.789
om21	Omihi Point	CMR	2017-02-01		5.29547e+06	1.64301e+06	13.46	Carpophyllum	1.185	0.697	1.782
om22	Omihi Point	CMR	2017-02-01		5.29547e+06	1.64301e+06	13.522	Carpophyllum	1.247	0.697	1.844
om23	Omihi Point	CMR	2017-02-01		5.29546e+06	1.64301e+06	13.389	Carpophyllum	1.114	0.697	1.711
om24	Omihi Point	CMR	2017-02-01		5.29546e+06	1.64301e+06	13.485	Carpophyllum	1.21	0.697	1.807
pp1	Paia Point	CMR	2017-02-02	1751	5.29764e+06	1.64413e+06	12.179	waterline
pp2	Paia Point	CMR	2017-02-02		5.29764e+06	1.64412e+06	12.95	Carpophyllum	0.771	0.571	1.242	0.1	1.36211	0.107755
pp3	Paia Point	CMR	2017-02-02		5.29764e+06	1.64413e+06	12.968	Carpophyllum	0.789	0.571	1.26
pp4	Paia Point	CMR	2017-02-02		5.29764e+06	1.64413e+06	13.046	Carpophyllum	0.867	0.571	1.338
pp5	Paia Point	CMR	2017-02-02		5.29764e+06	1.64413e+06	13.076	Carpophyllum	0.897	0.571	1.368
pp6	Paia Point	CMR	2017-02-02		5.29764e+06	1.64413e+06	13.069	Carpophyllum	0.89	0.571	1.361
pp7	Paia Point	CMR	2017-02-02		5.29764e+06	1.64413e+06	13.162	Carpophyllum	0.983	0.571	1.454				hours	minutes	t decimal		(t - t1)/(t2 - t1)	1	x Pi = A
pp8	Paia Point	CMR	2017-02-02		5.29764e+06	1.64413e+06	13.313	Carpophyllum	1.134	0.571	1.605				15	55	15.9167	T1	0.314363	1.31436	4.12919
pp9	Paia Point	CMR	2017-02-02		5.29764e+06	1.64412e+06	12.949	Carpophyllum	0.77	0.571	1.241				22	4	22.0667	T2
pp10	Paia Point	CMR	2017-02-02		5.29763e+06	1.64413e+06	12.933	Carpophyllum	0.754	0.571	1.225				17	51	17.85	T
pp11	Paia Point	CMR	2017-02-02		5.29763e+06	1.64413e+06	13.021	Carpophyllum	0.842	0.571	1.313
pp12	Paia Point	CMR	2017-02-02		5.29763e+06	1.64413e+06	13.14	Carpophyllum	0.961	0.571	1.432
pp13	Paia Point	CMR	2017-02-02		5.29763e+06	1.64413e+06	13.175	Carpophyllum	0.996	0.571	1.467
pp14	Paia Point	CMR	2017-02-02		5.29763e+06	1.64413e+06	13.147	Carpophyllum	0.968	0.571	1.439
pp15	Paia Point	CMR	2017-02-02		5.29763e+06	1.64413e+06	13.282	Carpophyllum	1.103	0.571	1.574				H1	H2	H		Equation 4
pp16	Paia Point	CMR	2017-02-02		5.29763e+06	1.64413e+06	13.019	Carpophyllum	0.84	0.571	1.311				0.27	1.61	0.571035		HNIWA = h1+(h2-h1)[(cosA+1)/2]
pp17	Paia Point	CMR	2017-02-02		5.29763e+06	1.64413e+06	13.048	Carpophyllum	0.869	0.571	1.34
pp18	Paia Point	CMR	2017-02-02		5.29763e+06	1.64413e+06	13.017	Carpophyllum	0.838	0.571	1.309
pp19	Paia Point	CMR	2017-02-02		5.29763e+06	1.64413e+06	13.007	Carpophyllum	0.828	0.571	1.299
pp20	Paia Point	CMR	2017-02-02		5.29763e+06	1.64413e+06	13.01	Carpophyllum	0.831	0.571	1.302
pp21	Paia Point	CMR	2017-02-02	1758	5.29763e+06	1.64413e+06	12.198	waterline
pp22	Paia Point	CMR	2017-02-02		5.29763e+06	1.64413e+06	13.15	Durvillaea	0.952	0.605	1.307	0.25	1.2713	0.18361	hours	minutes	t decimal		(t - t1)/(t2 - t1)	1	x Pi = A
pp23	Paia Point	CMR	2017-02-02		5.29763e+06	1.64413e+06	13.136	Durvillaea	0.938	0.605	1.293				15	55	15.9167	T1	0.333333	1.33333	4.18879
pp24	Paia Point	CMR	2017-02-02		5.29763e+06	1.64413e+06	13.021	Durvillaea	0.823	0.605	1.178				22	4	22.0667	T2
pp25	Paia Point	CMR	2017-02-02		5.29763e+06	1.64413e+06	13.391	Durvillaea	1.193	0.605	1.548				17	58	17.9667	T
pp26	Paia Point	CMR	2017-02-02		5.29763e+06	1.64413e+06	13.361	Durvillaea	1.163	0.605	1.518
pp27	Paia Point	CMR	2017-02-02		5.29763e+06	1.64413e+06	13.165	Durvillaea	0.967	0.605	1.322
pp28	Paia Point	CMR	2017-02-02		5.29763e+06	1.64413e+06	13.361	Durvillaea	1.163	0.605	1.518
pp29	Paia Point	CMR	2017-02-02		5.29763e+06	1.64413e+06	13.184	Durvillaea	0.986	0.605	1.341
pp30	Paia Point	CMR	2017-02-02		5.29763e+06	1.64413e+06	13.291	Durvillaea	1.093	0.605	1.448				H1	H2	H		Equation 4
pp31	Paia Point	CMR	2017-02-02		5.29764e+06	1.64413e+06	13.247	Durvillaea	1.049	0.605	1.404				0.27	1.61	0.605		HNIWA = h1+(h2-h1)[(cosA+1)/2]
pp32	Paia Point	CMR	2017-02-02		5.29764e+06	1.64413e+06	13.251	Durvillaea	1.053	0.605	1.408
pp33	Paia Point	CMR	2017-02-02		5.29764e+06	1.64413e+06	13.304	Durvillaea	1.106	0.605	1.461
pp34	Paia Point	CMR	2017-02-02		5.29764e+06	1.64413e+06	13.098	Durvillaea	0.9	0.605	1.255
pp35	Paia Point	CMR	2017-02-02		5.29764e+06	1.64412e+06	12.89	Durvillaea	0.692	0.605	1.047
pp36	Paia Point	CMR	2017-02-02		5.29764e+06	1.64412e+06	12.897	Durvillaea	0.699	0.605	1.054
pp37	Paia Point	CMR	2017-02-02		5.29764e+06	1.64412e+06	12.952	Durvillaea	0.754	0.605	1.109
pp38	Paia Point	CMR	2017-02-02		5.29764e+06	1.64412e+06	12.908	Durvillaea	0.71	0.605	1.065
pp39	Paia Point	CMR	2017-02-02		5.29764e+06	1.64412e+06	12.962	Durvillaea	0.764	0.605	1.119
pp40	Paia Point	CMR	2017-02-02		5.29765e+06	1.64412e+06	12.866	Durvillaea	0.668	0.605	1.023
pp41	Paia Point	CMR	2017-02-02		5.29765e+06	1.64412e+06	12.851	Durvillaea	0.653	0.605	1.008
pp50	Paia Point	CMR	2017-02-02	1822	5.29774e+06	1.64413e+06	12.357	waterline
pp51	Paia Point	CMR	2017-02-02		5.29774e+06	1.64413e+06	12.906	uncertain	0.549	0.7297	1.0287	0.25	1.16933	0.156655	hours	minutes	t decimal		(t - t1)/(t2 - t1)	1	x Pi = A
pp52	Paia Point	CMR	2017-02-02		5.29774e+06	1.64413e+06	12.937	uncertain	0.58	0.7297	1.0597				15	55	15.9167	T1	0.398374	1.39837	4.39312
pp53	Paia Point	CMR	2017-02-02		5.29774e+06	1.64413e+06	12.912	uncertain	0.555	0.7297	1.0347				22	4	22.0667	T2
pp54	Paia Point	CMR	2017-02-02		5.29774e+06	1.64413e+06	12.849	uncertain	0.492	0.7297	0.9717				18	22	18.3667	T
pp55	Paia Point	CMR	2017-02-02		5.29774e+06	1.64413e+06	12.942	uncertain	0.585	0.7297	1.0647
pp56	Paia Point	CMR	2017-02-02		5.29774e+06	1.64413e+06	12.823	uncertain	0.466	0.7297	0.9457
pp57	Paia Point	CMR	2017-02-02		5.29774e+06	1.64412e+06	13.011	uncertain	0.654	0.7297	1.1337
pp58	Paia Point	CMR	2017-02-02		5.29774e+06	1.64412e+06	13.114	uncertain	0.757	0.7297	1.2367
pp59	Paia Point	CMR	2017-02-02		5.29774e+06	1.64412e+06	12.972	uncertain	0.615	0.7297	1.0947				H1	H2	H		Equation 4
pp60	Paia Point	CMR	2017-02-02		5.29775e+06	1.64413e+06	12.99	uncertain	0.633	0.7297	1.1127				0.27	1.61	0.729706		HNIWA = h1+(h2-h1)[(cosA+1)/2]
pp61	Paia Point	CMR	2017-02-02		5.29774e+06	1.64413e+06	12.99	uncertain	0.633	0.7297	1.1127
pp62	Paia Point	CMR	2017-02-02		5.29775e+06	1.64412e+06	13.169	uncertain	0.812	0.7297	1.2917
pp63	Paia Point	CMR	2017-02-02		5.29775e+06	1.64412e+06	13.014	uncertain	0.657	0.7297	1.1367
pp64	Paia Point	CMR	2017-02-02		5.29776e+06	1.64412e+06	13.444	uncertain	1.087	0.7297	1.5667
pp65	Paia Point	CMR	2017-02-02		5.29776e+06	1.64413e+06	13.261	uncertain	0.904	0.7297	1.3837
pp66	Paia Point	CMR	2017-02-02		5.29776e+06	1.64413e+06	13.258	uncertain	0.901	0.7297	1.3807
pp67	Paia Point	CMR	2017-02-02		5.29776e+06	1.64413e+06	13.099	uncertain	0.742	0.7297	1.2217
pp68	Paia Point	CMR	2017-02-02		5.29776e+06	1.64413e+06	13.125	uncertain	0.768	0.7297	1.2477
pp69	Paia Point	CMR	2017-02-02		5.29776e+06	1.64413e+06	13.07	uncertain	0.713	0.7297	1.1927
tgs1	Tide gauge	CMR	2017-02-02	1335	5.30403e+06	1.65768e+06	11.645	waterline
tgs2	Tide gauge	CMR	2017-02-02		5.30403e+06	1.65768e+06	11.994	Carpophyllum	0.349	0.7073	0.9563	0.1	1.03783	0.0595906
tgs3	Tide gauge	CMR	2017-02-02		5.30403e+06	1.65768e+06	12.055	Carpophyllum	0.41	0.7073	1.0173
tgs4	Tide gauge	CMR	2017-02-02		5.30402e+06	1.65766e+06	12.11	Carpophyllum	0.465	0.7073	1.0723
tgs5	Tide gauge	CMR	2017-02-02		5.30402e+06	1.65766e+06	12.089	Carpophyllum	0.444	0.7073	1.0513
tgs6	Tide gauge	CMR	2017-02-02		5.30402e+06	1.65766e+06	12.095	Carpophyllum	0.45	0.7073	1.0573
tgs7	Tide gauge	CMR	2017-02-02		5.30403e+06	1.65766e+06	12.126	Carpophyllum	0.481	0.7073	1.0883				hours	minutes	t decimal		(t - t1)/(t2 - t1)	1	x Pi = A
tgs8	Tide gauge	CMR	2017-02-02		5.30403e+06	1.65766e+06	12.115	Carpophyllum	0.47	0.7073	1.0773				9	38	9.63333	T1	0.626984	1.62698	5.11132
tgs9	Tide gauge	CMR	2017-02-02		5.30403e+06	1.65766e+06	12.103	Carpophyllum	0.458	0.7073	1.0653				15	56	15.9333	T2
tgs10	Tide gauge	CMR	2017-02-02		5.30403e+06	1.65766e+06	12.099	Carpophyllum	0.454	0.7073	1.0613				13	35	13.5833	T
tgs11	Tide gauge	CMR	2017-02-02		5.30403e+06	1.65766e+06	12.051	Carpophyllum	0.406	0.7073	1.0133
tgs12	Tide gauge	CMR	2017-02-02		5.30403e+06	1.65766e+06	12.086	Carpophyllum	0.441	0.7073	1.0483
tgs13	Tide gauge	CMR	2017-02-02		5.30403e+06	1.65765e+06	12.041	Carpophyllum	0.396	0.7073	1.0033
tgs14	Tide gauge	CMR	2017-02-02		5.30403e+06	1.65765e+06	12.03	Carpophyllum	0.385	0.7073	0.9923
tgs15	Tide gauge	CMR	2017-02-02		5.30403e+06	1.65765e+06	12.033	Carpophyllum	0.388	0.7073	0.9953				H1	H2	H		Equation 4
tgs16	Tide gauge	CMR	2017-02-02		5.30403e+06	1.65765e+06	12.022	Carpophyllum	0.377	0.7073	0.9843				1.7	0.27	0.707269		HNIWA = h1+(h2-h1)[(cosA+1)/2]
tgs17	Tide gauge	CMR	2017-02-02		5.30403e+06	1.65765e+06	11.945	Carpophyllum	0.3	0.7073	0.9073
tgs18	Tide gauge	CMR	2017-02-02		5.30403e+06	1.65765e+06	12.22	Carpophyllum	0.575	0.7073	1.1823
tgs20	Tide gauge	CMR	2017-02-02		5.30403e+06	1.65765e+06	12.129	Carpophyllum	0.484	0.7073	1.0913
tgs21	Tide gauge	CMR	2017-02-02		5.30403e+06	1.65765e+06	12.092	Carpophyllum	0.447	0.7073	1.0543
tgx1	Tide gauge	CMR	2017-02-02	1356	5.30408e+06	1.65784e+06	11.529	waterline
tgx2	Tide gauge	CMR	2017-02-02		5.30408e+06	1.65784e+06	12.024	Carpophyllum	0.495	0.597	0.992	0.1	0.968316	0.1025
tgx3	Tide gauge	CMR	2017-02-02		5.30408e+06	1.65784e+06	11.914	Carpophyllum	0.385	0.597	0.882				hours	minutes	t decimal		(t - t1)/(t2 - t1)	1	x Pi = A
tgx4	Tide gauge	CMR	2017-02-02		5.30408e+06	1.65784e+06	11.938	Carpophyllum	0.409	0.597	0.906				9	38	9.63333	T1	0.68254	1.68254	5.28585
tgx5	Tide gauge	CMR	2017-02-02		5.30408e+06	1.65784e+06	11.903	Carpophyllum	0.374	0.597	0.871				15	56	15.9333	T2
tgx6	Tide gauge	CMR	2017-02-02		5.30408e+06	1.65784e+06	11.784	Carpophyllum	0.255	0.597	0.752				13	56	13.9333	T
tgx7	Tide gauge	CMR	2017-02-02		5.30408e+06	1.65784e+06	12.06	Carpophyllum	0.531	0.597	1.028
tgx8	Tide gauge	CMR	2017-02-02		5.30408e+06	1.65785e+06	11.937	Carpophyllum	0.408	0.597	0.905
tgx9	Tide gauge	CMR	2017-02-02		5.30408e+06	1.65785e+06	12.029	Carpophyllum	0.5	0.597	0.997
tgx10	Tide gauge	CMR	2017-02-02		5.30409e+06	1.65785e+06	11.989	Carpophyllum	0.46	0.597	0.957
tgx11	Tide gauge	CMR	2017-02-02		5.30409e+06	1.65785e+06	12.098	Carpophyllum	0.569	0.597	1.066				H1	H2	H		Equation 4
tgx12	Tide gauge	CMR	2017-02-02		5.30408e+06	1.65785e+06	12.088	Carpophyllum	0.559	0.597	1.056				1.7	0.27	0.597079		HNIWA = h1+(h2-h1)[(cosA+1)/2]
tgx13	Tide gauge	CMR	2017-02-02		5.30409e+06	1.65786e+06	12.198	Carpophyllum	0.669	0.597	1.166
tgx14	Tide gauge	CMR	2017-02-02		5.30409e+06	1.65786e+06	12.129	Carpophyllum	0.6	0.597	1.097
tgx15	Tide gauge	CMR	2017-02-02		5.30409e+06	1.65786e+06	12.132	Carpophyllum	0.603	0.597	1.1
tgx16	Tide gauge	CMR	2017-02-02		5.30409e+06	1.65786e+06	11.999	Carpophyllum	0.47	0.597	0.967
tgx17	Tide gauge	CMR	2017-02-02		5.30409e+06	1.65786e+06	11.952	Carpophyllum	0.423	0.597	0.92
tgx18	Tide gauge	CMR	2017-02-02		5.30409e+06	1.65786e+06	12.026	Carpophyllum	0.497	0.597	0.994
tgx19	Tide gauge	CMR	2017-02-02		5.3041e+06	1.65786e+06	11.891	Carpophyllum	0.362	0.597	0.859
tgx20	Tide gauge	CMR	2017-02-02		5.3041e+06	1.65786e+06	11.915	Carpophyllum	0.386	0.597	0.883
tg d s	Tide Gauge	SKK	2017-02-08	2000	5.30409e+06	1.6578e+06	11.091	waterline
tg d s 1	Tide Gauge	SKK	2017-02-08		5.30409e+06	1.6578e+06	12.298	Durvillaea	1.207	0.2857	1.2427	0.25	1.17592	0.0733141
tg d s 2	Tide Gauge	SKK	2017-02-08		5.30409e+06	1.6578e+06	12.194	Durvillaea	1.103	0.2857	1.1387
tg d s 3	Tide Gauge	SKK	2017-02-08		5.30409e+06	1.6578e+06	12.035	Durvillaea	0.944	0.2857	0.9797
tg d s 4	Tide Gauge	SKK	2017-02-08		5.30409e+06	1.6578e+06	12.291	Durvillaea	1.2	0.2857	1.2357
tg d s 5	Tide Gauge	SKK	2017-02-08		5.30409e+06	1.6578e+06	12.254	Durvillaea	1.163	0.2857	1.1987
tg d s 6	Tide Gauge	SKK	2017-02-08		5.30409e+06	1.6578e+06	12.243	Durvillaea	1.152	0.2857	1.1877
tg d s 7	Tide Gauge	SKK	2017-02-08		5.30409e+06	1.65779e+06	12.306	Durvillaea	1.215	0.2857	1.2507
tg d s 8	Tide Gauge	SKK	2017-02-08		5.30409e+06	1.6578e+06	12.167	Durvillaea	1.076	0.2857	1.1117
tg d s 9	Tide Gauge	SKK	2017-02-08		5.30409e+06	1.65779e+06	12.24	Durvillaea	1.149	0.2857	1.1847
tg d s 10	Tide Gauge	SKK	2017-02-08		5.30409e+06	1.65779e+06	12.208	Durvillaea	1.117	0.2857	1.1527
tg d s 11	Tide Gauge	SKK	2017-02-08		5.30409e+06	1.65779e+06	12.207	Durvillaea	1.116	0.2857	1.1517
tg d s 12	Tide Gauge	SKK	2017-02-08		5.3041e+06	1.6578e+06	12.039	Durvillaea	0.948	0.2857	0.9837
tg d s 13	Tide Gauge	SKK	2017-02-08		5.3041e+06	1.6578e+06	12.254	Durvillaea	1.163	0.2857	1.1987				hours	minutes	t decimal		(t - t1)/(t2 - t1)	1	x Pi = A
tg d s 14	Tide Gauge	SKK	2017-02-08		5.3041e+06	1.6578e+06	12.219	Durvillaea	1.128	0.2857	1.1637				15	8	15.1333	T1	0.782842	1.78284	5.60096
tg d_2 s 1	Tide Gauge	SKK	2017-02-08		5.30412e+06	1.65784e+06	12.317	Durvillaea	1.226	0.2857	1.2617				21	21	21.35	T2
tg d_2 s 2	Tide Gauge	SKK	2017-02-08		5.30411e+06	1.65784e+06	12.299	Durvillaea	1.208	0.2857	1.2437				20	0	20	T
tg d_2 s 3	Tide Gauge	SKK	2017-02-08		5.30411e+06	1.65784e+06	12.254	Durvillaea	1.163	0.2857	1.1987
tg d_2 s 4	Tide Gauge	SKK	2017-02-08		5.30411e+06	1.65784e+06	12.292	Durvillaea	1.201	0.2857	1.2367
tg d_2 s 5	Tide Gauge	SKK	2017-02-08		5.30411e+06	1.65784e+06	12.266	Durvillaea	1.175	0.2857	1.2107
tg d_2 s 6	Tide Gauge	SKK	2017-02-08		5.30411e+06	1.65784e+06	12.241	Durvillaea	1.15	0.2857	1.1857
tg d_2 s 7	Tide Gauge	SKK	2017-02-08		5.30411e+06	1.65785e+06	12.248	Durvillaea	1.157	0.2857	1.1927				H1	H2	H		Equation 4
tg d_2 s 8	Tide Gauge	SKK	2017-02-08		5.30411e+06	1.65785e+06	12.205	Durvillaea	1.114	0.2857	1.1497				1.68	0.11	0.285704		HNIWA = h1+(h2-h1)[(cosA+1)/2]
tg d_2 s 9	Tide Gauge	SKK	2017-02-08		5.30412e+06	1.65786e+06	12.27	Durvillaea	1.179	0.2857	1.2147
tg d_2 s 10	Tide Gauge	SKK	2017-02-08		5.30412e+06	1.65786e+06	12.212	Durvillaea	1.121	0.2857	1.1567
tg d_2 s 11	Tide Gauge	SKK	2017-02-08		5.30412e+06	1.65786e+06	12.229	Durvillaea	1.138	0.2857	1.1737
tg d_2 s 12	Tide Gauge	SKK	2017-02-08		5.30412e+06	1.65786e+06	12.22	Durvillaea	1.129	0.2857	1.1647
tg d_2 s 13	Tide Gauge	SKK	2017-02-08		5.30413e+06	1.65786e+06	12.2	Durvillaea	1.109	0.2857	1.1447
tg d_2 s 14	Tide Gauge	SKK	2017-02-08		5.30413e+06	1.65786e+06	12.08	Durvillaea	0.989	0.2857	1.0247
tg d_2 s 15	Tide Gauge	SKK	2017-02-08		5.30413e+06	1.65786e+06	12.181	Durvillaea	1.09	0.2857	1.1257
tg d_2 s 16	Tide Gauge	SKK	2017-02-08		5.30413e+06	1.65786e+06	12.259	Durvillaea	1.168	0.2857	1.2037
tg d_3 d s	Tide Gauge	SKK	2017-02-08		5.30419e+06	1.65792e+06	12.345	Durvillaea	1.254	0.2857	1.2897
tg d_3 d t	Tide Gauge		2017-02-08		5.3042e+06	1.65792e+06	12.326	Durvillaea	1.235	0.2857	1.2707
water mean			2017-02-09	1925	5.30264e+06	1.65606e+06	11.66
c s 1	South Bay Harbour	SKK	2017-02-09		5.30263e+06	1.65606e+06	11.639	Carpophyllum	-0.021	0.7936	0.6726	0.1	0.85045	0.119073
c s 2	South Bay Harbour	SKK	2017-02-09		5.30263e+06	1.65606e+06	11.664	Carpophyllum	0.004	0.7936	0.6976
c s 3	South Bay Harbour	SKK	2017-02-09		5.30263e+06	1.65606e+06	11.688	Carpophyllum	0.028	0.7936	0.7216
c s 4	South Bay Harbour	SKK	2017-02-09		5.30263e+06	1.65606e+06	11.718	Carpophyllum	0.058	0.7936	0.7516
c s 5	South Bay Harbour	SKK	2017-02-09		5.30263e+06	1.65606e+06	11.619	Carpophyllum	-0.041	0.7936	0.6526					hours	minutes	t decimal		(t - t1)/(t2 - t1)	1	x Pi = A
c s 6	South Bay Harbour	SKK	2017-02-09		5.30266e+06	1.65603e+06	11.69	Carpophyllum	0.03	0.7936	0.7236					16	3	16.05	T1	0.543011	1.54301	4.84751
c s 7	South Bay Harbour	SKK	2017-02-09		5.30266e+06	1.65603e+06	11.707	Carpophyllum	0.047	0.7936	0.7406					22	15	22.25	T2
c s 8	South Bay Harbour	SKK	2017-02-09		5.30267e+06	1.65602e+06	11.872	Carpophyllum	0.212	0.7936	0.9056					19	25	19.4167	T
c s 9	South Bay Harbour	SKK	2017-02-09		5.30267e+06	1.65602e+06	11.899	Carpophyllum	0.239	0.7936	0.9326
c s 10	South Bay Harbour	SKK	2017-02-09		5.30267e+06	1.65602e+06	11.881	Carpophyllum	0.221	0.7936	0.9146
c s 11	South Bay Harbour	SKK	2017-02-09		5.30267e+06	1.65601e+06	11.833	Carpophyllum	0.173	0.7936	0.8666
c s 12	South Bay Harbour	SKK	2017-02-09		5.30267e+06	1.65602e+06	11.851	Carpophyllum	0.191	0.7936	0.8846
c s 13	South Bay Harbour	SKK	2017-02-09		5.30267e+06	1.65601e+06	11.842	Carpophyllum	0.182	0.7936	0.8756					H1	H2	H		Equation 4
c s 14	South Bay Harbour	SKK	2017-02-09		5.30267e+06	1.65601e+06	11.854	Carpophyllum	0.194	0.7936	0.8876					1.69	0.11	0.793578		HNIWA = h1+(h2-h1)[(cosA+1)/2]
c s 15	South Bay Harbour	SKK	2017-02-09		5.30267e+06	1.65601e+06	11.883	Carpophyllum	0.223	0.7936	0.9166
c s 16	South Bay Harbour	SKK	2017-02-09		5.30267e+06	1.65601e+06	11.906	Carpophyllum	0.246	0.7936	0.9396
c s 17	South Bay Harbour	SKK	2017-02-09		5.30267e+06	1.65601e+06	12.058	Carpophyllum	0.398	0.7936	1.0916
c s 18	South Bay Harbour	SKK	2017-02-09		5.30267e+06	1.65601e+06	11.975	Carpophyllum	0.315	0.7936	1.0086
c s 19	South Bay Harbour	SKK	2017-02-09		5.30267e+06	1.656e+06	11.87	Carpophyllum	0.21	0.7936	0.9036
c s 20	South Bay Harbour	SKK	2017-02-09		5.30267e+06	1.656e+06	11.888	Carpophyllum	0.228	0.7936	0.9216

## Sheet: LINZ chart uplift all sites
Site	Locality	Operator	Date_NZ	Time_NZ	NZTM_X	NZTM_Y	Elev (m)	Genus	OM	H	UB(TG)	XC/D/G	Mean	SD
om1	Omihi Point	CMR	2017-02-01	1248	5.29552e+06	1.64301e+06	12.275	waterline
om2	Omihi Point	CMR	2017-02-01		5.29552e+06	1.64302e+06	13.228	Carpophyllum	0.953	0.947	1.7	0.2	1.94509	0.126932
om3	Omihi Point	CMR	2017-02-01		5.29552e+06	1.64302e+06	13.254	Carpophyllum	0.979	0.947	1.726
om4	Omihi Point	CMR	2017-02-01		5.29552e+06	1.64302e+06	13.552	Carpophyllum	1.277	0.947	2.024
om5	Omihi Point	CMR	2017-02-01		5.29553e+06	1.64302e+06	13.476	Carpophyllum	1.201	0.947	1.948			hours	minutes	t decimal		(t - t1)/(t2 - t1)	1	x Pi = A
om6	Omihi Point	CMR	2017-02-01		5.29553e+06	1.64302e+06	13.676	Carpophyllum	1.401	0.947	2.148			9	13	9.21667	T1	0.570292	1.57029	4.93322
om7	Omihi Point	CMR	2017-02-01		5.29553e+06	1.64302e+06	13.445	Carpophyllum	1.17	0.947	1.917			15	30	15.5	T2
om8	Omihi Point	CMR	2017-02-01		5.29553e+06	1.64302e+06	13.323	Carpophyllum	1.048	0.947	1.795			12	48	12.8	T
om9	Omihi Point	CMR	2017-02-01		5.29553e+06	1.64302e+06	13.342	Carpophyllum	1.067	0.947	1.814
om10	Omihi Point	CMR	2017-02-01		5.29552e+06	1.643e+06	13.467	Carpophyllum	1.192	0.947	1.939
om11	Omihi Point	CMR	2017-02-01		5.29552e+06	1.643e+06	13.42	Carpophyllum	1.145	0.947	1.892
om12	Omihi Point	CMR	2017-02-01		5.29552e+06	1.64301e+06	13.781	Carpophyllum	1.506	0.947	2.253
om13	Omihi Point	CMR	2017-02-01		5.29551e+06	1.64299e+06	13.533	Carpophyllum	1.258	0.947	2.005			H1	H2	H		Equation 4
om14	Omihi Point	CMR	2017-02-01		5.2955e+06	1.64298e+06	13.419	Carpophyllum	1.144	0.947	1.891			1.8	0.4	0.946674		HLINZ = h1+(h2-h1)[(cosA+1)/2]
om15	Omihi Point	CMR	2017-02-01		5.2955e+06	1.64298e+06	13.448	Carpophyllum	1.173	0.947	1.92
om16	Omihi Point	CMR	2017-02-01		5.2955e+06	1.64298e+06	13.573	Carpophyllum	1.298	0.947	2.045
om17	Omihi Point	CMR	2017-02-01		5.2955e+06	1.64298e+06	13.601	Carpophyllum	1.326	0.947	2.073
om18	Omihi Point	CMR	2017-02-01		5.29549e+06	1.64298e+06	13.424	Carpophyllum	1.149	0.947	1.896
om19	Omihi Point	CMR	2017-02-01		5.29549e+06	1.64298e+06	13.596	Carpophyllum	1.321	0.947	2.068
om20	Omihi Point	CMR	2017-02-01		5.29547e+06	1.64301e+06	13.467	Carpophyllum	1.192	0.947	1.939
om21	Omihi Point	CMR	2017-02-01		5.29547e+06	1.64301e+06	13.46	Carpophyllum	1.185	0.947	1.932
om22	Omihi Point	CMR	2017-02-01		5.29547e+06	1.64301e+06	13.522	Carpophyllum	1.247	0.947	1.994
om23	Omihi Point	CMR	2017-02-01		5.29546e+06	1.64301e+06	13.389	Carpophyllum	1.114	0.947	1.861
om24	Omihi Point	CMR	2017-02-01		5.29546e+06	1.64301e+06	13.485	Carpophyllum	1.21	0.947	1.957
pp1	Paia Point	CMR	2017-02-02	1751	5.29764e+06	1.64413e+06	12.179	waterline
pp2	Paia Point	CMR	2017-02-02		5.29764e+06	1.64412e+06	12.95	Carpophyllum	0.771	0.6723	1.2433	0.2	1.36341	0.107755
pp3	Paia Point	CMR	2017-02-02		5.29764e+06	1.64413e+06	12.968	Carpophyllum	0.789	0.6723	1.2613
pp4	Paia Point	CMR	2017-02-02		5.29764e+06	1.64413e+06	13.046	Carpophyllum	0.867	0.6723	1.3393
pp5	Paia Point	CMR	2017-02-02		5.29764e+06	1.64413e+06	13.076	Carpophyllum	0.897	0.6723	1.3693
pp6	Paia Point	CMR	2017-02-02		5.29764e+06	1.64413e+06	13.069	Carpophyllum	0.89	0.6723	1.3623			hours	minutes	t decimal		(t - t1)/(t2 - t1)	1	x Pi = A
pp7	Paia Point	CMR	2017-02-02		5.29764e+06	1.64413e+06	13.162	Carpophyllum	0.983	0.6723	1.4553			16	4	16.0667	T1	0.290761	1.29076	4.05504
pp8	Paia Point	CMR	2017-02-02		5.29764e+06	1.64413e+06	13.313	Carpophyllum	1.134	0.6723	1.6063			22	12	22.2	T2
pp9	Paia Point	CMR	2017-02-02		5.29764e+06	1.64412e+06	12.949	Carpophyllum	0.77	0.6723	1.2423			17	51	17.85	T
pp10	Paia Point	CMR	2017-02-02		5.29763e+06	1.64413e+06	12.933	Carpophyllum	0.754	0.6723	1.2263
pp11	Paia Point	CMR	2017-02-02		5.29763e+06	1.64413e+06	13.021	Carpophyllum	0.842	0.6723	1.3143
pp12	Paia Point	CMR	2017-02-02		5.29763e+06	1.64413e+06	13.14	Carpophyllum	0.961	0.6723	1.4333
pp13	Paia Point	CMR	2017-02-02		5.29763e+06	1.64413e+06	13.175	Carpophyllum	0.996	0.6723	1.4683
pp14	Paia Point	CMR	2017-02-02		5.29763e+06	1.64413e+06	13.147	Carpophyllum	0.968	0.6723	1.4403			H1	H2	H		Equation 4
pp15	Paia Point	CMR	2017-02-02		5.29763e+06	1.64413e+06	13.282	Carpophyllum	1.103	0.6723	1.5753			0.4	1.8	0.672288		HLINZ = h1+(h2-h1)[(cosA+1)/2]
pp16	Paia Point	CMR	2017-02-02		5.29763e+06	1.64413e+06	13.019	Carpophyllum	0.84	0.6723	1.3123
pp17	Paia Point	CMR	2017-02-02		5.29763e+06	1.64413e+06	13.048	Carpophyllum	0.869	0.6723	1.3413
pp18	Paia Point	CMR	2017-02-02		5.29763e+06	1.64413e+06	13.017	Carpophyllum	0.838	0.6723	1.3103
pp19	Paia Point	CMR	2017-02-02		5.29763e+06	1.64413e+06	13.007	Carpophyllum	0.828	0.6723	1.3003
pp20	Paia Point	CMR	2017-02-02		5.29763e+06	1.64413e+06	13.01	Carpophyllum	0.831	0.6723	1.3033
pp21	Paia Point	CMR	2017-02-02	1758	5.29763e+06	1.64413e+06	12.198	waterline
pp22	Paia Point	CMR	2017-02-02		5.29763e+06	1.64413e+06	13.15	Durvillaea	0.952	0.7061	1.2581	0.4	1.23626	0.18361
pp23	Paia Point	CMR	2017-02-02		5.29763e+06	1.64413e+06	13.136	Durvillaea	0.938	0.7061	1.2441
pp24	Paia Point	CMR	2017-02-02		5.29763e+06	1.64413e+06	13.021	Durvillaea	0.823	0.7061	1.1291
pp25	Paia Point	CMR	2017-02-02		5.29763e+06	1.64413e+06	13.391	Durvillaea	1.193	0.7061	1.4991			hours	minutes	t decimal		(t - t1)/(t2 - t1)	1	x Pi = A
pp26	Paia Point	CMR	2017-02-02		5.29763e+06	1.64413e+06	13.361	Durvillaea	1.163	0.7061	1.4691			16	4	16.0667	T1	0.309783	1.30978	4.1148
pp27	Paia Point	CMR	2017-02-02		5.29763e+06	1.64413e+06	13.165	Durvillaea	0.967	0.7061	1.2731			22	12	22.2	T2
pp28	Paia Point	CMR	2017-02-02		5.29763e+06	1.64413e+06	13.361	Durvillaea	1.163	0.7061	1.4691			17	58	17.9667	T
pp29	Paia Point	CMR	2017-02-02		5.29763e+06	1.64413e+06	13.184	Durvillaea	0.986	0.7061	1.2921
pp30	Paia Point	CMR	2017-02-02		5.29763e+06	1.64413e+06	13.291	Durvillaea	1.093	0.7061	1.3991
pp31	Paia Point	CMR	2017-02-02		5.29764e+06	1.64413e+06	13.247	Durvillaea	1.049	0.7061	1.3551
pp32	Paia Point	CMR	2017-02-02		5.29764e+06	1.64413e+06	13.251	Durvillaea	1.053	0.7061	1.3591
pp33	Paia Point	CMR	2017-02-02		5.29764e+06	1.64413e+06	13.304	Durvillaea	1.106	0.7061	1.4121			H1	H2	H		Equation 4
pp34	Paia Point	CMR	2017-02-02		5.29764e+06	1.64413e+06	13.098	Durvillaea	0.9	0.7061	1.2061			0.4	1.8	0.706146		HLINZ = h1+(h2-h1)[(cosA+1)/2]
pp35	Paia Point	CMR	2017-02-02		5.29764e+06	1.64412e+06	12.89	Durvillaea	0.692	0.7061	0.9981
pp36	Paia Point	CMR	2017-02-02		5.29764e+06	1.64412e+06	12.897	Durvillaea	0.699	0.7061	1.0051
pp37	Paia Point	CMR	2017-02-02		5.29764e+06	1.64412e+06	12.952	Durvillaea	0.754	0.7061	1.0601
pp38	Paia Point	CMR	2017-02-02		5.29764e+06	1.64412e+06	12.908	Durvillaea	0.71	0.7061	1.0161
pp39	Paia Point	CMR	2017-02-02		5.29764e+06	1.64412e+06	12.962	Durvillaea	0.764	0.7061	1.0701
pp40	Paia Point	CMR	2017-02-02		5.29765e+06	1.64412e+06	12.866	Durvillaea	0.668	0.7061	0.9741
pp41	Paia Point	CMR	2017-02-02		5.29765e+06	1.64412e+06	12.851	Durvillaea	0.653	0.7061	0.9591
		CMR
pp50	Paia Point	CMR	2017-02-02	1822	5.29774e+06	1.64413e+06	12.357	waterline
pp51	Paia Point	CMR	2017-02-02		5.29774e+06	1.64413e+06	12.906	uncertain	0.549	0.8321	0.9811	0.4	1.12173	0.156655
pp52	Paia Point	CMR	2017-02-02		5.29774e+06	1.64413e+06	12.937	uncertain	0.58	0.8321	1.0121
pp53	Paia Point	CMR	2017-02-02		5.29774e+06	1.64413e+06	12.912	uncertain	0.555	0.8321	0.9871
pp54	Paia Point	CMR	2017-02-02		5.29774e+06	1.64413e+06	12.849	uncertain	0.492	0.8321	0.9241			hours	minutes	t decimal		(t - t1)/(t2 - t1)	1	x Pi = A
pp55	Paia Point	CMR	2017-02-02		5.29774e+06	1.64413e+06	12.942	uncertain	0.585	0.8321	1.0171			16	4	16.0667	T1	0.375	1.375	4.31969
pp56	Paia Point	CMR	2017-02-02		5.29774e+06	1.64413e+06	12.823	uncertain	0.466	0.8321	0.8981			22	12	22.2	T2
pp57	Paia Point	CMR	2017-02-02		5.29774e+06	1.64412e+06	13.011	uncertain	0.654	0.8321	1.0861			18	22	18.3667	T
pp58	Paia Point	CMR	2017-02-02		5.29774e+06	1.64412e+06	13.114	uncertain	0.757	0.8321	1.1891
pp59	Paia Point	CMR	2017-02-02		5.29774e+06	1.64412e+06	12.972	uncertain	0.615	0.8321	1.0471
pp60	Paia Point	CMR	2017-02-02		5.29775e+06	1.64413e+06	12.99	uncertain	0.633	0.8321	1.0651
pp61	Paia Point	CMR	2017-02-02		5.29774e+06	1.64413e+06	12.99	uncertain	0.633	0.8321	1.0651
pp62	Paia Point	CMR	2017-02-02		5.29775e+06	1.64412e+06	13.169	uncertain	0.812	0.8321	1.2441			H1	H2	H		Equation 4
pp63	Paia Point	CMR	2017-02-02		5.29775e+06	1.64412e+06	13.014	uncertain	0.657	0.8321	1.0891			0.4	1.8	0.832122		HLINZ = h1+(h2-h1)[(cosA+1)/2]
pp64	Paia Point	CMR	2017-02-02		5.29776e+06	1.64412e+06	13.444	uncertain	1.087	0.8321	1.5191
pp65	Paia Point	CMR	2017-02-02		5.29776e+06	1.64413e+06	13.261	uncertain	0.904	0.8321	1.3361
pp66	Paia Point	CMR	2017-02-02		5.29776e+06	1.64413e+06	13.258	uncertain	0.901	0.8321	1.3331
pp67	Paia Point	CMR	2017-02-02		5.29776e+06	1.64413e+06	13.099	uncertain	0.742	0.8321	1.1741
pp68	Paia Point	CMR	2017-02-02		5.29776e+06	1.64413e+06	13.125	uncertain	0.768	0.8321	1.2001
pp69	Paia Point	CMR	2017-02-02		5.29776e+06	1.64413e+06	13.07	uncertain	0.713	0.8321	1.1451
tgs1	Tide gauge	CMR	2017-02-02	1335	5.30403e+06	1.65768e+06	11.645	waterline
tgs2	Tide gauge	CMR	2017-02-02		5.30403e+06	1.65768e+06	11.994	Carpophyllum	0.349	0.8781	1.0271	0.2	1.10863	0.0595906
tgs3	Tide gauge	CMR	2017-02-02		5.30403e+06	1.65768e+06	12.055	Carpophyllum	0.41	0.8781	1.0881
tgs4	Tide gauge	CMR	2017-02-02		5.30402e+06	1.65766e+06	12.11	Carpophyllum	0.465	0.8781	1.1431
tgs5	Tide gauge	CMR	2017-02-02		5.30402e+06	1.65766e+06	12.089	Carpophyllum	0.444	0.8781	1.1221
tgs6	Tide gauge	CMR	2017-02-02		5.30402e+06	1.65766e+06	12.095	Carpophyllum	0.45	0.8781	1.1281			hours	minutes	t decimal		(t - t1)/(t2 - t1)	1	x Pi = A
tgs7	Tide gauge	CMR	2017-02-02		5.30403e+06	1.65766e+06	12.126	Carpophyllum	0.481	0.8781	1.1591			9	49	9.81667	T1	0.602667	1.60267	5.03493
tgs8	Tide gauge	CMR	2017-02-02		5.30403e+06	1.65766e+06	12.115	Carpophyllum	0.47	0.8781	1.1481			16	4	16.0667	T2
tgs9	Tide gauge	CMR	2017-02-02		5.30403e+06	1.65766e+06	12.103	Carpophyllum	0.458	0.8781	1.1361			13	35	13.5833	T
tgs10	Tide gauge	CMR	2017-02-02		5.30403e+06	1.65766e+06	12.099	Carpophyllum	0.454	0.8781	1.1321
tgs11	Tide gauge	CMR	2017-02-02		5.30403e+06	1.65766e+06	12.051	Carpophyllum	0.406	0.8781	1.0841
tgs12	Tide gauge	CMR	2017-02-02		5.30403e+06	1.65766e+06	12.086	Carpophyllum	0.441	0.8781	1.1191
tgs13	Tide gauge	CMR	2017-02-02		5.30403e+06	1.65765e+06	12.041	Carpophyllum	0.396	0.8781	1.0741
tgs14	Tide gauge	CMR	2017-02-02		5.30403e+06	1.65765e+06	12.03	Carpophyllum	0.385	0.8781	1.0631			H1	H2	H		Equation 4
tgs15	Tide gauge	CMR	2017-02-02		5.30403e+06	1.65765e+06	12.033	Carpophyllum	0.388	0.8781	1.0661			1.8	0.4	0.878118		HLINZ = h1+(h2-h1)[(cosA+1)/2]
tgs16	Tide gauge	CMR	2017-02-02		5.30403e+06	1.65765e+06	12.022	Carpophyllum	0.377	0.8781	1.0551
tgs17	Tide gauge	CMR	2017-02-02		5.30403e+06	1.65765e+06	11.945	Carpophyllum	0.3	0.8781	0.9781
tgs18	Tide gauge	CMR	2017-02-02		5.30403e+06	1.65765e+06	12.22	Carpophyllum	0.575	0.8781	1.2531
tgs20	Tide gauge	CMR	2017-02-02		5.30403e+06	1.65765e+06	12.129	Carpophyllum	0.484	0.8781	1.1621
tgs21	Tide gauge	CMR	2017-02-02		5.30403e+06	1.65765e+06	12.092	Carpophyllum	0.447	0.8781	1.1251
tgx1	Tide gauge	CMR	2017-02-02	1356	5.30408e+06	1.65784e+06	11.529	waterline
tgx2	Tide gauge	CMR	2017-02-02		5.30408e+06	1.65784e+06	12.024	Carpophyllum	0.495	0.7653	1.0603	0.2	1.03662	0.1025
tgx3	Tide gauge	CMR	2017-02-02		5.30408e+06	1.65784e+06	11.914	Carpophyllum	0.385	0.7653	0.9503
tgx4	Tide gauge	CMR	2017-02-02		5.30408e+06	1.65784e+06	11.938	Carpophyllum	0.409	0.7653	0.9743
tgx5	Tide gauge	CMR	2017-02-02		5.30408e+06	1.65784e+06	11.903	Carpophyllum	0.374	0.7653	0.9393			hours	minutes	t decimal		(t - t1)/(t2 - t1)	1	x Pi = A
tgx6	Tide gauge	CMR	2017-02-02		5.30408e+06	1.65784e+06	11.784	Carpophyllum	0.255	0.7653	0.8203			9	49	9.81667	T1	0.658667	1.65867	5.21086
tgx7	Tide gauge	CMR	2017-02-02		5.30408e+06	1.65784e+06	12.06	Carpophyllum	0.531	0.7653	1.0963			16	4	16.0667	T2
tgx8	Tide gauge	CMR	2017-02-02		5.30408e+06	1.65785e+06	11.937	Carpophyllum	0.408	0.7653	0.9733			13	56	13.9333	T
tgx9	Tide gauge	CMR	2017-02-02		5.30408e+06	1.65785e+06	12.029	Carpophyllum	0.5	0.7653	1.0653
tgx10	Tide gauge	CMR	2017-02-02		5.30409e+06	1.65785e+06	11.989	Carpophyllum	0.46	0.7653	1.0253
tgx11	Tide gauge	CMR	2017-02-02		5.30409e+06	1.65785e+06	12.098	Carpophyllum	0.569	0.7653	1.1343
tgx12	Tide gauge	CMR	2017-02-02		5.30408e+06	1.65785e+06	12.088	Carpophyllum	0.559	0.7653	1.1243
tgx13	Tide gauge	CMR	2017-02-02		5.30409e+06	1.65786e+06	12.198	Carpophyllum	0.669	0.7653	1.2343			H1	H2	H		Equation 4
tgx14	Tide gauge	CMR	2017-02-02		5.30409e+06	1.65786e+06	12.129	Carpophyllum	0.6	0.7653	1.1653			1.8	0.4	0.765345		HLINZ = h1+(h2-h1)[(cosA+1)/2]
tgx15	Tide gauge	CMR	2017-02-02		5.30409e+06	1.65786e+06	12.132	Carpophyllum	0.603	0.7653	1.1683
tgx16	Tide gauge	CMR	2017-02-02		5.30409e+06	1.65786e+06	11.999	Carpophyllum	0.47	0.7653	1.0353
tgx17	Tide gauge	CMR	2017-02-02		5.30409e+06	1.65786e+06	11.952	Carpophyllum	0.423	0.7653	0.9883
tgx18	Tide gauge	CMR	2017-02-02		5.30409e+06	1.65786e+06	12.026	Carpophyllum	0.497	0.7653	1.0623
tgx19	Tide gauge	CMR	2017-02-02		5.3041e+06	1.65786e+06	11.891	Carpophyllum	0.362	0.7653	0.9273
tgx20	Tide gauge	CMR	2017-02-02		5.3041e+06	1.65786e+06	11.915	Carpophyllum	0.386	0.7653	0.9513
tg d s	Tide Gauge	SKK	2017-02-08	2000	5.30409e+06	1.6578e+06	11.091	waterline
tg d s 1	Tide Gauge	SKK	2017-02-08		5.30409e+06	1.6578e+06	12.298	Durvillaea	1.207	0.4955	1.3025	0.4	1.23572	0.0733141
tg d s 2	Tide Gauge	SKK	2017-02-08		5.30409e+06	1.6578e+06	12.194	Durvillaea	1.103	0.4955	1.1985
tg d s 3	Tide Gauge	SKK	2017-02-08		5.30409e+06	1.6578e+06	12.035	Durvillaea	0.944	0.4955	1.0395
tg d s 4	Tide Gauge	SKK	2017-02-08		5.30409e+06	1.6578e+06	12.291	Durvillaea	1.2	0.4955	1.2955			hours	minutes	t decimal		(t - t1)/(t2 - t1)	1	x Pi = A
tg d s 5	Tide Gauge	SKK	2017-02-08		5.30409e+06	1.6578e+06	12.254	Durvillaea	1.163	0.4955	1.2585			15	17	15.2833	T1	0.764865	1.76486	5.54449
tg d s 6	Tide Gauge	SKK	2017-02-08		5.30409e+06	1.6578e+06	12.243	Durvillaea	1.152	0.4955	1.2475			21	27	21.45	T2
tg d s 7	Tide Gauge	SKK	2017-02-08		5.30409e+06	1.65779e+06	12.306	Durvillaea	1.215	0.4955	1.3105			20	0	20	T
tg d s 8	Tide Gauge	SKK	2017-02-08		5.30409e+06	1.6578e+06	12.167	Durvillaea	1.076	0.4955	1.1715
tg d s 9	Tide Gauge	SKK	2017-02-08		5.30409e+06	1.65779e+06	12.24	Durvillaea	1.149	0.4955	1.2445
tg d s 10	Tide Gauge	SKK	2017-02-08		5.30409e+06	1.65779e+06	12.208	Durvillaea	1.117	0.4955	1.2125
tg d s 11	Tide Gauge	SKK	2017-02-08		5.30409e+06	1.65779e+06	12.207	Durvillaea	1.116	0.4955	1.2115
tg d s 12	Tide Gauge	SKK	2017-02-08		5.3041e+06	1.6578e+06	12.039	Durvillaea	0.948	0.4955	1.0435			H1	H2	H		Equation 4
tg d s 13	Tide Gauge	SKK	2017-02-08		5.3041e+06	1.6578e+06	12.254	Durvillaea	1.163	0.4955	1.2585			1.8	0.3	0.495491		HLINZ = h1+(h2-h1)[(cosA+1)/2]
tg d s 14	Tide Gauge	SKK	2017-02-08		5.3041e+06	1.6578e+06	12.219	Durvillaea	1.128	0.4955	1.2235
tg d_2 s 1	Tide Gauge	SKK	2017-02-08		5.30412e+06	1.65784e+06	12.317	Durvillaea	1.226	0.4955	1.3215
tg d_2 s 2	Tide Gauge	SKK	2017-02-08		5.30411e+06	1.65784e+06	12.299	Durvillaea	1.208	0.4955	1.3035
tg d_2 s 3	Tide Gauge	SKK	2017-02-08		5.30411e+06	1.65784e+06	12.254	Durvillaea	1.163	0.4955	1.2585
tg d_2 s 4	Tide Gauge	SKK	2017-02-08		5.30411e+06	1.65784e+06	12.292	Durvillaea	1.201	0.4955	1.2965
tg d_2 s 5	Tide Gauge	SKK	2017-02-08		5.30411e+06	1.65784e+06	12.266	Durvillaea	1.175	0.4955	1.2705
tg d_2 s 6	Tide Gauge	SKK	2017-02-08		5.30411e+06	1.65784e+06	12.241	Durvillaea	1.15	0.4955	1.2455
tg d_2 s 7	Tide Gauge	SKK	2017-02-08		5.30411e+06	1.65785e+06	12.248	Durvillaea	1.157	0.4955	1.2525
tg d_2 s 8	Tide Gauge	SKK	2017-02-08		5.30411e+06	1.65785e+06	12.205	Durvillaea	1.114	0.4955	1.2095
tg d_2 s 9	Tide Gauge	SKK	2017-02-08		5.30412e+06	1.65786e+06	12.27	Durvillaea	1.179	0.4955	1.2745
tg d_2 s 10	Tide Gauge	SKK	2017-02-08		5.30412e+06	1.65786e+06	12.212	Durvillaea	1.121	0.4955	1.2165
tg d_2 s 11	Tide Gauge	SKK	2017-02-08		5.30412e+06	1.65786e+06	12.229	Durvillaea	1.138	0.4955	1.2335
tg d_2 s 12	Tide Gauge	SKK	2017-02-08		5.30412e+06	1.65786e+06	12.22	Durvillaea	1.129	0.4955	1.2245
tg d_2 s 13	Tide Gauge	SKK	2017-02-08		5.30413e+06	1.65786e+06	12.2	Durvillaea	1.109	0.4955	1.2045
tg d_2 s 14	Tide Gauge	SKK	2017-02-08		5.30413e+06	1.65786e+06	12.08	Durvillaea	0.989	0.4955	1.0845
tg d_2 s 15	Tide Gauge	SKK	2017-02-08		5.30413e+06	1.65786e+06	12.181	Durvillaea	1.09	0.4955	1.1855
tg d_2 s 16	Tide Gauge	SKK	2017-02-08		5.30413e+06	1.65786e+06	12.259	Durvillaea	1.168	0.4955	1.2635
tg d_3 d s	Tide Gauge	SKK	2017-02-08		5.30419e+06	1.65792e+06	12.345	Durvillaea	1.254	0.4955	1.3495
tg d_3 d t	Tide Gauge	SKK	2017-02-08		5.3042e+06	1.65792e+06	12.326	Durvillaea	1.235	0.4955	1.3305
water mean			2017-02-09	7.25pm	5.30264e+06	1.65606e+06	11.66
c s 1	South Bay Harbour	SKK	2017-02-09		5.30263e+06	1.65606e+06	11.639	Carpophyllum	-0.021	1.0182	0.7972	0.2	0.97505	0.119073
c s 2	South Bay Harbour	SKK	2017-02-09		5.30263e+06	1.65606e+06	11.664	Carpophyllum	0.004	1.0182	0.8222
c s 3	South Bay Harbour	SKK	2017-02-09		5.30263e+06	1.65606e+06	11.688	Carpophyllum	0.028	1.0182	0.8462
c s 4	South Bay Harbour	SKK	2017-02-09		5.30263e+06	1.65606e+06	11.718	Carpophyllum	0.058	1.0182	0.8762			hours	minutes	t decimal		(t - t1)/(t2 - t1)	1	x Pi = A
c s 5	South Bay Harbour	SKK	2017-02-09		5.30263e+06	1.65606e+06	11.619	Carpophyllum	-0.041	1.0182	0.7772			16	15	16.25	T1	0.513514	1.51351	4.75484
c s 6	South Bay Harbour	SKK	2017-02-09		5.30266e+06	1.65603e+06	11.69	Carpophyllum	0.03	1.0182	0.8482			22	25	22.4167	T2
c s 7	South Bay Harbour	SKK	2017-02-09		5.30266e+06	1.65603e+06	11.707	Carpophyllum	0.047	1.0182	0.8652			19	25	19.4167	T
c s 8	South Bay Harbour	SKK	2017-02-09		5.30267e+06	1.65602e+06	11.872	Carpophyllum	0.212	1.0182	1.0302
c s 9	South Bay Harbour	SKK	2017-02-09		5.30267e+06	1.65602e+06	11.899	Carpophyllum	0.239	1.0182	1.0572
c s 10	South Bay Harbour	SKK	2017-02-09		5.30267e+06	1.65602e+06	11.881	Carpophyllum	0.221	1.0182	1.0392
c s 11	South Bay Harbour	SKK	2017-02-09		5.30267e+06	1.65601e+06	11.833	Carpophyllum	0.173	1.0182	0.9912
c s 12	South Bay Harbour	SKK	2017-02-09		5.30267e+06	1.65602e+06	11.851	Carpophyllum	0.191	1.0182	1.0092			H1	H2	H		Equation 4
c s 13	South Bay Harbour	SKK	2017-02-09		5.30267e+06	1.65601e+06	11.842	Carpophyllum	0.182	1.0182	1.0002			1.8	0.3	1.01817		HLINZ = h1+(h2-h1)[(cosA+1)/2]
c s 14	South Bay Harbour	SKK	2017-02-09		5.30267e+06	1.65601e+06	11.854	Carpophyllum	0.194	1.0182	1.0122
c s 15	South Bay Harbour	SKK	2017-02-09		5.30267e+06	1.65601e+06	11.883	Carpophyllum	0.223	1.0182	1.0412
c s 16	South Bay Harbour	SKK	2017-02-09		5.30267e+06	1.65601e+06	11.906	Carpophyllum	0.246	1.0182	1.0642
c s 17	South Bay Harbour	SKK	2017-02-09		5.30267e+06	1.65601e+06	12.058	Carpophyllum	0.398	1.0182	1.2162
c s 18	South Bay Harbour	SKK	2017-02-09		5.30267e+06	1.65601e+06	11.975	Carpophyllum	0.315	1.0182	1.1332
c s 19	South Bay Harbour	SKK	2017-02-09		5.30267e+06	1.656e+06	11.87	Carpophyllum	0.21	1.0182	1.0282
c s 20	South Bay Harbour	SKK	2017-02-09	7.39pm	5.30267e+06	1.656e+06	11.888	Carpophyllum	0.228	1.0182	1.0462

## Sheet: Tape measure uplift all sites
Site	Locality_name	Operator	Date_NZ	Time_NZ	NZTM_X	NZTM_Y	Genus	Exposure	OM (m)	H (m)	UB(TG)	MLWS	XC/D/G	Mean		Site mean	Site SD
1	Omihi Point	AN	2017-02-01	12:45:00	1642963	5295583	Carpophyllum	Exposed	1.55	1.88	2.07	1.1	0.26	1.65765		1.65765	0.172646
2	Omihi Point	AN	2017-02-01		1642963	5295583	Carpophyllum	Exposed	1.3	1.88	1.82	1.1	0.26
3	Omihi Point	AN	2017-02-01		1642963	5295583	Carpophyllum	Sheltered	1.2	1.88	1.72	1.1	0.26
4	Omihi Point	AN	2017-02-01		1642963	5295583	Carpophyllum	Sheltered	1.1	1.88	1.62	1.1	0.26
5	Omihi Point	AN	2017-02-01		1642963	5295583	Carpophyllum	Sheltered	1.3	1.88	1.82	1.1	0.26
6	Omihi Point	AN	2017-02-01		1642963	5295583	Carpophyllum	Sheltered	1.3	1.88	1.82	1.1	0.26
7	Omihi Point	AN	2017-02-01		1642963	5295583	Carpophyllum	Sheltered	1.25	1.88	1.77	1.1	0.26
8	Omihi Point	AN	2017-02-01		1642963	5295583	Carpophyllum	Sheltered	1.27	1.88	1.79	1.1	0.26
9	Omihi Point	AN	2017-02-01		1642963	5295583	Durvillaea	Exposed	1.1	1.88	1.5	1.1	0.38
10	Omihi Point	AN	2017-02-01		1642963	5295583	Durvillaea	Sheltered	1.1	1.88	1.5	1.1	0.38
11	Omihi Point	AN	2017-02-01		1642963	5295583	Durvillaea	Sheltered	1.2	1.88	1.6	1.1	0.38
12	Omihi Point	AN	2017-02-01		1642963	5295583	Durvillaea	Sheltered	1.2	1.88	1.6	1.1	0.38
13	Omihi Point	AN	2017-02-01		1642963	5295583	Durvillaea	Sheltered	1.15	1.88	1.55	1.1	0.38
14	Omihi Point	AN	2017-02-01		1642963	5295583	Durvillaea	Sheltered	1.05	1.88	1.45	1.1	0.38
15	Omihi Point	AN	2017-02-01		1642963	5295583	Durvillaea	Sheltered	1	1.88	1.4	1.1	0.38
16	Omihi Point	AN	2017-02-01		1642963	5295583	Durvillaea	Sheltered	1.15	1.88	1.55	1.1	0.38
17	Omihi Point	AN	2017-02-01		1642963	5295583	Durvillaea	Sheltered	1.2	1.88	1.6	1.1	0.38
a	Paia Point	AN	2017-02-02	17:45:00	1.64412e+06	5.29764e+06	Carpophyllum	Sheltered	0.8	1.75	1.19	1.1	0.26	1.27214		1.27214	0.0877858
b	Paia Point	AN	2017-02-02		1.64412e+06	5.29764e+06	Carpophyllum	Sheltered	0.85	1.75	1.24	1.1	0.26
c	Paia Point	AN	2017-02-02		1.64412e+06	5.29764e+06	Carpophyllum	Sheltered	0.9	1.75	1.29	1.1	0.26
d	Paia Point	AN	2017-02-02		1.64412e+06	5.29764e+06	Carpophyllum	Sheltered	0.9	1.75	1.29	1.1	0.26
e	Paia Point	AN	2017-02-02		1.64412e+06	5.29764e+06	Durvillaea	Exposed	0.95	1.75	1.22	1.1	0.38
f	Paia Point	AN	2017-02-02		1.64412e+06	5.29764e+06	Carpophyllum	Exposed	1	1.75	1.39	1.1	0.26
g	Paia Point	AN	2017-02-02		1.64412e+06	5.29764e+06	Carpophyllum	Exposed	0.95	1.75	1.34	1.1	0.26
h	Paia Point	AN	2017-02-02		1.64412e+06	5.29764e+06	Durvillaea	Exposed	0.95	1.75	1.22	1.1	0.38
i	Paia Point	AN	2017-02-02		1.64412e+06	5.29764e+06	Carpophyllum	Exposed	0.9	1.75	1.29	1.1	0.26
j	Paia Point	AN	2017-02-02		1.64412e+06	5.29764e+06	Durvillaea	Exposed	0.8	1.75	1.07	1.1	0.38
k	Paia Point	AN	2017-02-02		1.64412e+06	5.29764e+06	Durvillaea	Exposed	1	1.75	1.27	1.1	0.38
l	Paia Point	AN	2017-02-02		1.64412e+06	5.29764e+06	Carpophyllum	Sheltered	0.85	1.75	1.24	1.1	0.26
m	Paia Point	AN	2017-02-02		1.64412e+06	5.29764e+06	Carpophyllum	Sheltered	0.85	1.75	1.24	1.1	0.26
n	Paia Point	AN	2017-02-02		1.64412e+06	5.29764e+06	Carpophyllum	Sheltered	1	1.75	1.39	1.1	0.26
o	Paia Point	AN	2017-02-02		1.64412e+06	5.29764e+06	Durvillaea	Sheltered	0.95	1.75	1.22	1.1	0.38
p	Paia Point	AN	2017-02-02		1.64412e+06	5.29764e+06	Carpophyllum	Sheltered	0.95	1.75	1.34	1.1	0.26
q	Paia Point	AN	2017-02-02		1.64412e+06	5.29764e+06	Durvillaea	Sheltered	1.05	1.75	1.32	1.1	0.38
r	Paia Point	AN	2017-02-02		1.64412e+06	5.29764e+06	Carpophyllum	Sheltered	1	1.75	1.39	1.1	0.26
s	Paia Point	AN	2017-02-02		1.64412e+06	5.29764e+06	Carpophyllum	Sheltered	1	1.75	1.39	1.1	0.26
t	Paia Point	AN	2017-02-02		1.64412e+06	5.29764e+06	Durvillaea	Sheltered	0.9	1.75	1.17	1.1	0.38
u	Paia Point	AN	2017-02-02		1.64412e+06	5.29764e+06	Durvillaea	Sheltered	0.95	1.75	1.22	1.1	0.38
v	Paia Point	AN	2017-02-02		1.64412e+06	5.29764e+06	Carpophyllum	Sheltered	1	1.75	1.39	1.1	0.26
w	Paia Point	AN	2017-02-02		1.64412e+06	5.29764e+06	Carpophyllum	Sheltered	0.95	1.75	1.34	1.1	0.26
x	Paia Point	AN	2017-02-02		1.64412e+06	5.29764e+06	Carpophyllum	Sheltered	1	1.75	1.39	1.1	0.26
y	Paia Point	AN	2017-02-02		1.64412e+06	5.29764e+06	Carpophyllum	Sheltered	0.85	1.75	1.24	1.1	0.26
z	Paia Point	AN	2017-02-02		1.64412e+06	5.29764e+06	Carpophyllum	Sheltered	0.85	1.75	1.24	1.1	0.26
aa	Paia Point	AN	2017-02-02		1.64412e+06	5.29764e+06	Durvillaea	Sheltered	0.85	1.75	1.12	1.1	0.38
bb	Paia Point	AN	2017-02-02	18:00:00	1.64412e+06	5.29764e+06	Durvillaea	Sheltered	0.9	1.75	1.17	1.1	0.38
a	Paia Point N	AN	2017-02-02	18:10:00	1.64412e+06	5.29775e+06	Carpophyllum	Sheltered	0.7	1.853	1.193	1.1	0.26	1.2335		1.2335	0.0930464
b	Paia Point N	AN	2017-02-02		1.64412e+06	5.29775e+06	Carpophyllum	Sheltered	0.7	1.853	1.193	1.1	0.26
c	Paia Point N	AN	2017-02-02		1.64412e+06	5.29775e+06	Carpophyllum	Sheltered	0.7	1.853	1.193	1.1	0.26
d	Paia Point N	AN	2017-02-02		1.64412e+06	5.29775e+06	Durvillaea	Sheltered	0.8	1.853	1.173	1.1	0.38
e	Paia Point N	AN	2017-02-02		1.64412e+06	5.29775e+06	Carpophyllum	Sheltered	0.8	1.853	1.293	1.1	0.26
f	Paia Point N	AN	2017-02-02		1.64412e+06	5.29775e+06	Durvillaea	Sheltered	0.8	1.853	1.173	1.1	0.38
g	Paia Point N	AN	2017-02-02		1.64412e+06	5.29775e+06	Carpophyllum	Sheltered	0.8	1.853	1.293	1.1	0.26
h	Paia Point N	AN	2017-02-02		1.64412e+06	5.29775e+06	Carpophyllum	Sheltered	0.75	1.853	1.243	1.1	0.26
i	Paia Point N	AN	2017-02-02		1.64412e+06	5.29775e+06	Carpophyllum	Sheltered	0.75	1.853	1.243	1.1	0.26
j	Paia Point N	AN	2017-02-02		1.64412e+06	5.29775e+06	Durvillaea	Sheltered	0.8	1.853	1.173	1.1	0.38
k	Paia Point N	AN	2017-02-02		1.64412e+06	5.29775e+06	Carpophyllum	Exposed	1	1.853	1.493	1.1	0.26
l	Paia Point N	AN	2017-02-02		1.64412e+06	5.29775e+06	Durvillaea	Sheltered	0.65	1.853	1.023	1.1	0.38
m	Paia Point N	AN	2017-02-02		1.64412e+06	5.29775e+06	Carpophyllum	Sheltered	0.8	1.853	1.293	1.1	0.26
n	Paia Point N	AN	2017-02-02		1.64412e+06	5.29775e+06	Carpophyllum	Sheltered	0.85	1.853	1.343	1.1	0.26
o	Paia Point N	AN	2017-02-02		1.64412e+06	5.29775e+06	Carpophyllum	Sheltered	0.7	1.853	1.193	1.1	0.26
p	Paia Point N	AN	2017-02-02		1.64412e+06	5.29775e+06	Carpophyllum	Sheltered	0.8	1.853	1.293	1.1	0.26
q	Paia Point N	AN	2017-02-02		1.64412e+06	5.29775e+06	Durvillaea	Exposed	0.9	1.853	1.273	1.1	0.38
r	Paia Point N	AN	2017-02-02		1.64412e+06	5.29775e+06	Durvillaea	Exposed	0.8	1.853	1.173	1.1	0.38
s	Paia Point N	AN	2017-02-02		1.64412e+06	5.29775e+06	Durvillaea	Exposed	0.8	1.853	1.173	1.1	0.38
t	Paia Point N	AN	2017-02-02	18:20:00	1.64412e+06	5.29775e+06	Carpophyllum	Sheltered	0.75	1.853	1.243	1.1	0.26
a	Tide gauge	VM	2017-02-02	13:35:00	1657663	5304021	Carpophyllum	Exposed	0.6	1.885	1.125	1.1	0.26	1.05455		1.00444	0.0694982
b	Tide gauge	VM	2017-02-02		42°24'50.3"	173°42'03.0"	Carpophyllum	Exposed	0.55	1.885	1.075	1.1	0.26
c	Tide gauge	VM	2017-02-02		42°24'50.3"	173°42'03.0"	Carpophyllum	Exposed	0.6	1.885	1.125	1.1	0.26
d	Tide gauge	VM	2017-02-02		42°24'50.3"	173°42'03.0"	Carpophyllum	Sheltered	0.5	1.885	1.025	1.1	0.26
e	Tide gauge	VM	2017-02-02		42°24'50.3"	173°42'03.0"	Carpophyllum	Exposed	0.55	1.885	1.075	1.1	0.26
f	Tide gauge	VM	2017-02-02		42°24'50.3"	173°42'03.0"	Carpophyllum	Sheltered	0.6	1.885	1.125	1.1	0.26
g	Tide gauge	VM	2017-02-02		42°24'50.3"	173°42'03.0"	Carpophyllum	Sheltered	0.55	1.885	1.075	1.1	0.26
h	Tide gauge	VM	2017-02-02		42°24'50.3"	173°42'03.0"	Carpophyllum	Sheltered	0.5	1.885	1.025	1.1	0.26
i	Tide gauge	VM	2017-02-02		42°24'50.3"	173°42'03.0"	Carpophyllum	Sheltered	0.5	1.885	1.025	1.1	0.26
j	Tide gauge	VM	2017-02-02		42°24'50.3"	173°42'03.0"	Carpophyllum	Sheltered	0.45	1.885	0.975	1.1	0.26
k	Tide gauge	VM	2017-02-02		42°24'50.3"	173°42'03.0"	Carpophyllum	Sheltered	0.4	1.885	0.925	1.1	0.26
l	Tide gauge	VM	2017-02-02		42°24'50.3"	173°42'03.0"	Carpophyllum	Sheltered	0.5	1.885	1.025	1.1	0.26
o	Tide gauge	VM	2017-02-02		42°24'50.3"	173°42'03.0"	Carpophyllum	Exposed	0.55	1.885	1.075	1.1	0.26
m	Tide gauge	VM	2017-02-02		42°24'50.3"	173°42'03.0"	Carpophyllum	Exposed	0.55	1.885	1.075	1.1	0.26
n	Tide gauge	VM	2017-02-02		42°24'50.3"	173°42'03.0"	Carpophyllum	Exposed	0.5	1.885	1.025	1.1	0.26
o	Tide gauge	VM	2017-02-02		42°24'50.3"	173°42'03.0"	Carpophyllum	Exposed	0.5	1.885	1.025	1.1	0.26
p	Tide gauge	VM	2017-02-02		42°24'50.3"	173°42'03.0"	Carpophyllum	Exposed	0.55	1.885	1.075	1.1	0.26
q	Tide gauge	VM	2017-02-02		42°24'50.3"	173°42'03.0"	Carpophyllum	Exposed	0.55	1.885	1.075	1.1	0.26
r	Tide gauge	VM	2017-02-02		42°24'50.3"	173°42'03.0"	Carpophyllum	Exposed	0.5	1.885	1.025	1.1	0.26
s	Tide gauge	VM	2017-02-02		42°24'50.3"	173°42'03.0"	Carpophyllum	Exposed	0.6	1.885	1.125	1.1	0.26
t	Tide gauge	VM	2017-02-02		42°24'50.3"	173°42'03.0"	Carpophyllum	Exposed	0.5	1.885	1.025	1.1	0.26
u	Tide gauge	VM	2017-02-02	13:45:00	42°24'50.3"	173°42'03.0"	Carpophyllum	Exposed	0.55	1.885	1.075	1.1	0.26
a	Tide gauge	VM	2017-02-02	13:57:00	1657810	5304041	Carpophyllum	Exposed	0.5	1.781	0.921	1.1	0.26	0.954333
b	Tide gauge	VM	2017-02-02		42°24'49.6"	173°42'09.4"	Carpophyllum	Exposed	0.6	1.781	1.021	1.1	0.26
c	Tide gauge	VM	2017-02-02		42°24'49.6"	173°42'09.4"	Carpophyllum	Exposed	0.55	1.781	0.971	1.1	0.26
d	Tide gauge	VM	2017-02-02		42°24'49.6"	173°42'09.4"	Carpophyllum	Exposed	0.5	1.781	0.921	1.1	0.26
e	Tide gauge	VM	2017-02-02		42°24'49.6"	173°42'09.4"	Carpophyllum	Exposed	0.5	1.781	0.921	1.1	0.26
f	Tide gauge	VM	2017-02-02		42°24'49.6"	173°42'09.4"	Carpophyllum	Exposed	0.55	1.781	0.971	1.1	0.26
g	Tide gauge	VM	2017-02-02		42°24'49.6"	173°42'09.4"	Carpophyllum	Exposed	0.6	1.781	1.021	1.1	0.26
h	Tide gauge	VM	2017-02-02		42°24'49.6"	173°42'09.4"	Carpophyllum	Sheltered	0.55	1.781	0.971	1.1	0.26
i	Tide gauge	VM	2017-02-02		42°24'49.6"	173°42'09.4"	Carpophyllum	Sheltered	0.6	1.781	1.021	1.1	0.26
j	Tide gauge	VM	2017-02-02		42°24'49.6"	173°42'09.4"	Carpophyllum	Sheltered	0.6	1.781	1.021	1.1	0.26
k	Tide gauge	VM	2017-02-02		42°24'49.6"	173°42'09.4"	Carpophyllum	Sheltered	0.55	1.781	0.971	1.1	0.26
l	Tide gauge	VM	2017-02-02		42°24'49.6"	173°42'09.4"	Carpophyllum	Sheltered	0.6	1.781	1.021	1.1	0.26
m	Tide gauge	VM	2017-02-02		42°24'49.6"	173°42'09.4"	Carpophyllum	Sheltered	0.5	1.781	0.921	1.1	0.26
n	Tide gauge	VM	2017-02-02		42°24'49.6"	173°42'09.4"	Carpophyllum	Sheltered	0.55	1.781	0.971	1.1	0.26
o	Tide gauge	VM	2017-02-02		42°24'49.6"	173°42'09.4"	Carpophyllum	Sheltered	0.5	1.781	0.921	1.1	0.26
p	Tide gauge	VM	2017-02-02		42°24'49.6"	173°42'09.4"	Carpophyllum	Sheltered	0.5	1.781	0.921	1.1	0.26
q	Tide gauge	VM	2017-02-02		42°24'49.6"	173°42'09.4"	Carpophyllum	Sheltered	0.5	1.781	0.921	1.1	0.26
r	Tide gauge	VM	2017-02-02		42°24'49.6"	173°42'09.4"	Carpophyllum	Sheltered	0.45	1.781	0.871	1.1	0.26
s	Tide gauge	VM	2017-02-02		42°24'49.6"	173°42'09.4"	Carpophyllum	Sheltered	0.5	1.781	0.921	1.1	0.26
t	Tide gauge	VM	2017-02-02		42°24'49.6"	173°42'09.4"	Carpophyllum	Sheltered	0.5	1.781	0.921	1.1	0.26
u	Tide gauge	VM	2017-02-02	14:10:00	42°24'49.6"	173°42'09.4"	Carpophyllum	Sheltered	0.5	1.781	0.921	1.1	0.26
a	Tide gauge	AN	2017-02-02	13:35:00	1657711	5304052	Carpophyllum	Sheltered	0.52	1.848	1.008	1.1	0.26	0.985895		0.985895	0.059961
b	Tide gauge	AN	2017-02-02		1657711	5304052	Carpophyllum	Sheltered	0.42	1.848	0.908	1.1	0.26
c	Tide gauge	AN	2017-02-02		1657711	5304052	Carpophyllum	Sheltered	0.5	1.848	0.988	1.1	0.26
d	Tide gauge	AN	2017-02-02		1657711	5304052	Carpophyllum	Sheltered	0.53	1.848	1.018	1.1	0.26
e	Tide gauge	AN	2017-02-02		1657711	5304052	Durvillaea	Sheltered	0.54	1.848	0.908	1.1	0.38
f	Tide gauge	AN	2017-02-02		1657711	5304052	Carpophyllum	Sheltered	0.4	1.848	0.888	1.1	0.26
g	Tide gauge	AN	2017-02-02		1657711	5304052	Carpophyllum	Sheltered	0.5	1.848	0.988	1.1	0.26
h	Tide gauge	AN	2017-02-02		1657711	5304052	Carpophyllum	Sheltered	0.46	1.848	0.948	1.1	0.26
i	Tide gauge	AN	2017-02-02		1657711	5304052	Carpophyllum	Sheltered	0.48	1.848	0.968	1.1	0.26
j	Tide gauge	AN	2017-02-02		1657711	5304052	Carpophyllum	Sheltered	0.5	1.848	0.988	1.1	0.26
k	Tide gauge	AN	2017-02-02		1657711	5304052	Durvillaea	Sheltered	0.6	1.848	0.968	1.1	0.38
l	Tide gauge	AN	2017-02-02		1657711	5304052	Durvillaea	Sheltered	0.6	1.848	0.968	1.1	0.38
m	Tide gauge	AN	2017-02-02		1657711	5304052	Carpophyllum	Sheltered	0.5	1.848	0.988	1.1	0.26
n	Tide gauge	AN	2017-02-02		1657711	5304052	Durvillaea	Sheltered	0.53	1.848	0.898	1.1	0.38
o	Tide gauge	AN	2017-02-02		1657711	5304052	Carpophyllum	Sheltered	0.6	1.848	1.088	1.1	0.26
p	Tide gauge	AN	2017-02-02		1657711	5304052	Durvillaea	Sheltered	0.65	1.848	1.018	1.1	0.38
q	Tide gauge	AN	2017-02-02		1657711	5304052	Carpophyllum	Sheltered	0.55	1.848	1.038	1.1	0.26
r	Tide gauge	AN	2017-02-02		1657711	5304052	Durvillaea	Sheltered/exposed	0.7	1.848	1.068	1.1	0.38
s	Tide gauge	AN	2017-02-02	14:05:00	1657711	5304052	Carpophyllum	Sheltered	0.6	1.848	1.088	1.1	0.26
1	Tide Gauge	VM	2017-02-08	20:03:00	1657845	5304112	Durvillaea	Sheltered	1.35	1.281	1.151	1.1	0.38	1.185		1.185	0.0788126
2	Tide Gauge	VM	2017-02-08		42°24'47.3"	173°42'10.9"	Durvillaea	Sheltered	1.55	1.281	1.351	1.1	0.38
3	Tide Gauge	VM	2017-02-08		42°24'47.3"	173°42'10.9"	Durvillaea	Sheltered	1.4	1.281	1.201	1.1	0.38
4	Tide Gauge	VM	2017-02-08		42°24'47.3"	173°42'10.9"	Durvillaea	Sheltered	1.35	1.281	1.151	1.1	0.38
5	Tide Gauge	VM	2017-02-08		42°24'47.3"	173°42'10.9"	Durvillaea	Sheltered	1.25	1.281	1.051	1.1	0.38
6	Tide Gauge	VM	2017-02-08		42°24'47.3"	173°42'10.9"	Durvillaea	Sheltered	1.3	1.281	1.101	1.1	0.38
7	Tide Gauge	VM	2017-02-08		42°24'47.3"	173°42'10.9"	Durvillaea	Sheltered	1.45	1.281	1.251	1.1	0.38
8	Tide Gauge	VM	2017-02-08		42°24'47.3"	173°42'10.9"	Durvillaea	Sheltered	1.35	1.281	1.151	1.1	0.38
9	Tide Gauge	VM	2017-02-08		42°24'47.3"	173°42'10.9"	Durvillaea	Sheltered	1.33	1.281	1.131	1.1	0.38
10	Tide Gauge	VM	2017-02-08		42°24'47.3"	173°42'10.9"	Durvillaea	Exposed	1.4	1.281	1.201	1.1	0.38
11	Tide Gauge	VM	2017-02-08		42°24'47.3"	173°42'10.9"	Durvillaea	Exposed	1.3	1.281	1.101	1.1	0.38
12	Tide Gauge	VM	2017-02-08		42°24'47.3"	173°42'10.9"	Durvillaea	Exposed	1.4	1.281	1.201	1.1	0.38
13	Tide Gauge	VM	2017-02-08		42°24'47.3"	173°42'10.9"	Durvillaea	Exposed	1.5	1.281	1.301	1.1	0.38
14	Tide Gauge	VM	2017-02-08		42°24'47.3"	173°42'10.9"	Durvillaea	Exposed	1.4	1.281	1.201	1.1	0.38
15	Tide Gauge	VM	2017-02-08	20:25:00	42°24'47.3"	173°42'10.9"	Durvillaea	Exposed	1.43	1.281	1.231	1.1	0.38
1	Tide Gauge	JB	2017-02-08	20:03:00	1657914	5304122	Carpophyllum	Exposed	1.15	1.281	1.071	1.1	0.26	1.11747		1.11747	0.106357
2	Tide Gauge	JB	2017-02-08		1657914	5304122	Carpophyllum	Exposed	1.2	1.281	1.121	1.1	0.26
3	Tide Gauge	JB	2017-02-08		1657914	5304122	Carpophyllum	Exposed	1.25	1.281	1.171	1.1	0.26
4	Tide Gauge	JB	2017-02-08		1657914	5304122	Carpophyllum	Exposed	1.15	1.281	1.071	1.1	0.26
5	Tide Gauge	JB	2017-02-08		1657914	5304122	Carpophyllum	Exposed	1.1	1.281	1.021	1.1	0.26
6	Tide Gauge	JB	2017-02-08		1657914	5304122	Carpophyllum	Exposed	1.2	1.281	1.121	1.1	0.26
7	Tide Gauge	JB	2017-02-08		1657914	5304122	Carpophyllum	Exposed	1.15	1.281	1.071	1.1	0.26
10	Tide Gauge	JB	2017-02-08		1657914	5304122	Carpophyllum	Exposed	1.2	1.281	1.121	1.1	0.26
11	Tide Gauge	JB	2017-02-08		1657914	5304122	Carpophyllum	Exposed	1.1	1.281	1.021	1.1	0.26
12	Tide Gauge	JB	2017-02-08		1657914	5304122	Durvillaea	Exposed	1.55	1.281	1.351	1.1	0.38
13	Tide Gauge	JB	2017-02-08		1657914	5304122	Durvillaea	Exposed	1.5	1.281	1.301	1.1	0.38
14	Tide Gauge	JB	2017-02-08		1657914	5304122	Carpophyllum	Exposed	1.25	1.281	1.171	1.1	0.26
15	Tide Gauge	JB	2017-02-08		1657914	5304122	Carpophyllum	Exposed	1.3	1.281	1.221	1.1	0.26
16	Tide Gauge	JB	2017-02-08		1657914	5304122	Carpophyllum	Sheltered	1	1.281	0.921	1.1	0.26
17	Tide Gauge	JB	2017-02-08		1657914	5304122	Carpophyllum	Exposed	1.1	1.281	1.021	1.1	0.26
18	Tide Gauge	JB	2017-02-08		1657914	5304122	Carpophyllum	Exposed	1.15	1.281	1.071	1.1	0.26
19	Tide Gauge	JB	2017-02-08		1657914	5304122	Durvillaea	Exposed	1.35	1.281	1.151	1.1	0.38
1	Kaikoura south side-1	VM	2017-02-04	16:30:00	1656637	5302664	Carpophyllum	Sheltered	0.4	1.568	0.608	1.1	0.26	0.668		0.668	0.0603561
2	Kaikoura south side-1	VM	2017-02-04		1656637	5302664	Carpophyllum	Sheltered	0.3	1.568	0.508	1.1	0.26
3	Kaikoura south side-1	VM	2017-02-04		1656637	5302664	Carpophyllum	Sheltered	0.5	1.568	0.708	1.1	0.26
4	Kaikoura south side-1	VM	2017-02-04		1656637	5302664	Carpophyllum	Sheltered	0.45	1.568	0.658	1.1	0.26
5	Kaikoura south side-1	VM	2017-02-04		1656637	5302664	Carpophyllum	Sheltered	0.5	1.568	0.708	1.1	0.26
6	Kaikoura south side-1	VM	2017-02-04		1656637	5302664	Carpophyllum	Sheltered	0.5	1.568	0.708	1.1	0.26
7	Kaikoura south side-1	VM	2017-02-04		1656637	5302664	Carpophyllum	Sheltered	0.45	1.568	0.658	1.1	0.26
8	Kaikoura south side-1	VM	2017-02-04		1656637	5302664	Carpophyllum	Sheltered	0.5	1.568	0.708	1.1	0.26
9	Kaikoura south side-1	VM	2017-02-04		1656637	5302664	Carpophyllum	Sheltered	0.5	1.568	0.708	1.1	0.26
10	Kaikoura south side-1	VM	2017-02-04		1656637	5302664	Carpophyllum	Sheltered	0.5	1.568	0.708	1.1	0.26
11	Kaikoura south side-1	VM	2017-02-04		1656637	5302664	Carpophyllum	Sheltered	0.45	1.568	0.658	1.1	0.26
12	Kaikoura south side-1	VM	2017-02-04		1656637	5302664	Carpophyllum	Sheltered	0.4	1.568	0.608	1.1	0.26
13	Kaikoura south side-1	VM	2017-02-04		1656637	5302664	Carpophyllum	Sheltered	0.45	1.568	0.658	1.1	0.26
14	Kaikoura south side-1	VM	2017-02-04		1656637	5302664	Carpophyllum	Sheltered	0.55	1.568	0.758	1.1	0.26
15	Kaikoura south side-1	VM	2017-02-04	16:35:00	1656637	5302664	Carpophyllum	Sheltered	0.45	1.568	0.658	1.1	0.26
1	Kaikoura Harbour	VM	2017-02-04	16:52:00	42°25'35.6"	173°40'53.7"	Carpophyllum	Sheltered	0.45	1.445	0.535	1.1	0.26	0.558333		0.662891	0.10139
2	Kaikoura Harbour	VM	2017-02-04		42°25'35.6"	173°40'53.7"	Carpophyllum	Sheltered	0.4	1.445	0.485	1.1	0.26
3	Kaikoura Harbour	VM	2017-02-04		42°25'35.6"	173°40'53.7"	Carpophyllum	Sheltered	0.4	1.445	0.485	1.1	0.26
4	Kaikoura Harbour	VM	2017-02-04		42°25'35.6"	173°40'53.7"	Carpophyllum	Sheltered	0.6	1.445	0.685	1.1	0.26
5	Kaikoura Harbour	VM	2017-02-04		42°25'35.6"	173°40'53.7"	Carpophyllum	Sheltered	0.4	1.445	0.485	1.1	0.26
6	Kaikoura Harbour	VM	2017-02-04		42°25'35.6"	173°40'53.7"	Carpophyllum	Sheltered	0.45	1.445	0.535	1.1	0.26
7	Kaikoura Harbour	VM	2017-02-04		42°25'35.6"	173°40'53.7"	Carpophyllum	Sheltered	0.4	1.445	0.485	1.1	0.26
8	Kaikoura Harbour	VM	2017-02-04		42°25'35.6"	173°40'53.7"	Carpophyllum	Sheltered	0.5	1.445	0.585	1.1	0.26
9	Kaikoura Harbour	VM	2017-02-04		42°25'35.6"	173°40'53.7"	Carpophyllum	Sheltered	0.45	1.445	0.535	1.1	0.26
10	Kaikoura Harbour	VM	2017-02-04		42°25'35.6"	173°40'53.7"	Carpophyllum	Sheltered	0.45	1.445	0.535	1.1	0.26
11	Kaikoura Harbour	VM	2017-02-04		42°25'35.6"	173°40'53.7"	Carpophyllum	Sheltered	0.5	1.445	0.585	1.1	0.26
12	Kaikoura Harbour	VM	2017-02-04		42°25'35.6"	173°40'53.7"	Carpophyllum	Sheltered	0.45	1.445	0.535	1.1	0.26
13	Kaikoura Harbour	VM	2017-02-04		42°25'35.6"	173°40'53.7"	Carpophyllum	Sheltered	0.5	1.445	0.585	1.1	0.26
14	Kaikoura Harbour	VM	2017-02-04		42°25'35.6"	173°40'53.7"	Carpophyllum	Sheltered	0.55	1.445	0.635	1.1	0.26
15	Kaikoura Harbour	VM	2017-02-04	17:00:00	42°25'35.6"	173°40'53.7"	Carpophyllum	Sheltered	0.6	1.445	0.685	1.1	0.26
1	Kaikoura Harbour	JB	2017-02-04	16:30:00	42°25'35.4"	173°41'16.5"	Carpophyllum	Sheltered	0.45	1.568	0.658	1.1	0.26	0.717375
2	Kaikoura Harbour	JB	2017-02-04		42°25'35.4"	173°41'16.5"	Carpophyllum	Sheltered	0.5	1.568	0.708	1.1	0.26
3	Kaikoura Harbour	JB	2017-02-04		42°25'35.4"	173°41'16.5"	Carpophyllum	Sheltered	0.55	1.568	0.758	1.1	0.26
4	Kaikoura Harbour	JB	2017-02-04		42°25'35.4"	173°41'16.5"	Carpophyllum	Sheltered	0.6	1.568	0.808	1.1	0.26
5	Kaikoura Harbour	JB	2017-02-04		42°25'35.4"	173°41'16.5"	Carpophyllum	Sheltered	0.5	1.568	0.708	1.1	0.26
6	Kaikoura Harbour	JB	2017-02-04		42°25'35.4"	173°41'16.5"	Carpophyllum	Sheltered	0.45	1.568	0.658	1.1	0.26
7	Kaikoura Harbour	JB	2017-02-04		42°25'35.4"	173°41'16.5"	Carpophyllum	Sheltered	0.5	1.568	0.708	1.1	0.26
8	Kaikoura Harbour	JB	2017-02-04		42°25'35.4"	173°41'16.5"	Carpophyllum	Sheltered	0.6	1.568	0.808	1.1	0.26
9	Kaikoura Harbour	JB	2017-02-04		42°25'35.4"	173°41'16.5"	Carpophyllum	Sheltered	0.55	1.568	0.758	1.1	0.26
10	Kaikoura Harbour	JB	2017-02-04		42°25'35.4"	173°41'16.5"	Carpophyllum	Sheltered	0.5	1.568	0.708	1.1	0.26
11	Kaikoura Harbour	JB	2017-02-04		42°25'35.4"	173°41'16.5"	Carpophyllum	Sheltered	0.5	1.568	0.708	1.1	0.26
12	Kaikoura Harbour	JB	2017-02-04		42°25'35.4"	173°41'16.5"	Carpophyllum	Sheltered	0.5	1.568	0.708	1.1	0.26
13	Kaikoura Harbour	JB	2017-02-04		42°25'35.4"	173°41'16.5"	Carpophyllum	Sheltered	0.5	1.568	0.708	1.1	0.26
14	Kaikoura Harbour	JB	2017-02-04		42°25'35.4"	173°41'16.5"	Carpophyllum	Sheltered	0.5	1.568	0.708	1.1	0.26
15	Kaikoura Harbour	JB	2017-02-04		42°25'35.4"	173°41'16.5"	Carpophyllum	Sheltered	0.4	1.568	0.608	1.1	0.26
16	Kaikoura Harbour	JB	2017-02-04	16:40:00	42°25'35.4"	173°41'16.5"	Carpophyllum	Sheltered	0.55	1.568	0.758	1.1	0.26
1	Kaikoura Harbour	JB	2017-02-04	16:55:00	42°25'35.6"	173°40'53.7"	Carpophyllum	Sheltered	0.6	1.436	0.676	1.1	0.26	0.709333
2	Kaikoura Harbour	JB	2017-02-04		42°25'35.6"	173°40'53.7"	Carpophyllum	Sheltered	0.5	1.436	0.576	1.1	0.26
3	Kaikoura Harbour	JB	2017-02-04		42°25'35.6"	173°40'53.7"	Carpophyllum	Sheltered	0.6	1.436	0.676	1.1	0.26
4	Kaikoura Harbour	JB	2017-02-04		42°25'35.6"	173°40'53.7"	Carpophyllum	Sheltered	0.5	1.436	0.576	1.1	0.26
5	Kaikoura Harbour	JB	2017-02-04		42°25'35.6"	173°40'53.7"	Carpophyllum	Sheltered	0.6	1.436	0.676	1.1	0.26
6	Kaikoura Harbour	JB	2017-02-04		42°25'35.6"	173°40'53.7"	Carpophyllum	Sheltered	0.7	1.436	0.776	1.1	0.26
7	Kaikoura Harbour	JB	2017-02-04		42°25'35.6"	173°40'53.7"	Carpophyllum	Sheltered	0.5	1.436	0.576	1.1	0.26
8	Kaikoura Harbour	JB	2017-02-04		42°25'35.6"	173°40'53.7"	Carpophyllum	Sheltered	0.8	1.436	0.876	1.1	0.26
9	Kaikoura Harbour	JB	2017-02-04		42°25'35.6"	173°40'53.7"	Carpophyllum	Sheltered	0.7	1.436	0.776	1.1	0.26
10	Kaikoura Harbour	JB	2017-02-04		42°25'35.6"	173°40'53.7"	Carpophyllum	Sheltered	0.7	1.436	0.776	1.1	0.26
11	Kaikoura Harbour	JB	2017-02-04		42°25'35.6"	173°40'53.7"	Carpophyllum	Sheltered	0.7	1.436	0.776	1.1	0.26
12	Kaikoura Harbour	JB	2017-02-04		42°25'35.6"	173°40'53.7"	Carpophyllum	Sheltered	0.7	1.436	0.776	1.1	0.26
13	Kaikoura Harbour	JB	2017-02-04		42°25'35.6"	173°40'53.7"	Carpophyllum	Sheltered	0.7	1.436	0.776	1.1	0.26
14	Kaikoura Harbour	JB	2017-02-04		42°25'35.6"	173°40'53.7"	Carpophyllum	Sheltered	0.6	1.436	0.676	1.1	0.26
15	Kaikoura Harbour	JB	2017-02-04	17:00:00	42°25'35.6"	173°40'53.7"	Carpophyllum	Sheltered	0.6	1.436	0.676	1.1	0.26
